# Supplementary material for: An Immunoinformatics Study to Predict Epitopes in the Envelope Protein of SARS-CoV-2
Source: Can J Infect Dis Med Microbiol. 2020 Nov 25;2020:7079356. doi: 10.1155/2020/7079356 (PMC7686850; doi:10.1155/2020/7079356)
Supplement: Supplementary Materials — All sequences of the SARS-CoV-2 considered in this study are given. [file 7079356.f1.txt]

>YP_009724392.1 |envelope protein [Severe acute respiratory syndrome coronavirus 2]
MYSFVSEETGTLIVNSVLLFLAFVVFLLVTLAILTALRLCAYCCNIVNVSLVKPSFYVYS
RVKNLNSSRVPDLLV
>QNQ74622.1 |envelope protein [Severe acute respiratory syndrome coronavirus 2]
MYSFVSEETGTLIVNSVLLFLAFVVFLLVTLAILTALRLCAYCCNIVNVSLVKPSFYVYS
RVKNLNSSRVPDLLV
>QNQ74634.1 |envelope protein [Severe acute respiratory syndrome coronavirus 2]
MYSFVSEETGTLIVNSVLLFLAFVVFLLVTLAILTALRLCAYCCNIVNVSLVKPSFYVYS
RVKNLNSSRVPDLLV
>QNQ15598.1 |envelope protein [Severe acute respiratory syndrome coronavirus 2]
MYSFVSEETGTLIVNSVLLFLAFVVFLLVTLAILTALRLCAYCCNIVNVSLVKPSFYVYS
RVKNLNSSRVPDLLV
>QNQ15610.1 |envelope protein [Severe acute respiratory syndrome coronavirus 2]
MYSFVSEETGTLIVNSVLLFLAFVVFLLVTLAILTALRLCAYCCNIVNVSLVKPSFYVYS
RVKNLNSSRVPDLLV
>QNQ15622.1 |envelope protein [Severe acute respiratory syndrome coronavirus 2]
MYSFVSEETGTLIVNSVLLFLAFVVFLLVTLAILTALRLCAYCCNIVNVSLVKPSFYVYS
RVKNLNSSRVPDLLV
>QNQ15634.1 |envelope protein [Severe acute respiratory syndrome coronavirus 2]
MYSFVSEETGTLIVNSVLLFLAFVVFLLVTLAILTALRLCAYCCNIVNVSLVKPSFYVYS
RVKNLNSSRVPDLLV
>QNQ15646.1 |envelope protein [Severe acute respiratory syndrome coronavirus 2]
MYSFVSEETGTLIVNSVLLFLAFVVFLLVTLAILTALRLCAYCCNIVNVSLVKPSFYVYS
RVKNLNSSRVPDLLV
>QNQ15658.1 |envelope protein [Severe acute respiratory syndrome coronavirus 2]
MYSFVSEETGTLIVNSVLLFLAFVVFLLVTLAILTALRLCAYCCNIVNVSLVKPSFYVYS
RVKNLNSSRVPDLLV
>QNQ15670.1 |envelope protein [Severe acute respiratory syndrome coronavirus 2]
MYSFVSEETGTLIVNSVLLFLAFVVFLLVTLAILTALRLCAYCCNIVNVSLVKPSFYVYS
RVKNLNSSRVPDLLV
>QNQ15682.1 |envelope protein [Severe acute respiratory syndrome coronavirus 2]
MYSFVSEETGTLIVNSVLLFLAFVVFLLVTLAILTALRLCAYCCNIVNVSLVKPSFYVYS
RVKNLNSSRVPDLLV
>QNQ15694.1 |envelope protein [Severe acute respiratory syndrome coronavirus 2]
MYSFVSEETGTLIVNSVLLFLAFVVFLLVTLAILTALRLCAYCCNIVNVSLVKPSFYVYS
RVKNLNSSRVPDLLV
>QNQ15706.1 |envelope protein [Severe acute respiratory syndrome coronavirus 2]
MYSFVSEETGTLIVNSVLLFLAFVVFLLVTLAILTALRLCAYCCNIVNVSLVKPSFYVYS
RVKNLNSSRVPDLLV
>QNQ15718.1 |envelope protein [Severe acute respiratory syndrome coronavirus 2]
MYSFVSEETGTLIVNSVLLFLAFVVFLLVTLAILTALRLCAYCCNIVNVSLVKPSFYVYS
RVKNLNSSRVPDLLV
>QNQ15730.1 |envelope protein [Severe acute respiratory syndrome coronavirus 2]
MYSFVSEETGTLIVNSVLLFLAFVVFLLVTLAILTALRLCAYCCNIVNVSLVKPSFYVYS
RVKNLNSSRVPDLLV
>QNQ15742.1 |envelope protein [Severe acute respiratory syndrome coronavirus 2]
MYSFVSEETGTLIVNSVLLFLAFVVFLLVTLAILTALRLCAYCCNIVNVSLVKPSFYVYS
RVKNLNSSRVPDLLV
>QNQ15754.1 |envelope protein [Severe acute respiratory syndrome coronavirus 2]
MYSFVSEETGTLIVNSVLLFLAFVVFLLVTLAILTALRLCAYCCNIVNVSLVKPSFYVYS
RVKNLNSSRVPDLLV
>QNQ15766.1 |envelope protein [Severe acute respiratory syndrome coronavirus 2]
MYSFVSEETGTLIVNSVLLFLAFVVFLLVTLAILTALRLCAYCCNIVNVSLVKPSFYVYS
RVKNLNSSRVPDLLV
>QNQ15778.1 |envelope protein [Severe acute respiratory syndrome coronavirus 2]
MYSFVSEETGTLIVNSVLLFLAFVVFLLVTLAILTALRLCAYCCNIVNVSLVKPSFYVYS
RVKNLNSSRVPDLLV
>QNQ15790.1 |envelope protein [Severe acute respiratory syndrome coronavirus 2]
MYSFVSEETGTLIVNSVLLFLAFVVFLLVTLAILTALRLCAYCCNIVNVSLVKPSFYVYS
RVKNLNSSRVPDLLV
>QNQ15802.1 |envelope protein [Severe acute respiratory syndrome coronavirus 2]
MYSFVSEETGTLIVNSVLLFLAFVVFLLVTLAILTALRLCAYCCNIVNVSLVKPSFYVYS
RVKNLNSSRVPDLLV
>QNQ15814.1 |envelope protein [Severe acute respiratory syndrome coronavirus 2]
MYSFVSEETGTLIVNSVLLFLAFVVFLLVTLAILTALRLCAYCCNIVNVSLVKPSFYVYS
RVKNLNSSRVPDLLV
>QNQ15826.1 |envelope protein [Severe acute respiratory syndrome coronavirus 2]
MYSFVSEETGTLIVNSVLLFLAFVVFLLVTLAILTALRLCAYCCNIVNVSLVKPSFYVYS
RVKNLNSSRVPDLLV
>QNQ15838.1 |envelope protein [Severe acute respiratory syndrome coronavirus 2]
MYSFVSEETGTLIVNSVLLFLAFVVFLLVTLAILTALRLCAYCCNIVNVSLVKPSFYVYS
RVKNLNSSRVPDLLV
>QNQ15850.1 |envelope protein [Severe acute respiratory syndrome coronavirus 2]
MYSFVSEETGTLIVNSVLLFLAFVVFLLVTLAILTALRLCAYCCNIVNVSLVKPSFYVYS
RVKNLNSSRVPDLLV
>QNQ15862.1 |envelope protein [Severe acute respiratory syndrome coronavirus 2]
MYSFVSEETGTLIVNSVLLFLAFVVFLLVTLAILTALRLCAYCCNIVNVSLVKPSFYVYS
RVKNLNSSRVPDLLV
>QNQ16651.1 |envelope protein [Severe acute respiratory syndrome coronavirus 2]
MYSFVSEETGTLIVNSVLLFLAFVVFLLVTLAILTALRLCAYCCNIVNVSLVKPSFYVYS
RVKNLNSSRVPDLLV
>QNQ16663.1 |envelope protein [Severe acute respiratory syndrome coronavirus 2]
MYSFVSEETGTLIVNSVLLFLAFVVFLLVTLAILTALRLCAYCCNIVNVSLVKPSFYVYS
RVKNLNSSRVPDLLV
>QNQ16675.1 |envelope protein [Severe acute respiratory syndrome coronavirus 2]
MYSFVSEETGTLIVNSVLLFLAFVVFLLVTLAILTALRLCAYCCNIVNVSLVKPSFYVYS
RVKNLNSSRVPDLLV
>QNQ16687.1 |envelope protein [Severe acute respiratory syndrome coronavirus 2]
MYSFVSEETGTLIVNSVLLFLAFVVFLLVTLAILTALRLCAYCCNIVNVSLVKPSFYVYS
RVKNLNSSRVPDLLV
>QNQ16699.1 |envelope protein [Severe acute respiratory syndrome coronavirus 2]
MYSFVSEETGTLIVNSVLLFLAFVVFLLVTLAILTALRLCAYCCNIVNVSLVKPSFYVYS
RVKNLNSSRVPDLLV
>QNQ16711.1 |envelope protein [Severe acute respiratory syndrome coronavirus 2]
MYSFVSEETGTLIVNSVLLFLAFVVFLLVTLAILTALRLCAYCCNIVNVSLVKPSFYVYS
RVKNLNSSRVPDLLV
>QNQ16723.1 |envelope protein [Severe acute respiratory syndrome coronavirus 2]
MYSFVSEETGTLIVNSVLLFLAFVVFLLVTLAILTALRLCAYCCNIVNVSLVKPSFYVYS
RVKNLNSSRVPDLLV
>QNQ16735.1 |envelope protein [Severe acute respiratory syndrome coronavirus 2]
MYSFVSEETGTLIVNSVLLFLAFVVFLLVTLAILTALRLCAYCCNIVNVSLVKPSFYVYS
RVKNLNSSRVPDLLV
>QNQ16747.1 |envelope protein [Severe acute respiratory syndrome coronavirus 2]
MYSFVSEETGTLIVNSVLLFLAFVVFLLVTLAILTALRLCAYCCNIVNVSLVKPSFYVYS
RVKNLNSSRVPDLLV
>QNQ16759.1 |envelope protein [Severe acute respiratory syndrome coronavirus 2]
MYSFVSEETGTLIVNSVLLFLAFVVFLLVTLAILTALRLCAYCCNIVNVSLVKPSFYVYS
RVKNLNSSRVPDLLV
>QNQ16771.1 |envelope protein [Severe acute respiratory syndrome coronavirus 2]
MYSFVSEETGTLIVNSVLLFLAFVVFLLVTLAILTALRLCAYCCNIVNVSLVKPSFYVYS
RVKNLNSSRVPDLLV
>QNQ16783.1 |envelope protein [Severe acute respiratory syndrome coronavirus 2]
MYSFVSEETGTLIVNSVLLFLAFVVFLLVTLAILTALRLCAYCCNIVNVSLVKPSFYVYS
RVKNLNSSRVPDLLV
>QNQ16795.1 |envelope protein [Severe acute respiratory syndrome coronavirus 2]
MYSFVSEETGTLIVNSVLLFLAFVVFLLVTLAILTALRLCAYCCNIVNVSLVKPSFYVYS
RVKNLNSSRVPDLLV
>QNQ16807.1 |envelope protein [Severe acute respiratory syndrome coronavirus 2]
MYSFVSEETGTLIVNSVLLFLAFVVFLLVTLAILTALRLCAYCCNIVNVSLVKPSFYVYS
RVKNLNSSRVPDLLV
>QNQ16819.1 |envelope protein [Severe acute respiratory syndrome coronavirus 2]
MYSFVSEETGTLIVNSVLLFLAFVVFLLVTLAILTALRLCAYCCNIVNVSLVKPSFYVYS
RVKNLNSSRVPDLLV
>QNQ16831.1 |envelope protein [Severe acute respiratory syndrome coronavirus 2]
MYSFVSEETGTLIVNSVLLFLAFVVFLLVTLAILTALRLCAYCCNIVNVSLVKPSFYVYS
RVKNLNSSRVPDLLV
>QNQ16843.1 |envelope protein [Severe acute respiratory syndrome coronavirus 2]
MYSFVSEETGTLIVNSVLLFLAFVVFLLVTLAILTALRLCAYCCNIVNVSLVKPSFYVYS
RVKNLNSSRVPDLLV
>QNQ16855.1 |envelope protein [Severe acute respiratory syndrome coronavirus 2]
MYSFVSEETGTLIVNSVLLFLAFVVFLLVTLAILTALRLCAYCCNIVNVSLVKPSFYVYS
RVKNLNSSRVLDLLV
>QNQ16867.1 |envelope protein [Severe acute respiratory syndrome coronavirus 2]
MYSFVSEETGTLIVNSVLLFLAFVVFLLVTLAILTALRLCAYCCNIVNVSLVKPSFYVYS
RVKNLNSSRVPDLLV
>QNQ16879.1 |envelope protein [Severe acute respiratory syndrome coronavirus 2]
MYSFVSEETGTLIVNSVLLFLAFVVFLLVTLAILTALRLCAYCCNIVNVSLVKPSFYVYS
RVKNLNSSRVPDLLV
>QNQ16891.1 |envelope protein [Severe acute respiratory syndrome coronavirus 2]
MYSFVSEETGTLIVNSVLLFLAFVVFLLVTLAILTALRLCAYCCNIVNVSLVKPSFYVYS
RVKNLNSSRVPDLLV
>QNQ16903.1 |envelope protein [Severe acute respiratory syndrome coronavirus 2]
MYSFVSEETGTLIVNSVLLFLAFVVFLLVTLAILTALRLCAYCCNIVNVSLVKPSFYVYS
RVKNLNSSRVPDLLV
>QNQ16915.1 |envelope protein [Severe acute respiratory syndrome coronavirus 2]
MYSFVSEETGTLIVNSVLLFLAFVVFLLVTLAILTALRLCAYCCNIVNVSLVKPSFYVYS
RVKNLNSSRVPDLLV
>QNQ16927.1 |envelope protein [Severe acute respiratory syndrome coronavirus 2]
MYSFVSEETGTLIVNSVLLFLAFVVFLLVTLAILTALRLCAYCCNIVNVSLVKPSFYVYS
RVKNLNSSRVPDLLV
>QNQ16939.1 |envelope protein [Severe acute respiratory syndrome coronavirus 2]
MYSFVSEETGTLIVNSVLLFLAFVVFLLVTLAILTALRLCAYCCNIVNVSLVKPSFYVYS
RVKNLNSSRVPDLLV
>QNQ16951.1 |envelope protein [Severe acute respiratory syndrome coronavirus 2]
MYSFVSEETGTLIVNSVLLFLAFVVFLLVTLAILTALRLCAYCCNIVNVSLVKPSFYVYS
RVKNLNSSRVPDLLV
>QNQ16963.1 |envelope protein [Severe acute respiratory syndrome coronavirus 2]
MYSFVSEETGTLIVNSVLLFLAFVVFLLVTLAILTALRLCAYCCNIVNVSLVKPSFYVYS
RVKNLNSSRVPDLLV
>QNQ16975.1 |envelope protein [Severe acute respiratory syndrome coronavirus 2]
MYSFVSEETGTLIVNSVLLFLAFVVFLLVTLAILTALRLCAYCCNIVNVSLVKPSFYVYS
RVKNLNSSRVPDLLV
>QNQ16987.1 |envelope protein [Severe acute respiratory syndrome coronavirus 2]
MYSFVSEETGTLIVNSVLLFLAFVVFLLVTLAILTALRLCAYCCNIVNVSLVKPSFYVYS
RVKNLNSSRVPDLLV
>QNQ16999.1 |envelope protein [Severe acute respiratory syndrome coronavirus 2]
MYSFVSEETGTLIVNSVLLFLAFVVFLLVTLAILTALRLCAYCCNIVNVSLVKPSFYVYS
RVKNLNSSRVPDLLV
>QNQ17011.1 |envelope protein [Severe acute respiratory syndrome coronavirus 2]
MYSFVSEETGTLIVNSVLLFLAFVVFLLVTLAILTALRLCAYCCNIVNVSLVKPSFYVYS
RVKNLNSSRVPDLLV
>QNQ17023.1 |envelope protein [Severe acute respiratory syndrome coronavirus 2]
MYSFVSEETGTLIVNSVLLFLAFVVFLLVTLAILTALRLCAYCCNIVNVSLVKPSFYVYS
RVKNLNSSRVPDLLV
>QNQ17035.1 |envelope protein [Severe acute respiratory syndrome coronavirus 2]
MYSFVSEETGTLIVNSVLLFLAFVVFLLVTLAILTALRLCAYCCNIVNVSLVKPSFYVYS
RVKNLNSSRVPDLLV
>QNQ17047.1 |envelope protein [Severe acute respiratory syndrome coronavirus 2]
MYSFVSEETGTLIVNSVLLFLAFVVFLLVTLAILTALRLCAYCCNIVNVSLVKPSFYVYS
RVKNLNSSRVPDLLV
>QNQ17059.1 |envelope protein [Severe acute respiratory syndrome coronavirus 2]
MYSFVSEETGTLIVNSVLLLLAFVVFLLVTLAILTALRLCAYCCNIVNVSLVKPSFYVYS
RVKNLNSSRVPDLLV
>QNQ17071.1 |envelope protein [Severe acute respiratory syndrome coronavirus 2]
MYSFVSEETGTLIVNSVLLFLAFVVFLLVTLAILTALRLCAYCCNIVNVSLVKPSFYVYS
RVKNLNSSRVPDLLV
>QNQ17083.1 |envelope protein [Severe acute respiratory syndrome coronavirus 2]
MYSFVSEETGTLIVNSVLLFLAFVVFLLVTLAILTALRLCAYCCNIVNVSLVKPSFYVYS
RVKNLNSSRVPDLLV
>QNQ17095.1 |envelope protein [Severe acute respiratory syndrome coronavirus 2]
MYSFVSEETGTLIVNSVLLFLAFVVFLLVTLAILTALRLCAYCCNIVNVSLVKPSFYVYS
RVKNLNSSRVPDLLV
>QNQ17107.1 |envelope protein [Severe acute respiratory syndrome coronavirus 2]
MYSFVSEETGTLIVNSVLLFLAFVVFLLVTLAILTALRLCAYCCNIVNVSLVKPSFYVYS
RVKNLNSSRVPDLLV
>QNQ17119.1 |envelope protein [Severe acute respiratory syndrome coronavirus 2]
MYSFVSEETGTLIVNSVLLFLAFVVFLLVTLAILTALRLCAYCCNIVNVSLVKPSFYVYS
RVKNLNSSRVPDLLV
>QNQ17131.1 |envelope protein [Severe acute respiratory syndrome coronavirus 2]
MYSFVSEETGTLIVNSVLLFLAFVVFLLVTLAILTALRLCAYCCNIVNVSLVKPSFYVYS
RVKNLNSSRVPDLLV
>QNQ17143.1 |envelope protein [Severe acute respiratory syndrome coronavirus 2]
MYSFVSEETGTLIVNSVLLFLAFVVFLLVTLAILTALRLCAYCCNIVNVSLVKPSFYVYS
RVKNLNSFRVPDLLV
>QNQ17155.1 |envelope protein [Severe acute respiratory syndrome coronavirus 2]
MYSFVSEETGTLIVNSVLLFLAFVVFLLVTLAILTALRLCAYCCNIVNVSLVKPSFYVYS
RVKNLNSSRVPDLLV
>QNQ17167.1 |envelope protein [Severe acute respiratory syndrome coronavirus 2]
MYSFVSEETGTLIVNSVLLFLAFVVFLLVTLAILTALRLCAYCCNIVNVSLVKPSFYVYS
RVKNLNSSRVPDLLV
>QNQ17179.1 |envelope protein [Severe acute respiratory syndrome coronavirus 2]
MYSFVSEETGTLIVNSVLLFLAFVVFLLVTLAILTALRLCAYCCNIVNVSLVKPSFYVYS
RVKNLNSSRVPDLLV
>QNQ17191.1 |envelope protein [Severe acute respiratory syndrome coronavirus 2]
MYSFVSEETGTLIVNSVLLFLAFVVFLLVTLAILTALRLCAYCCNIVNVSLVKPSFYVYS
RVKNLNSSRVPDLLV
>QNQ17203.1 |envelope protein [Severe acute respiratory syndrome coronavirus 2]
MYSFVSEETGTLIVNSVLLFLAFVVFLLVTLAILTALRLCAYCCNIVNVSLVKPSFYVYS
RVKNLNSSRVPDLLV
>QNQ17215.1 |envelope protein [Severe acute respiratory syndrome coronavirus 2]
MYSFVSEETGTLIVNSVLLFLAFVVFLLVTLAILTALRLCAYCCNIVNVSLVKPSFYVYS
RVKNLNSSRVPDLLV
>QNQ17227.1 |envelope protein [Severe acute respiratory syndrome coronavirus 2]
MYSFVSEETGTLIVNSVLLFLAFVVFLLVTLAILTALRLCAYCCNIVNVSLVKPSFYVYS
RVKNLNSSRVPDLLV
>QNQ17239.1 |envelope protein [Severe acute respiratory syndrome coronavirus 2]
MYSFVSEETGTLIVNSVLLFLAFVVFLLVTLAILTALRLCAYCCNIVNVSLVKPSFYVYS
RVKNLNSSRVPDLLV
>QNQ17251.1 |envelope protein [Severe acute respiratory syndrome coronavirus 2]
MYSFVSEETGTLIVNSVLLFLAFVVFLLVTLAILTALRLCAYCCNIVNVSLVKPSFYVYS
RVKNLNSSRVPDLLV
>QNQ17263.1 |envelope protein [Severe acute respiratory syndrome coronavirus 2]
MYSFVSEETGTLIVNSVLLFLAFVVFLLVTLAILTALRLCAYCCNIVNVSLVKPSFYVYS
RVKNLNSSRVPDLLV
>QNQ17275.1 |envelope protein [Severe acute respiratory syndrome coronavirus 2]
MYSFVSEETGTLIVNSVLLFLAFVVFLLVTLAILTALRLCAYCCNIVNVSLVKPSFYVYS
RVKNLNSSRVPDLLV
>QNQ17287.1 |envelope protein [Severe acute respiratory syndrome coronavirus 2]
MYSFVSEETGTLIVNSVLLFLAFVVFLLVTLAILTALRLCAYCCNIVNVSLVKPSFYVYS
RVKNLNSSRVPDLLV
>QNQ17299.1 |envelope protein [Severe acute respiratory syndrome coronavirus 2]
MYSFVSEETGTLIVNSVLLFLAFVVFLLVTLAILTALRLCAYCCNIVNVSLVKPSFYVYS
RVKNLNSSRVPDLLV
>QNQ17311.1 |envelope protein [Severe acute respiratory syndrome coronavirus 2]
MYSFVSEETGTLIVNSVLLFLAFVVFLLVTLAILTALRLCAYCCNIVNVSLVKPSFYVYS
RVKNLNSSRVPDLLV
>QNQ17323.1 |envelope protein [Severe acute respiratory syndrome coronavirus 2]
MYSFVSEETGTLIVNSVLLFLAFVVFLLVTLAILTALRLCAYCCNIVNVSLVKPSFYVYS
RVKNLNSSRVPDLLV
>QNQ17335.1 |envelope protein [Severe acute respiratory syndrome coronavirus 2]
MYSFVSEETGTLIVNSVLLFLAFVVFLLVTLAILTALRLCAYCCNIVNVSLVKPSFYVYS
RVKNLNSSRVPDLLV
>QNQ17347.1 |envelope protein [Severe acute respiratory syndrome coronavirus 2]
MYSFVSEETGTLIVNSVLLFLAFVVFLLVTLAILTALRLCAYCCNIVNVSLVKPSFYVYS
RVKNLNSSRVPDLLV
>QNQ17359.1 |envelope protein [Severe acute respiratory syndrome coronavirus 2]
MYSFVSEETGTLIVNSVLLFLAFVVFLLVTLAILTALRLCAYCCNIVNVSLVKPSFYVYS
RVKNLNSSRVPDLLV
>QNQ17370.1 |envelope protein [Severe acute respiratory syndrome coronavirus 2]
MYSFVSEETGTLIVNSVLLFLAFVVFLLVTLAILTALRLCAYCCNIVNVSLVKPSFYVYS
RVKNLNSSRVPDLLV
>QNQ17382.1 |envelope protein [Severe acute respiratory syndrome coronavirus 2]
MYSFVSEETGTLIVNSVLLFLAFVVFLLVTLAILTALRLCAYCCNIVNVSLVKPSFYVYS
RVKNLNSSRVPDLLV
>QNQ17394.1 |envelope protein [Severe acute respiratory syndrome coronavirus 2]
MYSFVSEETGTLIVNSVLLFLAFVVFLLVTLAILTALRLCAYCCNIVNVSLVKPSFYVYS
RVKNLNSSRVPDLLV
>QNQ17406.1 |envelope protein [Severe acute respiratory syndrome coronavirus 2]
MYSFVSEETGTLIVNSVLLFLAFVVFLLVTLAILTALRLCAYCCNIVNVSLVKPSFYVYS
RVKNLNSSRVPDLLV
>QNQ17418.1 |envelope protein [Severe acute respiratory syndrome coronavirus 2]
MYSFVSEETGTLIVNSVLLFLAFVVFLLVTLAILTALRLCAYCCNIVNVSLVKPSFYVYS
RVKNLNSSRVPDLLV
>QNQ17430.1 |envelope protein [Severe acute respiratory syndrome coronavirus 2]
MYSFVSEETGTLIVNSVLLFLAFVVFLLVTLAILTALRLCAYCCNIVNVSLVKPSFYVYS
RVKNLNSSRVPDLLV
>QNP14667.1 |envelope protein [Severe acute respiratory syndrome coronavirus 2]
MYSFVSEETGTLIVNSVLLFLAFVVFLLVTLAILTALRLCAYCCNIVNVSLVKPSFYVYS
RVKNLNSSRVPDLLV
>QNP14679.1 |envelope protein [Severe acute respiratory syndrome coronavirus 2]
MYSFVSEETGTLIVNSVLLFLAFVVFLLVTLAILTALRLCAYCCNIVNVSLVKPSFYVYS
RVKNLNSSRVPDLLV
>QNO30925.1 |envelope protein [Severe acute respiratory syndrome coronavirus 2]
MYSFVSEETGTLIVNSVLLFLAFVVFLLVTLAILTALRLCAYCCNIVNVSLVKPSFYVYS
RVKNLNSSRVPDLLV
>QNO30937.1 |envelope protein [Severe acute respiratory syndrome coronavirus 2]
MYSFVSEETGTLIVNSVLLFLAFVVFLLVTLAILTALRLCAYCCNIVNVSLVKPSFYVYS
RVKNLNSSRVPDLLV
>QNO30958.1 |envelope protein [Severe acute respiratory syndrome coronavirus 2]
MYSFVSEETGTLIVNSVLLFLAFVVFLLVTLAILTALRLCAYCCNIVNVSLVKPSFYVYS
RVKNLNSSRVPDLLV
>QNO30970.1 |envelope protein [Severe acute respiratory syndrome coronavirus 2]
MYSFVSEETGTLIVNSVLLFLAFVVFLLVTLAILTALRLCAYCCNIVNVSLVKPSFYVYS
RVKNLNSSRVPDLLV
>QNO30982.1 |envelope protein [Severe acute respiratory syndrome coronavirus 2]
MYSFVSEETGTLIVNSVLLFLAFVVFLLVTLAILTALRLCAYCCNIVNVSLVKPSFYVYS
RVKNLNSSRVPDLLV
>QNO30994.1 |envelope protein [Severe acute respiratory syndrome coronavirus 2]
MYSFVSEETGTLIVNSVLLFLAFVVFLLVTLAILTALRLCAYCCNIVNVSLVKPSFYVYS
RVKNLNSSRVPDLLV
>QNO31006.1 |envelope protein [Severe acute respiratory syndrome coronavirus 2]
MYSFVSEETGTLIVNSVLLFLAFVVFLLVTLAILTALRLCAYCCNIVNVSLVKPSFYVYS
RVKNLNSSRVPDLLV
>QNO31018.1 |envelope protein [Severe acute respiratory syndrome coronavirus 2]
MYSFVSEETGTLIVNSVLLFLAFVVFLLVTLAILTALRLCAYCCNIVNVSLVKPSFYVYS
RVKNLNSSRVPDLLV
>QNO31030.1 |envelope protein [Severe acute respiratory syndrome coronavirus 2]
MYSFVSEETGTLIVNSVLLFLAFVVFLLVTLAILTALRLCAYCCNIVNVSLVKPSFYVYS
RVKNLNSSRVPDLLV
>QNO31042.1 |envelope protein [Severe acute respiratory syndrome coronavirus 2]
MYSFVSEETGTLIVNSVLLFLAFVVFLLVTLAILTALRLCAYCCNIVNVSLVKPSFYVYS
RVKNLNSSRVPDLLV
>QNO31054.1 |envelope protein [Severe acute respiratory syndrome coronavirus 2]
MYSFVSEETGTLIVNSVLLFLAFVVFLLVTLAILTALRLCAYCCNIVNVSLVKPSFYVYS
RVKNLNSSRVPDLLV
>QNO31066.1 |envelope protein [Severe acute respiratory syndrome coronavirus 2]
MYSFVSEETGTLIVNSVLLFLAFVVFLLVTLAILTALRLCAYCCNIVNVSLVKPSFYVYS
RVKNLNSSRVPDLLV
>QNO31078.1 |envelope protein [Severe acute respiratory syndrome coronavirus 2]
MYSFVSEETGTLIVNSVLLFLAFVVFLLVTLAILTALRLCAYCCNIVNVSLVKPSFYVYS
RVKNLNSSRVPDLLV
>QNO31090.1 |envelope protein [Severe acute respiratory syndrome coronavirus 2]
MYSFVSEETGTLIVNSVLLFLAFVVFLLVTLAILTALRLCAYCCNIVNVSLVKPSFYVYS
RVKNLNSSRVPDLLV
>QNO31102.1 |envelope protein [Severe acute respiratory syndrome coronavirus 2]
MYSFVSEETGTLIVNSVLLFLAFVVFLLVTLAILTALRLCAYCCNIVNVSLVKPSFYVYS
RVKNLNSSRVPDLLV
>QNO31114.1 |envelope protein [Severe acute respiratory syndrome coronavirus 2]
MYSFVSEETGTLIVNSVLLFLAFVVFLLVTLAILTALRLCAYCCNIVNVSLVKPSFYVYS
RVKNLNSSRVPDLLV
>QNO31126.1 |envelope protein [Severe acute respiratory syndrome coronavirus 2]
MYSFVSEETGTLIVNSVLLFLAFVVFLLVTLAILTALRLCAYCCNIVNVSLVKPSFYVYS
RVKNLNSSRVPDLLV
>QNO31138.1 |envelope protein [Severe acute respiratory syndrome coronavirus 2]
MYSFVSEETGTLIVNSVLLFLAFVVFLLVTLAILTALRLCAYCCNIVNVSLVKPSFYVYS
RVKNLNSSRVPDLLV
>QNO31150.1 |envelope protein [Severe acute respiratory syndrome coronavirus 2]
MYSFVSEETGTLIVNSVLLFLAFVVFLLVTLAILTALRLCAYCCNIVNVSLVKPSFYVYS
RVKNLNSSRVPDLLV
>QNO31162.1 |envelope protein [Severe acute respiratory syndrome coronavirus 2]
MYSFVSEETGTLIVNSVLLFLAFVVFLLVTLAILTALRLCAYCCNIVNVSLVKPSFYVYS
RVKNLNSSRVPDLLV
>QNO31174.1 |envelope protein [Severe acute respiratory syndrome coronavirus 2]
MYSFVSEETGTLIVNSVLLFLAFVVFLLVTLAILTALRLCAYCCNIVNVSLVKPSFYVYS
RVKNLNSSRVPDLLV
>QNO31186.1 |envelope protein [Severe acute respiratory syndrome coronavirus 2]
MYSFVSEETGTLIVNSVLLFLAFVVFLLVTLAILTALRLCAYCCNIVNVSLVKPSFYVYS
RVKNLNSSRVPDLLV
>QNO31198.1 |envelope protein [Severe acute respiratory syndrome coronavirus 2]
MYSFVSEETGTLIVNSVLLFLAFVVFLLVTLAILTALRLCAYCCNIVNVSLVKPSFYVYS
RVKNLNSSRVPDLLV
>QNO31210.1 |envelope protein [Severe acute respiratory syndrome coronavirus 2]
MYSFVSEETGTLIVNSVLLFLAFVVFLLVTLAILTALRLCAYCCNIVNVSLVKPSFYVYS
RVKNLNSSRVPDLLV
>QNO31222.1 |envelope protein [Severe acute respiratory syndrome coronavirus 2]
MYSFVSEETGTLIVNSVLLFLAFVVFLLVTLAILTALRLCAYCCNIVNVSLVKPSFYVYS
RVKNLNSSRVPDLLV
>QNO31234.1 |envelope protein [Severe acute respiratory syndrome coronavirus 2]
MYSFVSEETGTLIVNSVLLFLAFVVFLLVTLAILTALRLCAYCCNIVNVSLVKPSFYVYS
RVKNLNSSRVPDLLV
>QNO31246.1 |envelope protein [Severe acute respiratory syndrome coronavirus 2]
MYSFVSEETGTLIVNSVLLFLAFVVFLLVTLAILTALRLCAYCCNIVNVSLVKPSFYVYS
RVKNLNSSRVPDLLV
>QNO31258.1 |envelope protein [Severe acute respiratory syndrome coronavirus 2]
MYSFVSEETGTLIVNSVLLFLAFVVFLLVTLAILTALRLCAYCCNIVNVSLVKPSFYVYS
RVKNLNSSRVPDLLV
>QNO31270.1 |envelope protein [Severe acute respiratory syndrome coronavirus 2]
MYSFVSEETGTLIVNSVLLFLAFVVFLLVTLAILTALRLCAYCCNIVNVSLVKPSFYVYS
RVKNLNSSRVPDLLV
>QNO31282.1 |envelope protein [Severe acute respiratory syndrome coronavirus 2]
MYSFVSEETGTLIVNSVLLFLAFVVFLLVTLAILTALRLCAYCCNIVNVSLVKPSFYVYS
RVKNLNSSRVPDLLV
>QNO31294.1 |envelope protein [Severe acute respiratory syndrome coronavirus 2]
MYSFVSEETGTLIVNSVLLFLAFVVFLLVTLAILTALRLCAYCCNIVNVSLVKPSFYVYS
RVKNLNSSRVPDLLV
>QNO31306.1 |envelope protein [Severe acute respiratory syndrome coronavirus 2]
MYSFVSEETGTLIVNSVLLFLAFVVFLLVTLAILTALRLCAYCCNIVNVSLVKPSFYVYS
RVKNLNSSRVPDLLV
>QNO31318.1 |envelope protein [Severe acute respiratory syndrome coronavirus 2]
MYSFVSEETGTLIVNSVLLFLAFVVFLLVTLAILTALRLCAYCCNIVNVSLVKPSFYVYS
RVKNLNSSRVPDLLV
>QNO31330.1 |envelope protein [Severe acute respiratory syndrome coronavirus 2]
MYSFVSEETGTLIVNSVLLFLAFVVFLLVTLAILTALRLCAYCCNIVNVSLVKPSFYVYS
RVKNLNSSRVPDLLV
>QNO31342.1 |envelope protein [Severe acute respiratory syndrome coronavirus 2]
MYSFVSEETGTLIVNSVLLFLAFVVFLLVTLAILTALRLCAYCCNIVNVSLVKPSFYVYS
RVKNLNSSRVPDLLV
>QNO31354.1 |envelope protein [Severe acute respiratory syndrome coronavirus 2]
MYSFVSEETGTLIVNSVLLFLAFVVFLLVTLAILTALRLCAYCCNIVNVSLVKPSFYVYS
RVKNLNSSRVPDLLV
>QNO31366.1 |envelope protein [Severe acute respiratory syndrome coronavirus 2]
MYSFVSEETGTLIVNSVLLFLAFVVFLLVTLAILTALRLCAYCCNIVNVSLVKPSFYVYS
RVKNLNSSRVPDLLV
>QNO31378.1 |envelope protein [Severe acute respiratory syndrome coronavirus 2]
MYSFVSEETGTLIVNSVLLFLAFVVFLLVTLAILTALRLCAYCCNIVNVSLVKPSFYVYS
RVKNLNSSRVPDLLV
>QNO31390.1 |envelope protein [Severe acute respiratory syndrome coronavirus 2]
MYSFVSEETGTLIVNSVLLFLAFVVFLLVTLAILTALRLCAYCCNIVNVSLVKPSFYVYS
RVKNLNSSRVPDLLV
>QNO31402.1 |envelope protein [Severe acute respiratory syndrome coronavirus 2]
MYSFVSEETGTLIVNSVLLFLAFVVFLLVTLAILTALRLCAYCCNIVNVSLVKPSFYVYS
RVKNLNSSRVPDLLV
>QNO31414.1 |envelope protein [Severe acute respiratory syndrome coronavirus 2]
MYSFVSEETGTLIVNSVLLFLAFVVFLLVTLAILTALRLCAYCCNIVNVSLVKPSFYVYS
RVKNLNSSRVPDLLV
>QNO31426.1 |envelope protein [Severe acute respiratory syndrome coronavirus 2]
MYSFVSEETGTLIVNSVLLFLAFVVFLLVTLAILTALRLCAYCCNIVNVSLVKPSFYVYS
RVKNLNSSRVPDLLV
>QNO31438.1 |envelope protein [Severe acute respiratory syndrome coronavirus 2]
MYSFVSEETGTLIVNSVLLFLAFVVFLLVTLAILTALRLCAYCCNIVNVSLVKPSFYVYS
RVKNLNSSRVPDLLV
>QNO31462.1 |envelope protein [Severe acute respiratory syndrome coronavirus 2]
MYSFVSEETGTLIVNSVLLFLAFVVFLLVTLAILTALRLCAYCCNIVNVSLVKPSFYVYS
RVKNLNSSRVPDLLV
>QNO31474.1 |envelope protein [Severe acute respiratory syndrome coronavirus 2]
MYSFVSEETGTLIVNSVLLFLAFVVFLLVTLAILTALRLCAYCCNIVNVSLVKPSFYVYS
RVKNLNSSRVPDLLV
>QNO31486.1 |envelope protein [Severe acute respiratory syndrome coronavirus 2]
MYSFVSEETGTLIVNSVLLFLAFVVFLLVTLAILTALRLCAYCCNIVNVSLVKPSFYVYS
RVKNLNSSRVPDLLV
>QNO31498.1 |envelope protein [Severe acute respiratory syndrome coronavirus 2]
MYSFVSEETGTLIVNSVLLFLAFVVFLLVTLAILTALRLCAYCCNIVNVSLVKPSFYVYS
RVKNLNSSRVPDLLV
>QNO31510.1 |envelope protein [Severe acute respiratory syndrome coronavirus 2]
MYSFVSEETGTLIVNSVLLFLAFVVFLLVTLAILTALRLCAYCCNIVNVSLVKPSFYVYS
RVKNLNSSRVPDLLV
>QNO31522.1 |envelope protein [Severe acute respiratory syndrome coronavirus 2]
MYSFVSEETGTLIVNSVLLFLAFVVFLLVTLAILTALRLCAYCCNIVNVSLVKPSFYVYS
RVKNLNSSRVPDLLV
>QNO31534.1 |envelope protein [Severe acute respiratory syndrome coronavirus 2]
MYSFVSEETGTLIVNSVLLFLAFVVFLLVTLAILTALRLCAYCCNIVNVSLVKPSFYVYS
RVKNLNSSRVPDLLV
>QNO31546.1 |envelope protein [Severe acute respiratory syndrome coronavirus 2]
MYSFVSEETGTLIVNSVLLFLAFVVFLLVTLAILTALRLCAYCCNIVNVSLVKPSFYVYS
RVKNLNSSRVPDLLV
>QNO31558.1 |envelope protein [Severe acute respiratory syndrome coronavirus 2]
MYSFVSEETGTLIVNSVLLFLAFVVFLLVTLAILTALRLCAYCCNIVNVSLVKPSFYVYS
RVKNLNSSRVPDLLV
>QNO31582.1 |envelope protein [Severe acute respiratory syndrome coronavirus 2]
MYSFVSEETGTLIVNSVLLFLAFVVFLLVTLAILTALRLCAYCCNIVNVSLVKPSFYVYS
RVKNLNSSRVPDLLV
>QNO31594.1 |envelope protein [Severe acute respiratory syndrome coronavirus 2]
MYSFVSEETGTLIVNSVLLFLAFVVFLLVTLAILTALRLCAYCCNIVNVSLVKPSFYVYS
RVKNLNSSRVPDLLV
>QNO31606.1 |envelope protein [Severe acute respiratory syndrome coronavirus 2]
MYSFVSEETGTLIVNSVLLFLAFVVFLLVTLAILTALRLCAYCCNIVNVSLVKPSFYVYS
RVKNLNSSRVPDLLV
>QNO31618.1 |envelope protein [Severe acute respiratory syndrome coronavirus 2]
MYSFVSEETGTLIVNSVLLFLAFVVFLLVTLAILTALRLCAYCCNIVNVSLVKPSFYVYS
RVKNLNSSRVPDLLV
>QNO31630.1 |envelope protein [Severe acute respiratory syndrome coronavirus 2]
MYSFVSEETGTLIVNSVLLFLAFVVFLLVTLAILTALRLCAYCCNIVNVSLVKPSFYVYS
RVKNLNSSRVPDLLV
>QNO31642.1 |envelope protein [Severe acute respiratory syndrome coronavirus 2]
MYSFVSEETGTLIVNSVLLFLAFVVFLLVTLAILTALRLCAYCCNIVNVSLVKPSFYVYS
RVKNLNSSRVPDLLV
>QNO31654.1 |envelope protein [Severe acute respiratory syndrome coronavirus 2]
MYSFVSEETGTLIVNSVLLFLAFVVFLLVTLAILTALRLCAYCCNIVNVSLVKPSFYVYS
RVKNLNSSRVPDLLV
>QNO31666.1 |envelope protein [Severe acute respiratory syndrome coronavirus 2]
MYSFVSEETGTLIVNSVLLFLAFVVFLLVTLAILTALRLCAYCCNIVNVSLVKPSFYVYS
RVKNLNSSRVPDLLV
>QNO31678.1 |envelope protein [Severe acute respiratory syndrome coronavirus 2]
MYSFVSEETGTLIVNSVLLFLAFVVFLLVTLAILTALRLCAYCCNIVNVSLVKPSFYVYS
RVKNLNSSRVPDLLV
>QNO31690.1 |envelope protein [Severe acute respiratory syndrome coronavirus 2]
MYSFVSEETGTLIVNSVLLFLAFVVFLLVTLAILTALRLCAYCCNIVNVSLVKPSFYVYS
RVKNLNSSRVPDLLV
>QNO31702.1 |envelope protein [Severe acute respiratory syndrome coronavirus 2]
MYSFVSEETGTLIVNSVLLFLAFVVFLLVTLAILTALRLCAYCCNIVNVSLVKPSFYVYS
RVKNLNSSRVPDLLV
>QNO31714.1 |envelope protein [Severe acute respiratory syndrome coronavirus 2]
MYSFVSEETGTLIVNSVLLFLAFVVFLLVTLAILTALRLCAYCCNIVNVSLVKPSFYVYS
RVKNLNSSRVPDLLV
>QNO31726.1 |envelope protein [Severe acute respiratory syndrome coronavirus 2]
MYSFVSEETGTLIVNSVLLFLAFVVFLLVTLAILTALRLCAYCCNIVNVSLVKPSFYVYS
RVKNLNSSRVPDLLV
>QNO31738.1 |envelope protein [Severe acute respiratory syndrome coronavirus 2]
MYSFVSEETGTLIVNSVLLFLAFVVFLLVTLAILTALRLCAYCCNIVNVSLVKPSFYVYS
RVKNLNSSRVPDLLV
>QNO31750.1 |envelope protein [Severe acute respiratory syndrome coronavirus 2]
MYSFVSEETGTLIVNSVLLFLAFVVFLLVTLAILTALRLCAYCCNIVNVSLVKPSFYVYS
RVKNLNSSRVPDLLV
>QNO31774.1 |envelope protein [Severe acute respiratory syndrome coronavirus 2]
MYSFVSEETGTLIVNSVLLFLAFVVFLLVTLAILTALRLCAYCCNIVNVSLVKPSFYVYS
RVKNLNSSRVPDLLV
>QNO31786.1 |envelope protein [Severe acute respiratory syndrome coronavirus 2]
MYSFVSEETGTLIVNSVLLFLAFVVFLLVTLAILTALRLCAYCCNIVNVSLVKPSFYVYS
RVKNLNSSRVPDLLV
>QNO31798.1 |envelope protein [Severe acute respiratory syndrome coronavirus 2]
MYSFVSEETGTLIVNSVLLFLAFVVFLLVTLAILTALRLCAYCCNIVNVSLVKPSFYVYS
RVKNLNSSRVPDLLV
>QNO31810.1 |envelope protein [Severe acute respiratory syndrome coronavirus 2]
MYSFVSEETGTLIVNSVLLFLAFVVFLLVTLAILTALRLCAYCCNIVNVSLVKPSFYVYS
RVKNLNSSRVPDLLV
>QNO31822.1 |envelope protein [Severe acute respiratory syndrome coronavirus 2]
MYSFVSEETGTLIVNSVLLFLAFVVFLLVTLAILTALRLCAYCCNIVNVSLVKPSFYVYS
RVKNLNSSRVPDLLV
>QNO31834.1 |envelope protein [Severe acute respiratory syndrome coronavirus 2]
MYSFVSEETGTLIVNSVLLFLAFVVFLLVTLAILTALRLCAYCCNIVNVSLVKPSFYVYS
RVKNLNSSRVPDLLV
>QNO31846.1 |envelope protein [Severe acute respiratory syndrome coronavirus 2]
MYSFVSEETGTLIVNSVLLFLAFVVFLLVTLAILTALRLCAYCCNIVNVSLVKPSFYVYS
RVKNLNSSRVPDLLV
>QNO31858.1 |envelope protein [Severe acute respiratory syndrome coronavirus 2]
MYSFVSEETGTLIVNSVLLFLAFVVFLLVTLAILTALRLCAYCCNIVNVSLVKPSFYVYS
RVKNLNSSRVPDLLV
>QNO31870.1 |envelope protein [Severe acute respiratory syndrome coronavirus 2]
MYSFVSEETGTLIVNSVLLFLAFVVFLLVTLAILTALRLCAYCCNIVNVSLVKPSFYVYS
RVKNLNSSRVPDLLV
>QNO31882.1 |envelope protein [Severe acute respiratory syndrome coronavirus 2]
MYSFVSEETGTLIVNSVLLFLAFVVFLLVTLAILTALRLCAYCCNIVNVSLVKPSFYVYS
RVKNLNSSRVPDLLV
>QNO31894.1 |envelope protein [Severe acute respiratory syndrome coronavirus 2]
MYSFVSEETGTLIVNSVLLFLAFVVFLLVTLAILTALRLCAYCCNIVNVSLVKPSFYVYS
RVKNLNSSRVPDLLV
>QNO31906.1 |envelope protein [Severe acute respiratory syndrome coronavirus 2]
MYSFVSEETGTLIVNSVLLFLAFVVFLLVTLAILTALRLCAYCCNIVNVSLVKPSFYVYS
RVKNLNSSRVPDLLV
>QNO31918.1 |envelope protein [Severe acute respiratory syndrome coronavirus 2]
MYSFVSEETGTLIVNSVLLFLAFVVFLLVTLAILTALRLCAYCCNIVNVSLVKPSFYVYS
RVKNLNSSRVPDLLV
>QNO31930.1 |envelope protein [Severe acute respiratory syndrome coronavirus 2]
MYSFVSEETGTLIVNSVLLFLAFVVFLLVTLAILTALRLCAYCCNIVNVSLVKPSFYVYS
RVKNLNSSRVPDLLV
>QNO31942.1 |envelope protein [Severe acute respiratory syndrome coronavirus 2]
MYSFVSEETGTLIVNSVLLFLAFVVFLLVTLAILTALRLCAYCCNIVNVSLVKPSFYVYS
RVKNLNSSRVPDLLV
>QNO31954.1 |envelope protein [Severe acute respiratory syndrome coronavirus 2]
MYSFVSEETGTLIVNSVLLFLAFVVFLLVTLAILTALRLCAYCCNIVNVSLVKPSFYVYS
RVKNLNSSRVPDLLV
>QNO31966.1 |envelope protein [Severe acute respiratory syndrome coronavirus 2]
MYSFVSEETGTLIVNSVLLFLAFVVFLLVTLAILTALRLCAYCCNIVNVSLVKPSFYVYS
RVKNLNSSRVPDLLV
>QNO31978.1 |envelope protein [Severe acute respiratory syndrome coronavirus 2]
MYSFVSEETGTLIVNSVLLFLAFVVFLLVTLAILTALRLCAYCCNIVNVSLVKPSFYVYS
RVKNLNSSRVPDLLV
>QNO31990.1 |envelope protein [Severe acute respiratory syndrome coronavirus 2]
MYSFVSEETGTLIVNSVLLFLAFVVFLLVTLAILTALRLCAYCCNIVNVSLVKPSFYVYS
RVKNLNSSRVPDLLV
>QNO32002.1 |envelope protein [Severe acute respiratory syndrome coronavirus 2]
MYSFVSEETGTLIVNSVLLFLAFVVFLLVTLAILTALRLCAYCCNIVNVSLVKPSFYVYS
RVKNLNSSRVPDLLV
>QNO32014.1 |envelope protein [Severe acute respiratory syndrome coronavirus 2]
MYSFVSEETGTLIVNSVLLFLAFVVFLLVTLAILTALRLCAYCCNIVNVSLVKPSFYVYS
RVKNLNSSRVPDLLV
>QNO32026.1 |envelope protein [Severe acute respiratory syndrome coronavirus 2]
MYSFVSEETGTLIVNSVLLFLAFVVFLLVTLAILTALRLCAYCCNIVNVSLVKPSFYVYS
RVKNLNSSRVPDLLV
>QNO32038.1 |envelope protein [Severe acute respiratory syndrome coronavirus 2]
MYSFVSEETGTLIVNSVLLFLAFVVFLLVTLAILTALRLCAYCCNIVNVSLVKPSFYVYS
RVKNLNSSRVPDLLV
>QNO32050.1 |envelope protein [Severe acute respiratory syndrome coronavirus 2]
MYSFVSEETGTLIVNSVLLFLAFVVFLLVTLAILTALRLCAYCCNIVNVSLVKPSFYVYS
RVKNLNSSRVPDLLV
>QNO32062.1 |envelope protein [Severe acute respiratory syndrome coronavirus 2]
MYSFVSEETGTLIVNSVLLFLAFVVFLLVTLAILTALRLCAYCCNIVNVSLVKPSFYVYS
RVKNLNSSRVPDLLV
>QNO32074.1 |envelope protein [Severe acute respiratory syndrome coronavirus 2]
MYSFVSEETGTLIVNSVLLFLAFVVFLLVTLAILTALRLCAYCCNIVNVSLVKPSFYVYS
RVKNLNSSRVPDLLV
>QNO32086.1 |envelope protein [Severe acute respiratory syndrome coronavirus 2]
MYSFVSEETGTLIVNSVLLFLAFVVFLLVTLAILTALRLCAYCCNIVNVSLVKPSFYVYS
RVKNLNSSRVPDLLV
>QNO32098.1 |envelope protein [Severe acute respiratory syndrome coronavirus 2]
MYSFVSEETGTLIVNSVLLFLAFVVFLLVTLAILTALRLCAYCCNIVNVSLVKPSFYVYS
RVKNLNSSRVPDLLV
>QNO32110.1 |envelope protein [Severe acute respiratory syndrome coronavirus 2]
MYSFVSEETGTLIVNSVLLFLAFVVFLLVTLAILTALRLCAYCCNIVNVSLVKPSFYVYS
RVKNLNSSRVPDLLV
>QNO32122.1 |envelope protein [Severe acute respiratory syndrome coronavirus 2]
MYSFVSEETGTLIVNSVLLFLAFVVFLLVTLAILTALRLCAYCCNIVNVSLVKPSFYVYS
RVKNLNSSRVPDLLV
>QNO32134.1 |envelope protein [Severe acute respiratory syndrome coronavirus 2]
MYSFVSEETGTLIVNSVLLFLAFVVFLLVTLAILTALRLCAYCCNIVNVSLVKPSFYVYS
RVKNLNSSRVPDLLV
>QNO32146.1 |envelope protein [Severe acute respiratory syndrome coronavirus 2]
MYSFVSEETGTLIVNSVLLFLAFVVFLLVTLAILTALRLCAYCCNIVNVSLVKPSFYVYS
RVKNLNSSRVPDLLV
>QNO32158.1 |envelope protein [Severe acute respiratory syndrome coronavirus 2]
MYSFVSEETGTLIVNSVLLFLAFVVFLLVTLAILTALRLCAYCCNIVNVSLVKPSFYVYS
RVKNLNSSRVPDLLV
>QNO32170.1 |envelope protein [Severe acute respiratory syndrome coronavirus 2]
MYSFVSEETGTLIVNSVLLFLAFVVFLLVTLAILTALRLCAYCCNIVNVSLVKPSFYVYS
RVKNLNSSRVPDLLV
>QNO32182.1 |envelope protein [Severe acute respiratory syndrome coronavirus 2]
MYSFVSEETGTLIVNSVLLFLAFVVFLLVTLAILTALRLCAYCCNIVNVSLVKPSFYVYS
RVKNLNSSRVPDLLV
>QNO32194.1 |envelope protein [Severe acute respiratory syndrome coronavirus 2]
MYSFVSEETGTLIVNSVLLFLAFVVFLLVTLAILTALRLCAYCCNIVNVSLVKPSFYVYS
RVKNLNSSRVPDLLV
>QNO32206.1 |envelope protein [Severe acute respiratory syndrome coronavirus 2]
MYSFVSEETGTLIVNSVLLFLAFVVFLLVTLAILTALRLCAYCCNIVNVSLVKPSFYVYS
RVKNLNSSRVPDLLV
>QNO32218.1 |envelope protein [Severe acute respiratory syndrome coronavirus 2]
MYSFVSEETGTLIVNSVLLFLAFVVFLLVTLAILTALRLCAYCCNIVNVSLVKPSFYVYS
RVKNLNSSRVPDLLV
>QNO32230.1 |envelope protein [Severe acute respiratory syndrome coronavirus 2]
MYSFVSEETGTLIVNSVLLFLAFVVFLLVTLAILTALRLCAYCCNIVNVSLVKPSFYVYS
RVKNLNSSRVPDLLV
>QNO32242.1 |envelope protein [Severe acute respiratory syndrome coronavirus 2]
MYSFVSEETGTLIVNSVLLFLAFVVFLLVTLAILTALRLCAYCCNIVNVSLVKPSFYVYS
RVKNLNSSRVPDLLV
>QNO32254.1 |envelope protein [Severe acute respiratory syndrome coronavirus 2]
MYSFVSEETGTLIVNSVLLFLAFVVFLLVTLAILTALRLCAYCCNIVNVSLVKPSFYVYS
RVKNLNSSRVPDLLV
>QNO32266.1 |envelope protein [Severe acute respiratory syndrome coronavirus 2]
MYSFVSEETGTLIVNSVLLFLAFVVFLLVTLAILTALRLCAYCCNIVNVSLVKPSFYVYS
RVKNLNSSRVPDLLV
>QNO32278.1 |envelope protein [Severe acute respiratory syndrome coronavirus 2]
MYSFVSEETGTLIVNSVLLFLAFVVFLLVTLAILTALRLCAYCCNIVNVSLVKPSFYVYS
RVKNLNSSRVPDLLV
>QNO32302.1 |envelope protein [Severe acute respiratory syndrome coronavirus 2]
MYSFVSEETGTLIVNSVLLFLAFVVFLLVTLAILTALRLCAYCCNIVNVSLVKPSFYVYS
RVKNLNSSRVPDLLV
>QNO32314.1 |envelope protein [Severe acute respiratory syndrome coronavirus 2]
MYSFVSEETGTLIVNSVLLFLAFVVFLLVTLAILTALRLCAYCCNIVNVSLVKPSFYVYS
RVKNLNSSRVPDLLV
>QNO32326.1 |envelope protein [Severe acute respiratory syndrome coronavirus 2]
MYSFVSEETGTLIVNSVLLFLAFVVFLLVTLAILTALRLCAYCCNIVNVSLVKPSFYVYS
RVKNLNSSRVPDLLV
>QNO32338.1 |envelope protein [Severe acute respiratory syndrome coronavirus 2]
MYSFVSEETGTLIVNSVLLFLAFVVFLLVTLAILTALRLCAYCCNIVNVSLVKPSFYVYS
RVKNLNSSRVPDLLV
>QNO32350.1 |envelope protein [Severe acute respiratory syndrome coronavirus 2]
MYSFVSEETGTLIVNSVLLFLAFVVFLLVTLAILTALRLCAYCCNIVNVSLVKPSFYVYS
RVKNLNSSRVPDLLV
>QNO32362.1 |envelope protein [Severe acute respiratory syndrome coronavirus 2]
MYSFVSEETGTLIVNSVLLFLAFVVFLLVTLAILTALRLCAYCCNIVNVSLVKPSFYVYS
RVKNLNSSRVPDLLV
>QNO32374.1 |envelope protein [Severe acute respiratory syndrome coronavirus 2]
MYSFVSEETGTLIVNSVLLFLAFVVFLLVTLAILTALRLCAYCCNIVNVSLVKPSFYVYS
RVKNLNSSRVPDLLV
>QNO32386.1 |envelope protein [Severe acute respiratory syndrome coronavirus 2]
MYSFVSEETGTLIVNSVLLFLAFVVFLLVTLAILTALRLCAYCCNIVNVSLVKPSFYVYS
RVKNLNSSRVPDLLV
>QNO32398.1 |envelope protein [Severe acute respiratory syndrome coronavirus 2]
MYSFVSEETGTLIVNSVLLFLAFVVFLLVTLAILTALRLCAYCCNIVNVSLVKPSFYVYS
RVKNLNSSRVPDLLV
>QNO32410.1 |envelope protein [Severe acute respiratory syndrome coronavirus 2]
MYSFVSEETGTLIVNSVLLFLAFVVFLLVTLAILTALRLCAYCCNIVNVSLVKPSFYVYS
RVKNLNSSRVPDLLV
>QNO32422.1 |envelope protein [Severe acute respiratory syndrome coronavirus 2]
MYSFVSEETGTLIVNSVLLFLAFVVFLLVTLAILTALRLCAYCCNIVNVSLVKPSFYVYS
RVKNLNSSRVPDLLV
>QNO32434.1 |envelope protein [Severe acute respiratory syndrome coronavirus 2]
MYSFVSEETGTLIVNSVLLFLAFVVFLLVTLAILTALRLCAYCCNIVNVSLVKPSFYVYS
RVKNLNSSRVPDLLV
>QNO32446.1 |envelope protein [Severe acute respiratory syndrome coronavirus 2]
MYSFVSEETGTLIVNSVLLFLAFVVFLLVTLAILTALRLCAYCCNIVNVSLVKPSFYVYS
RVKNLNSSRVPDLLV
>QNO32458.1 |envelope protein [Severe acute respiratory syndrome coronavirus 2]
MYSFVSEETGTLIVNSVLLFLAFVVFLLVTLAILTALRLCAYCCNIVNVSLVKPSFYVYS
RVKNLNSSRVPDLLV
>QNO32470.1 |envelope protein [Severe acute respiratory syndrome coronavirus 2]
MYSFVSEETGTLIVNSVLLFLAFVVFLLVTLAILTALRLCAYCCNIVNVSLVKPSFYVYS
RVKNLNSSRVPDLLV
>QNO32482.1 |envelope protein [Severe acute respiratory syndrome coronavirus 2]
MYSFVSEETGTLIVNSVLLFLAFVVFLLVTLAILTALRLCAYCCNIVNVSLVKPSFYVYS
RVKNLNSSRVPDLLV
>QNO32494.1 |envelope protein [Severe acute respiratory syndrome coronavirus 2]
MYSFVSEETGTLIVNSVLLFLAFVVFLLVTLAILTALRLCAYCCNIVNVSLVKPSFYVYS
RVKNLNSSRVPDLLV
>QNO32506.1 |envelope protein [Severe acute respiratory syndrome coronavirus 2]
MYSFVSEETGTLIVNSVLLFLAFVVFLLVTLAILTALRLCAYCCNIVNVSLVKPSFYVYS
RVKNLNSSRVPDLLV
>QNO32518.1 |envelope protein [Severe acute respiratory syndrome coronavirus 2]
MYSFVSEETGTLIVNSVLLFLAFVVFLLVTLAILTALRLCAYCCNIVNVSLVKPSFYVYS
RVKNLNSSRVPDLLV
>QNO32530.1 |envelope protein [Severe acute respiratory syndrome coronavirus 2]
MYSFVSEETGTLIVNSVLLFLAFVVFLLVTLAILTALRLCAYCCNIVNVSLVKPSFYVYS
RVKNLNSSRVPDLLV
>QNO32542.1 |envelope protein [Severe acute respiratory syndrome coronavirus 2]
MYSFVSEETGTLIVNSVLLFLAFVVFLLVTLAILTALRLCAYCCNIVNVSLVKPSFYVYS
RVKNLNSSRVPDLLV
>QNO32554.1 |envelope protein [Severe acute respiratory syndrome coronavirus 2]
MYSFVSEETGTLIVNSVLLFLAFVVFLLVTLAILTALRLCAYCCNIVNVSLVKPSFYVYS
RVKNLNSSRVPDLLV
>QNO32566.1 |envelope protein [Severe acute respiratory syndrome coronavirus 2]
MYSFVSEETGTLIVNSVLLFLAFVVFLLVTLAILTALRLCAYCCNIVNVSLVKPSFYVYS
RVKNLNSSRVPDLLV
>QNO32578.1 |envelope protein [Severe acute respiratory syndrome coronavirus 2]
MYSFVSEETGTLIVNSVLLFLAFVVFLLVTLAILTALRLCAYCCNIVNVSLVKPSFYVYS
RVKNLNSSRVPDLLV
>QNO32590.1 |envelope protein [Severe acute respiratory syndrome coronavirus 2]
MYSFVSEETGTLIVNSVLLFLAFVVFLLVTLAILTALRLCAYCCNIVNVSLVKPSFYVYS
RVKNLNSSRVPDLLV
>QNO32602.1 |envelope protein [Severe acute respiratory syndrome coronavirus 2]
MYSFVSEETGTLIVNSVLLFLAFVVFLLVTLAILTALRLCAYCCNIVNVSLVKPSFYVYS
RVKNLNSSRVPDLLV
>QNO32614.1 |envelope protein [Severe acute respiratory syndrome coronavirus 2]
MYSFVSEETGTLIVNSVLLFLAFVVFLLVTLAILTALRLCAYCCNIVNVSLVKPSFYVYS
RVKNLNSSRVPDLLV
>QNO32626.1 |envelope protein [Severe acute respiratory syndrome coronavirus 2]
MYSFVSEETGTLIVNSVLLFLAFVVFLLVTLAILTALRLCAYCCNIVNVSLVKPSFYVYS
RVKNLNSSRVPDLLV
>QNO32638.1 |envelope protein [Severe acute respiratory syndrome coronavirus 2]
MYSFVSEETGTLIVNSVLLFLAFVVFLLVTLAILTALRLCAYCCNIVNVSLVKPSFYVYS
RVKNLNSSRVPDLLV
>QNO32650.1 |envelope protein [Severe acute respiratory syndrome coronavirus 2]
MYSFVSEETGTLIVNSVLLFLAFVVFLLVTLAILTALRLCAYCCNIVNVSLVKPSFYVYS
RVKNLNSSRVPDLLV
>QNO32662.1 |envelope protein [Severe acute respiratory syndrome coronavirus 2]
MYSFVSEETGTLIVNSVLLFLAFVVFLLVTLAILTALRLCAYCCNIVNVSLVKPSFYVYS
RVKNLNSSRVPDLLV
>QNO32674.1 |envelope protein [Severe acute respiratory syndrome coronavirus 2]
MYSFVSEETGTLIVNSVLLFLAFVVFLLVTLAILTALRLCAYCCNIVNVSLVKPSFYVYS
RVKNLNSSRVPDLLV
>QNO32686.1 |envelope protein [Severe acute respiratory syndrome coronavirus 2]
MYSFVSEETGTLIVNSVLLFLAFVVFLLVTLAILTALRLCAYCCNIVNVSLVKPSFYVYS
RVKNLNSSRVPDLLV
>QNO32698.1 |envelope protein [Severe acute respiratory syndrome coronavirus 2]
MYSFVSEETGTLIVNSVLLFLAFVVFLLVTLAILTALRLCAYCCNIVNVSLVKPSFYVYS
RVKNLNSSRVPDLLV
>QNO32710.1 |envelope protein [Severe acute respiratory syndrome coronavirus 2]
MYSFVSEETGTLIVNSVLLFLAFVVFLLVTLAILTALRLCAYCCNIVNVSLVKPSFYVYS
RVKNLNSSRVPDLLV
>QNO32722.1 |envelope protein [Severe acute respiratory syndrome coronavirus 2]
MYSFVSEETGTLIVNSVLLFLAFVVFLLVTLAILTALRLCAYCCNIVNVSLVKPSFYVYS
RVKNLNSSRVPDLLV
>QNO32734.1 |envelope protein [Severe acute respiratory syndrome coronavirus 2]
MYSFVSEETGTLIVNSVLLFLAFVVFLLVTLAILTALRLCAYCCNIVNVSLVKPSFYVYS
RVKNLNSSRVPDLLV
>QNO32746.1 |envelope protein [Severe acute respiratory syndrome coronavirus 2]
MYSFVSEETGTLIVNSVLLFLAFVVFLLVTLAILTALRLCAYCCNIVNVSLVKPSFYVYS
RVKNLNSSRVPDLLV
>QNO32758.1 |envelope protein [Severe acute respiratory syndrome coronavirus 2]
MYSFVSEETGTLIVNSVLLFLAFVVFLLVTLAILTALRLCAYCCNIVNVSLVKPSFYVYS
RVKNLNSSRVPDLLV
>QNO32770.1 |envelope protein [Severe acute respiratory syndrome coronavirus 2]
MYSFVSEETGTLIVNSVLLFLAFVVFLLVTLAILTALRLCAYCCNIVNVSLVKPSFYVYS
RVKNLNSSRVPDLLV
>QNO32782.1 |envelope protein [Severe acute respiratory syndrome coronavirus 2]
MYSFVSEETGTLIVNSVLLFLAFVVFLLVTLAILTALRLCAYCCNIVNVSLVKPSFYVYS
RVKNLNSSRVPDLLV
>QNO32794.1 |envelope protein [Severe acute respiratory syndrome coronavirus 2]
MYSFVSEETGTLIVNSVLLFLAFVVFLLVTLAILTALRLCAYCCNIVNVSLVKPSFYVYS
RVKNLNSSRVPDLLV
>QNO32806.1 |envelope protein [Severe acute respiratory syndrome coronavirus 2]
MYSFVSEETGTLIVNSVLLFLAFVVFLLVTLAILTALRLCAYCCNIVNVSLVKPSFYVYS
RVKNLNSSRVPDLLV
>QNO32818.1 |envelope protein [Severe acute respiratory syndrome coronavirus 2]
MYSFVSEETGTLIVNSVLLFLAFVVFLLVTLAILTALRLCAYCCNIVNVSLVKPSFYVYS
RVKNLNSSRVPDLLV
>QNO32830.1 |envelope protein [Severe acute respiratory syndrome coronavirus 2]
MYSFVSEETGTLIVNSVLLFLAFVVFLLVTLAILTALRLCAYCCNIVNVSLVKPSFYVYS
RVKNLNSSRVPDLLV
>QNO32842.1 |envelope protein [Severe acute respiratory syndrome coronavirus 2]
MYSFVSEETGTLIVNSVLLFLAFVVFLLVTLAILTALRLCAYCCNIVNVSLVKPSFYVYS
RVKNLNSSRVPDLLV
>QNO32854.1 |envelope protein [Severe acute respiratory syndrome coronavirus 2]
MYSFVSEETGTLIVNSVLLFLAFVVFLLVTLAILTALRLCAYCCNIVNVSLVKPSFYVYS
RVKNLNSSRVPDLLV
>QNO32866.1 |envelope protein [Severe acute respiratory syndrome coronavirus 2]
MYSFVSEETGTLIVNSVLLFLAFVVFLLVTLAILTALRLCAYCCNIVNVSLVKPSFYVYS
RVKNLNSSRVPDLLV
>QNO32878.1 |envelope protein [Severe acute respiratory syndrome coronavirus 2]
MYSFVSEETGTLIVNSVLLFLAFVVFLLVTLAILTALRLCAYCCNIVNVSLVKPSFYVYS
RVKNLNSSRVPDLLV
>QNO32890.1 |envelope protein [Severe acute respiratory syndrome coronavirus 2]
MYSFVSEETGTLIVNSVLLFLAFVVFLLVTLAILTALRLCAYCCNIVNVSLVKPSFYVYS
RVKNLNSSRVPDLLV
>QNO32902.1 |envelope protein [Severe acute respiratory syndrome coronavirus 2]
MYSFVSEETGTLIVNSVLLFLAFVVFLLVTLAILTALRLCAYCCNIVNVSLVKPSFYVYS
RVKNLNSSRVPDLLV
>QNO32914.1 |envelope protein [Severe acute respiratory syndrome coronavirus 2]
MYSFVSEETGTLIVNSVLLFLAFVVFLLVTLAILTALRLCAYCCNIVNVSLVKPSFYVYS
RVKNLNSSRVPDLLV
>QNO32926.1 |envelope protein [Severe acute respiratory syndrome coronavirus 2]
MYSFVSEETGTLIVNSVLLFLAFVVFLLVTLAILTALRLCAYCCNIVNVSLVKPSFYVYS
RVKNLNSSRVPDLLV
>QNO32938.1 |envelope protein [Severe acute respiratory syndrome coronavirus 2]
MYSFVSEETGTLIVNSVLLFLAFVVFLLVTLAILTALRLCAYCCNIVNVSLVKPSFYVYS
RVKNLNSSRVPDLLV
>QNO32950.1 |envelope protein [Severe acute respiratory syndrome coronavirus 2]
MYSFVSEETGTLIVNSVLLFLAFVVFLLVTLAILTALRLCAYCCNIVNVSLVKPSFYVYS
RVKNLNSSRVPDLLV
>QNO32962.1 |envelope protein [Severe acute respiratory syndrome coronavirus 2]
MYSFVSEETGTLIVNSVLLFLAFVVFLLVTLAILTALRLCAYCCNIVNVSLVKPSFYVYS
RVKNLNSSRVPDLLV
>QNO32974.1 |envelope protein [Severe acute respiratory syndrome coronavirus 2]
MYSFVSEETGTLIVNSVLLFLAFVVFLLVTLAILTALRLCAYCCNIVNVSLVKPSFYVYS
RVKNLNSSRVPDLLV
>QNO32986.1 |envelope protein [Severe acute respiratory syndrome coronavirus 2]
MYSFVSEETGTLIVNSVLLFLAFVVFLLVTLAILTALRLCAYCCNIVNVSLVKPSFYVYS
RVKNLNSSRVPDLLV
>QNO32998.1 |envelope protein [Severe acute respiratory syndrome coronavirus 2]
MYSFVSEETGTLIVNSVLLFLAFVVFLLVTLAILTALRLCAYCCNIVNVSLVKPSFYVYS
RVKNLNSSRVPDLLV
>QNO33010.1 |envelope protein [Severe acute respiratory syndrome coronavirus 2]
MYSFVSEETGTLIVNSVLLFLAFVVFLLVTLAILTALRLCAYCCNIVNVSLVKPSFYVYS
RVKNLNSSRVPDLLV
>QNO33022.1 |envelope protein [Severe acute respiratory syndrome coronavirus 2]
MYSFVSEETGTLIVNSVLLFLAFVVFLLVTLAILTALRLCAYCCNIVNVSLVKPSFYVYS
RVKNLNSSRVPDLLV
>QNO33034.1 |envelope protein [Severe acute respiratory syndrome coronavirus 2]
MYSFVSEETGTLIVNSVLLFLAFVVFLLVTLAILTALRLCAYCCNIVNVSLVKPSFYVYS
RVKNLNSSRVPDLLV
>QNO33046.1 |envelope protein [Severe acute respiratory syndrome coronavirus 2]
MYSFVSEETGTLIVNSVLLFLAFVVFLLVTLAILTALRLCAYCCNIVNVSLVKPSFYVYS
RVKNLNSSRVPDLLV
>QNO33058.1 |envelope protein [Severe acute respiratory syndrome coronavirus 2]
MYSFVSEETGTLIVNSVLLFLAFVVFLLVTLAILTALRLCAYCCNIVNVSLVKPSFYVYS
RVKNLNSSRVPDLLV
>QNO33070.1 |envelope protein [Severe acute respiratory syndrome coronavirus 2]
MYSFVSEETGTLIVNSVLLFLAFVVFLLVTLAILTALRLCAYCCNIVNVSLVKPSFYVYS
RVKNLNSSRVPDLLV
>QNO33082.1 |envelope protein [Severe acute respiratory syndrome coronavirus 2]
MYSFVSEETGTLIVNSVLLFLAFVVFLLVTLAILTALRLCAYCCNIVNVSLVKPSFYVYS
RVKNLNSSRVPDLLV
>QNO33094.1 |envelope protein [Severe acute respiratory syndrome coronavirus 2]
MYSFVSEETGTLIVNSVLLFLAFVVFLLVTLAILTALRLCAYCCNIVNVSLVKPSFYVYS
RVKNLNSSRVPDLLV
>QNO33106.1 |envelope protein [Severe acute respiratory syndrome coronavirus 2]
MYSFVSEETGTLIVNSVLLFLAFVVFLLVTLAILTALRLCAYCCNIVNVSLVKPSFYVYS
RVKNLNSSRVPDLLV
>QNO33118.1 |envelope protein [Severe acute respiratory syndrome coronavirus 2]
MYSFVSEETGTLIVNSVLLFLAFVVFLLVTLAILTALRLCAYCCNIVNVSLVKPSFYVYS
RVKNLNSSRVPDLLV
>QNO33130.1 |envelope protein [Severe acute respiratory syndrome coronavirus 2]
MYSFVSEETGTLIVNSVLLFLAFVVFLLVTLAILTALRLCAYCCNIVNVSLVKPSFYVYS
RVKNLNSSRVPDLLV
>QNO33142.1 |envelope protein [Severe acute respiratory syndrome coronavirus 2]
MYSFVSEETGTLIVNSVLLFLAFVVFLLVTLAILTALRLCAYCCNIVNVSLVKPSFYVYS
RVKNLNSSRVPDLLV
>QNO33154.1 |envelope protein [Severe acute respiratory syndrome coronavirus 2]
MYSFVSEETGTLIVNSVLLFLAFVVFLLVTLAILTALRLCAYCCNIVNVSLVKPSFYVYS
RVKNLNSSRVPDLLV
>QNO33166.1 |envelope protein [Severe acute respiratory syndrome coronavirus 2]
MYSFVSEETGTLIVNSVLLFLAFVVFLLVTLAILTALRLCAYCCNIVNVSLVKPSFYVYS
RVKNLNSSRVPDLLV
>QNO33178.1 |envelope protein [Severe acute respiratory syndrome coronavirus 2]
MYSFVSEETGTLIVNSVLLFLAFVVFLLVTLAILTALRLCAYCCNIVNVSLVKPSFYVYS
RVKNLNSSRVPDLLV
>QNO33190.1 |envelope protein [Severe acute respiratory syndrome coronavirus 2]
MYSFVSEETGTLIVNSVLLFLAFVVFLLVTLAILTALRLCAYCCNIVNVSLVKPSFYVYS
RVKNLNSSRVPDLLV
>QNO39543.1 |envelope protein [Severe acute respiratory syndrome coronavirus 2]
MYSFVSEETGTLIVNSVLLFLAFVVFLLVTLAILTALRLCAYCCNIVNVSLVKPSFYVYS
RVKNLNSSRVPDLLV
>QNO39555.1 |envelope protein [Severe acute respiratory syndrome coronavirus 2]
MYSFVSEETGTLIVNSVLLFLAFVVFLLVTLAILTALRLCAYCCNIVNVSLVKPSFYVYS
RVKNLNSSRVPDLLV
>QNO39567.1 |envelope protein [Severe acute respiratory syndrome coronavirus 2]
MYSFVSEETGTLIVNSVLLFLAFVVFLLVTLAILTALRLCAYCCNIVNVSLVKPSFYVYS
RVKNLNSSRVPDLLV
>QNO39579.1 |envelope protein [Severe acute respiratory syndrome coronavirus 2]
MYSFVSEETGTLIVNSVLLFLAFVVFLLVTLAILTALRLCAYCCNIVNVSLVKPSFYVYS
RVKNLNSSRVPDLLV
>QNO39591.1 |envelope protein [Severe acute respiratory syndrome coronavirus 2]
MYSFVSEETGTLIVNSVLLFLAFVVFLLVTLAILTALRLCAYCCNIVNVSLVKPSFYVYS
RVKNLNSSRVPDLLV
>QNO39603.1 |envelope protein [Severe acute respiratory syndrome coronavirus 2]
MYSFVSEETGTLIVNSVLLFLAFVVFLLVTLAILTALRLCAYCCNIVNVSLVKPSFYVYS
RVKNLNSSRVPDLLV
>QNO39615.1 |envelope protein [Severe acute respiratory syndrome coronavirus 2]
MYSFVSEETGTLIVNSVLLFLAFVVFLLVTLAILTALRLCAYCCNIVNVSLVKPSFYVYS
RVKNLNSSRVPDLLV
>QNO39627.1 |envelope protein [Severe acute respiratory syndrome coronavirus 2]
MYSFVSEETGTLIVNSVLLFLAFVVFLLVTLAILTALRLCAYCCNIVNVSLVKPSFYVYS
RVKNLNSSRVPDLLV
>QNO39639.1 |envelope protein [Severe acute respiratory syndrome coronavirus 2]
MYSFVSEETGTLIVNSVLLFLAFVVFLLVTLAILTALRLCAYCCNIVNVSLVKPSFYVYS
RVKNLNSSRVPDLLV
>QNO39651.1 |envelope protein [Severe acute respiratory syndrome coronavirus 2]
MYSFVSEETGTLIVNSVLLFLAFVVFLLVTLAILTALRLCAYCCNIVNVSLVKPSFYVYS
RVKNLNSSRVPDLLV
>QNO39663.1 |envelope protein [Severe acute respiratory syndrome coronavirus 2]
MYSFVSEETGTLIVNSVLLFLAFVVFLLVTLAILTALRLCAYCCNIVNVSLVKPSFYVYS
RVKNLNSSRVPDFLV
>QNO39675.1 |envelope protein [Severe acute respiratory syndrome coronavirus 2]
MYSFVSEETGTLIVNSVLLFLAFVVFLLVTLAILTALRLCAYCCNIVNVSLVKPSFYVYS
RVKNLNSSRVPDLLV
>QNO39687.1 |envelope protein [Severe acute respiratory syndrome coronavirus 2]
MYSFVSEETGTLIVNSVLLFLAFVVFLLVTLAILTALRLCAYCCNIVNVSLVKPSFYVYS
RVKNLNSSRVPDLLV
>QNO39699.1 |envelope protein [Severe acute respiratory syndrome coronavirus 2]
MYSFVSEETGTLIVNSVLLFLAFVVFLLVTLAILTALRLCAYCCNIVNVSLVKPSFYVYS
RVKNLNSSRVPDLLV
>QNO39711.1 |envelope protein [Severe acute respiratory syndrome coronavirus 2]
MYSFVSEETGTLIVNSVLLFLAFVVFLLVTLAILTALRLCAYCCNIVNVSLVKPSFYVYS
RVKNLNSSRVPDLLV
>QNO39723.1 |envelope protein [Severe acute respiratory syndrome coronavirus 2]
MYSFVSEETGTLIVNSVLLFLAFVVFLLVTLAILTALRLCAYCCNIVNVSLVKPSFYVYS
RVKNLNSSRVPDLLV
>QNO39735.1 |envelope protein [Severe acute respiratory syndrome coronavirus 2]
MYSFVSEETGTLIVNSVLLFLAFVVFLLVTLAILTALRLCAYCCNIVNVSLVKPSFYVYS
RVKNLNSSRVPDLLV
>QNO39747.1 |envelope protein [Severe acute respiratory syndrome coronavirus 2]
MYSFVSEETGTLIVNSVLLFLAFVVFLLVTLAILTALRLCAYCCNIVNVSLVKPSFYVYS
RVKNLNSSRVPDLLV
>QNO39759.1 |envelope protein [Severe acute respiratory syndrome coronavirus 2]
MYSFVSEETGTLIVNSVLLFLAFVVFLLVTLAILTALRLCAYCCNIVNVSLVKPSFYVYS
RVKNLNSSRVPDLLV
>QNO39771.1 |envelope protein [Severe acute respiratory syndrome coronavirus 2]
MYSFVSEETGTLIVNSVLLFLAFVVFLLVTLAILTALRLCAYCCNIVNVSLVKPSFYVYS
RVKNLNSSRVPDLLV
>QNO39783.1 |envelope protein [Severe acute respiratory syndrome coronavirus 2]
MYSFVSEETGTLIVNSVLLFLAFVVFLLVTLAILTALRLCAYCCNIVNVSLVKPSFYVYS
RVKNLNSSRVPDLLV
>QNO39795.1 |envelope protein [Severe acute respiratory syndrome coronavirus 2]
MYSFVSEETGTLIVNSVLLFLAFVVFLLVTLAILTALRLCAYCCNIVNVSLVKPSFYVYS
RVKNLNSSRVPDLLV
>QNO39807.1 |envelope protein [Severe acute respiratory syndrome coronavirus 2]
MYSFVSEETGTLIVNSVLLFLAFVVFLLVTLAILTALRLCAYCCNIVNVSLVKPSFYVYS
RVKNLNSSRVPDLLV
>QNO39819.1 |envelope protein [Severe acute respiratory syndrome coronavirus 2]
MYSFVSEETGTLIVNSVLLFLAFVVFLLVTLAILTALRLCAYCCNIVNVSLVKPSFYVYS
RVKNLNSSRVPDLLV
>QNO39831.1 |envelope protein [Severe acute respiratory syndrome coronavirus 2]
MYSFVSEETGTLIVNSVLLFLAFVVFLLVTLAILTALRLCAYCCNIVNVSLVKPSFYVYS
RVKNLNSSRVPDLLV
>QNO39843.1 |envelope protein [Severe acute respiratory syndrome coronavirus 2]
MYSFVSEETGTLIVNSVLLFLAFVVFLLVTLAILTALRLCAYCCNIVNVSLVKPSFYVYS
RVKNLNSSRVPDLLV
>QNO39855.1 |envelope protein [Severe acute respiratory syndrome coronavirus 2]
MYSFVSEETGTLIVNSVLLFLAFVVFLLVTLAILTALRLCAYCCNIVNVSLVKPSFYVYS
RVKNLNSSRVPDLLV
>QNO39867.1 |envelope protein [Severe acute respiratory syndrome coronavirus 2]
MYSFVSEETGTLIVNSVLLFLAFVVFLLVTLAILTALRLCAYCCNIVNVSLVKPSFYVYS
RVKNLNSSRVPDLLV
>QNO39879.1 |envelope protein [Severe acute respiratory syndrome coronavirus 2]
MYSFVSEETGTLIVNSVLLFLAFVVFLLVTLAILTALRLCAYCCNIVNVSLVKPSFYVYS
RVKNLNSSRVPDLLV
>QNO39891.1 |envelope protein [Severe acute respiratory syndrome coronavirus 2]
MYSFVSEETGTLIVNSVLLFLAFVVFLLVTLAILTALRLCAYCCNIVNVSLVKPSFYVYS
RVKNLNSSRVPDLLV
>QNO39903.1 |envelope protein [Severe acute respiratory syndrome coronavirus 2]
MYSFVSEETGTLIVNSVLLFLAFVVFLLVTLAILTALRLCAYCCNIVNVSLVKPSFYVYS
RVKNLNSSRVPDLLV
>QNO39915.1 |envelope protein [Severe acute respiratory syndrome coronavirus 2]
MYSFVSEETGTLIVNSVLLFLAFVVFLLVTLAILTALRLCAYCCNIVNVSLVKPSFYVYS
RVKNLNSSRVPDLLV
>QNO39927.1 |envelope protein [Severe acute respiratory syndrome coronavirus 2]
MYSFVSEETGTLIVNSVLLFLAFVVFLLVTLAILTALRLCAYCCNIVNVSLVKPSFYVYS
RVKNLNSSRVPDLLV
>QNO39939.1 |envelope protein [Severe acute respiratory syndrome coronavirus 2]
MYSFVSEETGTLIVNSVLLFLAFVVFLLVTLAILTALRLCAYCCNIVNVSLVKPSFYVYS
RVKNLNSSRVPDLLV
>QNO39951.1 |envelope protein [Severe acute respiratory syndrome coronavirus 2]
MYSFVSEETGTLIVNSVLLFLAFVVFLLVTLAILTALRLCAYCCNIVNVSLVKPSFYVYS
RVKNLNSSRVPDFLV
>QNO39963.1 |envelope protein [Severe acute respiratory syndrome coronavirus 2]
MYSFVSEETGTLIVNSVLLFLAFVVFLLVTLAILTALRLCAYCCNIVNVSLVKPSFYVYS
RVKNLNSSRVPDLLV
>QNO39975.1 |envelope protein [Severe acute respiratory syndrome coronavirus 2]
MYSFVSEETGTLIVNSVLLFLAFVVFLLVTLAILTALRLCAYCCNIVNVSLVKPSFYVYS
RVKNLNSSRVPDLLV
>QNO39987.1 |envelope protein [Severe acute respiratory syndrome coronavirus 2]
MYSFVSEETGTLIVNSVLLFLAFVVFLLVTLAILTALRLCAYCCNIVNVSLVKPSFYVYS
RVKNLNSSRVPDLLV
>QNO39999.1 |envelope protein [Severe acute respiratory syndrome coronavirus 2]
MYSFVSEETGTLIVNSVLLFLAFVVFLLVTLAILTALRLCAYCCNIVNVSLVKPSFYVYS
RVKNLNSSRVPDFLV
>QNO40011.1 |envelope protein [Severe acute respiratory syndrome coronavirus 2]
MYSFVSEETGTLIVNSVLLFLAFVVFLLVTLAILTALRLCAYCCNIVNVSLVKPSFYVYS
RVKNLNSSRVPDLLV
>QNO40023.1 |envelope protein [Severe acute respiratory syndrome coronavirus 2]
MYSFVSEETGTLIVNSVLLFLAFVVFLLVTLAILTALRLCAYCCNIVNVSLVKPSFYVYS
RVKNLNSSRVPDLLV
>QNO40035.1 |envelope protein [Severe acute respiratory syndrome coronavirus 2]
MYSFVSEETGTLIVNSVLLFLAFVVFLLVTLAILTALRLCAYCCNIVNVSLVKPSFYVYS
RVKNLNSSRVPDLLV
>QNO40047.1 |envelope protein [Severe acute respiratory syndrome coronavirus 2]
MYSFVSEETGTLIVNSVLLFLAFVVFLLVTLAILTALRLCAYCCNIVNVSLVKPSFYVYS
RVKNLNSSRVPDLLV
>QNO40059.1 |envelope protein [Severe acute respiratory syndrome coronavirus 2]
MYSFVSEETGTLIVNSVLLFLAFVVFLLVTLAILTALRLCAYCCNIVNVSLVKPSFYVYS
RVKNLNSSRVPDLLV
>QNO40071.1 |envelope protein [Severe acute respiratory syndrome coronavirus 2]
MYSFVSEETGTLIVNSVLLFLAFVVFLLVTLAILTALRLCAYCCNIVNVSLVKPSFYVYS
RVKNLNSSRVPDLLV
>QNO40083.1 |envelope protein [Severe acute respiratory syndrome coronavirus 2]
MYSFVSEETGTLIVNSVLLFLAFVVFLLVTLAILTALRLCAYCCNIVNVSLVKPSFYVYS
RVKNLNSSRVPDLLV
>QNO40095.1 |envelope protein [Severe acute respiratory syndrome coronavirus 2]
MYSFVSEETGTLIVNSVLLFLAFVVFLLVTLAILTALRLCAYCCNIVNVSLVKPSFYVYS
RVKNLNSSRVPDLLV
>QNO40107.1 |envelope protein [Severe acute respiratory syndrome coronavirus 2]
MYSFVSEETGTLIVNSVLLFLAFVVFLLVTLAILTALRLCAYCCNIVNVSLVKPSFYVYS
RVKNLNSSRVPDLLV
>QNO40119.1 |envelope protein [Severe acute respiratory syndrome coronavirus 2]
MYSFVSEETGTLIVNSVLLFLAFVVFLLVTLAILTALRLCAYCCNIVNVSLVKPSFYVYS
RVKNLNSSRVPDLLV
>QNO40131.1 |envelope protein [Severe acute respiratory syndrome coronavirus 2]
MYSFVSEETGTLIVNSVLLFLAFVVFLLVTLAILTALRLCAYCCNIVNVSLVKPSFYVYS
RVKNLNSSRVPDLLV
>QNO40143.1 |envelope protein [Severe acute respiratory syndrome coronavirus 2]
MYSFVSEETGTLIVNSVLLFLAFVVFLLVTLAILTALRLCAYCCNIVNVSLVKPSFYVYS
RVKNLNSSRVPDLLV
>QNO40155.1 |envelope protein [Severe acute respiratory syndrome coronavirus 2]
MYSFVSEETGTLIVNSVLLFLAFVVFLLVTLAILTALRLCAYCCNIVNVSLVKPSFYVYS
RVKNLNSSRVPDLLV
>QNO40167.1 |envelope protein [Severe acute respiratory syndrome coronavirus 2]
MYSFVSEETGTLIVNSVLLFLAFVVFLLVTLAILTALRLCAYCCNIVNVSLVKPSFYVYS
RVKNLNSSRVPDLLV
>QNO40179.1 |envelope protein [Severe acute respiratory syndrome coronavirus 2]
MYSFVSEETGTLIVNSVLLFLAFVVFLLVTLAILTALRLCAYCCNIVNVSLVKPSFYVYS
RVKNLNSSRVPDLLV
>QNO40191.1 |envelope protein [Severe acute respiratory syndrome coronavirus 2]
MYSFVSEETGTLIVNSVLLFLAFVVFLLVTLAILTALRLCAYCCNIVNVSLVKPSFYVYS
RVKNLNSSRVPDLLV
>QNO40203.1 |envelope protein [Severe acute respiratory syndrome coronavirus 2]
MYSFVSEETGTLIVNSVLLFLAFVVFLLVTLAILTALRLCAYCCNIVNVSLVKPSFYVYS
RVKNLNSSRVPDLLV
>QNO40215.1 |envelope protein [Severe acute respiratory syndrome coronavirus 2]
MYSFVSEETGTLIVNSVLLFLAFVVFLLVTLAILTALRLCAYCCNIVNVSLVKPSFYVYS
RVKNLNSSRVPDLLV
>QNO40227.1 |envelope protein [Severe acute respiratory syndrome coronavirus 2]
MYSFVSEETGTLIVNSVLLFLAFVVFLLVTLAILTALRLCAYCCNIVNVSLVKPSFYVYS
RVKNLNSSRVPDLLV
>QNO40239.1 |envelope protein [Severe acute respiratory syndrome coronavirus 2]
MYSFVSEETGTLIVNSVLLFLAFVVFLLVTLAILTALRLCAYCCNIVNVSLVKPSFYVYS
RVKNLNSSRVPDLLV
>QNO40251.1 |envelope protein [Severe acute respiratory syndrome coronavirus 2]
MYSFVSEETGTLIVNSVLLFLAFVVFLLVTLAILTALRLCAYCCNIVNVSLVKPSFYVYS
RVKNLNSSRVPDLLV
>QNO40263.1 |envelope protein [Severe acute respiratory syndrome coronavirus 2]
MYSFVSEETGTLIVNSVLLFLAFVVFLLVTLAILTALRLCAYCCNIVNVSLVKPSFYVYS
RVKNLNSSRVPDLLV
>QNO40275.1 |envelope protein [Severe acute respiratory syndrome coronavirus 2]
MYSFVSEETGTLIVNSVLLFLAFVVFLLVTLAILTALRLCAYCCNIVNVSLVKPSFYVYS
RVKNLNSSRVPDLLV
>QNO40287.1 |envelope protein [Severe acute respiratory syndrome coronavirus 2]
MYSFVSEETGTLIVNSVLLFLAFVVFLLVTLAILTALRLCAYCCNIVNVSLVKPSFYVYS
RVKNLNSSRVPDLLV
>QNO40299.1 |envelope protein [Severe acute respiratory syndrome coronavirus 2]
MYSFVSEETGTLIVNSVLLFLAFVVFLLVTLAILTALRLCAYCCNIVNVSLVKPSFYVYS
RVKNLNSSRVPDLLV
>QNO40311.1 |envelope protein [Severe acute respiratory syndrome coronavirus 2]
MYSFVSEETGTLIVNSVLLFLAFVVFLLVTLAILTALRLCAYCCNIVNVSLVKPSFYVYS
RVKNLNSSRVPDLLV
>QNO40323.1 |envelope protein [Severe acute respiratory syndrome coronavirus 2]
MYSFVSEETGTLIVNSVLLFLAFVVFLLVTLAILTALRLCAYCCNIVNVSLVKPSFYVYS
RVKNLNSSRVPDLLV
>QNO40335.1 |envelope protein [Severe acute respiratory syndrome coronavirus 2]
MYSFVSEETGTLIVNSVLLFLAFVVFLLVTLAILTALRLCAYCCNIVNVSLVKPSFYVYS
RVKNLNSSRVPDLLV
>QNO40347.1 |envelope protein [Severe acute respiratory syndrome coronavirus 2]
MYSFVSEETGTLIVNSVLLFLAFVVFLLVTLAILTALRLCAYCCNIVNVSLVKPSFYVYS
RVKNLNSSRVPDLLV
>QNO40359.1 |envelope protein [Severe acute respiratory syndrome coronavirus 2]
MYSFVSEETGTLIVNSVLLFLAFVVFLLVTLAILTALRLCAYCCNIVNVSLVKPSFYVYS
RVKNLNSSRVPDLLV
>QNO40371.1 |envelope protein [Severe acute respiratory syndrome coronavirus 2]
MYSFVSEETGTLIVNSVLLFLAFVVFLLVTLAILTALRLCAYCCNIVNVSLVKPSFYVYS
RVKNLNSSRVPDLLV
>QNO40383.1 |envelope protein [Severe acute respiratory syndrome coronavirus 2]
MYSFVSEETGTLIVNSVLLFLAFVVFLLVTLAILTALRLCAYCCNIVNVSLVKPSFYVYS
RVKNLNSSRVPDLLV
>QNO40395.1 |envelope protein [Severe acute respiratory syndrome coronavirus 2]
MYSFVSEETGTLIVNSVLLFLAFVVFLLVTLAILTALRLCAYCCNIVNVSLVKPSFYVYS
RVKNLNSSRVPDLLV
>QNO40407.1 |envelope protein [Severe acute respiratory syndrome coronavirus 2]
MYSFVSEETGTLIVNSVLLFLAFVVFLLVTLAILTALRLCAYCCNIVNVSLVKPSFYVYS
RVKNLNSSRVPDLLV
>QNO40419.1 |envelope protein [Severe acute respiratory syndrome coronavirus 2]
MYSFVSEETGTLIVNSVLLFLAFVVFLLVTLAILTALRLCAYCCNIVNVSLVKPSFYVYS
RVKNLNSSRVPDLLV
>QNO40431.1 |envelope protein [Severe acute respiratory syndrome coronavirus 2]
MYSFVSEETGTLIVNSVLLFLAFVVFLLVTLAILTALRLCAYCCNIVNVSLVKPSFYVYS
RVKNLNSSRVPDLLV
>QNO40443.1 |envelope protein [Severe acute respiratory syndrome coronavirus 2]
MYSFVSEETGTLIVNSVLLFLAFVVFLLVTLAILTALRLCAYCCNIVNVSLVKPSFYVYS
RVKNLNSSRVPDLLV
>QNO40455.1 |envelope protein [Severe acute respiratory syndrome coronavirus 2]
MYSFVSEETGTLIVNSVLLFLAFVVFLLVTLAILTALRLCAYCCNIVNVSLVKPSFYVYS
RVKNLNSSRVPDLLV
>QNO40467.1 |envelope protein [Severe acute respiratory syndrome coronavirus 2]
MYSFVSEETGTLIVNSVLLFLAFVVFLLVTLAILTALRLCAYCCNIVNVSLVKPSFYVYS
RVKNLNSSRVPDFLV
>QNO40479.1 |envelope protein [Severe acute respiratory syndrome coronavirus 2]
MYSFVSEETGTLIVNSVLLFLAFVVFLLVTLAILTALRLCAYCCNIVNVSLVKPSFYVYS
RVKNLNSSRVPDLLV
>QNO40598.1 |envelope protein [Severe acute respiratory syndrome coronavirus 2]
MYSFVSEETGTLIVNSVLLFLAFVVFLLVTLAILTALRLCAYCCNIVNVSLVKPSFYVYS
RVKNLNSSRVPDLLV
>QNO40610.1 |envelope protein [Severe acute respiratory syndrome coronavirus 2]
MYSFVSEETGTLIVNSVLLFLAFVVFLLVTLAILTALRLCAYCCNIVNVSLVKPSFYVYS
RVKNLNSSRVPDLLV
>QNO40622.1 |envelope protein [Severe acute respiratory syndrome coronavirus 2]
MYSFVSEETGTLIVNSVLLFLAFVVFLLVTLAILTALRLCAYCCNIVNVSLVKPSFYVYS
RVKNLNSSRVPDLLV
>QNO40634.1 |envelope protein [Severe acute respiratory syndrome coronavirus 2]
MYSFVSEETGTLIVNSVLLFLAFVVFLLVTLAILTALRLCAYCCNIVNVSLVKPSFYVYS
RVKNLNSSRVPDLLV
>QNO40646.1 |envelope protein [Severe acute respiratory syndrome coronavirus 2]
MYSFVSEETGTLIVNSVLLFLAFVVFLLVTLAILTALRLCAYCCNIVNVSLVKPSFYVYS
RVKNLNSSRVPDLLV
>QNO40658.1 |envelope protein [Severe acute respiratory syndrome coronavirus 2]
MYSFVSEETGTLIVNSVLLFLAFVVFLLVTLAILTALRLCAYCCNIVNVSLVKPSFYVYS
RVKNLNSSRVPDLLV
>QNO40670.1 |envelope protein [Severe acute respiratory syndrome coronavirus 2]
MYSFVSEETGTLIVNSVLLFLAFVVFLLVTLAILTALRLCAYCCNIVNVSLVKPSFYVYS
RVKNLNSSRVPDLLV
>QNO40682.1 |envelope protein [Severe acute respiratory syndrome coronavirus 2]
MYSFVSEETGTLIVNSVLLFLAFVVFLLVTLAILTALRLCAYCCNIVNVSLVKPSFYVYS
RVKNLNSSRVPDLLV
>QNO40694.1 |envelope protein [Severe acute respiratory syndrome coronavirus 2]
MYSFVSEETGTLIVNSVLLFLAFVVFLLVTLAILTALRLCAYCCNIVNVSLVKPSFYVYS
RVKNLNSSRVPDLLV
>QNO40706.1 |envelope protein [Severe acute respiratory syndrome coronavirus 2]
MYSFVSEETGTLIVNSVLLFLAFVVFLLVTLAILTALRLCAYCCNIVNVSLVKPSFYVYS
RVKNLNSSRVPDLLV
>QNO40718.1 |envelope protein [Severe acute respiratory syndrome coronavirus 2]
MYSFVSEETGTLIVNSVLLFLAFVVFLLVTLAILTALRLCAYCCNIVNVSLVKPSFYVYS
RVKNLNSSRVPDLLV
>QNO40730.1 |envelope protein [Severe acute respiratory syndrome coronavirus 2]
MYSFVSEETGTLIVNSVLLFLAFVVFLLVTLAILTALRLCAYCCNIVNVSLVKPSFYVYS
RVKNLNSSRVPDLLV
>QNO40742.1 |envelope protein [Severe acute respiratory syndrome coronavirus 2]
MYSFVSEETGTLIVNSVLLFLAFVVFLLVTLAILTALRLCAYCCNIVNVSLVKPSFYVYS
RVKNLNSSRVPDLLV
>QNO40754.1 |envelope protein [Severe acute respiratory syndrome coronavirus 2]
MYSFVSEETGTLIVNSVLLFLAFVVFLLVTLAILTALRLCAYCCNIVNVSLVKPSFYVYS
RVKNLNSSRVPDLLV
>QNO40766.1 |envelope protein [Severe acute respiratory syndrome coronavirus 2]
MYSFVSEETGTLIVNSVLLFLAFVVFLLVTLAILTALRLCAYCCNIVNVSLVKPSFYVYS
RVKNLNSSRVPDLLV
>QNO40778.1 |envelope protein [Severe acute respiratory syndrome coronavirus 2]
MYSFVSEETGTLIVNSVLLFLAFVVFLLVTLAILTALRLCAYCCNIVNVSLVKPSFYVYS
RVKNLNSSRVPDLLV
>QNO40790.1 |envelope protein [Severe acute respiratory syndrome coronavirus 2]
MYSFVSEETGTLIVNSVLLFLAFVVFLLVTLAILTALRLCAYCCNIVNVSLVKPSFYVYS
RVKNLNSSRVPDLLV
>QNO40802.1 |envelope protein [Severe acute respiratory syndrome coronavirus 2]
MYSFVSEETGTLIVNSVLLFLAFVVFLLVTLAILTALRLCAYCCNIVNVSLVKPSFYVYS
RVKNLNSSRVPDLLV
>QNO40814.1 |envelope protein [Severe acute respiratory syndrome coronavirus 2]
MYSFVSEETGTLIVNSVLLFLAFVVFLLVTLAILTALRLCAYCCNIVNVSLVKPSFYVYS
RVKNLNSSRVPDLLV
>QNO40826.1 |envelope protein [Severe acute respiratory syndrome coronavirus 2]
MYSFVSEETGTLIVNSVLLFLAFVVFLLVTLAILTALRLCAYCCNIVNVSLVKPSFYVYS
RVKNLNSSRVPDLLV
>QNO40838.1 |envelope protein [Severe acute respiratory syndrome coronavirus 2]
MYSFVSEETGTLIVNSVLLFLAFVVFLLVTLAILTALRLCAYCCNIVNVSLVKPSFYVYS
RVKNLNSSRVPDLLV
>QNO40850.1 |envelope protein [Severe acute respiratory syndrome coronavirus 2]
MYSFVSEETGTLIVNSVLLFLAFVVFLLVTLAILTALRLCAYCCNIVNVSLVKPSFYVYS
RVKNLNSSRVPDLLV
>QNO40862.1 |envelope protein [Severe acute respiratory syndrome coronavirus 2]
MYSFVSEETGTLIVNSVLLFLAFVVFLLVTLAILTALRLCAYCCNIVNVSLVKPSFYVYS
RVKNLNSSRVPDLLV
>QNO40874.1 |envelope protein [Severe acute respiratory syndrome coronavirus 2]
MYSFVSEETGTLIVNSVLLFLAFVVFLLVTLAILTALRLCAYCCNIVNVSLVKPSFYVYS
RVKNLNSSRVPDLLV
>QNO40886.1 |envelope protein [Severe acute respiratory syndrome coronavirus 2]
MYSFVSEETGTLIVNSVLLFLAFVVFLLVTLAILTALRLCAYCCNIVNVSLVKPSFYVYS
RVKNLNSSRVPDLLV
>QNO40898.1 |envelope protein [Severe acute respiratory syndrome coronavirus 2]
MYSFVSEETGTLIVNSVLLFLAFVVFLLVTLAILTALRLCAYCCNIVNVSLVKPSFYVYS
RVKNLNSSRVPDLLV
>QNO40910.1 |envelope protein [Severe acute respiratory syndrome coronavirus 2]
MYSFVSEETGTLIVNSVLLFLAFVVFLLVTLAILTALRLCAYCCNIVNVSLVKPSFYVYS
RVKNLNSSRVPDLLV
>QNO58693.1 |envelope protein [Severe acute respiratory syndrome coronavirus 2]
MYSFVSEETGTLIVNSVLLFLAFVVFLLVTLAILTALRLCAYCCNIVNVSLVKPSFYVYS
RVKNLNSSRVPDLLV
>QNO58705.1 |envelope protein [Severe acute respiratory syndrome coronavirus 2]
MYSFVSEETGTLIVNSVLLFLAFVVFLLVTLAILTALRLCAYCCNIVNVSLVKPSFYVYS
RVKNLNSSRVPDLLV
>QNO58717.1 |envelope protein [Severe acute respiratory syndrome coronavirus 2]
MYSFVSEETGTLIVNSVLLFLAFVVFLLVTLAILTALRLCAYCCNIVNVSLVKPSFYVYS
RVKNLNSSRVPDLLV
>QNO58729.1 |envelope protein [Severe acute respiratory syndrome coronavirus 2]
MYSFVSEETGTLIVNSVLLFLAFVVFLLVTLAILTALRLCAYCCNIVNVSLVKPSFYVYS
RVKNLNSSRVPDLLV
>QNO58741.1 |envelope protein [Severe acute respiratory syndrome coronavirus 2]
MYSFVSEETGTLIVNSVLLFLAFVVFLLVTLAILTALRLCAYCCNIVNVSLVKPSFYVYS
RVKNLNSSRVPDLLV
>QNO58753.1 |envelope protein [Severe acute respiratory syndrome coronavirus 2]
MYSFVSEETGTLIVNSVLLFLAFVVFLLVTLAILTALRLCAYCCNIVNVSLVKPSFYVYS
RVKNLNSSRVPDLLV
>QNO58765.1 |envelope protein [Severe acute respiratory syndrome coronavirus 2]
MYSFVSEETGTLIVNSVLLFLAFVVFLLVTLAILTALRLCAYCCNIVNVSLVKPSFYVYS
RVKNLNSSRVPDLLV
>QNO58777.1 |envelope protein [Severe acute respiratory syndrome coronavirus 2]
MYSFVSEETGTLIVNSVLLFLAFVVFLLVTLAILTALRLCAYCCNIVNVSLVKPSFYVYS
RVKNLNSSRVPDLLV
>QNO58789.1 |envelope protein [Severe acute respiratory syndrome coronavirus 2]
MYSFVSEETGTLIVNSVLLFLAFVVFLLVTLAILTALRLCAYCCNIVNVSLVKPSFYVYS
RVKNLNSSRVPDLLV
>QNO58801.1 |envelope protein [Severe acute respiratory syndrome coronavirus 2]
MYSFVSEETGTLIVNSVLLFLAFVVFLLVTLAILTALRLCAYCCNIVNVSLVKPSFYVYS
RVKNLNSSRVPDLLV
>QNO58813.1 |envelope protein [Severe acute respiratory syndrome coronavirus 2]
MYSFVSEETGTLIVNSVLLFLAFVVFLLVTLAILTALRLCAYCCNIVNVSLVKPSFYVYS
RVKNLNSSRVPDLLV
>QNO58825.1 |envelope protein [Severe acute respiratory syndrome coronavirus 2]
MYSFVSEETGTLIVNSVLLFLAFVVFLLVTLAILTALRLCAYCCNIVNVSLVKPSFYVYS
RVKNLNSSRVPDLLV
>QNO58837.1 |envelope protein [Severe acute respiratory syndrome coronavirus 2]
MYSFVSEETGTLIVNSVLLFLAFVVFLLVTLAILTALRLCAYCCNIVNVSLVKPSFYVYS
RVKNLNSSRVPDLLV
>QNO58849.1 |envelope protein [Severe acute respiratory syndrome coronavirus 2]
MYSFVSEETGTLIVNSVLLFLAFVVFLLVTLAILTALRLCAYCCNIVNVSLVKPSFYVYS
RVKNLNSSRVPDLLV
>QNO58861.1 |envelope protein [Severe acute respiratory syndrome coronavirus 2]
MYSFVSEETGTLIVNSVLLFLAFVVFLLVTLAILTALRLCAYCCNIVNVSLVKPSFYVYS
RVKNLNSSRVPDLLV
>QNO58873.1 |envelope protein [Severe acute respiratory syndrome coronavirus 2]
MYSFVSEETGTLIVNSVLLFLAFVVFLLVTLAILTALRLCAYCCNIVNVSLVKPSFYVYS
RVKNLNSSRVPDLLV
>QNO58885.1 |envelope protein [Severe acute respiratory syndrome coronavirus 2]
MYSFVSEETGTLIVNSVLLFLAFVVFLLVTLAILTALRLCAYCCNIVNVSLVKPSFYVYS
RVKNLNSSRVPDLLV
>QNO58897.1 |envelope protein [Severe acute respiratory syndrome coronavirus 2]
MYSFVSEETGTLIVNSVLLFLAFVVFLLVTLAILTALRLCAYCCNIVNVSLVKPSFYVYS
RVKNLNSSRVPDLLV
>QNO58909.1 |envelope protein [Severe acute respiratory syndrome coronavirus 2]
MYSFVSEETGTLIVNSVLLFLAFVVFLLVTLAILTALRLCAYCCNIVNVSLVKPSFYVYS
RVKNLNSSRVPDLLV
>QNO58921.1 |envelope protein [Severe acute respiratory syndrome coronavirus 2]
MYSFVSEETGTLIVNSVLLFLAFVVFLLVTLAILTALRLCAYCCNIVNVSLVKPSFYVYS
RVKNLNSSRVPDLLV
>QNO58933.1 |envelope protein [Severe acute respiratory syndrome coronavirus 2]
MYSFVSEETGTLIVNSVLLFLAFVVFLLVTLAILTALRLCAYCCNIVNVSLVKPSFYVYS
RVKNLNSSRVPDLLV
>QNO58945.1 |envelope protein [Severe acute respiratory syndrome coronavirus 2]
MYSFVSEETGTLIVNSVLLFLAFVVFLLVTLAILTALRLCAYCCNIVNVSLVKPSFYVYS
RVKNLNSSRVPDLLV
>QNO58957.1 |envelope protein [Severe acute respiratory syndrome coronavirus 2]
MYSFVSEETGTLIVNSVLLFLAFVVFLLVTLAILTALRLCAYCCNIVNVSLVKPSFYVYS
RVKNLNSSRVPDLLV
>QNO58969.1 |envelope protein [Severe acute respiratory syndrome coronavirus 2]
MYSFVSEETGTLIVNSVLLFLAFVVFLLVTLAILTALRLCAYCCNIVNVSLVKPSFYVYS
RVKNLNSSRVPDLLV
>QNO58981.1 |envelope protein [Severe acute respiratory syndrome coronavirus 2]
MYSFVSEETGTLIVNSVLLFLAFVVFLLVTLAILTALRLCAYCCNIVNVSLVKPSFYVYS
RVKNLNSSRVPDLLV
>QNO58993.1 |envelope protein [Severe acute respiratory syndrome coronavirus 2]
MYSFVSEETGTLIVNSVLLFLAFVVFLLVTLAILTALRLCAYCCNIVNVSLVKPSFYVYS
RVKNLNSSRVPDLLV
>QNO59005.1 |envelope protein [Severe acute respiratory syndrome coronavirus 2]
MYSFVSEETGTLIVNSVLLFLAFVVFLLVTLAILTALRLCAYCCNIVNVSLVKPSFYVYS
RVKNLNSSRVPDLLV
>QNO59017.1 |envelope protein [Severe acute respiratory syndrome coronavirus 2]
MYSFVSEETGTLIVNSVLLFLAFVVFLLVTLAILTALRLCAYCCNIVNVSLVKPSFYVYS
RVKNLNSSRVPDLLV
>QNO59029.1 |envelope protein [Severe acute respiratory syndrome coronavirus 2]
MYSFVSEETGTLIVNSVLLFLAFVVFLLVTLAILTALRLCAYCCNIVNVSLVKPSFYVYS
RVKNLNSSRVPDLLV
>QNO59041.1 |envelope protein [Severe acute respiratory syndrome coronavirus 2]
MYSFVSEETGTLIVNSVLLFLAFVVFLLVTLAILTALRLCAYCCNIVNVSLVKPSFYVYS
RVKNLNSSRVPDLLV
>QNO59053.1 |envelope protein [Severe acute respiratory syndrome coronavirus 2]
MYSFVSEETGTLIVNSVLLFLAFVVFLLVTLAILTALRLCAYCCNIVNVSLVKPSFYVYS
RVKNLNSSRVPDLLV
>QNO59065.1 |envelope protein [Severe acute respiratory syndrome coronavirus 2]
MYSFVSEETGTLIVNSVLLFLAFVVFLLVTLAILTALRLCAYCCNIVNVSLVKPSFYVYS
RVKNLNSSRVPDLLV
>QNO59077.1 |envelope protein [Severe acute respiratory syndrome coronavirus 2]
MYSFVSEETGTLIVNSVLLFLAFVVFLLVTLAILTALRLCAYCCNIVNVSLVKPSFYVYS
RVKNLNSSRVPDLLV
>QNO59089.1 |envelope protein [Severe acute respiratory syndrome coronavirus 2]
MYSFVSEETGTLIVNSVLLFLAFVVFLLVTLAILTALRLCAYCCNIVNVSLVKPSFYVYS
RVKNLNSSRVPDLLV
>QNO59101.1 |envelope protein [Severe acute respiratory syndrome coronavirus 2]
MYSFVSEETGTLIVNSVLLFLAFVVFLLVTLAILTALRLCAYCCNIVNVSLVKPSFYVYS
RVKNLNSSRVPDLLV
>QNO59113.1 |envelope protein [Severe acute respiratory syndrome coronavirus 2]
MYSFVSEETGTLIVNSVLLFLAFVVFLLVTLAILTALRLCAYCCNIVNVSLVKPSFYVYS
RVKNLNSSRVPDLLV
>QNO59125.1 |envelope protein [Severe acute respiratory syndrome coronavirus 2]
MYSFVSEETGTLIVNSVLLFLAFVVFLLVTLAILTALRLCAYCCNIVNVSLVKPSFYVYS
RVKNLNSSRVPDLLV
>QNO59137.1 |envelope protein [Severe acute respiratory syndrome coronavirus 2]
MYSFVSEETGTLIVNSVLLFLAFVVFLLVTLAILTALRLCAYCCNIVNVSLVKPSFYVYS
RVKNLNSSRVPDLLV
>QNO59149.1 |envelope protein [Severe acute respiratory syndrome coronavirus 2]
MYSFVSEETGTLIVNSVLLFLAFVVFLLVTLAILTALRLCAYCCNIVNVSLVKPSFYVYS
RVKNLNSSRVPDLLV
>QNO59161.1 |envelope protein [Severe acute respiratory syndrome coronavirus 2]
MYSFVSEETGTLIVNSVLLFLAFVVFLLVTLAILTALRLCAYCCNIVNVSLVKPSFYVYS
RVKNLNSSRVPDLLV
>QNO59173.1 |envelope protein [Severe acute respiratory syndrome coronavirus 2]
MYSFVSEETGTLIVNSVLLFLAFVVFLLVTLAILTALRLCAYCCNIVNVSLVKPSFYVYS
RVKNLNSSRVPDLLV
>QNO59185.1 |envelope protein [Severe acute respiratory syndrome coronavirus 2]
MYSFVSEETGTLIVNSVLLFLAFVVFLLVTLAILTALRLCAYCCNIVNVSLVKPSFYVYS
RVKNLNSSRVPDLLV
>QNO59197.1 |envelope protein [Severe acute respiratory syndrome coronavirus 2]
MYSFVSEETGTLIVNSVLLFLAFVVFLLVTLAILTALRLCAYCCNIVNVSLVKPSFYVYS
RVKNLNSSRVPDLLV
>QNO59209.1 |envelope protein [Severe acute respiratory syndrome coronavirus 2]
MYSFVSEETGTLIVNSVLLFLAFVVFLLVTLAILTALRLCAYCCNIVNVSLVKPSFYVYS
RVKNLNSSRVPDLLV
>QNO59221.1 |envelope protein [Severe acute respiratory syndrome coronavirus 2]
MYSFVSEETGTLIVNSVLLFLAFVVFLLVTLAILTALRLCAYCCNIVNVSLVKPSFYVYS
RVKNLNSSRVPDLLV
>QNO59233.1 |envelope protein [Severe acute respiratory syndrome coronavirus 2]
MYSFVSEETGTLIVNSVLLFLAFVVFLLVTLAILTALRLCAYCCNIVNVSLVKPSFYVYS
RVKNLNSSRVPDLLV
>QNO59245.1 |envelope protein [Severe acute respiratory syndrome coronavirus 2]
MYSFVSEETGTLIVNSVLLFLAFVVFLLVTLAILTALRLCAYCCNIVNVSLVKPSFYVYS
RVKNLNSSRVPDLLV
>QNO59257.1 |envelope protein [Severe acute respiratory syndrome coronavirus 2]
MYSFVSEETGTLIVNSVLLFLAFVVFLLVTLAILTALRLCAYCCNIVNVSLVKPSFYVYS
RVKNLNSSRVPDLLV
>QNO59269.1 |envelope protein [Severe acute respiratory syndrome coronavirus 2]
MYSFVSEETGTLIVNSVLLFLAFVVFLLVTLAILTALRLCAYCCNIVNVSLVKPSFYVYS
RVKNLNSSRVPDLLV
>QNO59281.1 |envelope protein [Severe acute respiratory syndrome coronavirus 2]
MYSFVSEETGTLIVNSVLLFLAFVVFLLVTLAILTALRLCAYCCNIVNVSLVKPSFYVYS
RVKNLNSSRVPDLLV
>QNO59293.1 |envelope protein [Severe acute respiratory syndrome coronavirus 2]
MYSFVSEETGTLIVNSVLLFLAFVVFLLVTLAILTALRLCAYCCNIVNVSLVKPSFYVYS
RVKNLNSSRVPDLLV
>QNO59305.1 |envelope protein [Severe acute respiratory syndrome coronavirus 2]
MYSFVSEETGTLIVNSVLLFLAFVVFLLVTLAILTALRLCAYCCNIVNVSLVKPSFYVYS
RVKNLNSSRVPDLLV
>QNO59317.1 |envelope protein [Severe acute respiratory syndrome coronavirus 2]
MYSFVSEETGTLIVNSVLLFLAFVVFLLVTLAILTALRLCAYCCNIVNVSLVKPSFYVYS
RVKNLNSSRVPDLLV
>QNO59329.1 |envelope protein [Severe acute respiratory syndrome coronavirus 2]
MYSFVSEETGTLIVNSVLLFLAFVVFLLVTLAILTALRLCAYCCNIVNVSLVKPSFYVYS
RVKNLNSSRVPDLLV
>QNO59341.1 |envelope protein [Severe acute respiratory syndrome coronavirus 2]
MYSFVSEETGTLIVNSVLLFLAFVVFLLVTLAILTALRLCAYCCNIVNVSLVKPSFYVYS
RVKNLNSSRVPDLLV
>QNO59353.1 |envelope protein [Severe acute respiratory syndrome coronavirus 2]
MYSFVSEETGTLIVNSVLLFLAFVVFLLVTLAILTALRLCAYCCNIVNVSLVKPSFYVYS
RVKNLNSSRVPDLLV
>QNO59365.1 |envelope protein [Severe acute respiratory syndrome coronavirus 2]
MYSFVSEETGTLIVNSVLLFLAFVVFLLVTLAILTALRLCAYCCNIVNVSLVKPSFYVYS
RVKNLNSSRVPDLLV
>QNO59377.1 |envelope protein [Severe acute respiratory syndrome coronavirus 2]
MYSFVSEETGTLIVNSVLLFLAFVVFLLVTLAILTALRLCAYCCNIVNVSLVKPSFYVYS
RVKNLNSSRVPDLLV
>QNO59389.1 |envelope protein [Severe acute respiratory syndrome coronavirus 2]
MYSFVSEETGTLIVNSVLLFLAFVVFLLVTLAILTALRLCAYCCNIVNVSLVKPSFYVYS
RVKNLNSSRVPDLLV
>QNO59401.1 |envelope protein [Severe acute respiratory syndrome coronavirus 2]
MYSFVSEETGTLIVNSVLLFLAFVVFLLVTLAILTALRLCAYCCNIVNVSLVKPSFYVYS
RVKNLNSSRVPDLLV
>QNO59413.1 |envelope protein [Severe acute respiratory syndrome coronavirus 2]
MYSFVSEETGTLIVNSVLLFLAFVVFLLVTLAILTALRLCAYCCNIVNVSLVKPSFYVYS
RVKNLNSSRVPDLLV
>QNO59425.1 |envelope protein [Severe acute respiratory syndrome coronavirus 2]
MYSFVSEETGTLIVNSVLLFLAFVVFLLVTLAILTALRLCAYCCNIVNVSLVKPSFYVYS
RVKNLNSSRVPDLLV
>QNO59437.1 |envelope protein [Severe acute respiratory syndrome coronavirus 2]
MYSFVSEETGTLIVNSVLLFLAFVVFLLVTLAILTALRLCAYCCNIVNVSLVKPSFYVYS
RVKNLNSSRVPDLLV
>QNO59449.1 |envelope protein [Severe acute respiratory syndrome coronavirus 2]
MYSFVSEETGTLIVNSVLLFLAFVVFLLVTLAILTALRLCAYCCNIVNVSLVKPSFYVYS
RVKNLNSSRVPDLLV
>QNO59461.1 |envelope protein [Severe acute respiratory syndrome coronavirus 2]
MYSFVSEETGTLIVNSVLLFLAFVVFLLVTLAILTALRLCAYCCNIVNVSLVKPSFYVYS
RVKNLNSSRVPDLLV
>QNO59473.1 |envelope protein [Severe acute respiratory syndrome coronavirus 2]
MYSFVSEETGTLIVNSVLLFLAFVVFLLVTLAILTALRLCAYCCNIVNVSLVKPSFYVYS
RVKNLNSSRVPDLLV
>QNO59485.1 |envelope protein [Severe acute respiratory syndrome coronavirus 2]
MYSFVSEETGTLIVNSVLLFLAFVVFLLVTLAILTALRLCAYCCNIVNVSLVKPSFYVYS
RVKNLNSSRVPDLLV
>QNO59497.1 |envelope protein [Severe acute respiratory syndrome coronavirus 2]
MYSFVSEETGTLIVNSVLLFLAFVVFLLVTLAILTALRLCAYCCNIVNVSLVKPSFYVYS
RVKNLNSSRVPDLLV
>QNO59509.1 |envelope protein [Severe acute respiratory syndrome coronavirus 2]
MYSFVSEETGTLIVNSVLLFLAFVVFLLVTLAILTALRLCAYCCNIVNVSLVKPSFYVYS
RVKNLNSSRVPDLLV
>QNO59521.1 |envelope protein [Severe acute respiratory syndrome coronavirus 2]
MYSFVSEETGTLIVNSVLLFLAFVVFLLVTLAILTALRLCAYCCNIVNVSLVKPSFYVYS
RVKNLNSSRVPDLLV
>QNO59533.1 |envelope protein [Severe acute respiratory syndrome coronavirus 2]
MYSFVSEETGTLIVNSVLLFLAFVVFLLVTLAILTALRLCAYCCNIVNVSLVKPSFYVYS
RVKNLNSSRVPDLLV
>QNO59545.1 |envelope protein [Severe acute respiratory syndrome coronavirus 2]
MYSFVSEETGTLIVNSVLLFLAFVVFLLVTLAILTALRLCAYCCNIVNVSLVKPSFYVYS
RVKNLNSSRVPDLLV
>QNO59557.1 |envelope protein [Severe acute respiratory syndrome coronavirus 2]
MYSFVSEETGTLIVNSVLLFLAFVVFLLVTLAILTALRLCAYCCNIVNVSLVKPSFYVYS
RVKNLNSSRVPDLLV
>QNO59569.1 |envelope protein [Severe acute respiratory syndrome coronavirus 2]
MYSFVSEETGTLIVNSVLLFLAFVVFLLVTLAILTALRLCAYCCNIVNVSLVKPSFYVYS
RVKNLNSSRVPDLLV
>QNO59581.1 |envelope protein [Severe acute respiratory syndrome coronavirus 2]
MYSFVSEETGTLIVNSVLLFLAFVVFLLVTLAILTALRLCAYCCNIVNVSLVKPSFYVYS
RVKNLNSSRVPDLLV
>QNO59593.1 |envelope protein [Severe acute respiratory syndrome coronavirus 2]
MYSFVSEETGTLIVNSVLLFLAFVVFLLVTLAILTALRLCAYCCNIVNVSLVKPSFYVYS
RVKNLNSSRVPDLLV
>QNO59605.1 |envelope protein [Severe acute respiratory syndrome coronavirus 2]
MYSFVSEETGTLIVNSVLLFLAFVVFLLVTLAILTALRLCAYCCNIVNVSLVKPSFYVYS
RVKNLNSSRVPDLLV
>QNO59617.1 |envelope protein [Severe acute respiratory syndrome coronavirus 2]
MYSFVSEETGTLIVNSVLLFLAFVVFLLVTLAILTALRLCAYCCNIVNVSLVKPSFYVYS
RVKNLNSSRVPDLLV
>QNO59629.1 |envelope protein [Severe acute respiratory syndrome coronavirus 2]
MYSFVSEETGTLIVNSVLLFLAFVVFLLVTLAILTALRLCAYCCNIVNVSLVKPSFYVYS
RVKNLNSSRVPDLLV
>QNO59641.1 |envelope protein [Severe acute respiratory syndrome coronavirus 2]
MYSFVSEETGTLIVNSVLLFLAFVVFLLVTLAILTALRLCAYCCNIVNVSLVKPSFYVYS
RVKNLNSSRVPDLLV
>QNO59653.1 |envelope protein [Severe acute respiratory syndrome coronavirus 2]
MYSFVSEETGTLIVNSVLLFLAFVVFLLVTLAILTALRLCAYCCNIVNVSLVKPSFYVYS
RVKNLNSSRVPDLLV
>QNO59665.1 |envelope protein [Severe acute respiratory syndrome coronavirus 2]
MYSFVSEETGTLIVNSVLLFLAFVVFLLVTLAILTALRLCAYCCNIVNVSLVKPSFYVYS
RVKNLNSSRVPDLLV
>QNO59677.1 |envelope protein [Severe acute respiratory syndrome coronavirus 2]
MYSFVSEETGTLIVNSVLLFLAFVVFLLVTLAILTALRLCAYCCNIVNVSLVKPSFYVYS
RVKNLNSSRVPDLLV
>QNO59689.1 |envelope protein [Severe acute respiratory syndrome coronavirus 2]
MYSFVSEETGTLIVNSVLLFLAFVVFLLVTLAILTALRLCAYCCNIVNVSLVKPSFYVYS
RVKNLNSSRVPDLLV
>QNO59701.1 |envelope protein [Severe acute respiratory syndrome coronavirus 2]
MYSFVSEETGTLIVNSVLLFLAFVVFLLVTLAILTALRLCAYCCNIVNVSLVKPSFYVYS
RVKNLNSSRVPDLLV
>QNO59713.1 |envelope protein [Severe acute respiratory syndrome coronavirus 2]
MYSFVSEETGTLIVNSVLLFLAFVVFLLVTLAILTALRLCAYCCNIVNVSLVKPSFYVYS
RVKNLNSSRVPDLLV
>QNO59725.1 |envelope protein [Severe acute respiratory syndrome coronavirus 2]
MYSFVSEETGTLIVNSVLLFLAFVVFLLVTLAILTALRLCAYCCNIVNVSLVKPSFYVYS
RVKNLNSSRVPDLLV
>QNO59737.1 |envelope protein [Severe acute respiratory syndrome coronavirus 2]
MYSFVSEETGTLIVNSVLLFLAFVVFLLVTLAILTALRLCAYCCNIVNVSLVKPSFYVYS
RVKNLNSSRVPDLLV
>QNO59749.1 |envelope protein [Severe acute respiratory syndrome coronavirus 2]
MYSFVSEETGTLIVNSVLLFLAFVVFLLVTLAILTALRLCAYCCNIVNVSLVKPSFYVYS
RVKNLNSSRVPDLLV
>QNO59761.1 |envelope protein [Severe acute respiratory syndrome coronavirus 2]
MYSFVSEETGTLIVNSVLLFLAFVVFLLVTLAILTALRLCAYCCNIVNVSLVKPSFYVYS
RVKNLNSSRVPDLLV
>QNO59773.1 |envelope protein [Severe acute respiratory syndrome coronavirus 2]
MYSFVSEETGTLIVNSVLLFLAFVVFLLVTLAILTALRLCAYCCNIVNVSLVKPSFYVYS
RVKNLNSSRVPDLLV
>QNO59785.1 |envelope protein [Severe acute respiratory syndrome coronavirus 2]
MYSFVSEETGTLIVNSVLLFLAFVVFLLVTLAILTALRLCAYCCNIVNVSLVKPSFYVYS
RVKNLNSSRVPDLLV
>QNO59797.1 |envelope protein [Severe acute respiratory syndrome coronavirus 2]
MYSFVSEETGTLIVNSVLLFLAFVVFLLVTLAILTALRLCAYCCNIVNVSLVKPSFYVYS
RVKNLNSSRVPDLLV
>QNO59809.1 |envelope protein [Severe acute respiratory syndrome coronavirus 2]
MYSFVSEETGTLIVNSVLLFLAFVVFLLVTLAILTALRLCAYCCNIVNVSLVKPSFYVYS
RVKNLNSSRVPDLLV
>QNO59821.1 |envelope protein [Severe acute respiratory syndrome coronavirus 2]
MYSFVSEETGTLIVNSVLLFLAFVVFLLVTLAILTALRLCAYCCNIVNVSLVKPSFYVYS
RVKNLNSSRVPDLLV
>QNO59833.1 |envelope protein [Severe acute respiratory syndrome coronavirus 2]
MYSFVSEETGTLIVNSVLLFLAFVVFLLVTLAILTALRLCAYCCNIVNVSLVKPSFYVYS
RVKNLNSSRVPDLLV
>QNO59845.1 |envelope protein [Severe acute respiratory syndrome coronavirus 2]
MYSFVSEETGTLIVNSVLLFLAFVVFLLVTLAILTALRLCAYCCNIVNVSLVKPSFYVYS
RVKNLNSSRVPDLLV
>QNO59857.1 |envelope protein [Severe acute respiratory syndrome coronavirus 2]
MYSFVSEETGTLIVNSVLLFLAFVVFLLVTLAILTALRLCAYCCNIVNVSLVKPSFYVYS
RVKNLNSSRVPDLLV
>QNO59869.1 |envelope protein [Severe acute respiratory syndrome coronavirus 2]
MYSFVSEETGTLIVNSVLLFLAFVVFLLVTLAILTALRLCAYCCNIVNVSLVKPSFYVYS
RVKNLNSSRVPDLLV
>QNO59881.1 |envelope protein [Severe acute respiratory syndrome coronavirus 2]
MYSFVSEETGTLIVNSVLLFLAFVVFLLVTLAILTALRLCAYCCNIVNVSLVKPSFYVYS
RVKNLNSSRVPDLLV
>QNO59893.1 |envelope protein [Severe acute respiratory syndrome coronavirus 2]
MYSFVSEETGTLIVNSVLLFLAFVVFLLVTLAILTALRLCAYCCNIVNVSLVKPSFYVYS
RVKNLNSSRVPDLLV
>QNO59905.1 |envelope protein [Severe acute respiratory syndrome coronavirus 2]
MYSFVSEETGTLIVNSVLLFLAFVVFLLVTLAILTALRLCAYCCNIVNVSLVKPSFYVYS
RVKNLNSSRVPDLLV
>QNO59917.1 |envelope protein [Severe acute respiratory syndrome coronavirus 2]
MYSFVSEETGTLIVNSVLLFLAFVVFLLVTLAILTALRLCAYCCNIVNVSLVKPSFYVYS
RVKNLNSSRVPDLLV
>QNO59929.1 |envelope protein [Severe acute respiratory syndrome coronavirus 2]
MYSFVSEETGTLIVNSVLLFLAFVVFLLVTLAILTALRLCAYCCNIVNVSLVKPSFYVYS
RVKNLNSSRVPDLLV
>QNO59941.1 |envelope protein [Severe acute respiratory syndrome coronavirus 2]
MYSFVSEETGTLIVNSVLLFLAFVVFLLVTLAILTALRLCAYCCNIVNVSLVKPSFYVYS
RVKNLNSSRVPDLLV
>QNO59953.1 |envelope protein [Severe acute respiratory syndrome coronavirus 2]
MYSFVSEETGTLIVNSVLLFLAFVVFLLVTLAILTALRLCAYCCNIVNVSLVKPSFYVYS
RVKNLNSSRVPDLLV
>QNO59965.1 |envelope protein [Severe acute respiratory syndrome coronavirus 2]
MYSFVSEETGTLIVNSVLLFLAFVVFLLVTLAILTALRLCAYCCNIVNVSLVKPSFYVYS
RVKNLNSSRVPDLLV
>QNO59977.1 |envelope protein [Severe acute respiratory syndrome coronavirus 2]
MYSFVSEETGTLIVNSVLLFLAFVVFLLVTLAILTALRLCAYCCNIVNVSLVKPSFYVYS
RVKNLNSSRVPDLLV
>QNO59989.1 |envelope protein [Severe acute respiratory syndrome coronavirus 2]
MYSFVSEETGTLIVNSVLLFLAFVVFLLVTLAILTALRLCAYCCNIVNVSLVKPSFYVYS
RVKNLNSSRVPDLLV
>QNO60001.1 |envelope protein [Severe acute respiratory syndrome coronavirus 2]
MYSFVSEETGTLIVNSVLLFLAFVVFLLVTLAILTALRLCAYCCNIVNVSLVKPSFYVYS
RVKNLNSSRVPDLLV
>QNO60013.1 |envelope protein [Severe acute respiratory syndrome coronavirus 2]
MYSFVSEETGTLIVNSVLLFLAFVVFLLVTLAILTALRLCAYCCNIVNVSLVKPSFYVYS
RVKNLNSSRVPDLLV
>QNO60025.1 |envelope protein [Severe acute respiratory syndrome coronavirus 2]
MYSFVSEETGTLIVNSVLLFLAFVVFLLVTLAILTALRLCAYCCNIVNVSLVKPSFYVYS
RVKNLNSSRVPDLLV
>QNO60037.1 |envelope protein [Severe acute respiratory syndrome coronavirus 2]
MYSFVSEETGTLIVNSVLLFLAFVVFLLVTLAILTALRLCAYCCNIVNVSLVKPSFYVYS
RVKNLNSSRVPDLLV
>QNO60049.1 |envelope protein [Severe acute respiratory syndrome coronavirus 2]
MYSFVSEETGTLIVNSVLLFLAFVVFLLVTLAILTALRLCAYCCNIVNVSLVKPSFYVYS
RVKNLNSSRVPDLLV
>QNO60061.1 |envelope protein [Severe acute respiratory syndrome coronavirus 2]
MYSFVSEETGTLIVNSVLLFLAFVVFLLVTLAILTALRLCAYCCNIVNVSLVKPSFYVYS
RVKNLNSSRVPDLLV
>QNO60073.1 |envelope protein [Severe acute respiratory syndrome coronavirus 2]
MYSFVSEETGTLIVNSVLLFLAFVVFLLVTLAILTALRLCAYCCNIVNVSLVKPSFYVYS
RVKNLNSSRVPDLLV
>QNO60085.1 |envelope protein [Severe acute respiratory syndrome coronavirus 2]
MYSFVSEETGTLIVNSVLLFLAFVVFLLVTLAILTALRLCAYCCNIVNVSLVKPSFYVYS
RVKNLNSSRVPDLLV
>QNO60097.1 |envelope protein [Severe acute respiratory syndrome coronavirus 2]
MYSFVSEETGTLIVNSVLLFLAFVVFLLVTLAILTALRLCAYCCNIVNVSLVKPSFYVYS
RVKNLNSSRVPDLLV
>QNO60109.1 |envelope protein [Severe acute respiratory syndrome coronavirus 2]
MYSFVSEETGTLIVNSVLLFLAFVVFLLVTLAILTALRLCAYCCNIVNVSLVKPSFYVYS
RVKNLNSSRVPDLLV
>QNO60121.1 |envelope protein [Severe acute respiratory syndrome coronavirus 2]
MYSFVSEETGTLIVNSVLLFLAFVVFLLVTLAILTALRLCAYCCNIVNVSLVKPSFYVYS
RVKNLNSSRVPDLLV
>QNO60133.1 |envelope protein [Severe acute respiratory syndrome coronavirus 2]
MYSFVSEETGTLIVNSVLLFLAFVVFLLVTLAILTALRLCAYCCNIVNVSLVKPSFYVYS
RVKNLNSSRVPDLLV
>QNO60145.1 |envelope protein [Severe acute respiratory syndrome coronavirus 2]
MYSFVSEETGTLIVNSVLLFLAFVVFLLVTLAILTALRLCAYCCNIVNVSLVKPSFYVYS
RVKNLNSSRVPDLLV
>QNO60157.1 |envelope protein [Severe acute respiratory syndrome coronavirus 2]
MYSFVSEETGTLIVNSVLLFLAFVVFLLVTLAILTALRLCAYCCNIVNVSLVKPSFYVYS
RVKNLNSSRVPDLLV
>QNO60169.1 |envelope protein [Severe acute respiratory syndrome coronavirus 2]
MYSFVSEETGTLIVNSVLLFLAFVVFLLVTLAILTALRLCAYCCNIVNVSLVKPSFYVYS
RVKNLNSSRVPDLLV
>QNO60181.1 |envelope protein [Severe acute respiratory syndrome coronavirus 2]
MYSFVSEETGTLIVNSVLLFLAFVVFLLVTLAILTALRLCAYCCNIVNVSLVKPSFYVYS
RVKNLNSSRVPDLLV
>QNO60193.1 |envelope protein [Severe acute respiratory syndrome coronavirus 2]
MYSFVSEETGTLIVNSVLLFLAFVVFLLVTLAILTALRLCAYCCNIVNVSLVKPSFYVYS
RVKNLNSSRVPDLLV
>QNO60205.1 |envelope protein [Severe acute respiratory syndrome coronavirus 2]
MYSFVSEETGTLIVNSVLLFLAFVVFLLVTLAILTALRLCAYCCNIVNVSLVKPSFYVYS
RVKNLNSSRVPDLLV
>QNO60217.1 |envelope protein [Severe acute respiratory syndrome coronavirus 2]
MYSFVSEETGTLIVNSVLLFLAFVVFLLVTLAILTALRLCAYCCNIVNVSLVKPSFYVYS
RVKNLNSSRVPDLLV
>QNO60229.1 |envelope protein [Severe acute respiratory syndrome coronavirus 2]
MYSFVSEETGTLIVNSVLLFLAFVVFLLVTLAILTALRLCAYCCNIVNVSLVKPSFYVYS
RVKNLNSSRVPDLLV
>QNO60241.1 |envelope protein [Severe acute respiratory syndrome coronavirus 2]
MYSFVSEETGTLIVNSVLLFLAFVVFLLVTLAILTALRLCAYCCNIVNVSLVKPSFYVYS
RVKNLNSSRVPDLLV
>QNO60253.1 |envelope protein [Severe acute respiratory syndrome coronavirus 2]
MYSFVSEETGTLIVNSVLLFLAFVVFLLVTLAILTALRLCAYCCNIVNVSLVKPSFYVYS
RVKNLNSSRVPDLLV
>QNO60265.1 |envelope protein [Severe acute respiratory syndrome coronavirus 2]
MYSFVSEETGTLIVNSVLLFLAFVVFLLVTLAILTALRLCAYCCNIVNVSLVKPSFYVYS
RVKNLNSSRVPDLLV
>QNO60277.1 |envelope protein [Severe acute respiratory syndrome coronavirus 2]
MYSFVSEETGTLIVNSVLLFLAFVVFLLVTLAILTALRLCAYCCNIVNVSLVKPSFYVYS
RVKNLNSSRVPDLLV
>QNO60289.1 |envelope protein [Severe acute respiratory syndrome coronavirus 2]
MYSFVSEETGTLIVNSVLLFLAFVVFLLVTLAILTALRLCAYCCNIVNVSLVKPSFYVYS
RVKNLNSSRVPDLLV
>QNO60301.1 |envelope protein [Severe acute respiratory syndrome coronavirus 2]
MYSFVSEETGTLIVNSVLLFLAFVVFLLVTLAILTALRLCAYCCNIVNVSLVKPSFYVYS
RVKNLNSSRVPDLLV
>QNO60313.1 |envelope protein [Severe acute respiratory syndrome coronavirus 2]
MYSFVSEETGTLIVNSVLLFLAFVVFLLVTLAILTALRLCAYCCNIVNVSLVKPSFYVYS
RVKNLNSSRVPDLLV
>QNO60325.1 |envelope protein [Severe acute respiratory syndrome coronavirus 2]
MYSFVSEETGTLIVNSVLLFLAFVVFLLVTLAILTALRLCAYCCNIVNVSLVKPSFYVYS
RVKNLNSSRVPDLLV
>QNO60337.1 |envelope protein [Severe acute respiratory syndrome coronavirus 2]
MYSFVSEETGTLIVNSVLLFLAFVVFLLVTLAILTALRLCAYCCNIVNVSLVKPSFYVYS
RVKNLNSSRVPDLLV
>QNO60349.1 |envelope protein [Severe acute respiratory syndrome coronavirus 2]
MYSFVSEETGTLIVNSVLLFLAFVVFLLVTLAILTALRLCAYCCNIVNVSLVKPSFYVYS
RVKNLNSSRVPDLLV
>QNO60361.1 |envelope protein [Severe acute respiratory syndrome coronavirus 2]
MYSFVSEETGTLIVNSVLLFLAFVVFLLVTLAILTALRLCAYCCNIVNVSLVKPSFYVYS
RVKNLNSSRVPDLLV
>QNO60373.1 |envelope protein [Severe acute respiratory syndrome coronavirus 2]
MYSFVSEETGTLIVNSVLLFLAFVVFLLVTLAILTALRLCAYCCNIVNVSLVKPSFYVYS
RVKNLNSSRVPDLLV
>QNO60385.1 |envelope protein [Severe acute respiratory syndrome coronavirus 2]
MYSFVSEETGTLIVNSVLLFLAFVVFLLVTLAILTALRLCAYCCNIVNVSLVKPSFYVYS
RVKNLNSSRVPDLLV
>QNO60397.1 |envelope protein [Severe acute respiratory syndrome coronavirus 2]
MYSFVSEETGTLIVNSVLLFLAFVVFLLVTLAILTALRLCAYCCNIVNVSLVKPSFYVYS
RVKNLNSSRVPDLLV
>QNO60409.1 |envelope protein [Severe acute respiratory syndrome coronavirus 2]
MYSFVSEETGTLIVNSVLLFLAFVVFLLVTLAILTALRLCAYCCNIVNVSLVKPSFYVYS
RVKNLNSSRVPDLLV
>QNO60421.1 |envelope protein [Severe acute respiratory syndrome coronavirus 2]
MYSFVSEETGTLIVNSVLLFLAFVVFLLVTLAILTALRLCAYCCNIVNVSLVKPSFYVYS
RVKNLNSSRVPDLLV
>QNO60433.1 |envelope protein [Severe acute respiratory syndrome coronavirus 2]
MYSFVSEETGTLIVNSVLLFLAFVVFLLVTLAILTALRLCAYCCNIVNVSLVKPSFYVYS
RVKNLNSSRVPDLLV
>QNO60445.1 |envelope protein [Severe acute respiratory syndrome coronavirus 2]
MYSFVSEETGTLIVNSVLLFLAFVVFLLVTLAILTALRLCAYCCNIVNVSLVKPSFYVYS
RVKNLNSSRVPDLLV
>QNO60457.1 |envelope protein [Severe acute respiratory syndrome coronavirus 2]
MYSFVSEETGTLIVNSVLLFLAFVVFLLVTLAILTALRLCAYCCNIVNVSLVKPSFYVYS
RVKNLNSSRVPDLLV
>QNO60469.1 |envelope protein [Severe acute respiratory syndrome coronavirus 2]
MYSFVSEETGTLIVNSVLLFLAFVVFLLVTLAILTALRLCAYCCNIVNVSLVKPSFYVYS
RVKNLNSSRVPDLLV
>QNO60481.1 |envelope protein [Severe acute respiratory syndrome coronavirus 2]
MYSFVSEETGTLIVNSVLLFLAFVVFLLVTLAILTALRLCAYCCNIVNVSLVKPSFYVYS
RVKNLNSSRVPDLLV
>QNO60493.1 |envelope protein [Severe acute respiratory syndrome coronavirus 2]
MYSFVSEETGTLIVNSVLLFLAFVVFLLVTLAILTALRLCAYCCNIVNVSLVKPSFYVYS
RVKNLNSSRVPDLLV
>QNO60505.1 |envelope protein [Severe acute respiratory syndrome coronavirus 2]
MYSFVSEETGTLIVNSVLLFLAFVVFLLVTLAILTALRLCAYCCNIVNVSLVKPSFYVYS
RVKNLNSSRVPDLLV
>QNO60517.1 |envelope protein [Severe acute respiratory syndrome coronavirus 2]
MYSFVSEETGTLIVNSVLLFLAFVVFLLVTLAILTALRLCAYCCNIVNVSLVKPSFYVYS
RVKNLNSSRVPDLLV
>QNO60529.1 |envelope protein [Severe acute respiratory syndrome coronavirus 2]
MYSFVSEETGTLIVNSVLLFLAFVVFLLVTLAILTALRLCAYCCNIVNVSLVKPSFYVYS
RVKNLNSSRVPDLLV
>QNO60541.1 |envelope protein [Severe acute respiratory syndrome coronavirus 2]
MYSFVSEETGTLIVNSVLLFLAFVVFLLVTLAILTALRLCAYCCNIVNVSLVKPSFYVYS
RVKNLNSSRVPDLLV
>QNO60553.1 |envelope protein [Severe acute respiratory syndrome coronavirus 2]
MYSFVSEETGTLIVNSVLLFLAFVVFLLVTLAILTALRLCAYCCNIVNVSLVKPSFYVYS
RVKNLNSSRVPDLLV
>QNO60565.1 |envelope protein [Severe acute respiratory syndrome coronavirus 2]
MYSFVSEETGTLIVNSVLLFLAFVVFLLVTLAILTALRLCAYCCNIVNVSLVKPSFYVYS
RVKNLNSSRVPDLLV
>QNO60577.1 |envelope protein [Severe acute respiratory syndrome coronavirus 2]
MYSFVSEETGTLIVNSVLLFLAFVVFLLVTLAILTALRLCAYCCNIVNVSLVKPSFYVYS
RVKNLNSSRVPDLLV
>QNO60589.1 |envelope protein [Severe acute respiratory syndrome coronavirus 2]
MYSFVSEETGTLIVNSVLLFLAFVVFLLVTLAILTALRLCAYCCNIVNVSLVKPSFYVYS
RVKNLNSSRVPDLLV
>QNO60601.1 |envelope protein [Severe acute respiratory syndrome coronavirus 2]
MYSFVSEETGTLIVNSVLLFLAFVVFLLVTLAILTALRLCAYCCNIVNVSLVKPSFYVYS
RVKNLNSSRVPDLLV
>QNO60613.1 |envelope protein [Severe acute respiratory syndrome coronavirus 2]
MYSFVSEETGTLIVNSVLLFLAFVVFLLVTLAILTALRLCAYCCNIVNVSLVKPSFYVYS
RVKNLNSSRVPDLLV
>QNO60625.1 |envelope protein [Severe acute respiratory syndrome coronavirus 2]
MYSFVSEETGTLIVNSVLLFLAFVVFLLVTLAILTALRLCAYCCNIVNVSLVKPSFYVYS
RVKNLNSSRVPDLLV
>QNO60637.1 |envelope protein [Severe acute respiratory syndrome coronavirus 2]
MYSFVSEETGTLIVNSVLLFLAFVVFLLVTLAILTALRLCAYCCNIVNVSLVKPSFYVYS
RVKNLNSSRVPDLLV
>QNO60649.1 |envelope protein [Severe acute respiratory syndrome coronavirus 2]
MYSFVSEETGTLIVNSVLLFLAFVVFLLVTLAILTALRLCAYCCNIVNVSLVKPSFYVYS
RVKNLNSSRVPDLLV
>QNO60661.1 |envelope protein [Severe acute respiratory syndrome coronavirus 2]
MYSFVSEETGTLIVNSVLLFLAFVVFLLVTLAILTALRLCAYCCNIVNVSLVKPSFYVYS
RVKNLNSSRVPDLLV
>QNO60673.1 |envelope protein [Severe acute respiratory syndrome coronavirus 2]
MYSFVSEETGTLIVNSVLLFLAFVVFLLVTLAILTALRLCAYCCNIVNVSLVKPSFYVYS
RVKNLNSSRVPDLLV
>QNO60685.1 |envelope protein [Severe acute respiratory syndrome coronavirus 2]
MYSFVSEETGTLIVNSVLLFLAFVVFLLVTLAILTALRLCAYCCNIVNVSLVKPSFYVYS
RVKNLNSSRVPDLLV
>QNO60697.1 |envelope protein [Severe acute respiratory syndrome coronavirus 2]
MYSFVSEETGTLIVNSVLLFLAFVVFLLVTLAILTALRLCAYCCNIVNVSLVKPSFYVYS
RVKNLNSSRVPDLLV
>QNO60709.1 |envelope protein [Severe acute respiratory syndrome coronavirus 2]
MYSFVSEETGTLIVNSVLLFLAFVVFLLVTLAILTALRLCAYCCNIVNVSLVKPSFYVYS
RVKNLNSSRVPDLLV
>QNO60721.1 |envelope protein [Severe acute respiratory syndrome coronavirus 2]
MYSFVSEETGTLIVNSVLLFLAFVVFLLVTLAILTALRLCAYCCNIVNVSLVKPSFYVYS
RVKNLNSSRVPDLLV
>QNO60733.1 |envelope protein [Severe acute respiratory syndrome coronavirus 2]
MYSFVSEETGTLIVNSVLLFLAFVVFLLVTLAILTALRLCAYCCNIVNVSLVKPSFYVYS
RVKNLNSSRVPDLLV
>QNO60745.1 |envelope protein [Severe acute respiratory syndrome coronavirus 2]
MYSFVSEETGTLIVNSVLLFLAFVVFLLVTLAILTALRLCAYCCNIVNVSLVKPSFYVYS
RVKNLNSSRVPDLLV
>QNO60757.1 |envelope protein [Severe acute respiratory syndrome coronavirus 2]
MYSFVSEETGTLIVNSVLLFLAFVVFLLVTLAILTALRLCAYCCNIVNVSLVKPSFYVYS
RVKNLNSSRVPDLLV
>QNO60769.1 |envelope protein [Severe acute respiratory syndrome coronavirus 2]
MYSFVSEETGTLIVNSVLLFLAFVVFLLVTLAILTALRLCAYCCNIVNVSLVKPSFYVYS
RVKNLNSSRVPDLLV
>QNO60781.1 |envelope protein [Severe acute respiratory syndrome coronavirus 2]
MYSFVSEETGTLIVNSVLLFLAFVVFLLVTLAILTALRLCAYCCNIVNVSLVKPSFYVYS
RVKNLNSSRVPDLLV
>QNO60793.1 |envelope protein [Severe acute respiratory syndrome coronavirus 2]
MYSFVSEETGTLIVNSVLLFLAFVVFLLVTLAILTALRLCAYCCNIVNVSLVKPSFYVYS
RVKNLNSSRVPDLLV
>QNO60805.1 |envelope protein [Severe acute respiratory syndrome coronavirus 2]
MYSFVSEETGTLIVNSVLLFLAFVVFLLVTLAILTALRLCAYCCNIVNVSLVKPSFYVYS
RVKNLNSSRVPDLLV
>QNO60817.1 |envelope protein [Severe acute respiratory syndrome coronavirus 2]
MYSFVSEETGTLIVNSVLLFLAFVVFLLVTLAILTALRLCAYCCNIVNVSLVKPSFYVYS
RVKNLNSSRVPDLLV
>QNO60829.1 |envelope protein [Severe acute respiratory syndrome coronavirus 2]
MYSFVSEETGTLIVNSVLLFLAFVVFLLVTLAILTALRLCAYCCNIVNVSLVKPSFYVYS
RVKNLNSSRVPDLLV
>QNO60841.1 |envelope protein [Severe acute respiratory syndrome coronavirus 2]
MYSFVSEETGTLIVNSVLLFLAFVVFLLVTLAILTALRLCAYCCNIVNVSLVKPSFYVYS
RVKNLNSSRVPDLLV
>QNO60853.1 |envelope protein [Severe acute respiratory syndrome coronavirus 2]
MYSFVSEETGTLIVNSVLLFLAFVVFLLVTLAILTALRLCAYCCNIVNVSLVKPSFYVYS
RVKNLNSSRVPDLLV
>QNO60865.1 |envelope protein [Severe acute respiratory syndrome coronavirus 2]
MYSFVSEETGTLIVNSVLLFLAFVVFLLVTLAILTALRLCAYCCNIVNVSLVKPSFYVYS
RVKNLNSSRVPDLLV
>QNO60877.1 |envelope protein [Severe acute respiratory syndrome coronavirus 2]
MYSFVSEETGTLIVNSVLLFLAFVVFLLVTLAILTALRLCAYCCNIVNVSLVKPSFYVYS
RVKNLNSSRVPDLLV
>QNO60889.1 |envelope protein [Severe acute respiratory syndrome coronavirus 2]
MYSFVSEETGTLIVNSVLLFLAFVVFLLVTLAILTALRLCAYCCNIVNVSLVKPSFYVYS
RVKNLNSSRVPDLLV
>QNO60901.1 |envelope protein [Severe acute respiratory syndrome coronavirus 2]
MYSFVSEETGTLIVNSVLLFLAFVVFLLVTLAILTALRLCAYCCNIVNVSLVKPSFYVYS
RVKNLNSSRVPDLLV
>QNO60913.1 |envelope protein [Severe acute respiratory syndrome coronavirus 2]
MYSFVSEETGTLIVNSVLLFLAFVVFLLVTLAILTALRLCAYCCNIVNVSLVKPSFYVYS
RVKNLNSSRVPDLLV
>QNO60925.1 |envelope protein [Severe acute respiratory syndrome coronavirus 2]
MYSFVSEETGTLIVNSVLLFLAFVVFLLVTLAILTALRLCAYCCNIVNVSLVKPSFYVYS
RVKNLNSSRVPDLLV
>QNO60937.1 |envelope protein [Severe acute respiratory syndrome coronavirus 2]
MYSFVSEETGTLIVNSVLLFLAFVVFLLVTLAILTALRLCAYCCNIVNVSLVKPSFYVYS
RVKNLNSSRVPDLLV
>QNO60949.1 |envelope protein [Severe acute respiratory syndrome coronavirus 2]
MYSFVSEETGTLIVNSVLLFLAFVVFLLVTLAILTALRLCAYCCNIVNVSLVKPSFYVYS
RVKNLNSSRVPDLLV
>QNO60961.1 |envelope protein [Severe acute respiratory syndrome coronavirus 2]
MYSFVSEETGTLIVNSVLLFLAFVVFLLVTLAILTALRLCAYCCNIVNVSLVKPSFYVYS
RVKNLNSSRVPDLLV
>QNO60973.1 |envelope protein [Severe acute respiratory syndrome coronavirus 2]
MYSFVSEETGTLIVNSVLLFLAFVVFLLVTLAILTALRLCAYCCNIVNVSLVKPSFYVYS
RVKNLNSSRVPDLLV
>QNO60985.1 |envelope protein [Severe acute respiratory syndrome coronavirus 2]
MYSFVSEETGTLIVNSVLLFLAFVVFLLVTLAILTALRLCAYCCNIVNVSLVKPSFYVYS
RVKNLNSSRVPDLLV
>QNO60997.1 |envelope protein [Severe acute respiratory syndrome coronavirus 2]
MYSFVSEETGTLIVNSVLLFLAFVVFLLVTLAILTALRLCAYCCNIVNVSLVKPSFYVYS
RVKNLNSSRVPDLLV
>QNO61009.1 |envelope protein [Severe acute respiratory syndrome coronavirus 2]
MYSFVSEETGTLIVNSVLLFLAFVVFLLVTLAILTALRLCAYCCNIVNVSLVKPSFYVYS
RVKNLNSSRVPDLLV
>QNO61021.1 |envelope protein [Severe acute respiratory syndrome coronavirus 2]
MYSFVSEETGTLIVNSVLLFLAFVVFLLVTLAILTALRLCAYCCNIVNVSLVKPSFYVYS
RVKNLNSSRVPDLLV
>QNO61033.1 |envelope protein [Severe acute respiratory syndrome coronavirus 2]
MYSFVSEETGTLIVNSVLLFLAFVVFLLVTLAILTALRLCAYCCNIVNVSLVKPSFYVYS
RVKNLNSSRVPDLLV
>QNO61045.1 |envelope protein [Severe acute respiratory syndrome coronavirus 2]
MYSFVSEETGTLIVNSVLLFLAFVVFLLVTLAILTALRLCAYCCNIVNVSLVKPSFYVYS
RVKNLNSSRVPDLLV
>QNO61057.1 |envelope protein [Severe acute respiratory syndrome coronavirus 2]
MYSFVSEETGTLIVNSVLLFLAFVVFLLVTLAILTALRLCAYCCNIVNVSLVKPSFYVYS
RVKNLNSSRVPDLLV
>QNO61069.1 |envelope protein [Severe acute respiratory syndrome coronavirus 2]
MYSFVSEETGTLIVNSVLLFLAFVVFLLVTLAILTALRLCAYCCNIVNVSLVKPSFYVYS
RVKNLNSSRVPDLLV
>QNO61081.1 |envelope protein [Severe acute respiratory syndrome coronavirus 2]
MYSFVSEETGTLIVNSVLLFLAFVVFLLVTLAILTALRLCAYCCNIVNVSLVKPSFYVYS
RVKNLNSSRVPDLLV
>QNO61093.1 |envelope protein [Severe acute respiratory syndrome coronavirus 2]
MYSFVSEETGTLIVNSVLLFLAFVVFLLVTLAILTALRLCAYCCNIVNVSLVKPSFYVYS
RVKNLNSSRVPDLLV
>QNO61105.1 |envelope protein [Severe acute respiratory syndrome coronavirus 2]
MYSFVSEETGTLIVNSVLLFLAFVVFLLVTLAILTALRLCAYCCNIVNVSLVKPSFYVYS
RVKNLNSSRVPDLLV
>QNO61117.1 |envelope protein [Severe acute respiratory syndrome coronavirus 2]
MYSFVSEETGTLIVNSVLLFLAFVVFLLVTLAILTALRLCAYCCNIVNVSLVKPSFYVYS
RVKNLNSSRVPDLLV
>QNO61129.1 |envelope protein [Severe acute respiratory syndrome coronavirus 2]
MYSFVSEETGTLIVNSVLLFLAFVVFLLVTLAILTALRLCAYCCNIVNVSLVKPSFYVYS
RVKNLNSSRVPDLLV
>QNO61141.1 |envelope protein [Severe acute respiratory syndrome coronavirus 2]
MYSFVSEETGTLIVNSVLLFLAFVVFLLVTLAILTALRLCAYCCNIVNVSLVKPSFYVYS
RVKNLNSSRVPDLLV
>QNO61153.1 |envelope protein [Severe acute respiratory syndrome coronavirus 2]
MYSFVSEETGTLIVNSVLLFLAFVVFLLVTLAILTALRLCAYCCNIVNVSLVKPSFYVYS
RVKNLNSSRVPDLLV
>QNO61165.1 |envelope protein [Severe acute respiratory syndrome coronavirus 2]
MYSFVSEETGTLIVNSVLLFLAFVVFLLVTLAILTALRLCAYCCNIVNVSLVKPSFYVYS
RVKNLNSSRVPDLLV
>QNO61177.1 |envelope protein [Severe acute respiratory syndrome coronavirus 2]
MYSFVSEETGTLIVNSVLLFLAFVVFLLVTLAILTALRLCAYCCNIVNVSLVKPSFYVYS
RVKNLNSSRVPDLLV
>QNO61189.1 |envelope protein [Severe acute respiratory syndrome coronavirus 2]
MYSFVSEETGTLIVNSVLLFLAFVVFLLVTLAILTALRLCAYCCNIVNVSLVKPSFYVYS
RVKNLNSSRVPDLLV
>QNO61201.1 |envelope protein [Severe acute respiratory syndrome coronavirus 2]
MYSFVSEETGTLIVNSVLLFLAFVVFLLVTLAILTALRLCAYCCNIVNVSLVKPSFYVYS
RVKNLNSSRVPDLLV
>QNO61213.1 |envelope protein [Severe acute respiratory syndrome coronavirus 2]
MYSFVSEETGTLIVNSVLLFLAFVVFLLVTLAILTALRLCAYCCNIVNVSLVKPSFYVYS
RVKNLNSSRVPDLLV
>QNO61225.1 |envelope protein [Severe acute respiratory syndrome coronavirus 2]
MYSFVSEETGTLIVNSVLLFLAFVVFLLVTLAILTALRLCAYCCNIVNVSLVKPSFYVYS
RVKNLNSSRVPDLLV
>QNO61237.1 |envelope protein [Severe acute respiratory syndrome coronavirus 2]
MYSFVSEETGTLIVNSVLLFLAFVVFLLVTLAILTALRLCAYCCNIVNVSLVKPSFYVYS
RVKNLNSSRVPDLLV
>QNO61249.1 |envelope protein [Severe acute respiratory syndrome coronavirus 2]
MYSFVSEETGTLIVNSVLLFLAFVVFLLVTLAILTALRLCAYCCNIVNVSLVKPSFYVYS
RVKNLNSSRVPDLLV
>QNO61261.1 |envelope protein [Severe acute respiratory syndrome coronavirus 2]
MYSFVSEETGTLIVNSVLLFLAFVVFLLVTLAILTALRLCAYCCNIVNVSLVKPSFYVYS
RVKNLNSSRVPDLLV
>QNO61273.1 |envelope protein [Severe acute respiratory syndrome coronavirus 2]
MYSFVSEETGTLIVNSVLLFLAFVVFLLVTLAILTALRLCAYCCNIVNVSLVKPSFYVYS
RVKNLNSSRVPDLLV
>QNO61285.1 |envelope protein [Severe acute respiratory syndrome coronavirus 2]
MYSFVSEETGTLIVNSVLLFLAFVVFLLVTLAILTALRLCAYCCNIVNVSLVKPSFYVYS
RVKNLNSSRVPDLLV
>QNO61297.1 |envelope protein [Severe acute respiratory syndrome coronavirus 2]
MYSFVSEETGTLIVNSVLLFLAFVVFLLVTLAILTALRLCAYCCNIVNVSLVKPSFYVYS
RVKNLNSSRVPDLLV
>QNO61309.1 |envelope protein [Severe acute respiratory syndrome coronavirus 2]
MYSFVSEETGTLIVNSVLLFLAFVVFLLVTLAILTALRLCAYCCNIVNVSLVKPSFYVYS
RVKNLNSSRVPDLLV
>QNO61321.1 |envelope protein [Severe acute respiratory syndrome coronavirus 2]
MYSFVSEETGTLIVNSVLLFLAFVVFLLVTLAILTALRLCAYCCNIVNVSLVKPSFYVYS
RVKNLNSSRVPDLLV
>QNO61333.1 |envelope protein [Severe acute respiratory syndrome coronavirus 2]
MYSFVSEETGTLIVNSVLLFLAFVVFLLVTLAILTALRLCAYCCNIVNVSLVKPSFYVYS
RVKNLNSSRVPDLLV
>QNO61345.1 |envelope protein [Severe acute respiratory syndrome coronavirus 2]
MYSFVSEETGTLIVNSVLLFLAFVVFLLVTLAILTALRLCAYCCNIVNVSLVKPSFYVYS
RVKNLNSSRVPDLLV
>QNO61357.1 |envelope protein [Severe acute respiratory syndrome coronavirus 2]
MYSFVSEETGTLIVNSVLLFLAFVVFLLVTLAILTALRLCAYCCNIVNVSLVKPSFYVYS
RVKNLNSSRVPDLLV
>QNO61369.1 |envelope protein [Severe acute respiratory syndrome coronavirus 2]
MYSFVSEETGTLIVNSVLLFLAFVVFLLVTLAILTALRLCAYCCNIVNVSLVKPSFYVYS
RVKNLNSSRVPDLLV
>QNO61381.1 |envelope protein [Severe acute respiratory syndrome coronavirus 2]
MYSFVSEETGTLIVNSVLLFLAFVVFLLVTLAILTALRLCAYCCNIVNVSLVKPSFYVYS
RVKNLNSSRVPDLLV
>QNO61393.1 |envelope protein [Severe acute respiratory syndrome coronavirus 2]
MYSFVSEETGTLIVNSVLLFLAFVVFLLVTLAILTALRLCAYCCNIVNVSLVKPSFYVYS
RVKNLNSSRVPDLLV
>QNO61405.1 |envelope protein [Severe acute respiratory syndrome coronavirus 2]
MYSFVSEETGTLIVNSVLLFLAFVVFLLVTLAILTALRLCAYCCNIVNVSLVKPSFYVYS
RVKNLNSSRVPDLLV
>QNO61417.1 |envelope protein [Severe acute respiratory syndrome coronavirus 2]
MYSFVSEETGTLIVNSVLLFLAFVVFLLVTLAILTALRLCAYCCNIVNVSLVKPSFYVYS
RVKNLNSSRVPDLLV
>QNO61429.1 |envelope protein [Severe acute respiratory syndrome coronavirus 2]
MYSFVSEETGTLIVNSVLLFLAFVVFLLVTLAILTALRLCAYCCNIVNVSLVKPSFYVYS
RVKNLNSSRVPDLLV
>QNO61441.1 |envelope protein [Severe acute respiratory syndrome coronavirus 2]
MYSFVSEETGTLIVNSVLLFLAFVVFLLVTLAILTALRLCAYCCNIVNVSLVKPSFYVYS
RVKNLNSSRVPDLLV
>QNO61453.1 |envelope protein [Severe acute respiratory syndrome coronavirus 2]
MYSFVSEETGTLIVNSVLLFLAFVVFLLVTLAILTALRLCAYCCNIVNVSLVKPSFYVYS
RVKNLNSSRVPDLLV
>QNO61465.1 |envelope protein [Severe acute respiratory syndrome coronavirus 2]
MYSFVSEETGTLIVNSVLLFLAFVVFLLVTLAILTALRLCAYCCNIVNVSLVKPSFYVYS
RVKNLNSSRVPDLLV
>QNO61477.1 |envelope protein [Severe acute respiratory syndrome coronavirus 2]
MYSFVSEETGTLIVNSVLLFLAFVVFLLVTLAILTALRLCAYCCNIVNVSLVKPSFYVYS
RVKNLNSSRVPDLLV
>QNO61489.1 |envelope protein [Severe acute respiratory syndrome coronavirus 2]
MYSFVSEETGTLIVNSVLLFLAFVVFLLVTLAILTALRLCAYCCNIVNVSLVKPSFYVYS
RVKNLNSSRVPDLLV
>QNO61501.1 |envelope protein [Severe acute respiratory syndrome coronavirus 2]
MYSFVSEETGTLIVNSVLLFLAFVVFLLVTLAILTALRLCAYCCNIVNVSLVKPSFYVYS
RVKNLNSSRVPDLLV
>QNO61513.1 |envelope protein [Severe acute respiratory syndrome coronavirus 2]
MYSFVSEETGTLIVNSVLLFLAFVVFLLVTLAILTALRLCAYCCNIVNVSLVKPSFYVYS
RVKNLNSSRVPDLLV
>QNO61525.1 |envelope protein [Severe acute respiratory syndrome coronavirus 2]
MYSFVSEETGTLIVNSVLLFLAFVVFLLVTLAILTALRLCAYCCNIVNVSLVKPSFYVYS
RVKNLNSSRVPDLLV
>QNO61537.1 |envelope protein [Severe acute respiratory syndrome coronavirus 2]
MYSFVSEETGTLIVNSVLLFLAFVVFLLVTLAILTALRLCAYCCNIVNVSLVKPSFYVYS
RVKNLNSSRVPDLLV
>QNO61549.1 |envelope protein [Severe acute respiratory syndrome coronavirus 2]
MYSFVSEETGTLIVNSVLLFLAFVVFLLVTLAILTALRLCAYCCNIVNVSLVKPSFYVYS
RVKNLNSSRVPDLLV
>QNO61561.1 |envelope protein [Severe acute respiratory syndrome coronavirus 2]
MYSFVSEETGTLIVNSVLLFLAFVVFLLVTLAILTALRLCAYCCNIVNVSLVKPSFYVYS
RVKNLNSSRVPDLLV
>QNO61573.1 |envelope protein [Severe acute respiratory syndrome coronavirus 2]
MYSFVSEETGTLIVNSVLLFLAFVVFLLVTLAILTALRLCAYCCNIVNVSLVKPSFYVYS
RVKNLNSSRVPDLLV
>QNO61585.1 |envelope protein [Severe acute respiratory syndrome coronavirus 2]
MYSFVSEETGTLIVNSVLLFLAFVVFLLVTLAILTALRLCAYCCNIVNVSLVKPSFYVYS
RVKNLNSSRVPDLLV
>QNO61597.1 |envelope protein [Severe acute respiratory syndrome coronavirus 2]
MYSFVSEETGTLIVNSVLLFLAFVVFLLVTLAILTALRLCAYCCNIVNVSLVKPSFYVYS
RVKNLNSSRVPDLLV
>QNO61609.1 |envelope protein [Severe acute respiratory syndrome coronavirus 2]
MYSFVSEETGTLIVNSVLLFLAFVVFLLVTLAILTALRLCAYCCNIVNVSLVKPSFYVYS
RVKNLNSSRVPDLLV
>QNO61621.1 |envelope protein [Severe acute respiratory syndrome coronavirus 2]
MYSFVSEETGTLIVNSVLLFLAFVVFLLVTLAILTALRLCAYCCNIVNVSLVKPSFYVYS
RVKNLNSSRVPDLLV
>QNO61633.1 |envelope protein [Severe acute respiratory syndrome coronavirus 2]
MYSFVSEETGTLIVNSVLLFLAFVVFLLVTLAILTALRLCAYCCNIVNVSLVKPSFYVYS
RVKNLNSSRVPDLLV
>QNO61645.1 |envelope protein [Severe acute respiratory syndrome coronavirus 2]
MYSFVSEETGTLIVNSVLLFLAFVVFLLVTLAILTALRLCAYCCNIVNVSLVKPSFYVYS
RVKNLNSSRVPDLLV
>QNO61657.1 |envelope protein [Severe acute respiratory syndrome coronavirus 2]
MYSFVSEETGTLIVNSVLLFLAFVVFLLVTLAILTALRLCAYCCNIVNVSLVKPSFYVYS
RVKNLNSSRVPDLLV
>QNO61669.1 |envelope protein [Severe acute respiratory syndrome coronavirus 2]
MYSFVSEETGTLIVNSVLLFLAFVVFLLVTLAILTALRLCAYCCNIVNVSLVKPSFYVYS
RVKNLNSSRVPDLLV
>QNO61681.1 |envelope protein [Severe acute respiratory syndrome coronavirus 2]
MYSFVSEETGTLIVNSVLLFLAFVVFLLVTLAILTALRLCAYCCNIVNVSLVKPSFYVYS
RVKNLNSSRVPDLLV
>QNO61693.1 |envelope protein [Severe acute respiratory syndrome coronavirus 2]
MYSFVSEETGTLIVNSVLLFLAFVVFLLVTLAILTALRLCAYCCNIVNVSLVKPSFYVYS
RVKNLNSSRVPDLLV
>QNO61705.1 |envelope protein [Severe acute respiratory syndrome coronavirus 2]
MYSFVSEETGTLIVNSVLLFLAFVVFLLVTLAILTALRLCAYCCNIVNVSLVKPSFYVYS
RVKNLNSSRVPDLLV
>QNO61717.1 |envelope protein [Severe acute respiratory syndrome coronavirus 2]
MYSFVSEETGTLIVNSVLLFLAFVVFLLVTLAILTALRLCAYCCNIVNVSLVKPSFYVYS
RVKNLNSSRVPDLLV
>QNO61729.1 |envelope protein [Severe acute respiratory syndrome coronavirus 2]
MYSFVSEETGTLIVNSVLLFLAFVVFLLVTLAILTALRLCAYCCNIVNVSLVKPSFYVYS
RVKNLNSSRVPDLLV
>QNO61741.1 |envelope protein [Severe acute respiratory syndrome coronavirus 2]
MYSFVSEETGTLIVNSVLLFLAFVVFLLVTLAILTALRLCAYCCNIVNVSLVKPSFYVYS
RVKNLNSSRVPDLLV
>QNO61753.1 |envelope protein [Severe acute respiratory syndrome coronavirus 2]
MYSFVSEETGTLIVNSVLLFLAFVVFLLVTLAILTALRLCAYCCNIVNVSLVKPSFYVYS
RVKNLNSSRVPDLLV
>QNO61765.1 |envelope protein [Severe acute respiratory syndrome coronavirus 2]
MYSFVSEETGTLIVNSVLLFLAFVVFLLVTLAILTALRLCAYCCNIVNVSLVKPSFYVYS
RVKNLNSSRVPDLLV
>QNO61777.1 |envelope protein [Severe acute respiratory syndrome coronavirus 2]
MYSFVSEETGTLIVNSVLLFLAFVVFLLVTLAILTALRLCAYCCNIVNVSLVKPSFYVYS
RVKNLNSSRVPDLLV
>QNO61789.1 |envelope protein [Severe acute respiratory syndrome coronavirus 2]
MYSFVSEETGTLIVNSVLLFLAFVVFLLVTLAILTALRLCAYCCNIVNVSLVKPSFYVYS
RVKNLNSSRVPDLLV
>QNO61801.1 |envelope protein [Severe acute respiratory syndrome coronavirus 2]
MYSFVSEETGTLIVNSVLLFLAFVVFLLVTLAILTALRLCAYCCNIVNVSLVKPSFYVYS
RVKNLNSSRVPDLLV
>QNO61813.1 |envelope protein [Severe acute respiratory syndrome coronavirus 2]
MYSFVSEETGTLIVNSVLLFLAFVVFLLVTLAILTALRLCAYCCNIVNVSLVKPSFYVYS
RVKNLNSSRVPDLLV
>QNO61825.1 |envelope protein [Severe acute respiratory syndrome coronavirus 2]
MYSFVSEETGTLIVNSVLLFLAFVVFLLVTLAILTALRLCAYCCNIVNVSLVKPSFYVYS
RVKNLNSSRVPDLLV
>QNO61837.1 |envelope protein [Severe acute respiratory syndrome coronavirus 2]
MYSFVSEETGTLIVNSVLLFLAFVVFLLVTLAILTALRLCAYCCNIVNVSLVKPSFYVYS
RVKNLNSSRVPDLLV
>QNO61849.1 |envelope protein [Severe acute respiratory syndrome coronavirus 2]
MYSFVSEETGTLIVNSVLLFLAFVVFLLVTLAILTALRLCAYCCNIVNVSLVKPSFYVYS
RVKNLNSSRVPDLLV
>QNO61861.1 |envelope protein [Severe acute respiratory syndrome coronavirus 2]
MYSFVSEETGTLIVNSVLLFLAFVVFLLVTLAILTALRLCAYCCNIVNVSLVKPSFYVYS
RVKNLNSSRVPDLLV
>QNO61873.1 |envelope protein [Severe acute respiratory syndrome coronavirus 2]
MYSFVSEETGTLIVNSVLLFLAFVVFLLVTLAILTALRLCAYCCNIVNVSLVKPSFYVYS
RVKNLNSSRVPDLLV
>QNO61885.1 |envelope protein [Severe acute respiratory syndrome coronavirus 2]
MYSFVSEETGTLIVNSVLLFLAFVVFLLVTLAILTALRLCAYCCNIVNVSLVKPSFYVYS
RVKNLNSSRVPDLLV
>QNO61897.1 |envelope protein [Severe acute respiratory syndrome coronavirus 2]
MYSFVSEETGTLIVNSVLLFLAFVVFLLVTLAILTALRLCAYCCNIVNVSLVKPSFYVYS
RVKNLNSSRVPDLLV
>QNO61909.1 |envelope protein [Severe acute respiratory syndrome coronavirus 2]
MYSFVSEETGTLIVNSVLLFLAFVVFLLVTLAILTALRLCAYCCNIVNVSLVKPSFYVYS
RVKNLNSSRVPDLLV
>QNO61921.1 |envelope protein [Severe acute respiratory syndrome coronavirus 2]
MYSFVSEETGTLIVNSVLLFLAFVVFLLVTLAILTALRLCAYCCNIVNVSLVKPSFYVYS
RVKNLNSSRVPDLLV
>QNO61933.1 |envelope protein [Severe acute respiratory syndrome coronavirus 2]
MYSFVSEETGTLIVNSVLLFLAFVVFLLVTLAILTALRLCAYCCNIVNVSLVKPSFYVYS
RVKNLNSSRVPDLLV
>QNO61945.1 |envelope protein [Severe acute respiratory syndrome coronavirus 2]
MYSFVSEETGTLIVNSVLLFLAFVVFLLVTLAILTALRLCAYCCNIVNVSLVKPSFYVYS
RVKNLNSSRVPDLLV
>QNO61957.1 |envelope protein [Severe acute respiratory syndrome coronavirus 2]
MYSFVSEETGTLIVNSVLLFLAFVVFLLVTLAILTALRLCAYCCNIVNVSLVKPSFYVYS
RVKNLNSSRVPDLLV
>QNO61969.1 |envelope protein [Severe acute respiratory syndrome coronavirus 2]
MYSFVSEETGTLIVNSVLLFLAFVVFLLVTLAILTALRLCAYCCNIVNVSLVKPSFYVYS
RVKNLNSSRVPDLLV
>QNO61981.1 |envelope protein [Severe acute respiratory syndrome coronavirus 2]
MYSFVSEETGTLIVNSVLLFLAFVVFLLVTLAILTALRLCAYCCNIVNVSLVKPSFYVYS
RVKNLNSSRVPDLLV
>QNO61993.1 |envelope protein [Severe acute respiratory syndrome coronavirus 2]
MYSFVSEETGTLIVNSVLLFLAFVVFLLVTLAILTALRLCAYCCNIVNVSLVKPSFYVYS
RVKNLNSSRVPDLLV
>QNO62005.1 |envelope protein [Severe acute respiratory syndrome coronavirus 2]
MYSFVSEETGTLIVNSVLLFLAFVVFLLVTLAILTALRLCAYCCNIVNVSLVKPSFYVYS
RVKNLNSSRVPDLLV
>QNO62017.1 |envelope protein [Severe acute respiratory syndrome coronavirus 2]
MYSFVSEETGTLIVNSVLLFLAFVVFLLVTLAILTALRLCAYCCNIVNVSLVKPSFYVYS
RVKNLNSSRVPDLLV
>QNO62029.1 |envelope protein [Severe acute respiratory syndrome coronavirus 2]
MYSFVSEETGTLIVNSVLLFLAFVVFLLVTLAILTALRLCAYCCNIVNVSLVKPSFYVYS
RVKNLNSSRVPDLLV
>QNO62041.1 |envelope protein [Severe acute respiratory syndrome coronavirus 2]
MYSFVSEETGTLIVNSVLLFLAFVVFLLVTLAILTALRLCAYCCNIVNVSLVKPSFYVYS
RVKNLNSSRVPDLLV
>QNO62053.1 |envelope protein [Severe acute respiratory syndrome coronavirus 2]
MYSFVSEETGTLIVNSVLLFLAFVVFLLVTLAILTALRLCAYCCNIVNVSLVKPSFYVYS
RVKNLNSSRVPDLLV
>QNO62065.1 |envelope protein [Severe acute respiratory syndrome coronavirus 2]
MYSFVSEETGTLIVNSVLLFLAFVVFLLVTLAILTALRLCAYCCNIVNVSLVKPSFYVYS
RVKNLNSSRVPDLLV
>QNO62077.1 |envelope protein [Severe acute respiratory syndrome coronavirus 2]
MYSFVSEETGTLIVNSVLLFLAFVVFLLVTLAILTALRLCAYCCNIVNVSLVKPSFYVYS
RVKNLNSSRVPDLLV
>QNO62089.1 |envelope protein [Severe acute respiratory syndrome coronavirus 2]
MYSFVSEETGTLIVNSVLLFLAFVVFLLVTLAILTALRLCAYCCNIVNVSLVKPSFYVYS
RVKNLNSSRVPDLLV
>QNO62101.1 |envelope protein [Severe acute respiratory syndrome coronavirus 2]
MYSFVSEETGTLIVNSVLLFLAFVVFLLVTLAILTALRLCAYCCNIVNVSLVKPSFYVYS
RVKNLNSSRVPDLLV
>QNO62113.1 |envelope protein [Severe acute respiratory syndrome coronavirus 2]
MYSFVSEETGTLIVNSVLLFLAFVVFLLVTLAILTALRLCAYCCNIVNVSLVKPSFYVYS
RVKNLNSSRVPDLLV
>QNO62125.1 |envelope protein [Severe acute respiratory syndrome coronavirus 2]
MYSFVSEETGTLIVNSVLLFLAFVVFLLVTLAILTALRLCAYCCNIVNVSLVKPSFYVYS
RVKNLNSSRVPDLLV
>QNO62137.1 |envelope protein [Severe acute respiratory syndrome coronavirus 2]
MYSFVSEETGTLIVNSVLLFLAFVVFLLVTLAILTALRLCAYCCNIVNVSLVKPSFYVYS
RVKNLNSSRVPDLLV
>QNO62149.1 |envelope protein [Severe acute respiratory syndrome coronavirus 2]
MYSFVSEETGTLIVNSVLLFLAFVVFLLVTLAILTALRLCAYCCNIVNVSLVKPSFYVYS
RVKNLNSSRVPDLLV
>QNO62161.1 |envelope protein [Severe acute respiratory syndrome coronavirus 2]
MYSFVSEETGTLIVNSVLLFLAFVVFLLVTLAILTALRLCAYCCNIVNVSLVKPSFYVYS
RVKNLNSSRVPDLLV
>QNO62173.1 |envelope protein [Severe acute respiratory syndrome coronavirus 2]
MYSFVSEETGTLIVNSVLLFLAFVVFLLVTLAILTALRLCAYCCNIVNVSLVKPSFYVYS
RVKNLNSSRVPDLLV
>QNO62185.1 |envelope protein [Severe acute respiratory syndrome coronavirus 2]
MYSFVSEETGTLIVNSVLLFLAFVVFLLVTLAILTALRLCAYCCNIVNVSLVKPSFYVYS
RVKNLNSSRVPDLLV
>QNO62197.1 |envelope protein [Severe acute respiratory syndrome coronavirus 2]
MYSFVSEETGTLIVNSVLLFLAFVVFLLVTLAILTALRLCAYCCNIVNVSLVKPSFYVYS
RVKNLNSSRVPDLLV
>QNO62209.1 |envelope protein [Severe acute respiratory syndrome coronavirus 2]
MYSFVSEETGTLIVNSVLLFLAFVVFLLVTLAILTALRLCAYCCNIVNVSLVKPSFYVYS
RVKNLNSSRVPDLLV
>QNO62221.1 |envelope protein [Severe acute respiratory syndrome coronavirus 2]
MYSFVSEETGTLIVNSVLLFLAFVVFLLVTLAILTALRLCAYCCNIVNVSLVKPSFYVYS
RVKNLNSSRVPDLLV
>QNO62233.1 |envelope protein [Severe acute respiratory syndrome coronavirus 2]
MYSFVSEETGTLIVNSVLLFLAFVVFLLVTLAILTALRLCAYCCNIVNVSLVKPSFYVYS
RVKNLNSSRVPDLLV
>QNO62245.1 |envelope protein [Severe acute respiratory syndrome coronavirus 2]
MYSFVSEETGTLIVNSVLLFLAFVVFLLVTLAILTALRLCAYCCNIVNVSLVKPSFYVYS
RVKNLNSSRVPDLLV
>QNO62257.1 |envelope protein [Severe acute respiratory syndrome coronavirus 2]
MYSFVSEETGTLIVNSVLLFLAFVVFLLVTLAILTALRLCAYCCNIVNVSLVKPSFYVYS
RVKNLNSSRVPDLLV
>QNO62269.1 |envelope protein [Severe acute respiratory syndrome coronavirus 2]
MYSFVSEETGTLIVNSVLLFLAFVVFLLVTLAILTALRLCAYCCNIVNVSLVKPSFYVYS
RVKNLNSSRVPDLLV
>QNO62281.1 |envelope protein [Severe acute respiratory syndrome coronavirus 2]
MYSFVSEETGTLIVNSVLLFLAFVVFLLVTLAILTALRLCAYCCNIVNVSLVKPSFYVYS
RVKNLNSSRVPDLLV
>QNO62293.1 |envelope protein [Severe acute respiratory syndrome coronavirus 2]
MYSFVSEETGTLIVNSVLLFLAFVVFLLVTLAILTALRLCAYCCNIVNVSLVKPSFYVYS
RVKNLNSSRVPDLLV
>QNO62305.1 |envelope protein [Severe acute respiratory syndrome coronavirus 2]
MYSFVSEETGTLIVNSVLLFLAFVVFLLVTLAILTALRLCAYCCNIVNVSLVKPSFYVYS
RVKNLNSSRVPDLLV
>QNO62317.1 |envelope protein [Severe acute respiratory syndrome coronavirus 2]
MYSFVSEETGTLIVNSVLLFLAFVVFLLVTLAILTALRLCAYCCNIVNVSLVKPSFYVYS
RVKNLNSSRVPDLLV
>QNO62329.1 |envelope protein [Severe acute respiratory syndrome coronavirus 2]
MYSFVSEETGTLIVNSVLLFLAFVVFLLVTLAILTALRLCAYCCNIVNVSLVKPSFYVYS
RVKNLNSSRVPDLLV
>QNO62341.1 |envelope protein [Severe acute respiratory syndrome coronavirus 2]
MYSFVSEETGTLIVNSVLLFLAFVVFLLVTLAILTALRLCAYCCNIVNVSLVKPSFYVYS
RVKNLNSSRVPDLLV
>QNO62353.1 |envelope protein [Severe acute respiratory syndrome coronavirus 2]
MYSFVSEETGTLIVNSVLLFLAFVVFLLVTLAILTALRLCAYCCNIVNVSLVKPSFYVYS
RVKNLNSSRVPDLLV
>QNO62365.1 |envelope protein [Severe acute respiratory syndrome coronavirus 2]
MYSFVSEETGTLIVNSVLLFLAFVVFLLVTLAILTALRLCAYCCNIVNVSLVKPSFYVYS
RVKNLNSSRVPDLLV
>QNO62377.1 |envelope protein [Severe acute respiratory syndrome coronavirus 2]
MYSFVSEETGTLIVNSVLLFLAFVVFLLVTLAILTALRLCAYCCNIVNVSLVKPSFYVYS
RVKNLNSSRVPDLLV
>QNO62389.1 |envelope protein [Severe acute respiratory syndrome coronavirus 2]
MYSFVSEETGTLIVNSVLLFLAFVVFLLVTLAILTALRLCAYCCNIVNVSLVKPSFYVYS
RVKNLNSSRVPDLLV
>QNO62401.1 |envelope protein [Severe acute respiratory syndrome coronavirus 2]
MYSFVSEETGTLIVNSVLLFLAFVVFLLVTLAILTALRLCAYCCNIVNVSLVKPSFYVYS
RVKNLNSSRVPDLLV
>QNO62413.1 |envelope protein [Severe acute respiratory syndrome coronavirus 2]
MYSFVSEETGTLIVNSVLLFLAFVVFLLVTLAILTALRLCAYCCNIVNVSLVKPSFYVYS
RVKNLNSSRVPDLLV
>QNO62425.1 |envelope protein [Severe acute respiratory syndrome coronavirus 2]
MYSFVSEETGTLIVNSVLLFLAFVVFLLVTLAILTALRLCAYCCNIVNVSLVKPSFYVYS
RVKNLNSSRVPDLLV
>QNO62437.1 |envelope protein [Severe acute respiratory syndrome coronavirus 2]
MYSFVSEETGTLIVNSVLLFLAFVVFLLVTLAILTALRLCAYCCNIVNVSLVKPSFYVYS
RVKNLNSSRVPDLLV
>QNO62449.1 |envelope protein [Severe acute respiratory syndrome coronavirus 2]
MYSFVSEETGTLIVNSVLLFLAFVVFLLVTLAILTALRLCAYCCNIVNVSLVKPSFYVYS
RVKNLNSSRVPDLLV
>QNO62461.1 |envelope protein [Severe acute respiratory syndrome coronavirus 2]
MYSFVSEETGTLIVNSVLLFLAFVVFLLVTLAILTALRLCAYCCNIVNVSLVKPSFYVYS
RVKNLNSSRVPDLLV
>QNO62473.1 |envelope protein [Severe acute respiratory syndrome coronavirus 2]
MYSFVSEETGTLIVNSVLLFLAFVVFLLVTLAILTALRLCAYCCNIVNVSLVKPSFYVYS
RVKNLNSSRVPDLLV
>QNO62485.1 |envelope protein [Severe acute respiratory syndrome coronavirus 2]
MYSFVSEETGTLIVNSVLLFLAFVVFLLVTLAILTALRLCAYCCNIVNVSLVKPSFYVYS
RVKNLNSSRVPDLLV
>QNO62497.1 |envelope protein [Severe acute respiratory syndrome coronavirus 2]
MYSFVSEETGTLIVNSVLLFLAFVVFLLVTLAILTALRLCAYCCNIVNVSLVKPSFYVYS
RVKNLNSSRVPDLLV
>QNO62509.1 |envelope protein [Severe acute respiratory syndrome coronavirus 2]
MYSFVSEETGTLIVNSVLLFLAFVVFLLVTLAILTALRLCAYCCNIVNVSLVKPSFYVYS
RVKNLNSSRVPDLLV
>QNO62521.1 |envelope protein [Severe acute respiratory syndrome coronavirus 2]
MYSFVSEETGTLIVNSVLLFLAFVVFLLVTLAILTALRLCAYCCNIVNVSLVKPSFYVYS
RVKNLNSSRVPDLLV
>QNO62533.1 |envelope protein [Severe acute respiratory syndrome coronavirus 2]
MYSFVSEETGTLIVNSVLLFLAFVVFLLVTLAILTALRLCAYCCNIVNVSLVKPSFYVYS
RVKNLNSSRVPDLLV
>QNO62545.1 |envelope protein [Severe acute respiratory syndrome coronavirus 2]
MYSFVSEETGTLIVNSVLLFLAFVVFLLVTLAILTALRLCAYCCNIVNVSLVKPSFYVYS
RVKNLNSSRVPDLLV
>QNO62557.1 |envelope protein [Severe acute respiratory syndrome coronavirus 2]
MYSFVSEETGTLIVNSVLLFLAFVVFLLVTLAILTALRLCAYCCNIVNVSLVKPSFYVYS
RVKNLNSSRVPDLLV
>QNO62569.1 |envelope protein [Severe acute respiratory syndrome coronavirus 2]
MYSFVSEETGTLIVNSVLLFLAFVVFLLVTLAILTALRLCAYCCNIVNVSLVKPSFYVYS
RVKNLNSSRVPDLLV
>QNO62581.1 |envelope protein [Severe acute respiratory syndrome coronavirus 2]
MYSFVSEETGTLIVNSVLLFLAFVVFLLVTLAILTALRLCAYCCNIVNVSLVKPSFYVYS
RVKNLNSSRVPDLLV
>QNO62593.1 |envelope protein [Severe acute respiratory syndrome coronavirus 2]
MYSFVSEETGTLIVNSVLLFLAFVVFLLVTLAILTALRLCAYCCNIVNVSLVKPSFYVYS
RVKNLNSSRVPDLLV
>QNO62605.1 |envelope protein [Severe acute respiratory syndrome coronavirus 2]
MYSFVSEETGTLIVNSVLLFLAFVVFLLVTLAILTALRLCAYCCNIVNVSLVKPSFYVYS
RVKNLNSSRVPDLLV
>QNO62617.1 |envelope protein [Severe acute respiratory syndrome coronavirus 2]
MYSFVSEETGTLIVNSVLLFLAFVVFLLVTLAILTALRLCAYCCNIVNVSLVKPSFYVYS
RVKNLNSSRVPDLLV
>QNO62629.1 |envelope protein [Severe acute respiratory syndrome coronavirus 2]
MYSFVSEETGTLIVNSVLLFLAFVVFLLVTLAILTALRLCAYCCNIVNVSLVKPSFYVYS
RVKNLNSSRVPDLLV
>QNO62641.1 |envelope protein [Severe acute respiratory syndrome coronavirus 2]
MYSFVSEETGTLIVNSVLLFLAFVVFLLVTLAILTALRLCAYCCNIVNVSLVKPSFYVYS
RVKNLNSSRVPDLLV
>QNO62653.1 |envelope protein [Severe acute respiratory syndrome coronavirus 2]
MYSFVSEETGTLIVNSVLLFLAFVVFLLVTLAILTALRLCAYCCNIVNVSLVKPSFYVYS
RVKNLNSSRVPDLLV
>QNO62665.1 |envelope protein [Severe acute respiratory syndrome coronavirus 2]
MYSFVSEETGTLIVNSVLLFLAFVVFLLVTLAILTALRLCAYCCNIVNVSLVKPSFYVYS
RVKNLNSSRVPDLLV
>QNO62677.1 |envelope protein [Severe acute respiratory syndrome coronavirus 2]
MYSFVSEETGTLIVNSVLLFLAFVVFLLVTLAILTALRLCAYCCNIVNVSLVKPSFYVYS
RVKNLNSSRVPDLLV
>QNO62689.1 |envelope protein [Severe acute respiratory syndrome coronavirus 2]
MYSFVSEETGTLIVNSVLLFLAFVVFLLVTLAILTALRLCAYCCNIVNVSLVKPSFYVYS
RVKNLNSSRVPDLLV
>QNO62701.1 |envelope protein [Severe acute respiratory syndrome coronavirus 2]
MYSFVSEETGTLIVNSVLLFLAFVVFLLVTLAILTALRLCAYCCNIVNVSLVKPSFYVYS
RVKNLNSSRVPDLLV
>QNO62713.1 |envelope protein [Severe acute respiratory syndrome coronavirus 2]
MYSFVSEETGTLIVNSVLLFLAFVVFLLVTLAILTALRLCAYCCNIVNVSLVKPSFYVYS
RVKNLNSSRVPDLLV
>QNO62725.1 |envelope protein [Severe acute respiratory syndrome coronavirus 2]
MYSFVSEETGTLIVNSVLLFLAFVVFLLVTLAILTALRLCAYCCNIVNVSLVKPSFYVYS
RVKNLNSSRVPDLLV
>QNO62737.1 |envelope protein [Severe acute respiratory syndrome coronavirus 2]
MYSFVSEETGTLIVNSVLLFLAFVVFLLVTLAILTALRLCAYCCNIVNVSLVKPSFYVYS
RVKNLNSSRVPDLLV
>QNO62749.1 |envelope protein [Severe acute respiratory syndrome coronavirus 2]
MYSFVSEETGTLIVNSVLLFLAFVVFLLVTLAILTALRLCAYCCNIVNVSLVKPSFYVYS
RVKNLNSSRVPDLLV
>QNO62761.1 |envelope protein [Severe acute respiratory syndrome coronavirus 2]
MYSFVSEETGTLIVNSVLLFLAFVVFLLVTLAILTALRLCAYCCNIVNVSLVKPSFYVYS
RVKNLNSSRVPDLLV
>QNO62773.1 |envelope protein [Severe acute respiratory syndrome coronavirus 2]
MYSFVSEETGTLIVNSVLLFLAFVVFLLVTLAILTALRLCAYCCNIVNVSLVKPSFYVYS
RVKNLNSSRVPDLLV
>QNO62785.1 |envelope protein [Severe acute respiratory syndrome coronavirus 2]
MYSFVSEETGTLIVNSVLLFLAFVVFLLVTLAILTALRLCAYCCNIVNVSLVKPSFYVYS
RVKNLNSSRVPDLLV
>QNO62797.1 |envelope protein [Severe acute respiratory syndrome coronavirus 2]
MYSFVSEETGTLIVNSVLLFLAFVVFLLVTLAILTALRLCAYCCNIVNVSLVKPSFYVYS
RVKNLNSSRVPDLLV
>QNO62809.1 |envelope protein [Severe acute respiratory syndrome coronavirus 2]
MYSFVSEETGTLIVNSVLLFLAFVVFLLVTLAILTALRLCAYCCNIVNVSLVKPSFYVYS
RVKNLNSSRVPDLLV
>QNO62821.1 |envelope protein [Severe acute respiratory syndrome coronavirus 2]
MYSFVSEETGTLIVNSVLLFLAFVVFLLVTLAILTALRLCAYCCNIVNVSLVKPSFYVYS
RVKNLNSSRVPDLLV
>QNO62833.1 |envelope protein [Severe acute respiratory syndrome coronavirus 2]
MYSFVSEETGTLIVNSVLLFLAFVVFLLVTLAILTALRLCAYCCNIVNVSLVKPSFYVYS
RVKNLNSSRVPDLLV
>QNO62845.1 |envelope protein [Severe acute respiratory syndrome coronavirus 2]
MYSFVSEETGTLIVNSVLLFLAFVVFLLVTLAILTALRLCAYCCNIVNVSLVKPSFYVYS
RVKNLNSSRVPDLLV
>QNO62857.1 |envelope protein [Severe acute respiratory syndrome coronavirus 2]
MYSFVSEETGTLIVNSVLLFLAFVVFLLVTLAILTALRLCAYCCNIVNVSLVKPSFYVYS
RVKNLNSSRVPDLLV
>QNO62869.1 |envelope protein [Severe acute respiratory syndrome coronavirus 2]
MYSFVSEETGTLIVNSVLLFLAFVVFLLVTLAILTALRLCAYCCNIVNVSLVKPSFYVYS
RVKNLNSSRVPDLLV
>QNO62881.1 |envelope protein [Severe acute respiratory syndrome coronavirus 2]
MYSFVSEETGTLIVNSVLLFLAFVVFLLVTLAILTALRLCAYCCNIVNVSLVKPSFYVYS
RVKNLNSSRVPDLLV
>QNO62893.1 |envelope protein [Severe acute respiratory syndrome coronavirus 2]
MYSFVSEETGTLIVNSVLLFLAFVVFLLVTLAILTALRLCAYCCNIVNVSLVKPSFYVYS
RVKNLNSSRVPDLLV
>QNO62905.1 |envelope protein [Severe acute respiratory syndrome coronavirus 2]
MYSFVSEETGTLIVNSVLLFLAFVVFLLVTLAILTALRLCAYCCNIVNVSLVKPSFYVYS
RVKNLNSSRVPDLLV
>QNO62917.1 |envelope protein [Severe acute respiratory syndrome coronavirus 2]
MYSFVSEETGTLIVNSVLLFLAFVVFLLVTLAILTALRLCAYCCNIVNVSLVKPSFYVYS
RVKNLNSSRVPDLLV
>QNO62929.1 |envelope protein [Severe acute respiratory syndrome coronavirus 2]
MYSFVSEETGTLIVNSVLLFLAFVVFLLVTLAILTALRLCAYCCNIVNVSLVKPSFYVYS
RVKNLNSSRVPDLLV
>QNO62941.1 |envelope protein [Severe acute respiratory syndrome coronavirus 2]
MYSFVSEETGTLIVNSVLLFLAFVVFLLVTLAILTALRLCAYCCNIVNVSLVKPSFYVYS
RVKNLNSSRVPDLLV
>QNO62953.1 |envelope protein [Severe acute respiratory syndrome coronavirus 2]
MYSFVSEETGTLIVNSVLLFLAFVVFLLVTLAILTALRLCAYCCNIVNVSLVKPSFYVYS
RVKNLNSSRVPDLLV
>QNO62965.1 |envelope protein [Severe acute respiratory syndrome coronavirus 2]
MYSFVSEETGTLIVNSVLLFLAFVVFLLVTLAILTALRLCAYCCNIVNVSLVKPSFYVYS
RVKNLNSSRVPDLLV
>QNO62977.1 |envelope protein [Severe acute respiratory syndrome coronavirus 2]
MYSFVSEETGTLIVNSVLLFLAFVVFLLVTLAILTALRLCAYCCNIVNVSLVKPSFYVYS
RVKNLNSSRVPDLLV
>QNO62989.1 |envelope protein [Severe acute respiratory syndrome coronavirus 2]
MYSFVSEETGTLIVNSVLLFLAFVVFLLVTLAILTALRLCAYCCNIVNVSLVKPSFYVYS
RVKNLNSSRVPDLLV
>QNO63001.1 |envelope protein [Severe acute respiratory syndrome coronavirus 2]
MYSFVSEETGTLIVNSVLLFLAFVVFLLVTLAILTALRLCAYCCNIVNVSLVKPSFYVYS
RVKNLNSSRVPDLLV
>QNO63013.1 |envelope protein [Severe acute respiratory syndrome coronavirus 2]
MYSFVSEETGTLIVNSVLLFLAFVVFLLVTLAILTALRLCAYCCNIVNVSLVKPSFYVYS
RVKNLNSSRVPDLLV
>QNO63025.1 |envelope protein [Severe acute respiratory syndrome coronavirus 2]
MYSFVSEETGTLIVNSVLLFLAFVVFLLVTLAILTALRLCAYCCNIVNVSLVKPSFYVYS
RVKNLNSSRVPDLLV
>QNO63037.1 |envelope protein [Severe acute respiratory syndrome coronavirus 2]
MYSFVSEETGTLIVNSVLLFLAFVVFLLVTLAILTALRLCAYCCNIVNVSLVKPSFYVYS
RVKNLNSSRVPDLLV
>QNO63049.1 |envelope protein [Severe acute respiratory syndrome coronavirus 2]
MYSFVSEETGTLIVNSVLLFLAFVVFLLVTLAILTALRLCAYCCNIVNVSLVKPSFYVYS
RVKNLNSSRVPDLLV
>QNO63061.1 |envelope protein [Severe acute respiratory syndrome coronavirus 2]
MYSFVSEETGTLIVNSVLLFLAFVVFLLVTLAILTALRLCAYCCNIVNVSLVKPSFYVYS
RVKNLNSSRVPDLLV
>QNO63073.1 |envelope protein [Severe acute respiratory syndrome coronavirus 2]
MYSFVSEETGTLIVNSVLLFLAFVVFLLVTLAILTALRLCAYCCNIVNVSLVKPSFYVYS
RVKNLNSSRVPDLLV
>QNO63085.1 |envelope protein [Severe acute respiratory syndrome coronavirus 2]
MYSFVSEETGTLIVNSVLLFLAFVVFLLVTLAILTALRLCAYCCNIVNVSLVKPSFYVYS
RVKNLNSSRVPDLLV
>QNO63097.1 |envelope protein [Severe acute respiratory syndrome coronavirus 2]
MYSFVSEETGTLIVNSVLLFLAFVVFLLVTLAILTALRLCAYCCNIVNVSLVKPSFYVYS
RVKNLNSSRVPDLLV
>QNO63109.1 |envelope protein [Severe acute respiratory syndrome coronavirus 2]
MYSFVSEETGTLIVNSVLLFLAFVVFLLVTLAILTALRLCAYCCNIVNVSLVKPSFYVYS
RVKNLNSSRVPDLLV
>QNO63121.1 |envelope protein [Severe acute respiratory syndrome coronavirus 2]
MYSFVSEETGTLIVNSVLLFLAFVVFLLVTLAILTALRLCAYCCNIVNVSLVKPSFYVYS
RVKNLNSSRVPDLLV
>QNO63133.1 |envelope protein [Severe acute respiratory syndrome coronavirus 2]
MYSFVSEETGTLIVNSVLLFLAFVVFLLVTLAILTALRLCAYCCNIVNVSLVKPSFYVYS
RVKNLNSSRVPDLLV
>QNO63145.1 |envelope protein [Severe acute respiratory syndrome coronavirus 2]
MYSFVSEETGTLIVNSVLLFLAFVVFLLVTLAILTALRLCAYCCNIVNVSLVKPSFYVYS
RVKNLNSSRVPDLLV
>QNO63157.1 |envelope protein [Severe acute respiratory syndrome coronavirus 2]
MYSFVSEETGTLIVNSVLLFLAFVVFLLVTLAILTALRLCAYCCNIVNVSLVKPSFYVYS
RVKNLNSSRVPDLLV
>QNO63169.1 |envelope protein [Severe acute respiratory syndrome coronavirus 2]
MYSFVSEETGTLIVNSVLLFLAFVVFLLVTLAILTALRLCAYCCNIVNVSLVKPSFYVYS
RVKNLNSSRVPDLLV
>QNO63181.1 |envelope protein [Severe acute respiratory syndrome coronavirus 2]
MYSFVSEETGTLIVNSVLLFLAFVVFLLVTLAILTALRLCAYCCNIVNVSLVKPSFYVYS
RVKNLNSSRVPDLLV
>QNO63193.1 |envelope protein [Severe acute respiratory syndrome coronavirus 2]
MYSFVSEETGTLIVNSVLLFLAFVVFLLVTLAILTALRLCAYCCNIVNVSLVKPSFYVYS
RVKNLNSSRVPDLLV
>QNO63205.1 |envelope protein [Severe acute respiratory syndrome coronavirus 2]
MYSFVSEETGTLIVNSVLLFLAFVVFLLVTLAILTALRLCAYCCNIVNVSLVKPSFYVYS
RVKNLNSSRVPDLLV
>QNO63217.1 |envelope protein [Severe acute respiratory syndrome coronavirus 2]
MYSFVSEETGTLIVNSVLLFLAFVVFLLVTLAILTALRLCAYCCNIVNVSLVKPSFYVYS
RVKNLNSSRVPDLLV
>QNO63229.1 |envelope protein [Severe acute respiratory syndrome coronavirus 2]
MYSFVSEETGTLIVNSVLLFLAFVVFLLVTLAILTALRLCAYCCNIVNVSLVKPSFYVYS
RVKNLNSSRVPDLLV
>QNO63241.1 |envelope protein [Severe acute respiratory syndrome coronavirus 2]
MYSFVSEETGTLIVNSVLLFLAFVVFLLVTLAILTALRLCAYCCNIVNVSLVKPSFYVYS
RVKNLNSSRVPDLLV
>QNO63253.1 |envelope protein [Severe acute respiratory syndrome coronavirus 2]
MYSFVSEETGTLIVNSVLLFLAFVVFLLVTLAILTALRLCAYCCNIVNVSLVKPSFYVYS
RVKNLNSSRVPDLLV
>QNO63265.1 |envelope protein [Severe acute respiratory syndrome coronavirus 2]
MYSFVSEETGTLIVNSVLLFLAFVVFLLVTLAILTALRLCAYCCNIVNVSLVKPSFYVYS
RVKNLNSSRVPDLLV
>QNO63277.1 |envelope protein [Severe acute respiratory syndrome coronavirus 2]
MYSFVSEETGTLIVNSVLLFLAFVVFLLVTLAILTALRLCAYCCNIVNVSLVKPSFYVYS
RVKNLNSSRVPDLLV
>QNO63289.1 |envelope protein [Severe acute respiratory syndrome coronavirus 2]
MYSFVSEETGTLIVNSVLLFLAFVVFLLVTLAILTALRLCAYCCNIVNVSLVKPSFYVYS
RVKNLNSSRVPDLLV
>QNO63301.1 |envelope protein [Severe acute respiratory syndrome coronavirus 2]
MYSFVSEETGTLIVNSVLLFLAFVVFLLVTLAILTALRLCAYCCNIVNVSLVKPSFYVYS
RVKNLNSSRVPDLLV
>QNO63313.1 |envelope protein [Severe acute respiratory syndrome coronavirus 2]
MYSFVSEETGTLIVNSVLLFLAFVVFLLVTLAILTALRLCAYCCNIVNVSLVKPSFYVYS
RVKNLNSSRVPDLLV
>QNO63325.1 |envelope protein [Severe acute respiratory syndrome coronavirus 2]
MYSFVSEETGTLIVNSVLLFLAFVVFLLVTLAILTALRLCAYCCNIVNVSLVKPSFYVYS
RVKNLNSSRVPDLLV
>QNO63337.1 |envelope protein [Severe acute respiratory syndrome coronavirus 2]
MYSFVSEETGTLIVNSVLLFLAFVVFLLVTLAILTALRLCAYCCNIVNVSLVKPSFYVYS
RVKNLNSSRVPDLLV
>QNO63349.1 |envelope protein [Severe acute respiratory syndrome coronavirus 2]
MYSFVSEETGTLIVNSVLLFLAFVVFLLVTLAILTALRLCAYCCNIVNVSLVKPSFYVYS
RVKNLNSSRVPDLLV
>QNO63361.1 |envelope protein [Severe acute respiratory syndrome coronavirus 2]
MYSFVSEETGTLIVNSVLLFLAFVVFLLVTLAILTALRLCAYCCNIVNVSLVKPSFYVYS
RVKNLNSSRVPDLLV
>QNO63373.1 |envelope protein [Severe acute respiratory syndrome coronavirus 2]
MYSFVSEETGTLIVNSVLLFLAFVVFLLVTLAILTALRLCAYCCNIVNVSLVKPSFYVYS
RVKNLNSSRVPDLLV
>QNO63385.1 |envelope protein [Severe acute respiratory syndrome coronavirus 2]
MYSFVSEETGTLIVNSVLLFLAFVVFLLVTLAILTALRLCAYCCNIVNVSLVKPSFYVYS
RVKNLNSSRVPDLLV
>QNO63397.1 |envelope protein [Severe acute respiratory syndrome coronavirus 2]
MYSFVSEETGTLIVNSVLLFLAFVVFLLVTLAILTALRLCAYCCNIVNVSLVKPSFYVYS
RVKNLNSSRVPDLLV
>QNO63409.1 |envelope protein [Severe acute respiratory syndrome coronavirus 2]
MYSFVSEETGTLIVNSVLLFLAFVVFLLVTLAILTALRLCAYCCNIVNVSLVKPSFYVYS
RVKNLNSSRVPDLLV
>QNO63421.1 |envelope protein [Severe acute respiratory syndrome coronavirus 2]
MYSFVSEETGTLIVNSVLLFLAFVVFLLVTLAILTALRLCAYCCNIVNVSLVKPSFYVYS
RVKNLNSSRVPDLLV
>QNO63433.1 |envelope protein [Severe acute respiratory syndrome coronavirus 2]
MYSFVSEETGTLIVNSVLLFFAFVVFLLVTLAILTALRLCAYCCNIVNVSLVKPSFYVYS
RVKNLNSSRVPDLLV
>QNO63445.1 |envelope protein [Severe acute respiratory syndrome coronavirus 2]
MYSFVSEETGTLIVNSVLLFLAFVVFLLVTLAILTALRLCAYCCNIVNVSLVKPSFYVYS
RVKNLNSSRVPDLLV
>QNO63457.1 |envelope protein [Severe acute respiratory syndrome coronavirus 2]
MYSFVSEETGTLIVNSVLLFLAFVVFLLVTLAILTALRLCAYCCNIVNVSLVKPSFYVYS
RVKNLNSSRVPDLLV
>QNO63469.1 |envelope protein [Severe acute respiratory syndrome coronavirus 2]
MYSFVSEETGTLIVNSVLLFLAFVVFLLVTLAILTALRLCAYCCNIVNVSLVKPSFYVYS
RVKNLNSSRVPDLLV
>QNO63481.1 |envelope protein [Severe acute respiratory syndrome coronavirus 2]
MYSFVSEETGTLIVNSVLLFLAFVVFLLVTLAILTALRLCAYCCNIVNVSLVKPSFYVYS
RVKNLNSSRVPDLLV
>QNO63493.1 |envelope protein [Severe acute respiratory syndrome coronavirus 2]
MYSFVSEETGTLIVNSVLLFLAFVVFLLVTLAILTALRLCAYCCNIVNVSLVKPSFYVYS
RVKNLNSSRVPDLLV
>QNO63505.1 |envelope protein [Severe acute respiratory syndrome coronavirus 2]
MYSFVSEETGTLIVNSVLLFLAFVVFLLVTLAILTALRLCAYCCNIVNVSLVKPSFYVYS
RVKNLNSSRVPDLLV
>QNO63517.1 |envelope protein [Severe acute respiratory syndrome coronavirus 2]
MYSFVSEETGTLIVNSVLLFLAFVVFLLVTLAILTALRLCAYCCNIVNVSLVKPSFYVYS
RVKNLNSSRVPDLLV
>QNO63529.1 |envelope protein [Severe acute respiratory syndrome coronavirus 2]
MYSFVSEETGTLIVNSVLLFLAFVVFLLVTLAILTALRLCAYCCNIVNVSLVKPSFYVYS
RVKNLNSSRVPDLLV
>QNO63541.1 |envelope protein [Severe acute respiratory syndrome coronavirus 2]
MYSFVSEETGTLIVNSVLLFLAFVVFLLVTLAILTALRLCAYCCNIVNVSLVKPSFYVYS
RVKNLNSSRVPDLLV
>QNO63553.1 |envelope protein [Severe acute respiratory syndrome coronavirus 2]
MYSFVSEETGTLIVNSVLLFLAFVVFLLVTLAILTALRLCAYCCNIVNVSLVKPSFYVYS
RVKNLNSSRVPDLLV
>QNO63565.1 |envelope protein [Severe acute respiratory syndrome coronavirus 2]
MYSFVSEETGTLIVNSVLLFLAFVVFLLVTLAILTALRLCAYCCNIVNVSLVKPSFYVYS
RVKNLNSSRVPDLLV
>QNO63577.1 |envelope protein [Severe acute respiratory syndrome coronavirus 2]
MYSFVSEETGTLIVNSVLLFLAFVVFLLVTLAILTALRLCAYCCNIVNVSLVKPSFYVYS
RVKNLNSSRVPDLLV
>QNO63589.1 |envelope protein [Severe acute respiratory syndrome coronavirus 2]
MYSFVSEETGTLIVNSVLLFLAFVVFLLVTLAILTALRLCAYCCNIVNVSLVKPSFYVYS
RVKNLNSSRVPDLLV
>QNO63601.1 |envelope protein [Severe acute respiratory syndrome coronavirus 2]
MYSFVSEETGTLIVNSVLLFLAFVVFLLVTLAILTALRLCAYCCNIVNVSLVKPSFYVYS
RVKNLNSSRVPDLLV
>QNO63613.1 |envelope protein [Severe acute respiratory syndrome coronavirus 2]
MYSFVSEETGTLIVNSVLLFLAFVVFLLVTLAILTALRLCAYCCNIVNVSLVKPSFYVYS
RVKNLNSSRVPDLLV
>QNO63625.1 |envelope protein [Severe acute respiratory syndrome coronavirus 2]
MYSFVSEETGTLIVNSVLLFLAFVVFLLVTLAILTALRLCAYCCNIVNVSLVKPSFYVYS
RVKNLNSSRVPDLLV
>QNO63637.1 |envelope protein [Severe acute respiratory syndrome coronavirus 2]
MYSFVSEETGTLIVNSVLLFLAFVVFLLVTLAILTALRLCAYCCNIVNVSLVKPSFYVYS
RVKNLNSSRVPDLLV
>QNO63649.1 |envelope protein [Severe acute respiratory syndrome coronavirus 2]
MYSFVSEETGTLIVNSVLLFLAFVVFLLVTLAILTALRLCAYCCNIVNVSLVKPSFYVYS
RVKNLNSSRVPDLLV
>QNO63661.1 |envelope protein [Severe acute respiratory syndrome coronavirus 2]
MYSFVSEETGTLIVNSVLLFLAFVVFLLVTLAILTALRLCAYCCNIVNVSLVKPSFYVYS
RVKNLNSSRVPDLLV
>QNO63673.1 |envelope protein [Severe acute respiratory syndrome coronavirus 2]
MYSFVSEETGTLIVNSVLLFLAFVVFLLVTLAILTALRLCAYCCNIVNVSLVKPSFYVYS
RVKNLNSSRVPDLLV
>QNO63685.1 |envelope protein [Severe acute respiratory syndrome coronavirus 2]
MYSFVSEETGTLIVNSVLLFLAFVVFLLVTLAILTALRLCAYCCNIVNVSLVKPSFYVYS
RVKNLNSSRVPDLLV
>QNO63697.1 |envelope protein [Severe acute respiratory syndrome coronavirus 2]
MYSFVSEETGTLIVNSVLLFLAFVVFLLVTLAILTALRLCAYCCNIVNVSLVKPSFYVYS
RVKNLNSSRVPDLLV
>QNO63709.1 |envelope protein [Severe acute respiratory syndrome coronavirus 2]
MYSFVSEETGTLIVNSVLLFLAFVVFLLVTLAILTALRLCAYCCNIVNVSLVKPSFYVYS
RVKNLNSSRVPDLLV
>QNO63721.1 |envelope protein [Severe acute respiratory syndrome coronavirus 2]
MYSFVSEETGTLIVNSVLLFLAFVVFLLVTLAILTALRLCAYCCNIVNVSLVKPSFYVYS
RVKNLNSSRVPDLLV
>QNO63733.1 |envelope protein [Severe acute respiratory syndrome coronavirus 2]
MYSFVSEETGTLIVNSVLLFLAFVVFLLVTLAILTALRLCAYCCNIVNVSLVKPSFYVYS
RVKNLNSSRVPDLLV
>QNO63745.1 |envelope protein [Severe acute respiratory syndrome coronavirus 2]
MYSFVSEETGTLIVNSVLLFLAFVVFLLVTLAILTALRLCAYCCNIVNVSLVKPSFYVYS
RVKNLNSSRVPDLLV
>QNO63757.1 |envelope protein [Severe acute respiratory syndrome coronavirus 2]
MYSFVSEETGTLIVNSVLLFLAFVVFLLVTLAILTALRLCAYCCNIVNVSLVKPSFYVYS
RVKNLNSSRVPDLLV
>QNO63769.1 |envelope protein [Severe acute respiratory syndrome coronavirus 2]
MYSFVSEETGTLIVNSVLLFLAFVVFLLVTLAILTALRLCAYCCNIVNVSLVKPSFYVYS
RVKNLNSSRVPDLLV
>QNO63781.1 |envelope protein [Severe acute respiratory syndrome coronavirus 2]
MYSFVSEETGTLIVNSVLLFLAFVVFLLVTLAILTALRLCAYCCNIVNVSLVKPSFYVYS
RVKNLNSSRVPDLLV
>QNO63793.1 |envelope protein [Severe acute respiratory syndrome coronavirus 2]
MYSFVSEETGTLIVNSVLLFLAFVVFLLVTLAILTALRLCAYCCNIVNVSLVKPSFYVYS
RVKNLNSSRVPDLLV
>QNO63805.1 |envelope protein [Severe acute respiratory syndrome coronavirus 2]
MYSFVSEETGTLIVNSVLLFLAFVVFLLVTLAILTALRLCAYCCNIVNVSLVKPSFYVYS
RVKNLNSSRVPDLLV
>QNO63817.1 |envelope protein [Severe acute respiratory syndrome coronavirus 2]
MYSFVSEETGTLIVNSVLLFLAFVVFLLVTLAILTALRLCAYCCNIVNVSLVKPSFYVYS
RVKNLNSSRVPDLLV
>QNO63829.1 |envelope protein [Severe acute respiratory syndrome coronavirus 2]
MYSFVSEETGTLIVNSVLLFLAFVVFLLVTLAILTALRLCAYCCNIVNVSLVKPSFYVYS
RVKNLNSSRVPDLLV
>QNO63841.1 |envelope protein [Severe acute respiratory syndrome coronavirus 2]
MYSFVSEETGTLIVNSVLLFLAFVVFLLVTLAILTALRLCAYCCNIVNVSLVKPSFYVYS
RVKNLNSSRVPDLLV
>QNO63853.1 |envelope protein [Severe acute respiratory syndrome coronavirus 2]
MYSFVSEETGTLIVNSVLLFLAFVVFLLVTLAILTALRLCAYCCNIVNVSLVKPSFYVYS
RVKNLNSSRVPDLLV
>QNO63865.1 |envelope protein [Severe acute respiratory syndrome coronavirus 2]
MYSFVSEETGTLIVNSVLLFLAFVVFLLVTLAILTALRLCAYCCNIVNVSLVKPSFYVYS
RVKNLNSSRVPDLLV
>QNO63877.1 |envelope protein [Severe acute respiratory syndrome coronavirus 2]
MYSFVSEETGTLIVNSVLLFLAFVVFLLVTLAILTALRLCAYCCNIVNVSLVKPSFYVYS
RVKNLNSSRVPDLLV
>QNO63889.1 |envelope protein [Severe acute respiratory syndrome coronavirus 2]
MYSFVSEETGTLIVNSVLLFLAFVVFLLVTLAILTALRLCAYCCNIVNVSLVKPSFYVYS
RVKNLNSSRVPDLLV
>QNO63901.1 |envelope protein [Severe acute respiratory syndrome coronavirus 2]
MYSFVSEETGTLIVNSVLLFLAFVVFLLVTLAILTALRLCAYCCNIVNVSLVKPSFYVYS
RVKNLNSSRVPDLLV
>QNO63913.1 |envelope protein [Severe acute respiratory syndrome coronavirus 2]
MYSFVSEETGTLIVNSVLLFLAFVVFLLVTLAILTALRLCAYCCNIVNVSLVKPSFYVYS
RVKNLNSSRVPDLLV
>QNO63925.1 |envelope protein [Severe acute respiratory syndrome coronavirus 2]
MYSFVSEETGTLIVNSVLLFLAFVVFLLVTLAILTALRLCAYCCNIVNVSLVKPSFYVYS
RVKNLNSSRVPDLLV
>QNO63937.1 |envelope protein [Severe acute respiratory syndrome coronavirus 2]
MYSFVSEETGTLIVNSVLLFLAFVVFLLVTLAILTALRLCAYCCNIVNVSLVKPSFYVYS
RVKNLNSSRVPDLLV
>QNO63949.1 |envelope protein [Severe acute respiratory syndrome coronavirus 2]
MYSFVSEETGTLIVNSVLLFLAFVVFLLVTLAILTALRLCAYCCNIVNVSLVKPSFYVYS
RVKNLNSSRVPDLLV
>QNO63961.1 |envelope protein [Severe acute respiratory syndrome coronavirus 2]
MYSFVSEETGTLIVNSVLLFLAFVVFLLVTLAILTALRLCAYCCNIVNVSLVKPSFYVYS
RVKNLNSSRVPDLLV
>QNO63973.1 |envelope protein [Severe acute respiratory syndrome coronavirus 2]
MYSFVSEETGTLIVNSVLLFLAFVVFLLVTLAILTALRLCAYCCNIVNVSLVKPSFYVYS
RVKNLNSSRVPDLLV
>QNO63985.1 |envelope protein [Severe acute respiratory syndrome coronavirus 2]
MYSFVSEETGTLIVNSVLLFLAFVVFLLVTLAILTALRLCAYCCNIVNVSLVKPSFYVYS
RVKNLNSSRVPDLLV
>QNO63997.1 |envelope protein [Severe acute respiratory syndrome coronavirus 2]
MYSFVSEETGTLIVNSVLLFLAFVVFLLVTLAILTALRLCAYCCNIVNVSLVKPSFYVYS
RVKNLNSSRVPDLLV
>QNO64009.1 |envelope protein [Severe acute respiratory syndrome coronavirus 2]
MYSFVSEETGTLIVNSVLLFLAFVVFLLVTLAILTALRLCAYCCNIVNVSLVKPSFYVYS
RVKNLNSSRVPDLLV
>QNO64021.1 |envelope protein [Severe acute respiratory syndrome coronavirus 2]
MYSFVSEETGTLIVNSVLLFLAFVVFLLVTLAILTALRLCAYCCNIVNVSLVKPSFYVYS
RVKNLNSSRVPDLLV
>QNO64033.1 |envelope protein [Severe acute respiratory syndrome coronavirus 2]
MYSFVSEETGTLIVNSVLLFLAFVVFLLVTLAILTALRLCAYCCNIVNVSLVKPSFYVYS
RVKNLNSSRVPDLLV
>QNO64045.1 |envelope protein [Severe acute respiratory syndrome coronavirus 2]
MYSFVSEETGTLIVNSVLLFLAFVVFLLVTLAILTALRLCAYCCNIVNVSLVKPSFYVYS
RVKNLNSSRVPDLLV
>QNO64057.1 |envelope protein [Severe acute respiratory syndrome coronavirus 2]
MYSFVSEETGTLIVNSVLLFLAFVVFLLVTLAILTALRLCAYCCNIVNVSLVKPSFYVYS
RVKNLNSSRVPDLLV
>QNO64069.1 |envelope protein [Severe acute respiratory syndrome coronavirus 2]
MYSFVSEETGTLIVNSVLLFLAFVVFLLVTLAILTALRLCAYCCNIVNVSLVKPSFYVYS
RVKNLNSSRVPDLLV
>QNO64081.1 |envelope protein [Severe acute respiratory syndrome coronavirus 2]
MYSFVSEETGTLIVNSVLLFLAFVVFLLVTLAILTALRLCAYCCNIVNVSLVKPSFYVYS
RVKNLNSSRVPDLLV
>QNO64093.1 |envelope protein [Severe acute respiratory syndrome coronavirus 2]
MYSFVSEETGTLIVNSVLLFLAFVVFLLVTLAILTALRLCAYCCNIVNVSLVKPSFYVYS
RVKNLNSSRVPDLLV
>QNO64105.1 |envelope protein [Severe acute respiratory syndrome coronavirus 2]
MYSFVSEETGTLIVNSVLLFLAFVVFLLVTLAILTALRLCAYCCNIVNVSLVKPSFYVYS
RVKNLNSSRVPDLLV
>QNO64117.1 |envelope protein [Severe acute respiratory syndrome coronavirus 2]
MYSFVSEETGTLIVNSVLLFLAFVVFLLVTLAILTALRLCAYCCNIVNVSLVKPSFYVYS
RVKNLNSSRVPDLLV
>QNO64129.1 |envelope protein [Severe acute respiratory syndrome coronavirus 2]
MYSFVSEETGTLIVNSVLLFLAFVVFLLVTLAILTALRLCAYCCNIVNVSLVKPSFYVYS
RVKNLNSSRVPDLLV
>QNO64141.1 |envelope protein [Severe acute respiratory syndrome coronavirus 2]
MYSFVSEETGTLIVNSVLLFLAFVVFLLVTLAILTALRLCAYCCNIVNVSLVKPSFYVYS
RVKNLNSSRVPDLLV
>QNO64153.1 |envelope protein [Severe acute respiratory syndrome coronavirus 2]
MYSFVSEETGTLIVNSVLLFLAFVVFLLVTLAILTALRLCAYCCNIVNVSLVKPSFYVYS
RVKNLNSSRVPDLLV
>QNO64165.1 |envelope protein [Severe acute respiratory syndrome coronavirus 2]
MYSFVSEETGTLIVNSVLLFLAFVVFLLVTLAILTALRLCAYCCNIVNVSLVKPSFYVYS
RVKNLNSSRVPDLLV
>QNO64177.1 |envelope protein [Severe acute respiratory syndrome coronavirus 2]
MYSFVSEETGTLIVNSVLLFLAFVVFLLVTLAILTALRLCAYCCNIVNVSLVKPSFYVYS
RVKNLNSSRVPDLLV
>QNO64189.1 |envelope protein [Severe acute respiratory syndrome coronavirus 2]
MYSFVSEETGTLIVNSVLLFLAFVVFLLVTLAILTALRLCAYCCNIVNVSLVKPSFYVYS
RVKNLNSSRVPDLLV
>QNO64201.1 |envelope protein [Severe acute respiratory syndrome coronavirus 2]
MYSFVSEETGTLIVNSVLLFLAFVVFLLVTLAILTALRLCAYCCNIVNVSLVKPSFYVYS
RVKNLNSSRVPDLLV
>QNO64213.1 |envelope protein [Severe acute respiratory syndrome coronavirus 2]
MYSFVSEETGTLIVNSVLLFLAFVVFLLVTLAILTALRLCAYCCNIVNVSLVKPSFYVYS
RVKNLNSSRVPDLLV
>QNO64225.1 |envelope protein [Severe acute respiratory syndrome coronavirus 2]
MYSFVSEETGTLIVNSVLLFLAFVVFLLVTLAILTALRLCAYCCNIVNVSLVKPSFYVYS
RVKNLNSSRVPDLLV
>QNO64237.1 |envelope protein [Severe acute respiratory syndrome coronavirus 2]
MYSFVSEETGTLIVNSVLLFLAFVVFLLVTLAILTALRLCAYCCNIVNVSLVKPSFYVYS
RVKNLNSSRVPDLLV
>QNO64249.1 |envelope protein [Severe acute respiratory syndrome coronavirus 2]
MYSFVSEETGTLIVNSVLLFLAFVVFLLVTLAILTALRLCAYCCNIVNVSLVKPSFYVYS
RVKNLNSSRVPDLLV
>QNO64261.1 |envelope protein [Severe acute respiratory syndrome coronavirus 2]
MYSFVSEETGTLIVNSVLLFLAFVVFLLVTLAILTALRLCAYCCNIVNVSLVKPSFYVYS
RVKNLNSSRVPDLLV
>QNO64273.1 |envelope protein [Severe acute respiratory syndrome coronavirus 2]
MYSFVSEETGTLIVNSVLLFLAFVVFLLVTLAILTALRLCAYCCNIVNVSLVKPSFYVYS
RVKNLNSSRVPDLLV
>QNO64285.1 |envelope protein [Severe acute respiratory syndrome coronavirus 2]
MYSFVSEETGTLIVNSVLLFLAFVVFLLVTLAILTALRLCAYCCNIVNVSLVKPSFYVYS
RVKNLNSSRVPDLLV
>QNO64297.1 |envelope protein [Severe acute respiratory syndrome coronavirus 2]
MYSFVSEETGTLIVNSVLLFLAFVVFLLVTLAILTALRLCAYCCNIVNVSLVKPSFYVYS
RVKNLNSSRVPDLLV
>QNO64309.1 |envelope protein [Severe acute respiratory syndrome coronavirus 2]
MYSFVSEETGTLIVNSVLLFLAFVVFLLVTLAILTALRLCAYCCNIVNVSLVKPSFYVYS
RVKNLNSSRVPDLLV
>QNO64321.1 |envelope protein [Severe acute respiratory syndrome coronavirus 2]
MYSFVSEETGTLIVNSVLLFLAFVVFLLVTLAILTALRLCAYCCNIVNVSLVKPSFYVYS
RVKNLNSSRVPDLLV
>QNO64333.1 |envelope protein [Severe acute respiratory syndrome coronavirus 2]
MYSFVSEETGTLIVNSVLLFLAFVVFLLVTLAILTALRLCAYCCNIVNVSLVKPSFYVYS
RVKNLNSSRVPDLLV
>QNO64345.1 |envelope protein [Severe acute respiratory syndrome coronavirus 2]
MYSFVSEETGTLIVNSVLLFLAFVVFLLVTLAILTALRLCAYCCNIVNVSLVKPSFYVYS
RVKNLNSSRVPDLLV
>QNO64357.1 |envelope protein [Severe acute respiratory syndrome coronavirus 2]
MYSFVSEETGTLIVNSVLLFLAFVVFLLVTLAILTALRLCAYCCNIVNVSLVKPSFYVYS
RVKNLNSSRVPDLLV
>QNO64369.1 |envelope protein [Severe acute respiratory syndrome coronavirus 2]
MYSFVSEETGTLIVNSVLLFLAFVVFLLVTLAILTALRLCAYCCNIVNVSLVKPSFYVYS
RVKNLNSSRVPDLLV
>QNO64381.1 |envelope protein [Severe acute respiratory syndrome coronavirus 2]
MYSFVSEETGTLIVNSVLLFLAFVVFLLVTLAILTALRLCAYCCNIVNVSLVKPSFYVYS
RVKNLNSSRVPDLLV
>QNO64393.1 |envelope protein [Severe acute respiratory syndrome coronavirus 2]
MYSFVSEETGTLIVNSVLLFLAFVVFLLVTLAILTALRLCAYCCNIVNVSLVKPSFYVYS
RVKNLNSSRVPDLLV
>QNO64405.1 |envelope protein [Severe acute respiratory syndrome coronavirus 2]
MYSFVSEETGTLIVNSVLLFLAFVVFLLVTLAILTALRLCAYCCNIVNVSLVKPSFYVYS
RVKNLNSSRVPDLLV
>QNO64417.1 |envelope protein [Severe acute respiratory syndrome coronavirus 2]
MYSFVSEETGTLIVNSVLLFLAFVVFLLVTLAILTALRLCAYCCNIVNVSLVKPSFYVYS
RVKNLNSSRVPDLLV
>QNO64429.1 |envelope protein [Severe acute respiratory syndrome coronavirus 2]
MYSFVSEETGTLIVNSVLLFLAFVVFLLVTLAILTALRLCAYCCNIVNVSLVKPSFYVYS
RVKNLNSSRVPDLLV
>QNO64441.1 |envelope protein [Severe acute respiratory syndrome coronavirus 2]
MYSFVSEETGTLIVNSVLLFLAFVVFLLVTLAILTALRLCAYCCNIVNVSLVKPSFYVYS
RVKNLNSSRVPDLLV
>QNO64453.1 |envelope protein [Severe acute respiratory syndrome coronavirus 2]
MYSFVSEETGTLIVNSVLLFLAFVVFLLVTLAILTALRLCAYCCNIVNVSLVKPSFYVYS
RVKNLNSSRVPDLLV
>QNO64465.1 |envelope protein [Severe acute respiratory syndrome coronavirus 2]
MYSFVSEETGTLIVNSVLLFLAFVVFLLVTLAILTALRLCAYCCNIVNVSLVKPSFYVYS
RVKNLNSSRVPDLLV
>QNO64477.1 |envelope protein [Severe acute respiratory syndrome coronavirus 2]
MYSFVSEETGTLIVNSVLLFLAFVVFLLVTLAILTALRLCAYCCNIVNVSLVKPSFYVYS
RVKNLNSSRVPDLLV
>QNO64489.1 |envelope protein [Severe acute respiratory syndrome coronavirus 2]
MYSFVSEETGTLIVNSVLLFLAFVVFLLVTLAILTALRLCAYCCNIVNVSLVKPSFYVYS
RVKNLNSSRVPDLLV
>QNO64501.1 |envelope protein [Severe acute respiratory syndrome coronavirus 2]
MYSFVSEETGTLIVNSVLLFLAFVVFLLVTLAILTALRLCAYCCNIVNVSLVKPSFYVYS
RVKNLNSSRVPDLLV
>QNO64513.1 |envelope protein [Severe acute respiratory syndrome coronavirus 2]
MYSFVSEETGTLIVNSVLLFLAFVVFLLVTLAILTALRLCAYCCNIVNVSLVKPSFYVYS
RVKNLNSSRVPDLLV
>QNO64525.1 |envelope protein [Severe acute respiratory syndrome coronavirus 2]
MYSFVSEETGTLIVNSVLLFLAFVVFLLVTLAILTALRLCAYCCNIVNVSLVKPSFYVYS
RVKNLNSSRVPDLLV
>QNO64537.1 |envelope protein [Severe acute respiratory syndrome coronavirus 2]
MYSFVSEETGTLIVNSVLLFLAFVVFLLVTLAILTALRLCAYCCNIVNVSLVKPSFYVYS
RVKNLNSSRVPDLLV
>QNO64549.1 |envelope protein [Severe acute respiratory syndrome coronavirus 2]
MYSFVSEETGTLIVNSVLLFLAFVVFLLVTLAILTALRLCAYCCNIVNVSLVKPSFYVYS
RVKNLNSSRVPDLLV
>QNO64561.1 |envelope protein [Severe acute respiratory syndrome coronavirus 2]
MYSFVSEETGTLIVNSVLLFLAFVVFLLVTLAILTALRLCAYCCNIVNVSLVKPSFYVYS
RVKNLNSSRVPDLLV
>QNO64573.1 |envelope protein [Severe acute respiratory syndrome coronavirus 2]
MYSFVSEETGTLIVNSVLLFLAFVVFLLVTLAILTALRLCAYCCNIVNVSLVKPSFYVYS
RVKNLNSSRVPDLLV
>QNO64585.1 |envelope protein [Severe acute respiratory syndrome coronavirus 2]
MYSFVSEETGTLIVNSVLLFLAFVVFLLVTLAILTALRLCAYCCNIVNVSLVKPSFYVYS
RVKNLNSSRVPDLLV
>QNO64597.1 |envelope protein [Severe acute respiratory syndrome coronavirus 2]
MYSFVSEETGTLIVNSVLLFLAFVVFLLVTLAILTALRLCAYCCNIVNVSLVKPSFYVYS
RVKNLNSSRVPDLLV
>QNO64609.1 |envelope protein [Severe acute respiratory syndrome coronavirus 2]
MYSFVSEETGTLIVNSVLLFLAFVVFLLVTLAILTALRLCAYCCNIVNVSLVKPSFYVYS
RVKNLNSSRVPDLLV
>QNO64621.1 |envelope protein [Severe acute respiratory syndrome coronavirus 2]
MYSFVSEETGTLIVNSVLLFLAFVVFLLVTLAILTALRLCAYCCNIVNVSLVKPSFYVYS
RVKNLNSSRVPDLLV
>QNO64633.1 |envelope protein [Severe acute respiratory syndrome coronavirus 2]
MYSFVSEETGTLIVNSVLLFLAFVVFLLVTLAILTALRLCAYCCNIVNVSLVKPSFYVYS
RVKNLNSSRVPDLLV
>QNO64645.1 |envelope protein [Severe acute respiratory syndrome coronavirus 2]
MYSFVSEETGTLIVNSVLLFLAFVVFLLVTLAILTALRLCAYCCNIVNVSLVKPSFYVYS
RVKNLNSSRVPDLLV
>QNO64657.1 |envelope protein [Severe acute respiratory syndrome coronavirus 2]
MYSFVSEETGTLIVNSVLLFLAFVVFLLVTLAILTALRLCAYCCNIVNVSLVKPSFYVYS
RVKNLNSSRVPDLLV
>QNO64669.1 |envelope protein [Severe acute respiratory syndrome coronavirus 2]
MYSFVSEETGTLIVNSVLLFLAFVVFLLVTLAILTALRLCAYCCNIVNVSLVKPSFYVYS
RVKNLNSSRVPDLLV
>QNO64681.1 |envelope protein [Severe acute respiratory syndrome coronavirus 2]
MYSFVSEETGTLIVNSVLLFLAFVVFLLVTLAILTALRLCAYCCNIVNVSLVKPSFYVYS
RVKNLNSSRVPDLLV
>QNO64693.1 |envelope protein [Severe acute respiratory syndrome coronavirus 2]
MYSFVSEETGTLIVNSVLLFLAFVVFLLVTLAILTALRLCAYCCNIVNVSLVKPSFYVYS
RVKNLNSSRVPDLLV
>QNO64705.1 |envelope protein [Severe acute respiratory syndrome coronavirus 2]
MYSFVSEETGTLIVNSVLLFLAFVVFLLVTLAILTALRLCAYCCNIVNVSLVKPSFYVYS
RVKNLNSSRVPDLLV
>QNO64717.1 |envelope protein [Severe acute respiratory syndrome coronavirus 2]
MYSFVSEETGTLIVNSVLLFLAFVVFLLVTLAILTALRLCAYCCNIVNVSLVKPSFYVYS
RVKNLNSSRVPDLLV
>QNO64729.1 |envelope protein [Severe acute respiratory syndrome coronavirus 2]
MYSFVSEETGTLIVNSVLLFLAFVVFLLVTLAILTALRLCAYCCNIVNVSLVKPSFYVYS
RVKNLNSSRVPDLLV
>QNO64741.1 |envelope protein [Severe acute respiratory syndrome coronavirus 2]
MYSFVSEETGTLIVNSVLLFLAFVVFLLVTLAILTALRLCAYCCNIVNVSLVKPSFYVYS
RVKNLNSSRVPDLLV
>QNO64753.1 |envelope protein [Severe acute respiratory syndrome coronavirus 2]
MYSFVSEETGTLIVNSVLLFLAFVVFLLVTLAILTALRLCAYCCNIVNVSLVKPSFYVYS
RVKNLNSSRVPDLLV
>QNO64765.1 |envelope protein [Severe acute respiratory syndrome coronavirus 2]
MYSFVSEETGTLIVNSVLLFLAFVVFLLVTLAILTALRLCAYCCNIVNVSLVKPSFYVYS
RVKNLNSSRVPDLLV
>QNO64777.1 |envelope protein [Severe acute respiratory syndrome coronavirus 2]
MYSFVSEETGTLIVNSVLLFLAFVVFLLVTLAILTALRLCAYCCNIVNVSLVKPSFYVYS
RVKNLNSSRVPDLLV
>QNO64789.1 |envelope protein [Severe acute respiratory syndrome coronavirus 2]
MYSFVSEETGTLIVNSVLLFLAFVVFLLVTLAILTALRLCAYCCNIVNVSLVKPSFYVYS
RVKNLNSSRVPDLLV
>QNO64801.1 |envelope protein [Severe acute respiratory syndrome coronavirus 2]
MYSFVSEETGTLIVNSVLLFLAFVVFLLVTLAILTALRLCAYCCNIVNVSLVKPSFYVYS
RVKNLNSSRVPDLLV
>QNO64813.1 |envelope protein [Severe acute respiratory syndrome coronavirus 2]
MYSFVSEETGTLIVNSVLLFLAFVVFLLVTLAILTALRLCAYCCNIVNVSLVKPSFYVYS
RVKNLNSSRVPDLLV
>QNO64825.1 |envelope protein [Severe acute respiratory syndrome coronavirus 2]
MYSFVSEETGTLIVNSVLLFLAFVVFLLVTLAILTALRLCAYCCNIVNVSLVKPSFYVYS
RVKNLNSSRVPDLLV
>QNO64837.1 |envelope protein [Severe acute respiratory syndrome coronavirus 2]
MYSFVSEETGTLIVNSVLLFLAFVVFLLVTLAILTALRLCAYCCNIVNVSLVKPSFYVYS
RVKNLNSSRVPDLLV
>QNO64849.1 |envelope protein [Severe acute respiratory syndrome coronavirus 2]
MYSFVSEETGTLIVNSVLLFLAFVVFLLVTLAILTALRLCAYCCNIVNVSLVKPSFYVYS
RVKNLNSSRVPDLLV
>QNO64861.1 |envelope protein [Severe acute respiratory syndrome coronavirus 2]
MYSFVSEETGTLIVNSVLLFLAFVVFLLVTLAILTALRLCAYCCNIVNVSLVKPSFYVYS
RVKNLNSSRVPDLLV
>QNO64873.1 |envelope protein [Severe acute respiratory syndrome coronavirus 2]
MYSFVSEETGTLIVNSVLLFLAFVVFLLVTLAILTALRLCAYCCNIVNVSLVKPSFYVYS
RVKNLNSSRVPDLLV
>QNO64885.1 |envelope protein [Severe acute respiratory syndrome coronavirus 2]
MYSFVSEETGTLIVNSVLLFLAFVVFLLVTLAILTALRLCAYCCNIVNVSLVKPSFYVYS
RVKNLNSSRVPDLLV
>QNO64897.1 |envelope protein [Severe acute respiratory syndrome coronavirus 2]
MYSFVSEETGTLIVNSVLLFLAFVVFLLVTLAILTALRLCAYCCNIVNVSLVKPSFYVYS
RVKNLNSSRVPDLLV
>QNO64909.1 |envelope protein [Severe acute respiratory syndrome coronavirus 2]
MYSFVSEETGTLIVNSVLLFLAFVVFLLVTLAILTALRLCAYCCNIVNVSLVKPSFYVYS
RVKNLNSSRVPDLLV
>QNO64921.1 |envelope protein [Severe acute respiratory syndrome coronavirus 2]
MYSFVSEETGTLIVNSVLLFLAFVVFLLVTLAILTALRLCAYCCNIVNVSLVKPSFYVYS
RVKNLNSSRVPDLLV
>QNO64933.1 |envelope protein [Severe acute respiratory syndrome coronavirus 2]
MYSFVSEETGTLIVNSVLLFLAFVVFLLVTLAILTALRLCAYCCNIVNVSLVKPSFYVYS
RVKNLNSSRVPDLLV
>QNO64945.1 |envelope protein [Severe acute respiratory syndrome coronavirus 2]
MYSFVSEETGTLIVNSVLLFLAFVVFLLVTLAILTALRLCAYCCNIVNVSLVKPSFYVYS
RVKNLNSSRVPDLLV
>QNO64957.1 |envelope protein [Severe acute respiratory syndrome coronavirus 2]
MYSFVSEETGTLIVNSVLLFFAFVVFLLVTLAILTALRLCAYCCNIVNVSLVKPSFYVYS
RVKNLNSSRVPDLLV
>QNO64969.1 |envelope protein [Severe acute respiratory syndrome coronavirus 2]
MYSFVSEETGTLIVNSVLLFLAFVVFLLVTLAILTALRLCAYCCNIVNVSLVKPSFYVYS
RVKNLNSSRVPDLLV
>QNO64981.1 |envelope protein [Severe acute respiratory syndrome coronavirus 2]
MYSFVSEETGTLIVNSVLLFLAFVVFLLVTLAILTALRLCAYCCNIVNVSLVKPSFYVYS
RVKNLNSSRVPDLLV
>QNO64993.1 |envelope protein [Severe acute respiratory syndrome coronavirus 2]
MYSFVSEETGTLIVNSVLLFLAFVVFLLVTLAILTALRLCAYCCNIVNVSLVKPSFYVYS
RVKNLNSSRVPDLLV
>QNO65005.1 |envelope protein [Severe acute respiratory syndrome coronavirus 2]
MYSFVSEETGTLIVNSVLLFLAFVVFLLVTLAILTALRLCAYCCNIVNVSLVKPSFYVYS
RVKNLNSSRVPDLLV
>QNO65017.1 |envelope protein [Severe acute respiratory syndrome coronavirus 2]
MYSFVSEETGTLIVNSVLLFLAFVVFLLVTLAILTALRLCAYCCNIVNVSLVKPSFYVYS
RVKNLNSSRVPDLLV
>QNO65029.1 |envelope protein [Severe acute respiratory syndrome coronavirus 2]
MYSFVSEETGTLIVNSVLLFLAFVVFLLVTLAILTALRLCAYCCNIVNVSLVKPSFYVYS
RVKNLNSSRVPDLLV
>QNO65041.1 |envelope protein [Severe acute respiratory syndrome coronavirus 2]
MYSFVSEETGTLIVNSVLLFLAFVVFLLVTLAILTALRLCAYCCNIVNVSLVKPSFYVYS
RVKNLNSSRVPDLLV
>QNO65053.1 |envelope protein [Severe acute respiratory syndrome coronavirus 2]
MYSFVSEETGTLIVNSVLLFLAFVVFLLVTLAILTALRLCAYCCNIVNVSLVKPSFYVYS
RVKNLNSSRVPDLLV
>QNO65065.1 |envelope protein [Severe acute respiratory syndrome coronavirus 2]
MYSFVSEETGTLIVNSVLLFLAFVVFLLVTLAILTALRLCAYCCNIVNVSLVKPSFYVYS
RVKNLNSSRVPDLLV
>QNO65077.1 |envelope protein [Severe acute respiratory syndrome coronavirus 2]
MYSFVSEETGTLIVNSVLLFLAFVVFLLVTLAILTALRLCAYCCNIVNVSLVKPSFYVYS
RVKNLNSSRVPDLLV
>QNO65089.1 |envelope protein [Severe acute respiratory syndrome coronavirus 2]
MYSFVSEETGTLIVNSVLLFLAFVVFLLVTLAILTALRLCAYCCNIVNVSLVKPSFYVYS
RVKNLNSSRVPDLLV
>QNO65101.1 |envelope protein [Severe acute respiratory syndrome coronavirus 2]
MYSFVSEETGTLIVNSVLLFLAFVVFLLVTLAILTALRLCAYCCNIVNVSLVKPSFYVYS
RVKNLNSSRVPDLLV
>QNO65113.1 |envelope protein [Severe acute respiratory syndrome coronavirus 2]
MYSFVSEETGTLIVNSVLLFLAFVVFLLVTLAILTALRLCAYCCNIVNVSLVKPSFYVYS
RVKNLNSSRVPDLLV
>QNO65125.1 |envelope protein [Severe acute respiratory syndrome coronavirus 2]
MYSFVSEETGTLIVNSVLLFLAFVVFLLVTLAILTALRLCAYCCNIVNVSLVKPSFYVYS
RVKNLNSSRVPDLLV
>QNO65137.1 |envelope protein [Severe acute respiratory syndrome coronavirus 2]
MYSFVSEETGTLIVNSVLLFLAFVVFLLVTLAILTALRLCAYCCNIVNVSLVKPSFYVYS
RVKNLNSSRVPDLLV
>QNO65149.1 |envelope protein [Severe acute respiratory syndrome coronavirus 2]
MYSFVSEETGTLIVNSVLLFLAFVVFLLVTLAILTALRLCAYCCNIVNVSLVKPSFYVYS
RVKNLNSSRVPDLLV
>QNO65161.1 |envelope protein [Severe acute respiratory syndrome coronavirus 2]
MYSFVSEETGTLIVNSVLLFLAFVVFLLVTLAILTALRLCAYCCNIVNVSLVKPSFYVYS
RVKNLNSSRVPDLLV
>QNO65173.1 |envelope protein [Severe acute respiratory syndrome coronavirus 2]
MYSFVSEETGTLIVNSVLLFLAFVVFLLVTLAILTALRLCAYCCNIVNVSLVKPSFYVYS
RVKNLNSSRVPDLLV
>QNO65185.1 |envelope protein [Severe acute respiratory syndrome coronavirus 2]
MYSFVSEETGTLIVNSVLLFLAFVVFLLVTLAILTALRLCAYCCNIVNVSLVKPSFYVYS
RVKNLNSSRVPDLLV
>QNO65197.1 |envelope protein [Severe acute respiratory syndrome coronavirus 2]
MYSFVSEETGTLIVNSVLLFLAFVVFLLVTLAILTALRLCAYCCNIVNVSLVKPSFYVYS
RVKNLNSSRVPDLLV
>QNO65209.1 |envelope protein [Severe acute respiratory syndrome coronavirus 2]
MYSFVSEETGTLIVNSVLLFLAFVVFLLVTLAILTALRLCAYCCNIVNVSLVKPSFYVYS
RVKNLNSSRVPDLLV
>QNO65221.1 |envelope protein [Severe acute respiratory syndrome coronavirus 2]
MYSFVSEETGTLIVNSVLLFLAFVVFLLVTLAILTALRLCAYCCNIVNVSLVKPSFYVYS
RVKNLNSSRVPDLLV
>QNO65233.1 |envelope protein [Severe acute respiratory syndrome coronavirus 2]
MYSFVSEETGTLIVNSVLLFLAFVVFLLVTLAILTALRLCAYCCNIVNVSLVKPSFYVYS
RVKNLNSSRVPDLLV
>QNO65245.1 |envelope protein [Severe acute respiratory syndrome coronavirus 2]
MYSFVSEETGTLIVNSVLLFLAFVVFLLVTLAILTALRLCAYCCNIVNVSLVKPSFYVYS
RVKNLNSSRVPDLLV
>QNO65257.1 |envelope protein [Severe acute respiratory syndrome coronavirus 2]
MYSFVSEETGTLIVNSVLLFLAFVVFLLVTLAILTALRLCAYCCNIVNVSLVKPSFYVYS
RVKNLNSSRVPDLLV
>QNO65269.1 |envelope protein [Severe acute respiratory syndrome coronavirus 2]
MYSFVSEETGTLIVNSVLLFLAFVVFLLVTLAILTALRLCAYCCNIVNVSLVKPSFYVYS
RVKNLNSSRVPDLLV
>QNO65281.1 |envelope protein [Severe acute respiratory syndrome coronavirus 2]
MYSFVSEETGTLIVNSVLLFLAFVVFLLVTLAILTALRLCAYCCNIVNVSLVKPSFYVYS
RVKNLNSSRVPDLLV
>QNO65293.1 |envelope protein [Severe acute respiratory syndrome coronavirus 2]
MYSFVSEETGTLIVNSVLLFLAFVVFLLVTLAILTALRLCAYCCNIVNVSLVKPSFYVYS
RVKNLNSSRVPDLLV
>QNO65305.1 |envelope protein [Severe acute respiratory syndrome coronavirus 2]
MYSFVSEETGTLIVNSVLLFLAFVVFLLVTLAILTALRLCAYCCNIVNVSLVKPSFYVYS
RVKNLNSSRVPDLLV
>QNO65317.1 |envelope protein [Severe acute respiratory syndrome coronavirus 2]
MYSFVSEETGTLIVNSVLLFLAFVVFLLVTLAILTALRLCAYCCNIVNVSLVKPSFYVYS
RVKNLNSSRVPDLLV
>QNO65329.1 |envelope protein [Severe acute respiratory syndrome coronavirus 2]
MYSFVSEETGTLIVNSVLLFLAFVVFLLVTLAILTALRLCAYCCNIVNVSLVKPSFYVYS
RVKNLNSSRVPDLLV
>QNO65341.1 |envelope protein [Severe acute respiratory syndrome coronavirus 2]
MYSFVSEETGTLIVNSVLLFLAFVVFLLVTLAILTALRLCAYCCNIVNVSLVKPSFYVYS
RVKNLNSSRVPDLLV
>QNO65353.1 |envelope protein [Severe acute respiratory syndrome coronavirus 2]
MYSFVSEETGTLIVNSVLLFLAFVVFLLVTLAILTALRLCAYCCNIVNVSLVKPSFYVYS
RVKNLNSSRVPDLLV
>QNO65365.1 |envelope protein [Severe acute respiratory syndrome coronavirus 2]
MYSFVSEETGTLIVNSVLLFLAFVVFLLVTLAILTALRLCAYCCNIVNVSLVKPSFYVYS
RVKNLNSSRVPDLLV
>QNO65377.1 |envelope protein [Severe acute respiratory syndrome coronavirus 2]
MYSFVSEETGTLIVNSVLLFLAFVVFLLVTLAILTALRLCAYCCNIVNVSLVKPSFYVYS
RVKNLNSSRVPDLLV
>QNO65389.1 |envelope protein [Severe acute respiratory syndrome coronavirus 2]
MYSFVSEETGTLIVNSVLLFLAFVVFLLVTLAILTALRLCAYCCNIVNVSLVKPSFYVYS
RVKNLNSSRVPDLLV
>QNO65401.1 |envelope protein [Severe acute respiratory syndrome coronavirus 2]
MYSFVSEETGTLIVNSVLLFLAFVVFLLVTLAILTALRLCAYCCNIVNVSLVKPSFYVYS
RVKNLNSSRVPDLLV
>QNO65413.1 |envelope protein [Severe acute respiratory syndrome coronavirus 2]
MYSFVSEETGTLIVNSVLLFLAFVVFLLVTLAILTALRLCAYCCNIVNVSLVKPSFYVYS
RVKNLNSSRVPDLLV
>QNO65425.1 |envelope protein [Severe acute respiratory syndrome coronavirus 2]
MYSFVSEETGTLIVNSVLLFLAFVVFLLVTLAILTALRLCAYCCNIVNVSLVKPSFYVYS
RVKNLNSSRVPDLLV
>QNO65437.1 |envelope protein [Severe acute respiratory syndrome coronavirus 2]
MYSFVSEETGTLIVNSVLLFLAFVVFLLVTLAILTALRLCAYCCNIVNVSLVKPSFYVYS
RVKNLNSSRVPDLLV
>QNO65449.1 |envelope protein [Severe acute respiratory syndrome coronavirus 2]
MYSFVSEETGTLIVNSVLLFLAFVVFLLVTLAILTALRLCAYCCNIVNVSLVKPSFYVYS
RVKNLNSSRVPDLLV
>QNO65461.1 |envelope protein [Severe acute respiratory syndrome coronavirus 2]
MYSFVSEETGTLIVNSVLLFLAFVVFLLVTLAILTALRLCAYCCNIVNVSLVKPSFYVYS
RVKNLNSSRVPDLLV
>QNO65473.1 |envelope protein [Severe acute respiratory syndrome coronavirus 2]
MYSFVSEETGTLIVNSVLLFLAFVVFLLVTLAILTALRLCAYCCNIVNVSLVKPSFYVYS
RVKNLNSSRVPDLLV
>QNO65485.1 |envelope protein [Severe acute respiratory syndrome coronavirus 2]
MYSFVSEETGTLIVNSVLLFLAFVVFLLVTLAILTALRLCAYCCNIVNVSLVKPSFYVYS
RVKNLNSSRVPDLLV
>QNO65497.1 |envelope protein [Severe acute respiratory syndrome coronavirus 2]
MYSFVSEETGTLIVNSVLLFLAFVVFLLVTLAILTALRLCAYCCNIVNVSLVKPSFYVYS
RVKNLNSSRVPDLLV
>QNO65509.1 |envelope protein [Severe acute respiratory syndrome coronavirus 2]
MYSFVSEETGTLIVNSVLLFLAFVVFLLVTLAILTALRLCAYCCNIVNVSLVKPSFYVYS
RVKNLNSSRVPDLLV
>QNO65521.1 |envelope protein [Severe acute respiratory syndrome coronavirus 2]
MYSFVSEETGTLIVNSVLLFLAFVVFLLVTLAILTALRLCAYCCNIVNVSLVKPSFYVYS
RVKNLNSSRVPDLLV
>QNO65533.1 |envelope protein [Severe acute respiratory syndrome coronavirus 2]
MYSFVSEETGTLIVNSVLLFLAFVVFLLVTLAILTALRLCAYCCNIVNVSLVKPSFYVYS
RVKNLNSSRVPDLLV
>QNO65545.1 |envelope protein [Severe acute respiratory syndrome coronavirus 2]
MYSFVSEETGTLIVNSVLLFLAFVVFLLVTLAILTALRLCAYCCNIVNVSLVKPSFYVYS
RVKNLNSSRVPDLLV
>QNO65557.1 |envelope protein [Severe acute respiratory syndrome coronavirus 2]
MYSFVSEETGTLIVNSVLLFLAFVVFLLVTLAILTALRLCAYCCNIVNVSLVKPSFYVYS
RVKNLNSSRVPDLLV
>QNO65569.1 |envelope protein [Severe acute respiratory syndrome coronavirus 2]
MYSFVSEETGTLIVNSVLLFLAFVVFLLVTLAILTALRLCAYCCNIVNVSLVKPSFYVYS
RVKNLNSSRVPDLLV
>QNO65581.1 |envelope protein [Severe acute respiratory syndrome coronavirus 2]
MYSFVSEETGTLIVNSVLLFLAFVVFLLVTLAILTALRLCAYCCNIVNVSLVKPSFYVYS
RVKNLNSSRVPDLLV
>QNO65593.1 |envelope protein [Severe acute respiratory syndrome coronavirus 2]
MYSFVSEETGTLIVNSVLLFLAFVVFLLVTLAILTALRLCAYCCNIVNVSLVKPSFYVYS
RVKNLNSSRVPDLLV
>QNO65605.1 |envelope protein [Severe acute respiratory syndrome coronavirus 2]
MYSFVSEETGTLIVNSVLLFLAFVVFLLVTLAILTALRLCAYCCNIVNVSLVKPSFYVYS
RVKNLNSSRVPDLLV
>QNO65617.1 |envelope protein [Severe acute respiratory syndrome coronavirus 2]
MYSFVSEETGTLIVNSVLLFLAFVVFLLVTLAILTALRLCAYCCNIVNVSLVKPSFYVYS
RVKNLNSSRVPDLLV
>QNO65629.1 |envelope protein [Severe acute respiratory syndrome coronavirus 2]
MYSFVSEETGTLIVNSVLLFLAFVVFLLVTLAILTALRLCAYCCNIVNVSLVKPSFYVYS
RVKNLNSSRVPDLLV
>QNO65641.1 |envelope protein [Severe acute respiratory syndrome coronavirus 2]
MYSFVSEETGTLIVNSVLLFLAFVVFLLVTLAILTALRLCAYCCNIVNVSLVKPSFYVYS
RVKNLNSSRVPDLLV
>QNO65653.1 |envelope protein [Severe acute respiratory syndrome coronavirus 2]
MYSFVSEETGTLIVNSVLLFLAFVVFLLVTLAILTALRLCAYCCNIVNVSLVKPSFYVYS
RVKNLNSSRVPDLLV
>QNO65665.1 |envelope protein [Severe acute respiratory syndrome coronavirus 2]
MYSFVSEETGTLIVNSVLLFLAFVVFLLVTLAILTALRLCAYCCNIVNVSLVKPSFYVYS
RVKNLNSSRVPDLLV
>QNO65677.1 |envelope protein [Severe acute respiratory syndrome coronavirus 2]
MYSFVSEETGTLIVNSVLLFLAFVVFLLVTLAILTALRLCAYCCNIVNVSLVKPSFYVYS
RVKNLNSSRVPDLLV
>QNO65689.1 |envelope protein [Severe acute respiratory syndrome coronavirus 2]
MYSFVSEETGTLIVNSVLLFLAFVVFLLVTLAILTALRLCAYCCNIVNVSLVKPSFYVYS
RVKNLNSSRVPDLLV
>QNO65701.1 |envelope protein [Severe acute respiratory syndrome coronavirus 2]
MYSFVSEETGTLIVNSVLLFLAFVVFLLVTLAILTALRLCAYCCNIVNVSLVKPSFYVYS
RVKNLNSSRVPDLLV
>QNO65713.1 |envelope protein [Severe acute respiratory syndrome coronavirus 2]
MYSFVSEETGTLIVNSVLLFLAFVVFLLVTLAILTALRLCAYCCNIVNVSLVKPSFYVYS
RVKNLNSSRVPDLLV
>QNO65725.1 |envelope protein [Severe acute respiratory syndrome coronavirus 2]
MYSFVSEETGTLIVNSVLLFLAFVVFLLVTLAILTALRLCAYCCNIVNVSLVKPSFYVYS
RVKNLNSSRVPDLLV
>QNO65737.1 |envelope protein [Severe acute respiratory syndrome coronavirus 2]
MYSFVSEETGTLIVNSVLLFLAFVVFLLVTLAILTALRLCAYCCNIVNVSLVKPSFYVYS
RVKNLNSSRVPDLLV
>QNO65749.1 |envelope protein [Severe acute respiratory syndrome coronavirus 2]
MYSFVSEETGTLIVNSVLLFLAFVVFLLVTLAILTALRLCAYCCNIVNVSLVKPSFYVYS
RVKNLNSSRVPDLLV
>QNO65761.1 |envelope protein [Severe acute respiratory syndrome coronavirus 2]
MYSFVSEETGTLIVNSVLLFLAFVVFLLVTLAILTALRLCAYCCNIVNVSLVKPSFYVYS
RVKNLNSSRVPDLLV
>QNO65773.1 |envelope protein [Severe acute respiratory syndrome coronavirus 2]
MYSFVSEETGTLIVNSVLLFLAFVVFLLVTLAILTALRLCAYCCNIVNVSLVKPSFYVYS
RVKNLNSSRVPDLLV
>QNO65785.1 |envelope protein [Severe acute respiratory syndrome coronavirus 2]
MYSFVSEETGTLIVNSVLLFLAFVVFLLVTLAILTALRLCAYCCNIVNVSLVKPSFYVYS
RVKNLNSSRVPDLLV
>QNO65797.1 |envelope protein [Severe acute respiratory syndrome coronavirus 2]
MYSFVSEETGTLIVNSVLLFLAFVVFLLVTLAILTALRLCAYCCNIVNVSLVKPSFYVYS
RVKNLNSSRVPDLLV
>QNO65809.1 |envelope protein [Severe acute respiratory syndrome coronavirus 2]
MYSFVSEETGTLIVNSVLLFLAFVVFLLVTLAILTALRLCAYCCNIVNVSLVKPSFYVYS
RVKNLNSSRVPDLLV
>QNO65821.1 |envelope protein [Severe acute respiratory syndrome coronavirus 2]
MYSFVSEETGTLIVNSVLLFLAFVVFLLVTLAILTALRLCAYCCNIVNVSLVKPSFYVYS
RVKNLNSSRVPDLLV
>QNO65833.1 |envelope protein [Severe acute respiratory syndrome coronavirus 2]
MYSFVSEETGTLIVNSVLLFLAFVVFLLVTLAILTALRLCAYCCNIVNVSLVKPSFYVYS
RVKNLNSSRVPDLLV
>QNO65845.1 |envelope protein [Severe acute respiratory syndrome coronavirus 2]
MYSFVSEETGTLIVNSVLLFLAFVVFLLVTLAILTALRLCAYCCNIVNVSLVKPSFYVYS
RVKNLNSSRVPDLLV
>QNO65857.1 |envelope protein [Severe acute respiratory syndrome coronavirus 2]
MYSFVSEETGTLIVNSVLLFLAFVVFLLVTLAILTALRLCAYCCNIVNVSLVKPSFYVYS
RVKNLNSSRVPDLLV
>QNO65869.1 |envelope protein [Severe acute respiratory syndrome coronavirus 2]
MYSFVSEETGTLIVNSVLLFLAFVVFLLVTLAILTALRLCAYCCNIVNVSLVKPSFYVYS
RVKNLNSSRVPDLLV
>QNO65881.1 |envelope protein [Severe acute respiratory syndrome coronavirus 2]
MYSFVSEETGTLIVNSVLLFLAFVVFLLVTLAILTALRLCAYCCNIVNVSLVKPSFYVYS
RVKNLNSSRVPDLLV
>QNO65893.1 |envelope protein [Severe acute respiratory syndrome coronavirus 2]
MYSFVSEETGTLIVNSVLLFLAFVVFLLVTLAILTALRLCAYCCNIVNVSLVKPSFYVYS
RVKNLNSSRVPDLLV
>QNO65905.1 |envelope protein [Severe acute respiratory syndrome coronavirus 2]
MYSFVSEETGTLIVNSVLLFLAFVVFLLVTLAILTALRLCAYCCNIVNVSLVKPSFYVYS
RVKNLNSSRVPDLLV
>QNO65917.1 |envelope protein [Severe acute respiratory syndrome coronavirus 2]
MYSFVSEETGTLIVNSVLLFLAFVVFLLVTLAILTALRLCAYCCNIVNVSLVKPSFYVYS
RVKNLNSSRVPDLLV
>QNO65929.1 |envelope protein [Severe acute respiratory syndrome coronavirus 2]
MYSFVSEETGTLIVNSVLLFLAFVVFLLVTLAILTALRLCAYCCNIVNVSLVKPSFYVYS
RVKNLNSSRVPDLLV
>QNO65941.1 |envelope protein [Severe acute respiratory syndrome coronavirus 2]
MYSFVSEETGTLIVNSVLLFLAFVVFLLVTLAILTALRLCAYCCNIVNVSLVKPSFYVYS
RVKNLNSSRVPDLLV
>QNO65953.1 |envelope protein [Severe acute respiratory syndrome coronavirus 2]
MYSFVSEETGTLIVNSVLLFLAFVVFLLVTLAILTALRLCAYCCNIVNVSLVKPSFYVYS
RVKNLNSSRVPDLLV
>QNO65965.1 |envelope protein [Severe acute respiratory syndrome coronavirus 2]
MYSFVSEETGTLIVNSVLLFLAFVVFLLVTLAILTALRLCAYCCNIVNVSLVKPSFYVYS
RVKNLNSSRVPDLLV
>QNO65977.1 |envelope protein [Severe acute respiratory syndrome coronavirus 2]
MYSFVSEETGTLIVNSVLLFLAFVVFLLVTLAILTALRLCAYCCNIVNVSLVKPSFYVYS
RVKNLNSSRVPDLLV
>QNO65989.1 |envelope protein [Severe acute respiratory syndrome coronavirus 2]
MYSFVSEETGTLIVNSVLLFLAFVVFLLVTLAILTALRLCAYCCNIVNVSLVKPSFYVYS
RVKNLNSSRVPDLLV
>QNO66001.1 |envelope protein [Severe acute respiratory syndrome coronavirus 2]
MYSFVSEETGTLIVNSVLLFLAFVVFLLVTLAILTALRLCAYCCNIVNVSLVKPSFYVYS
RVKNLNSSRVPDLLV
>QNO66013.1 |envelope protein [Severe acute respiratory syndrome coronavirus 2]
MYSFVSEETGTLIVNSVLLFLAFVVFLLVTLAILTALRLCAYCCNIVNVSLVKPSFYVYS
RVKNLNSSRVPDLLV
>QNO66025.1 |envelope protein [Severe acute respiratory syndrome coronavirus 2]
MYSFVSEETGTLIVNSVLLFLAFVVFLLVTLAILTALRLCAYCCNIVNVSLVKPSFYVYS
RVKNLNSSRVPDLLV
>QNO66037.1 |envelope protein [Severe acute respiratory syndrome coronavirus 2]
MYSFVSEETGTLIVNSVLLFLAFVVFLLVTLAILTALRLCAYCCNIVNVSLVKPSFYVYS
RVKNLNSSRVPDLLV
>QNO66049.1 |envelope protein [Severe acute respiratory syndrome coronavirus 2]
MYSFVSEETGTLIVNSVLLFLAFVVFLLVTLAILTALRLCAYCCNIVNVSLVKPSFYVYS
RVKNLNSSRVPDLLV
>QNO66061.1 |envelope protein [Severe acute respiratory syndrome coronavirus 2]
MYSFVSEETGTLIVNSVLLFLAFVVFLLVTLAILTALRLCAYCCNIVNVSLVKPSFYVYS
RVKNLNSSRVPDLLV
>QNO66073.1 |envelope protein [Severe acute respiratory syndrome coronavirus 2]
MYSFVSEETGTLIVNSVLLFLAFVVFLLVTLAILTALRLCAYCCNIVNVSLVKPSFYVYS
RVKNLNSSRVPDLLV
>QNO66085.1 |envelope protein [Severe acute respiratory syndrome coronavirus 2]
MYSFVSEETGTLIVNSVLLFLAFVVFLLVTLAILTALRLCAYCCNIVNVSLVKPSFYVYS
RVKNLNSSRVPDLLV
>QNO66097.1 |envelope protein [Severe acute respiratory syndrome coronavirus 2]
MYSFVSEETGTLIVNSVLLFLAFVVFLLVTLAILTALRLCAYCCNIVNVSLVKPSFYVYS
RVKNLNSSRVPDLLV
>QNO66109.1 |envelope protein [Severe acute respiratory syndrome coronavirus 2]
MYSFVSEETGTLIVNSVLLFLAFVVFLLVTLAILTALRLCAYCCNIVNVSLVKPSFYVYS
RVKNLNSSRVPDLLV
>QNO66121.1 |envelope protein [Severe acute respiratory syndrome coronavirus 2]
MYSFVSEETGTLIVNSVLLFLAFVVFLLVTLAILTALRLCAYCCNIVNVSLVKPSFYVYS
RVKNLNSSRVPDLLV
>QNO66133.1 |envelope protein [Severe acute respiratory syndrome coronavirus 2]
MYSFVSEETGTLIVNSVLLFLAFVVFLLVTLAILTALRLCAYCCNIVNVSLVKPSFYVYS
RVKNLNSSRVPDLLV
>QNO66145.1 |envelope protein [Severe acute respiratory syndrome coronavirus 2]
MYSFVSEETGTLIVNSVLLFLAFVVFLLVTLAILTALRLCAYCCNIVNVSLVKPSFYVYS
RVKNLNSSRVPDLLV
>QNO66157.1 |envelope protein [Severe acute respiratory syndrome coronavirus 2]
MYSFVSEETGTLIVNSVLLFLAFVVFLLVTLAILTALRLCAYCCNIVNVSLVKPSFYVYS
RVKNLNSSRVPDLLV
>QNO66169.1 |envelope protein [Severe acute respiratory syndrome coronavirus 2]
MYSFVSEETGTLIVNSVLLFLAFVVFLLVTLAILTALRLCAYCCNIVNVSLVKPSFYVYS
RVKNLNSSRVPDLLV
>QNO66181.1 |envelope protein [Severe acute respiratory syndrome coronavirus 2]
MYSFVSEETGTLIVNSVLLFLAFVVFLLVTLAILTALRLCAYCCNIVNVSLVKPSFYVYS
RVKNLNSSRVPDLLV
>QNO66193.1 |envelope protein [Severe acute respiratory syndrome coronavirus 2]
MYSFVSEETGTLIVNSVLLFLAFVVFLLVTLAILTALRLCAYCCNIVNVSLVKPSFYVYS
RVKNLNSSRVPDLLV
>QNO66205.1 |envelope protein [Severe acute respiratory syndrome coronavirus 2]
MYSFVSEETGTLIVNSVLLFLAFVVFLLVTLAILTALRLCAYCCNIVNVSLVKPSFYVYS
RVKNLNSSRVPDLLV
>QNO66217.1 |envelope protein [Severe acute respiratory syndrome coronavirus 2]
MYSFVSEETGTLIVNSVLLFLAFVVFLLVTLAILTALRLCAYCCNIVNVSLVKPSFYVYS
RVKNLNSSRVPDLLV
>QNO66229.1 |envelope protein [Severe acute respiratory syndrome coronavirus 2]
MYSFVSEETGTLIVNSVLLFLAFVVFLLVTLAILTALRLCAYCCNIVNVSLVKPSFYVYS
RVKNLNSSRVPDLLV
>QNO66241.1 |envelope protein [Severe acute respiratory syndrome coronavirus 2]
MYSFVSEETGTLIVNSVLLFLAFVVFLLVTLAILTALRLCAYCCNIVNVSLVKPSFYVYS
RVKNLNSSRVPDLLV
>QNO66253.1 |envelope protein [Severe acute respiratory syndrome coronavirus 2]
MYSFVSEETGTLIVNSVLLFLAFVVFLLVTLAILTALRLCAYCCNIVNVSLVKPSFYVYS
RVKNLNSSRVPDLLV
>QNO66265.1 |envelope protein [Severe acute respiratory syndrome coronavirus 2]
MYSFVSEETGTLIVNSVLLFLAFVVFLLVTLAILTALRLCAYCCNIVNVSLVKPSFYVYS
RVKNLNSSRVPDLLV
>QNO66277.1 |envelope protein [Severe acute respiratory syndrome coronavirus 2]
MYSFVSEETGTLIVNSVLLFLAFVVFLLVTLAILTALRLCAYCCNIVNVSLVKPSFYVYS
RVKNLNSSRVPDLLV
>QNO66289.1 |envelope protein [Severe acute respiratory syndrome coronavirus 2]
MYSFVSEETGTLIVNSVLLFLAFVVFLLVTLAILTALRLCAYCCNIVNVSLVKPSFYVYS
RVKNLNSSRVPDLLV
>QNO66301.1 |envelope protein [Severe acute respiratory syndrome coronavirus 2]
MYSFVSEETGTLIVNSVLLFLAFVVFLLVTLAILTALRLCAYCCNIVNVSLVKPSFYVYS
RVKNLNSSRVPDLLV
>QNO66313.1 |envelope protein [Severe acute respiratory syndrome coronavirus 2]
MYSFVSEETGTLIVNSVLLFLAFVVFLLVTLAILTALRLCAYCCNIVNVSLVKPSFYVYS
RVKNLNSSRVPDLLV
>QNO66325.1 |envelope protein [Severe acute respiratory syndrome coronavirus 2]
MYSFVSEETGTLIVNSVLLFLAFVVFLLVTLAILTALRLCAYCCNIVNVSLVKPSFYVYS
RVKNLNSSRVPDLLV
>QNO66337.1 |envelope protein [Severe acute respiratory syndrome coronavirus 2]
MYSFVSEETGTLIVNSVLLFLAFVVFLLVTLAILTALRLCAYCCNIVNVSLVKPSFYVYS
RVKNLNSSRVPDLLV
>QNO66349.1 |envelope protein [Severe acute respiratory syndrome coronavirus 2]
MYSFVSEETGTLIVNSVLLFLAFVVFLLVTLAILTALRLCAYCCNIVNVSLVKPSFYVYS
RVKNLNSSRVPDLLV
>QNO66361.1 |envelope protein [Severe acute respiratory syndrome coronavirus 2]
MYSFVSEETGTLIVNSVLLFLAFVVFLLVTLAILTALRLCAYCCNIVNVSLVKPSFYVYS
RVKNLNSSRVPDLLV
>QNO66373.1 |envelope protein [Severe acute respiratory syndrome coronavirus 2]
MYSFVSEETGTLIVNSVLLFLAFVVFLLVTLAILTALRLCAYCCNIVNVSLVKPSFYVYS
RVKNLNSSRVPDLLV
>QNO66385.1 |envelope protein [Severe acute respiratory syndrome coronavirus 2]
MYSFVSEETGTLIVNSVLLFLAFVVFLLVTLAILTALRLCAYCCNIVNVSLVKPSFYVYS
RVKNLNSSRVPDLLV
>QNO66397.1 |envelope protein [Severe acute respiratory syndrome coronavirus 2]
MYSFVSEETGTLIVNSVLLFLAFVVFLLVTLAILTALRLCAYCCNIVNVSLVKPSFYVYS
RVKNLNSSRVPDLLV
>QNO66409.1 |envelope protein [Severe acute respiratory syndrome coronavirus 2]
MYSFVSEETGTLIVNSVLLFLAFVVFLLVTLAILTALRLCAYCCNIVNVSLVKPSFYVYS
RVKNLNSSRVPDLLV
>QNO66421.1 |envelope protein [Severe acute respiratory syndrome coronavirus 2]
MYSFVSEETGTLIVNSVLLFLAFVVFLLVTLAILTALRLCAYCCNIVNVSLVKPSFYVYS
RVKNLNSSRVPDLLV
>QNO66433.1 |envelope protein [Severe acute respiratory syndrome coronavirus 2]
MYSFVSEETGTLIVNSVLLFLAFVVFLLVTLAILTALRLCAYCCNIVNVSLVKPSFYVYS
RVKNLNSSRVPDLLV
>QNO66445.1 |envelope protein [Severe acute respiratory syndrome coronavirus 2]
MYSFVSEETGTLIVNSVLLFLAFVVFLLVTLAILTALRLCAYCCNIVNVSLVKPSFYVYS
RVKNLNSSRVPDLLV
>QNO66457.1 |envelope protein [Severe acute respiratory syndrome coronavirus 2]
MYSFVSEETGTLIVNSVLLFLAFVVFLLVTLAILTALRLCAYCCNIVNVSLVKPSFYVYS
RVKNLNSSRVPDLLV
>QNO66469.1 |envelope protein [Severe acute respiratory syndrome coronavirus 2]
MYSFVSEETGTLIVNSVLLFLAFVVFLLVTLAILTALRLCAYCCNIVNVSLVKPSFYVYS
RVKNLNSSRVPDLLV
>QNO66481.1 |envelope protein [Severe acute respiratory syndrome coronavirus 2]
MYSFVSEETGTLIVNSVLLFLAFVVFLLVTLAILTALRLCAYCCNIVNVSLVKPSFYVYS
RVKNLNSSRVPDLLV
>QNO66493.1 |envelope protein [Severe acute respiratory syndrome coronavirus 2]
MYSFVSEETGTLIVNSVLLFLAFVVFLLVTLAILTALRLCAYCCNIVNVSLVKPSFYVYS
RVKNLNSSRVPDLLV
>QNO66505.1 |envelope protein [Severe acute respiratory syndrome coronavirus 2]
MYSFVSEETGTLIVNSVLLFLAFVVFLLVTLAILTALRLCAYCCNIVNVSLVKPSFYVYS
RVKNLNSSRVPDLLV
>QNO66517.1 |envelope protein [Severe acute respiratory syndrome coronavirus 2]
MYSFVSEETGTLIVNSVLLFLAFVVFLLVTLAILTALRLCAYCCNIVNVSLVKPSFYVYS
RVKNLNSSRVPDLLV
>QNO66529.1 |envelope protein [Severe acute respiratory syndrome coronavirus 2]
MYSFVSEETGTLIVNSVLLFLAFVVFLLVTLAILTALRLCAYCCNIVNVSLVKPSFYVYS
RVKNLNSSRVPDLLV
>QNO66541.1 |envelope protein [Severe acute respiratory syndrome coronavirus 2]
MYSFVSEETGTLIVNSVLLFLAFVVFLLVTLAILTALRLCAYCCNIVNVSLVKPSFYVYS
RVKNLNSSRVPDLLV
>QNO66553.1 |envelope protein [Severe acute respiratory syndrome coronavirus 2]
MYSFVSEETGTLIVNSVLLFLAFVVFLLVTLAILTALRLCAYCCNIVNVSLVKPSFYVYS
RVKNLNSSRVPDLLV
>QNO66565.1 |envelope protein [Severe acute respiratory syndrome coronavirus 2]
MYSFVSEETGTLIVNSVLLFLAFVVFLLVTLAILTALRLCAYCCNIVNVSLVKPSFYVYS
RVKNLNSSRVPDLLV
>QNO66577.1 |envelope protein [Severe acute respiratory syndrome coronavirus 2]
MYSFVSEETGTLIVNSVLLFLAFVVFLLVTLAILTALRLCAYCCNIVNVSLVKPSFYVYS
RVKNLNSSRVPDLLV
>QNO66589.1 |envelope protein [Severe acute respiratory syndrome coronavirus 2]
MYSFVSEETGTLIVNSVLLFLAFVVFLLVTLAILTALRLCAYCCNIVNVSLVKPSFYVYS
RVKNLNSSRVPDLLV
>QNO66601.1 |envelope protein [Severe acute respiratory syndrome coronavirus 2]
MYSFVSEETGTLIVNSVLLFLAFVVFLLVTLAILTALRLCAYCCNIVNVSLVKPSFYVYS
RVKNLNSSRVPDLLV
>QNO66613.1 |envelope protein [Severe acute respiratory syndrome coronavirus 2]
MYSFVSEETGTLIVNSVLLFLAFVVFLLVTLAILTALRLCAYCCNIVNVSLVKPSFYVYS
RVKNLNSSRVPDLLV
>QNO66625.1 |envelope protein [Severe acute respiratory syndrome coronavirus 2]
MYSFVSEETGTLIVNSVLLFLAFVVFLLVTLAILTALRLCAYCCNIVNVSLVKPSFYVYS
RVKNLNSSRVPDLLV
>QNO66649.1 |envelope protein [Severe acute respiratory syndrome coronavirus 2]
MYSFVSEETGTLIVNSVLLFLAFVVFLLVTLAILTALRLCAYCCNIVNVSLVKPSFYVYS
RVKNLNSSRVPDLLV
>QNO66661.1 |envelope protein [Severe acute respiratory syndrome coronavirus 2]
MYSFVSEETGTLIVNSVLLFLAFVVFLLVTLAILTALRLCAYCCNIVNVSLVKPSFYVYS
RVKNLNSSRVPDLLV
>QNO66685.1 |envelope protein [Severe acute respiratory syndrome coronavirus 2]
MYSFVSEETGTLIVNSVLLFLAFVVFLLVTLAILTALRLCAYCCNIVNVSLVKPSFYVYS
RVKNLNSSRVPDLLV
>QNO66697.1 |envelope protein [Severe acute respiratory syndrome coronavirus 2]
MYSFVSEETGTLIVNSVLLFLAFVVFLLVTLAILTALRLCAYCCNIVNVSLVKPSFYVYS
RVKNLNSSRVPDLLV
>QNO66721.1 |envelope protein [Severe acute respiratory syndrome coronavirus 2]
MYSFVSEETGTLIVNSVLLFLAFVVFLLVTLAILTALRLCAYCCNIVNVSLVKPSFYVYS
RVKNLNSSRVPDLLV
>QNO66733.1 |envelope protein [Severe acute respiratory syndrome coronavirus 2]
MYSFVSEETGTLIVNSVLLFLAFVVFLLVTLAILTALRLCAYCCNIVNVSLVKPSFYVYS
RVKNLNSSRVPDLLV
>QNO66745.1 |envelope protein [Severe acute respiratory syndrome coronavirus 2]
MYSFVSEETGTLIVNSVLLFLAFVVFLLVTLAILTALRLCAYCCNIVNVSLVKPSFYVYS
RVKNLNSSRVPDLLV
>QNO66757.1 |envelope protein [Severe acute respiratory syndrome coronavirus 2]
MYSFVSEETGTLIVNSVLLFLAFVVFLLVTLAILTALRLCAYCCNIVNVSLVKPSFYVYS
RVKNLNSSRVPDLLV
>QNO66781.1 |envelope protein [Severe acute respiratory syndrome coronavirus 2]
MYSFVSEETGTLIVNSVLLFLAFVVFLLVTLAILTALRLCAYCCNIVNVSLVKPSFYVYS
RVKNLNSSRVPDLLV
>QNO66793.1 |envelope protein [Severe acute respiratory syndrome coronavirus 2]
MYSFVSEETGTLIVNSVLLFLAFVVFLLVTLAILTALRLCAYCCNIVNVSLVKPSFYVYS
RVKNLNSSRVPDLLV
>QNO66805.1 |envelope protein [Severe acute respiratory syndrome coronavirus 2]
MYSFVSEETGTLIVNSVLLFLAFVVFLLVTLAILTALRLCAYCCNIVNVSLVKPSFYVYS
RVKNLNSSRVPDLLV
>QNO66829.1 |envelope protein [Severe acute respiratory syndrome coronavirus 2]
MYSFVSEETGTLIVNSVLLFLAFVVFLLVTLAILTALRLCAYCCNIVNVSLVKPSFYVYS
RVKNLNSSRVPDLLV
>QNO66841.1 |envelope protein [Severe acute respiratory syndrome coronavirus 2]
MYSFVSEETGTLIVNSVLLFLAFVVFLLVTLAILTALRLCAYCCNIVNVSLVKPSFYVYS
RVKNLNSSRVPDLLV
>QNO66853.1 |envelope protein [Severe acute respiratory syndrome coronavirus 2]
MYSFVSEETGTLIVNSVLLFLAFVVFLLVTLAILTALRLCAYCCNIVNVSLVKPSFYVYS
RVKNLNSSRVPDLLV
>QNO66865.1 |envelope protein [Severe acute respiratory syndrome coronavirus 2]
MYSFVSEETGTLIVNSVLLFLAFVVFLLVTLAILTALRLCAYCCNIVNVSLVKPSFYVYS
RVKNLNSSRVPDLLV
>QNO66889.1 |envelope protein [Severe acute respiratory syndrome coronavirus 2]
MYSFVSEETGTLIVNSVLLFLAFVVFLLVTLAILTALRLCAYCCNIVNVSLVKPSFYVYS
RVKNLNSSRVPDLLV
>QNO66901.1 |envelope protein [Severe acute respiratory syndrome coronavirus 2]
MYSFVSEETGTLIVNSVLLFLAFVVFLLVTLAILTALRLCAYCCNIVNVSLVKPSFYVYS
RVKNLNSSRVPDLLV
>QNO66925.1 |envelope protein [Severe acute respiratory syndrome coronavirus 2]
MYSFVSEETGTLIVNSVLLFLAFVVFLLVTLAILTALRLCAYCCNIVNVSLVKPSFYVYS
RVKNLNSSRVPDLLV
>QNO66937.1 |envelope protein [Severe acute respiratory syndrome coronavirus 2]
MYSFVSEETGTLIVNSVLLFLAFVVFLLVTLAILTALRLCAYCCNIVNVSLVKPSFYVYS
RVKNLNSSRVPDLLV
>QNO66985.1 |envelope protein [Severe acute respiratory syndrome coronavirus 2]
MYSFVSEETGTLIVNSVLLFLAFVVFLLVTLAILTALRLCAYCCNIVNVSLVKPSFYVYS
RVKNLNSSRVPDLLV
>QNO66997.1 |envelope protein [Severe acute respiratory syndrome coronavirus 2]
MYSFVSEETGTLIVNSVLLFLAFVVFLLVTLAILTALRLCAYCCNIVNVSLVKPSFYVYS
RVKNLNSSRVPDLLV
>QNO67009.1 |envelope protein [Severe acute respiratory syndrome coronavirus 2]
MYSFVSEETGTLIVNSVLLFLAFVVFLLVTLAILTALRLCAYCCNIVNVSLVKPSFYVYS
RVKNLNSSRVPDLLV
>QNO67033.1 |envelope protein [Severe acute respiratory syndrome coronavirus 2]
MYSFVSEETGTLIVNSVLLFLAFVVFLLVTLAILTALRLCAYCCNIVNVSLVKPSFYVYS
RVKNLNSSRVPDLLV
>QNO67045.1 |envelope protein [Severe acute respiratory syndrome coronavirus 2]
MYSFVSEETGTLIVNSVLLFLAFVVFLLVTLAILTALRLCAYCCNIVNVSLVKPSFYVYS
RVKNLNSSRVPDLLV
>QNO67069.1 |envelope protein [Severe acute respiratory syndrome coronavirus 2]
MYSFVSEETGTLIVNSVLLFLAFVVFLLVTLAILTALRLCAYCCNIVNVSLVKPSFYVYS
RVKNLNSSRVPDLLV
>QNO67081.1 |envelope protein [Severe acute respiratory syndrome coronavirus 2]
MYSFVSEETGTLIVNSVLLFLAFVVFLLVTLAILTALRLCAYCCNIVNVSLVKPSFYVYS
RVKNLNSSRVPDLLV
>QNO67105.1 |envelope protein [Severe acute respiratory syndrome coronavirus 2]
MYSFVSEETGTLIVNSVLLFLAFVVFLLVTLAILTALRLCAYCCNIVNVSLVKPSFYVYS
RVKNLNSSRVPDLLV
>QNO67129.1 |envelope protein [Severe acute respiratory syndrome coronavirus 2]
MYSFVSEETGTLIVNSVLLFLAFVVFLLVTLAILTALRLCASCCNIVNVSLVKPSFYVYS
RVKNLNSSRVPDLLL
>QNO67141.1 |envelope protein [Severe acute respiratory syndrome coronavirus 2]
MYSFVSEETGTLIVNSVLLFLAFVVFLLVTLAILTALRLCAYCCNIVNVSLVKPSFYVYS
RVKNLNSSRVPDLLV
>QNO67153.1 |envelope protein [Severe acute respiratory syndrome coronavirus 2]
MYSFVSEETGTLIVNSVLLFLAFVVFLLVTLAILTALRLCAYCCNIVNVSLVKPSFYVYS
RVKNLNSSRVPDLLV
>QNO67165.1 |envelope protein [Severe acute respiratory syndrome coronavirus 2]
MYSFVSEETGTLIVNSVLLFLAFVVFLLVTLAILTALRLCAYCCNIVNVSLVKPSFYVYS
RVKNLNSSRVPDLLV
>QNO67177.1 |envelope protein [Severe acute respiratory syndrome coronavirus 2]
MYSFVSEETGTLIVNSVLLFLAFVVFLLVTLAILTALRLCAYCCNIVNVSLVKPSFYVYS
RVKNLNSSRVPDLLV
>QNO67189.1 |envelope protein [Severe acute respiratory syndrome coronavirus 2]
MYSFVSEETGTLIVNSVLLFLAFVVFLLVTLAILTALRLCAYCCNIVNVSLVKPSFYVYS
RVKNLNSSRVPDLLV
>QNO67201.1 |envelope protein [Severe acute respiratory syndrome coronavirus 2]
MYSFVSEETGTLIVNSVLLFLAFVVFLLVTLAILTALRLCAYCCNIVNVSLVKPSFYVYS
RVKNLNSSRVPDLLV
>QNO67213.1 |envelope protein [Severe acute respiratory syndrome coronavirus 2]
MYSFVSEETGTLIVNSVLLFLAFVVFLLVTLAILTALRLCAYCCNIVNVSLVKPSFYVYS
RVKNLNSSRVPDLLV
>QNO67225.1 |envelope protein [Severe acute respiratory syndrome coronavirus 2]
MYSFVSEETGTLIVNSVLLFLAFVVFLLVTLAILTALRLCAYCCNIVNVSLVKPSFYVYS
RVKNLNSSRVPDLLV
>QNO67237.1 |envelope protein [Severe acute respiratory syndrome coronavirus 2]
MYSFVSEETGTLIVNSVLLFLAFVVFLLVTLAILTALRLCAYCCNIVNVSLVKPSFYVYS
RVKNLNSSRVPDLLV
>QNO67249.1 |envelope protein [Severe acute respiratory syndrome coronavirus 2]
MYSFVSEETGTLIVNSVLLFLAFVVFLLVTLAILTALRLCAYCCNIVNVSLVKPSFYVYS
RVKNLNSSRVPDLLV
>QNO67261.1 |envelope protein [Severe acute respiratory syndrome coronavirus 2]
MYSFVSEETGTLIVNSVLLFLAFVVFLLVTLAILTALRLCAYCCNIVNVSLVKPSFYVYS
RVKNLNSSRVPDLLV
>QNO67273.1 |envelope protein [Severe acute respiratory syndrome coronavirus 2]
MYSFVSEETGTLIVNSVLLFLAFVVFLLVTLAILTALRLCAYCCNIVNVSLVKPSFYVYS
RVKNLNSSRVPDLLV
>QNO67285.1 |envelope protein [Severe acute respiratory syndrome coronavirus 2]
MYSFVSEETGTLIVNSVLLFLAFVVFLLVTLAILTALRLCAYCCNIVNVSLVKPSFYVYS
RVKNLNSSRVPDLLV
>QNO67321.1 |envelope protein [Severe acute respiratory syndrome coronavirus 2]
MYSFVSEETGTLIVNSVLLFLAFVVFLLVTLAILTALRLCAYCCNIVNVSLVKPSFYVYS
RVKNLNSSRVPDLLV
>QNO67333.1 |envelope protein [Severe acute respiratory syndrome coronavirus 2]
MYSFVSEETGTLIVNSVLLFLAFVVFLLVTLAILTALRLCAYCCNIVNVSLVKPSFYVYS
RVKNLNSSRVPDLLV
>QNO67345.1 |envelope protein [Severe acute respiratory syndrome coronavirus 2]
MYSFVSEETGTLIVNSVLLFLAFVVFLLVTLAILTALRLCAYCCNIVNVSLVKPSFYVYS
RVKNLNSSRVPDLLV
>QNO67357.1 |envelope protein [Severe acute respiratory syndrome coronavirus 2]
MYSFVSEETGTLIVNSVLLFLAFVVFLLVTLAILTALRLCAYCCNIVNVSLVKPSFYVYS
RVKNLNSSRVPDLLV
>QNO67381.1 |envelope protein [Severe acute respiratory syndrome coronavirus 2]
MYSFVSEETGTLIVNSVLLFLAFVVFLLVTLAILTALRLCAYCCNIVNVSLVKPSFYVYS
RVKNLNSSRVPDLLV
>QNO67405.1 |envelope protein [Severe acute respiratory syndrome coronavirus 2]
MYSFVSEETGTLIVNSVLLFLAFVVFLLVTLAILTALRLCAYCCNIVNVSLVKPSFYVYS
RVKNLNSSRVPDLLV
>QNO67417.1 |envelope protein [Severe acute respiratory syndrome coronavirus 2]
MYSFVSEETGTLIVNSVLLFLAFVVFLLVTLAILTALRLCAYCCNIVNVSLVKPSFYVYS
RVKNLNSSRVPDLLV
>QNO67429.1 |envelope protein [Severe acute respiratory syndrome coronavirus 2]
MYSFVSEETGTLIVNSVLLFLAFVVFLLVTLAILTALRLCAYCCNIVNVSLVKPSFYVYS
RVKNLNSSRVPDLLV
>QNO67441.1 |envelope protein [Severe acute respiratory syndrome coronavirus 2]
MYSFVSEETGTLIVNSVLLFLAFVVFLLVTLAILTALRLCAYCCNIVNVSLVKPSFYVYS
RVKNLNSSRVPDLLV
>QNO67453.1 |envelope protein [Severe acute respiratory syndrome coronavirus 2]
MYSFVSEETGTLIVNSVLLFLAFVVFLLVTLAILTALRLCAYCCNIVNVSLVKPSFYVYS
RVKNLNSSRVPDLLV
>QNO67465.1 |envelope protein [Severe acute respiratory syndrome coronavirus 2]
MYSFVSEETGTLIVNSVLLFLAFVVFLLVTLAILTALRLCAYCCNIVNVSLVKPSFYVYS
RVKNLNSSRVPDLLV
>QNO67477.1 |envelope protein [Severe acute respiratory syndrome coronavirus 2]
MYSFVSEETGTLIVNSVLLFLAFVVFLLVTLAILTALRLCAYCCNIVNVSLVKPSFYVYS
RVKNLNSSRVPDLLV
>QNO67489.1 |envelope protein [Severe acute respiratory syndrome coronavirus 2]
MYSFVSEETGTLIVNSVLLFLAFVVFLLVTLAILTALRLCAYCCNIVNVSLVKPSFYVYS
RVKNLNSSRVPDLLV
>QNO67501.1 |envelope protein [Severe acute respiratory syndrome coronavirus 2]
MYSFVSEETGTLIVNSVLLFLAFVVFLLVTLAILTALRLCAYCCNIVNVSLVKPSFYVYS
RVKNLNSSRVPDLLV
>QNO67513.1 |envelope protein [Severe acute respiratory syndrome coronavirus 2]
MYSFVSEETGTLIVNSVLLFLAFVVFLLVTLAILTALRLCAYCCNIVNVSLVKPSFYVYS
RVKNLNSSRVPDLLV
>QNO67525.1 |envelope protein [Severe acute respiratory syndrome coronavirus 2]
MYSFVSEETGTLIVNSVLLFLAFVVFLLVTLAILTALRLCAYCCNIVNVSLVKPSFYVYS
RVKNLNSSRVPDLLV
>QNO67537.1 |envelope protein [Severe acute respiratory syndrome coronavirus 2]
MYSFVSEETGTLIVNSVLLFLAFVVFLLVTLAILTALRLCAYCCNIVNVSLVKPSFYVYS
RVKNLNSSRVPDLLV
>QNO67549.1 |envelope protein [Severe acute respiratory syndrome coronavirus 2]
MYSFVSEETGTLIVNSVLLFLAFVVFLLVTLAILTALRLCAYCCNIVNVSLVKPSFYVYS
RVKNLNSSRVPDLLV
>QNO67561.1 |envelope protein [Severe acute respiratory syndrome coronavirus 2]
MYSFVSEETGTLIVNSVLLFLAFVVFLLVTLAILTALRLCAYCCNIVNVSLVKPSFYVYS
RVKNLNSSRVPDLLV
>QNO67585.1 |envelope protein [Severe acute respiratory syndrome coronavirus 2]
MYSFVSEETGTLIVNSVLLFLAFVVFLLVTLAILTALRLCAYCCNIVNVSLVKPSFYVYS
RVKNLNSSRVPDLLV
>QNO67597.1 |envelope protein [Severe acute respiratory syndrome coronavirus 2]
MYSFVSEETGTLIVNSVLLFLAFVVFLLVTLAILTALRLCAYCCNIVNVSLVKPSFYVYS
RVKNLNSSRVPDLLV
>QNO67609.1 |envelope protein [Severe acute respiratory syndrome coronavirus 2]
MYSFVSEETGTLIVNSVLLFLAFVVFLLVTLAILTALRLCAYCCNIVNVSLVKPSFYVYS
RVKNLNSSRVPDLLV
>QNO67621.1 |envelope protein [Severe acute respiratory syndrome coronavirus 2]
MYSFVSEETGTLIVNSVLLFLAFVVFLLVTLAILTALRLCAYCCNIVNVSLVKPSFYVYS
RVKNLNSSRVPDLLV
>QNO67645.1 |envelope protein [Severe acute respiratory syndrome coronavirus 2]
MYSFVSEETGTLIVNSVLLFLAFVVFLLVTLAILTALRLCAYCCNIVNVSLVKPSFYVYS
RVKNLNSSRVPDLLV
>QNO67669.1 |envelope protein [Severe acute respiratory syndrome coronavirus 2]
MYSFVSEETGTLIVNSVLLFLAFVVFLLVTLAILTALRLCAYCCNIVNVSLVKPSFYVYS
RVKNLNSSRVPDLLV
>QNO67681.1 |envelope protein [Severe acute respiratory syndrome coronavirus 2]
MYSFVSEETGTLIVNSVLLFLAFVVFLLVTLAILTALRLCAYCCNIVNVSLVKPSFYVYS
RVKNLNSSRVPDLLV
>QNO67717.1 |envelope protein [Severe acute respiratory syndrome coronavirus 2]
MYSFVSEETGTLIVNSVLLFLAFVVFLLVTLAILTALRLCAYCCNIVNVSLVKPSFYVYS
RVKNLNSSRVPDLLV
>QNO67729.1 |envelope protein [Severe acute respiratory syndrome coronavirus 2]
MYSFVSEETGTLIVNSVLLFLAFVVFLLVTLAILTALRLCAYCCNIVNVSLVKPSFYVYS
RVKNLNSSRVPDLLV
>QNO67741.1 |envelope protein [Severe acute respiratory syndrome coronavirus 2]
MYSFVSEETGTLIVNSVLLFLAFVVFLLVTLAILTALRLCAYCCNIVNVSLVKPSFYVYS
RVKNLNSSRVPDLLV
>QNO67753.1 |envelope protein [Severe acute respiratory syndrome coronavirus 2]
MYSFVSEETGTLIVNSVLLFLAFVVFLLVTLAILTALRLCAYCCNIVNVSLVKPSFYVYS
RVKNLNSSRVPDLLV
>QNO67765.1 |envelope protein [Severe acute respiratory syndrome coronavirus 2]
MYSFVSEETGTLIVNSVLLFLAFVVFLLVTLAILTALRLCAYCCNIVNVSLVKPSFYVYS
RVKNLNSSRVPDLLV
>QNO67777.1 |envelope protein [Severe acute respiratory syndrome coronavirus 2]
MYSFVSEETGTLIVNSVLLFLAFVVFLLVTLAILTALRLCAYCCNIVNVSLVKPSFYVYS
RVKNLNSSRVPDLLV
>QNO67789.1 |envelope protein [Severe acute respiratory syndrome coronavirus 2]
MYSFVSEETGTLIVNSVLLFLAFVVFLLVTLAILTALRLCAYCCNIVNVSLVKPSFYVYS
RVKNLNSSRVPDLLV
>QNO67801.1 |envelope protein [Severe acute respiratory syndrome coronavirus 2]
MYSFVSEETGTLIVNSVLLFLAFVVFLLVTLAILTALRLCAYCCNIVNVSLVKPSFYVYS
RVKNLNSSRVPDLLV
>QNO67813.1 |envelope protein [Severe acute respiratory syndrome coronavirus 2]
MYSFVSEETGTLIVNSVLLFLAFVVFLLVTLAILTALRLCAYCCNIVNVSLVKPSFYVYS
RVKNLNSSRVPDLLV
>QNO67825.1 |envelope protein [Severe acute respiratory syndrome coronavirus 2]
MYSFVSEETGTLIVNSVLLFLAFVVFLLVTLAILTALRLCAYCCNIVNVSLVKPSFYVYS
RVKNLNSSRVPDLLV
>QNO67849.1 |envelope protein [Severe acute respiratory syndrome coronavirus 2]
MYSFVSEETGTLIVNSVLLFLAFVVFLLVTLAILTALRLCAYCCNIVNVSLVKPSFYVYS
RVKNLNSSRVPDLLV
>QNO67873.1 |envelope protein [Severe acute respiratory syndrome coronavirus 2]
MYSFVSEETGTLIVNSVLLFLAFVVFLLVTLAILTALRLCAYCCNIVNVSLVKPSFYVYS
RVKNLNSSRVPDLLV
>QNO67885.1 |envelope protein [Severe acute respiratory syndrome coronavirus 2]
MYSFVSEETGTLIVNSVLLFLAFVVFLLVTLAILTALRLCAYCCNIVNVSLVKPSFYVYS
RVKNLNSSRVPDLLV
>QNO67897.1 |envelope protein [Severe acute respiratory syndrome coronavirus 2]
MYSFVSEETGTLIVNSVLLFLAFVVFLLVTLAILTALRLCAYCCNIVNVSLVKPSFYVYS
RVKNLNSSRVPDLLV
>QNO67933.1 |envelope protein [Severe acute respiratory syndrome coronavirus 2]
MYSFVSEETGTLIVNSVLLFLAFVVFLLVTLAILTALRLCAYCCNIVNVSLVKPSFYVYS
RVKNLNSSRVPDLLV
>QNO67945.1 |envelope protein [Severe acute respiratory syndrome coronavirus 2]
MYSFVSEETGTLIVNSVLLFLAFVVFLLVTLAILTALRLCAYCCNIVNVSLVKPSFYVYS
RVKNLNSSRVPDLLV
>QNO67957.1 |envelope protein [Severe acute respiratory syndrome coronavirus 2]
MYSFVSEETGTLIVNSVLLFLAFVVFLLVTLAILTALRLCAYCCNIVNVSLVKPSFYVYS
RVKNLNSSRVPDLLV
>QNO67969.1 |envelope protein [Severe acute respiratory syndrome coronavirus 2]
MYSFVSEETGTLIVNSVLLFLAFVVFLLVTLAILTALRLCAYCCNIVNVSLVKPSFYVYS
RVKNLNSSRVPDLLV
>QNO67981.1 |envelope protein [Severe acute respiratory syndrome coronavirus 2]
MYSFVSEETGTLIVNSVLLFLAFVVFLLVTLAILTALRLCAYCCNIVNVSLVKPSFYVYS
RVKNLNSSRVPDLLV
>QNO68005.1 |envelope protein [Severe acute respiratory syndrome coronavirus 2]
MYSFVSEETGTLIVNSVLLFLAFVVFLLVTLAILTALRLCAYCCNIVNVSLVKPSFYVYS
RVKNLNSSRVPDLLV
>QNO68029.1 |envelope protein [Severe acute respiratory syndrome coronavirus 2]
MYSFVSEETGTLIVNSVLLFLAFVVFLLVTLAILTALRLCAYCCNIVNVSLVKPSFYVYS
RVKNLNSSRVPDLLV
>QNO68041.1 |envelope protein [Severe acute respiratory syndrome coronavirus 2]
MYSFVSEETGTLIVNSVLLFLAFVVFLLVTLAILTALRLCAYCCNIVNVSLVKPSFYVYS
RVKNLNSSRVPDLLV
>QNO68053.1 |envelope protein [Severe acute respiratory syndrome coronavirus 2]
MYSFVSEETGTLIVNSVLLFLAFVVFLLVTLAILTALRLCAYCCNIVNVSLVKPSFYVYS
RVKNLNSSRVPDLLV
>QNO68065.1 |envelope protein [Severe acute respiratory syndrome coronavirus 2]
MYSFVSEETGTLIVNSVLLFLAFVVFLLVTLAILTALRLCAYCCNIVNVSLVKPSFYVYS
RVKNLNSSRVPDLLV
>QNO68089.1 |envelope protein [Severe acute respiratory syndrome coronavirus 2]
MYSFVSEETGTLIVNSVLLFLAFVVFLLVTLAILTALRLCAYCCNIVNVSLVKPSFYVYS
RVKNLNSSRVPDLLV
>QNO68101.1 |envelope protein [Severe acute respiratory syndrome coronavirus 2]
MYSFVSEETGTLIVNSVLLFLAFVVFLLVTLAILTALRLCAYCCNIVNVSLVKPSFYVYS
RVKNLNSSRVPDLLV
>QNO68125.1 |envelope protein [Severe acute respiratory syndrome coronavirus 2]
MYSFVSEETGTLIVNSVLLFLAFVVFLLVTLAILTALRLCAYCCNIVNVSLVKPSFYVYS
RVKNLNSSRVPDLLV
>QNO68137.1 |envelope protein [Severe acute respiratory syndrome coronavirus 2]
MYSFVSEETGTLIVNSVLLFLAFVVFLLVTLAILTALRLCAYCCNIVNVSLVKPSFYVYS
RVKNLNSSRVPDLLV
>QNO68149.1 |envelope protein [Severe acute respiratory syndrome coronavirus 2]
MYSFVSEETGTLIVNSVLLFLAFVVFLLVTLAILTALRLCAYCCNIVNVSLVKPSFYVYS
RVKNLNSSRVPDLLV
>QNO68173.1 |envelope protein [Severe acute respiratory syndrome coronavirus 2]
MYSFVSEETGTLIVNSVLLFLAFVVFLLVTLAILTALRLCAYCCNIVNVSLVKPSFYVYS
RVKNLNSSRVPDLLV
>QNO68185.1 |envelope protein [Severe acute respiratory syndrome coronavirus 2]
MYSFVSEETGTLIVNSVLLFLAFVVFLLVTLAILTALRLCAYCCNIVNVSLVKPSFYVYS
RVKNLNSSRVPDLLV
>QNO68209.1 |envelope protein [Severe acute respiratory syndrome coronavirus 2]
MYSFVSEETGTLIVNSVLLFLAFVVFLLVTLAILTALRLCAYCCNIVNVSLVKPSFYVYS
RVKNLNSSRVPDLLV
>QNO68221.1 |envelope protein [Severe acute respiratory syndrome coronavirus 2]
MYSFVSEETGTLIVNSVLLFLAFVVFLLVTLAILTALRLCAYCCNIVNVSLVKPSFYVYS
RVKNLNSSRVPDLLV
>QNO68233.1 |envelope protein [Severe acute respiratory syndrome coronavirus 2]
MYSFVSEETGTLIVNSVLLFLAFVVFLLVTLAILTALRLCAYCCNIVNVSLVKPSFYVYS
RVKNLNSSRVPDLLV
>QNO68245.1 |envelope protein [Severe acute respiratory syndrome coronavirus 2]
MYSFVSEETGTLIVNSVLLFLAFVVFLLVTLAILTALRLCAYCCNIVNVSLVKPSFYVYS
RVKNLNSSRVPDLLV
>QNO68257.1 |envelope protein [Severe acute respiratory syndrome coronavirus 2]
MYSFVSEETGTLIVNSVLLFLAFVVFLLVTLAILTALRLCAYCCNIVNVSLVKPSFYVYS
RVKNLNSSRVPDLLV
>QNO68269.1 |envelope protein [Severe acute respiratory syndrome coronavirus 2]
MYSFVSEETGTLIVNSVLLFLAFVVFLLVTLAILTALRLCAYCCNIVNVSLVKPSFYVYS
RVKNLNSSRVPDLLV
>QNO68281.1 |envelope protein [Severe acute respiratory syndrome coronavirus 2]
MYSFVSEETGTLIVNSVLLFLAFVVFLLVTLAILTALRLCAYCCNIVNVSLVKPSFYVYS
RVKNLNSSRVPDLLV
>QNO68293.1 |envelope protein [Severe acute respiratory syndrome coronavirus 2]
MYSFVSEETGTLIVNSVLLFLAFVVFLLVTLAILTALRLCAYCCNIVNVSLVKPSFYVYS
RVKNLNSSRVPDLLV
>QNO68305.1 |envelope protein [Severe acute respiratory syndrome coronavirus 2]
MYSFVSEETGTLIVNSVLLFLAFVVFLLVTLAILTALRLCAYCCNIVNVSLVKPSFYVYS
RVKNLNSSRVPDLLV
>QNO68317.1 |envelope protein [Severe acute respiratory syndrome coronavirus 2]
MYSFVSEETGTLIVNSVLLFLAFVVFLLVTLAILTALRLCAYCCNIVNVSLVKPSFYVYS
RVKNLNSSRVPDLLV
>QNO68329.1 |envelope protein [Severe acute respiratory syndrome coronavirus 2]
MYSFVSEETGTLIVNSVLLFLAFVVFLLVTLAILTALRLCAYCCNIVNVSLVKPSFYVYS
RVKNLNSSRVPDLLV
>QNO68341.1 |envelope protein [Severe acute respiratory syndrome coronavirus 2]
MYSFVSEETGTLIVNSVLLFFAFVVFLLVTLAILTALRLCAYCCNIVNVSLVKPSFYVYS
RVKNLNSSRVPDLLV
>QNO68365.1 |envelope protein [Severe acute respiratory syndrome coronavirus 2]
MYSFVSEETGTLIVNSVLLFLAFVVFLLVTLAILTALRLCAYCCNIVNVSLVKPSFYVYS
RVKNLNSSRVPDLLV
>QNO68377.1 |envelope protein [Severe acute respiratory syndrome coronavirus 2]
MYSFVSEETGTLIVNSVLLFLAFVVFLLVTLAILTALRLCAYCCNIVNVSLVKPSFYVYS
RVKNLNSSRVPDLLV
>QNO68389.1 |envelope protein [Severe acute respiratory syndrome coronavirus 2]
MYSFVSEETGTLIVNSVLLFLAFVVFLLVTLAILTALRLCAYCCNIVNVSLVKPSFYVYS
RVKNLNSSRVPDLLV
>QNO68401.1 |envelope protein [Severe acute respiratory syndrome coronavirus 2]
MYSFVSEETGTLIVNSVLLFLAFVVFLLVTLAILTALRLCAYCCNIVNVSLVKPSFYVYS
RVKNLNSSRVPDLLV
>QNO68413.1 |envelope protein [Severe acute respiratory syndrome coronavirus 2]
MYSFVSEETGTLIVNSVLLFLAFVVFLLVTLAILTALRLCAYCCNIVNVSLVKPSFYVYS
RVKNLNSSRVPDLLV
>QNO68425.1 |envelope protein [Severe acute respiratory syndrome coronavirus 2]
MYSFVSEETGTLIVNSVLLFLAFVVFLLVTLAILTALRLCAYCCNIVNVSLVKPSFYVYS
RVKNLNSSRVPDLLV
>QNO68437.1 |envelope protein [Severe acute respiratory syndrome coronavirus 2]
MYSFVSEETGTLIVNSVLLFLAFVVFLLVTLAILTALRLCAYCCNIVNVSLVKPSFYVYS
RVKNLNSSRVPDLLV
>QNO68449.1 |envelope protein [Severe acute respiratory syndrome coronavirus 2]
MYSFVSEETGTLIVNSVLLFLAFVVFLLVTLAILTALRLCAYCCNIVNVSLVKPSFYVYS
RVKNLNSSRVPDLLV
>QNO68461.1 |envelope protein [Severe acute respiratory syndrome coronavirus 2]
MYSFVSEETGTLIVNSVLLFLAFVVFLLVTLAILTALRLCAYCCNIVNVSLVKPSFYVYS
RVKNLNSSRVPDLLV
>QNO68473.1 |envelope protein [Severe acute respiratory syndrome coronavirus 2]
MYSFVSEETGTLIVNSVLLFLAFVVFLLVTLAILTALRLCAYCCNIVNVSLVKPSFYVYS
RVKNLNSSRVPDLLV
>QNO68485.1 |envelope protein [Severe acute respiratory syndrome coronavirus 2]
MYSFVSEETGTLIVNSVLLFLAFVVFLLVTLAILTALRLCAYCCNIVNVSLVKPSFYVYS
RVKNLNSSRVPDLLV
>QNO68497.1 |envelope protein [Severe acute respiratory syndrome coronavirus 2]
MYSFVSEETGTLIVNSVLLFLAFVVFLLVTLAILTALRLCAYCCNIVNVSLVKPSFYVYS
RVKNLNSSRVPDLLV
>QNO68509.1 |envelope protein [Severe acute respiratory syndrome coronavirus 2]
MYSFVSEETGTLIVNSVLLFLAFVVFLLVTLAILTALRLCAYCCNIVNVSLVKPSFYVYS
RVKNLNSSRVPDLLV
>QNO68521.1 |envelope protein [Severe acute respiratory syndrome coronavirus 2]
MYSFVSEETGTLIVNSVLLFLAFVVFLLVTLAILTALRLCAYCCNIVNVSLVKPSFYVYS
RVKNLNSSRVPDLLV
>QNO68533.1 |envelope protein [Severe acute respiratory syndrome coronavirus 2]
MYSFVSEETGTLIVNSVLLFLAFVVFLLVTLAILTALRLCAYCCNIVNVSLVKPSFYVYS
RVKNLNSSRVPDLLV
>QNO68545.1 |envelope protein [Severe acute respiratory syndrome coronavirus 2]
MYSFVSEETGTLIVNSVLLFLAFVVFLLVTLAILTALRLCAYCCNIVNVSLVKPSFYVYS
RVKNLNSSRVPDLLV
>QNO68557.1 |envelope protein [Severe acute respiratory syndrome coronavirus 2]
MYSFVSEETGTLIVNSVLLFLAFVVFLLVTLAILTALRLCAYCCNIVNVSLVKPSFYVYS
RVKNLNSSRVPDLLV
>QNO68569.1 |envelope protein [Severe acute respiratory syndrome coronavirus 2]
MYSFVSEETGTLIVNSVLLFLAFVVFLLVTLAILTALRLCAYCCNIVNVSLVKPSFYVYS
RVKNLNSSRVPDLLV
>QNO68581.1 |envelope protein [Severe acute respiratory syndrome coronavirus 2]
MYSFVSEETGTLIVNSVLLFLAFVVFLLVTLAILTALRLCAYCCNIVNVSLVKPSFYVYS
RVKNLNSSRVPDLLV
>QNO68593.1 |envelope protein [Severe acute respiratory syndrome coronavirus 2]
MYSFVSEETGTLIVNSVLLFLAFVVFLLVTLAILTALRLCAYCCNIVNVSLVKPSFYVYS
RVKNLNSSRVPDLLV
>QNO68605.1 |envelope protein [Severe acute respiratory syndrome coronavirus 2]
MYSFVSEETGTLIVNSVLLFLAFVVFLLVTLAILTALRLCAYCCNIVNVSLVKPSFYVYS
RVKNLNSSRVPDLLV
>QNO68617.1 |envelope protein [Severe acute respiratory syndrome coronavirus 2]
MYSFVSEETGTLIVNSVLLFLAFVVFLLVTLAILTALRLCAYCCNIVNVSLVKPSFYVYS
RVKNLNSSRVPDLLV
>QNO68629.1 |envelope protein [Severe acute respiratory syndrome coronavirus 2]
MYSFVSEETGTLIVNSVLLFLAFVVFLLVTLAILTALRLCAYCCNIVNVSLVKPSFYVYS
RVKNLNSSRVPDLLV
>QNO68641.1 |envelope protein [Severe acute respiratory syndrome coronavirus 2]
MYSFVSEETGTLIVNSVLLFLAFVVFLLVTLAILTALRLCAYCCNIVNVSLVKPSFYVYS
RVKNLNSSRVPDLLV
>QNO68653.1 |envelope protein [Severe acute respiratory syndrome coronavirus 2]
MYSFVSEETGTLIVNSVLLFLAFVVFLLVTLAILTALRLCAYCCNIVNVSLVKPSFYVYS
RVKNLNSSRVPDLLV
>QNO68665.1 |envelope protein [Severe acute respiratory syndrome coronavirus 2]
MYSFVSEETGTLIVNSVLLFLAFVVFLLVTLAILTALRLCAYCCNIVNVSLVKPSFYVYS
RVKNLNSSRVPDLLV
>QNO68677.1 |envelope protein [Severe acute respiratory syndrome coronavirus 2]
MYSFVSEETGTLIVNSVLLFLAFVVFLLVTLAILTALRLCAYCCNIVNVSLVKPSFYVYS
RVKNLNSSRVPDLLV
>QNO68689.1 |envelope protein [Severe acute respiratory syndrome coronavirus 2]
MYSFVSEETGTLIVNSVLLFLAFVVFLLVTLAILTALRLCAYCCNIVNVSLVKPSFYVYS
RVKNLNSSRVPDLLV
>QNO68701.1 |envelope protein [Severe acute respiratory syndrome coronavirus 2]
MYSFVSEETGTLIVNSVLLFLAFVVFLLVTLAILTALRLCAYCCNIVNVSLVKPSFYVYS
RVKNLNSSRVPDLLV
>QNO68713.1 |envelope protein [Severe acute respiratory syndrome coronavirus 2]
MYSFVSEETGTLIVNSVLLFLAFVVFLLVTLAILTALRLCAYCCNIVNVSLVKPSFYVYS
RVKNLNSSRVPDLLV
>QNO68725.1 |envelope protein [Severe acute respiratory syndrome coronavirus 2]
MYSFVSEETGTLIVNSVLLFLAFVVFLLVTLAILTALRLCAYCCNIVNVSLVKPSFYVYS
RVKNLNSSRVPDLLV
>QNO68737.1 |envelope protein [Severe acute respiratory syndrome coronavirus 2]
MYSFVSEETGTLIVNSVLLFLAFVVFLLVTLAILTALRLCAYCCNIVNVSLVKPSFYVYS
RVKNLNSSRVPDLLV
>QNO68749.1 |envelope protein [Severe acute respiratory syndrome coronavirus 2]
MYSFVSEETGTLIVNSVLLFLAFVVFLLVTLAILTALRLCAYCCNIVNVSLVKPSFYVYS
RVKNLNSSRVPDLLV
>QNO68761.1 |envelope protein [Severe acute respiratory syndrome coronavirus 2]
MYSFVSEETGTLIVNSVLLFLAFVVFLLVTLAILTALRLCAYCCNIVNVSLVKPSFYVYS
RVKNLNSSRVPDLLV
>QNO68773.1 |envelope protein [Severe acute respiratory syndrome coronavirus 2]
MYSFVSEETGTLIVNSVLLFLAFVVFLLVTLAILTALRLCAYCCNIVNVSLVKPSFYVYS
RVKNLNSSRVPDLLV
>QNO68785.1 |envelope protein [Severe acute respiratory syndrome coronavirus 2]
MYSFVSEETGTLIVNSVLLFLAFVVFLLVTLAILTALRLCAYCCNIVNVSLVKPSFYVYS
RVKNLNSSRVPDLLV
>QNO68797.1 |envelope protein [Severe acute respiratory syndrome coronavirus 2]
MYSFVSEETGTLIVNSVLLFLAFVVFLLVTLAILTALRLCAYCCNIVNVSLVKPSFYVYS
RVKNLNSSRVPDLLV
>QNO68809.1 |envelope protein [Severe acute respiratory syndrome coronavirus 2]
MYSFVSEETGTLIVNSVLLFLAFVVFLLVTLAILTALRLCAYCCNIVNVSLVKPSFYVYS
RVKNLNSSRVPDLLV
>QNO68821.1 |envelope protein [Severe acute respiratory syndrome coronavirus 2]
MYSFVSEETGTLIVNSVLLFLAFVVFLLVTLAILTALRLCAYCCNIVNVSLVKPSFYVYS
RVKNLNSSRVPDLLV
>QNO68833.1 |envelope protein [Severe acute respiratory syndrome coronavirus 2]
MYSFVSEETGTLIVNSVLLFLAFVVFLLVTLAILTALRLCAYCCNIVNVSLVKPSFYVYS
RVKNLNSSRVPDLLV
>QNO68845.1 |envelope protein [Severe acute respiratory syndrome coronavirus 2]
MYSFVSEETGTLIVNSVLLFLAFVVFLLVTLAILTALRLCAYCCNIVNVSLVKPSFYVYS
RVKNLNSSRVPDLLV
>QNO68857.1 |envelope protein [Severe acute respiratory syndrome coronavirus 2]
MYSFVSEETGTLIVNSVLLFLAFVVFLLVTLAILTALRLCAYCCNIVNVSLVKPSFYVYS
RVKNLNSSRVPDLLV
>QNO68869.1 |envelope protein [Severe acute respiratory syndrome coronavirus 2]
MYSFVSEETGTLIVNSVLLFLAFVVFLLVTLAILTALRLCAYCCNIVNVSLVKPSFYVYS
RVKNLNSSRVPDLLV
>QNO68881.1 |envelope protein [Severe acute respiratory syndrome coronavirus 2]
MYSFVSEETGTLIVNSVLLFLAFVVFLLVTLAILTALRLCAYCCNIVNVSLVKPSFYVYS
RVKNLNSSRVPDLLV
>QNO68893.1 |envelope protein [Severe acute respiratory syndrome coronavirus 2]
MYSFVSEETGTLIVNSVLLFLAFVVFLLVTLAILTALRLCAYCCNIVNVSLVKPSFYVYS
RVKNLNSSRVPDLLV
>QNO68905.1 |envelope protein [Severe acute respiratory syndrome coronavirus 2]
MYSFVSEETGTLIVNSVLLFLAFVVFLLVTLAILTALRLCAYCCNIVNVSLVKPSFYVYS
RVKNLNSSRVPDLLV
>QNO68917.1 |envelope protein [Severe acute respiratory syndrome coronavirus 2]
MYSFVSEETGTLIVNSVLLFLAFVVFLLVTLAILTALRLCAYCCNIVNVSLVKPSFYVYS
RVKNLNSSRVPDLLV
>QNO68929.1 |envelope protein [Severe acute respiratory syndrome coronavirus 2]
MYSFVSEETGTLIVNSVLLFLAFVVFLLVTLAILTALRLCAYCCNIVNVSLVKPSFYVYS
RVKNLNSSRVPDLLV
>QNO68941.1 |envelope protein [Severe acute respiratory syndrome coronavirus 2]
MYSFVSEETGTLIVNSVLLFLAFVVFLLVTLAILTALRLCAYCCNIVNVSLVKPSFYVYS
RVKNLNSSRVPDLLV
>QNO68953.1 |envelope protein [Severe acute respiratory syndrome coronavirus 2]
MYSFVSEETGTLIVNSVLLFLAFVVFLLVTLAILTALRLCAYCCNIVNVSLVKPSFYVYS
RVKNLNSSRVPDLLV
>QNO68965.1 |envelope protein [Severe acute respiratory syndrome coronavirus 2]
MYSFVSEETGTLIVNSVLLFLAFVVFLLVTLAILTALRLCAYCCNIVNVSLVKPSFYVYS
RVKNLNSSRVPDLLV
>QNO68977.1 |envelope protein [Severe acute respiratory syndrome coronavirus 2]
MYSFVSEETGTLIVNSVLLFLAFVVFLLVTLAILTALRLCAYCCNIVNVSLVKPSFYVYS
RVKNLNSSRVPDLLV
>QNO68989.1 |envelope protein [Severe acute respiratory syndrome coronavirus 2]
MYSFVSEETGTLIVNSVLLFLAFVVFLLVTLAILTALRLCAYCCNIVNVSLVKPSFYVYS
RVKNLNSSRVPDLLV
>QNO69001.1 |envelope protein [Severe acute respiratory syndrome coronavirus 2]
MYSFVSEETGTLIVNSVLLFLAFVVFLLVTLAILTALRLCAYCCNIVNVSLVKPSFYVYS
RVKNLNSSRVPDLLV
>QNO69013.1 |envelope protein [Severe acute respiratory syndrome coronavirus 2]
MYSFVSEETGTLIVNSVLLFLAFVVFLLVTLAILTALRLCAYCCNIVNVSLVKPSFYVYS
RVKNLNSSRVPDLLV
>QNO69025.1 |envelope protein [Severe acute respiratory syndrome coronavirus 2]
MYSFVSEETGTLIVNSVLLFLAFVVFLLVTLAILTALRLCAYCCNIVNVSLVKPSFYVYS
RVKNLNSSRVPDLLV
>QNO69037.1 |envelope protein [Severe acute respiratory syndrome coronavirus 2]
MYSFVSEETGTLIVNSVLLFLAFVVFLLVTLAILTALRLCAYCCNIVNVSLVKPSFYVYS
RVKNLNSSRVPDLLV
>QNO69049.1 |envelope protein [Severe acute respiratory syndrome coronavirus 2]
MYSFVSEETGTLIVNSVLLFLAFVVFLLVTLAILTALRLCAYCCNIVNVSLVKPSFYVYS
RVKNLNSSRVPDLLV
>QNO69061.1 |envelope protein [Severe acute respiratory syndrome coronavirus 2]
MYSFVSEETGTLIVNSVLLFLAFVVFLLVTLAILTALRLCAYCCNIVNVSLVKPSFYVYS
RVKNLNSSRVPDLLV
>QNO69073.1 |envelope protein [Severe acute respiratory syndrome coronavirus 2]
MYSFVSEETGTLIVNSVLLFLAFVVFLLVTLAILTALRLCAYCCNIVNVSLVKPSFYVYS
RVKNLNSSRVPDLLV
>QNO69085.1 |envelope protein [Severe acute respiratory syndrome coronavirus 2]
MYSFVSEETGTLIVNSVLLFLAFVVFLLVTLAILTALRLCAYCCNIVNVSLVKPSFYVYS
RVKNLNSSRVPDLLV
>QNO69097.1 |envelope protein [Severe acute respiratory syndrome coronavirus 2]
MYSFVSEETGTLIVNSVLLFLAFVVFLLVTLAILTALRLCAYCCNIVNVSLVKPSFYVYS
RVKNLNSSRVPDLLV
>QNO69109.1 |envelope protein [Severe acute respiratory syndrome coronavirus 2]
MYSFVSEETGTLIVNSVLLFLAFVVFLLVTLAILTALRLCAYCCNIVNVSLVKPSFYVYS
RVKNLNSSRVPDLLV
>QNO69121.1 |envelope protein [Severe acute respiratory syndrome coronavirus 2]
MYSFVSEETGTLIVNSVLLFLAFVVFLLVTLAILTALRLCAYCCNIVNVSLVKPSFYVYS
RVKNLNSSRVPDLLV
>QNO69133.1 |envelope protein [Severe acute respiratory syndrome coronavirus 2]
MYSFVSEETGTLIVNSVLLFLAFVVFLLVTLAILTALRLCAYCCNIVNVSLVKPSFYVYS
RVKNLNSSRVPDLLV
>QNO69145.1 |envelope protein [Severe acute respiratory syndrome coronavirus 2]
MYSFVSEETGTLIVNSVLLFLAFVVFLLVTLAILTALRLCAYCCNIVNVSLVKPSFYVYS
RVKNLNSSRVPDLLV
>QNO69157.1 |envelope protein [Severe acute respiratory syndrome coronavirus 2]
MYSFVSEETGTLIVNSVLLFLAFVVFLLVTLAILTALRLCAYCCNIVNVSLVKPSFYVYS
RVKNLNSSRVPDLLV
>QNO69169.1 |envelope protein [Severe acute respiratory syndrome coronavirus 2]
MYSFVSEETGTLIVNSVLLFLAFVVFLLVTLAILTALRLCAYCCNIVNVSLVKPSFYVYS
RVKNLNSSRVPDLLV
>QNO69181.1 |envelope protein [Severe acute respiratory syndrome coronavirus 2]
MYSFVSEETGTLIVNSVLLFLAFVVFLLVTLAILTALRLCAYCCNIVNVSLVKPSFYVYS
RVKNLNSSRVPDLLV
>QNO69193.1 |envelope protein [Severe acute respiratory syndrome coronavirus 2]
MYSFVSEETGTLIVNSVLLFLAFVVFLLVTLAILTALRLCAYCCNIVNVSLVKPSFYVYS
RVKNLNSSRVPDLLV
>QNO69205.1 |envelope protein [Severe acute respiratory syndrome coronavirus 2]
MYSFVSEETGTLIVNSVLLFLAFVVFLLVTLAILTALRLCAYCCNIVNVSLVKPSFYVYS
RVKNLNSSRVPDLLV
>QNO69217.1 |envelope protein [Severe acute respiratory syndrome coronavirus 2]
MYSFVSEETGTLIVNSVLLFLAFVVFLLVTLAILTALRLCAYCCNIVNVSLVKPSFYVYS
RVKNLNSSRVPDLLV
>QNO69229.1 |envelope protein [Severe acute respiratory syndrome coronavirus 2]
MYSFVSEETGTLIVNSVLLFLAFVVFLLVTLAILTALRLCAYCCNIVNVSLVKPSFYVYS
RVKNLNSSRVPDLLV
>QNO69241.1 |envelope protein [Severe acute respiratory syndrome coronavirus 2]
MYSFVSEETGTLIVNSVLLFLAFVVFLLVTLAILTALRLCAYCCNIVNVSLVKPSFYVYS
RVKNLNSSRVPDLLV
>QNO69253.1 |envelope protein [Severe acute respiratory syndrome coronavirus 2]
MYSFVSEETGTLIVNSVLLFLAFVVFLLVTLAILTALRLCAYCCNIVNVSLVKPSFYVYS
RVKNLNSSRVPDLLV
>QNO69265.1 |envelope protein [Severe acute respiratory syndrome coronavirus 2]
MYSFVSEETGTLIVNSVLLFLAFVVFLLVTLAILTALRLCAYCCNIVNVSLVKPSFYVYS
RVKNLNSSRVPDLLV
>QNO69277.1 |envelope protein [Severe acute respiratory syndrome coronavirus 2]
MYSFVSEETGTLIVNSVLLFLAFVVFLLVTLAILTALRLCAYCCNIVNVSLVKPSFYVYS
RVKNLNSSRVPDLLV
>QNO69289.1 |envelope protein [Severe acute respiratory syndrome coronavirus 2]
MYSFVSEETGTLIVNSVLLFLAFVVFLLVTLAILTALRLCAYCCNIVNVSLVKPSFYVYS
RVKNLNSSRVPDLLV
>QNO69301.1 |envelope protein [Severe acute respiratory syndrome coronavirus 2]
MYSFVSEETGTLIVNSVLLFLAFVVFLLVTLAILTALRLCAYCCNIVNVSLVKPSFYVYS
RVKNLNSSRVPDLLV
>QNO69313.1 |envelope protein [Severe acute respiratory syndrome coronavirus 2]
MYSFVSEETGTLIVNSVLLFLAFVVFLLVTLAILTALRLCAYCCNIVNVSLVKPSFYVYS
RVKNLNSSRVPDLLV
>QNO69325.1 |envelope protein [Severe acute respiratory syndrome coronavirus 2]
MYSFVSEETGTLIVNSVLLFLAFVVFLLVTLAILTALRLCAYCCNIVNVSLVKPSFYVYS
RVKNLNSSRVPDLLV
>QNO69337.1 |envelope protein [Severe acute respiratory syndrome coronavirus 2]
MYSFVSEETGTLIVNSVLLFLAFVVFLLVTLAILTALRLCAYCCNIVNVSLVKPSFYVYS
RVKNLNSSRVPDLLV
>QNO69349.1 |envelope protein [Severe acute respiratory syndrome coronavirus 2]
MYSFVSEETGTLIVNSVLLFLAFVVFLLVTLAILTALRLCAYCCNIVNVSLVKPSFYVYS
RVKNLNSSRVPDLLV
>QNO69361.1 |envelope protein [Severe acute respiratory syndrome coronavirus 2]
MYSFVSEETGTLIVNSVLLFLAFVVFLLVTLAILTALRLCAYCCNIVNVSLVKPSFYVYS
RVKNLNSSRVPDLLV
>QNO69373.1 |envelope protein [Severe acute respiratory syndrome coronavirus 2]
MYSFVSEETGTLIVNSVLLFLAFVVFLLVTLAILTALRLCAYCCNIVNVSLVKPSFYVYS
RVKNLNSSRVPDLLV
>QNO69385.1 |envelope protein [Severe acute respiratory syndrome coronavirus 2]
MYSFVSEETGTLIVNSVLLFLAFVVFLLVTLAILTALRLCAYCCNIVNVSLVKPSFYVYS
RVKNLNSSRVPDLLV
>QNO69397.1 |envelope protein [Severe acute respiratory syndrome coronavirus 2]
MYSFVSEETGTLIVNSVLLFLAFVVFLLVTLAILTALRLCAYCCNIVNVSLVKPSFYVYS
RVKNLNSSRVPDLLV
>QNO69409.1 |envelope protein [Severe acute respiratory syndrome coronavirus 2]
MYSFVSEETGTLIVNSVLLFLAFVVFLLVTLAILTALRLCAYCCNIVNVSLVKPSFYVYS
RVKNLNSSRVPDLLV
>QNO69421.1 |envelope protein [Severe acute respiratory syndrome coronavirus 2]
MYSFVSEETGTLIVNSVLLFLAFVVFLLVTLAILTALRLCAYCCNIVNVSLVKPSFYVYS
RVKNLNSSRVPDLLV
>QNO69433.1 |envelope protein [Severe acute respiratory syndrome coronavirus 2]
MYSFVSEETGTLIVNSVLLFLAFVVFLLVTLAILTALRLCAYCCNIVNVSLVKPSFYVYS
RVKNLNSSRVPDLLV
>QNO69445.1 |envelope protein [Severe acute respiratory syndrome coronavirus 2]
MYSFVSEETGTLIVNSVLLFLAFVVFLLVTLAILTALRLCAYCCNIVNVSLVKPSFYVYS
RVKNLNSSRVPDLLV
>QNO69457.1 |envelope protein [Severe acute respiratory syndrome coronavirus 2]
MYSFVSEETGTLIVNSVLLFLAFVVFLLVTLAILTALRLCAYCCNIVNVSLVKPSFYVYS
RVKNLNSSRVPDLLV
>QNO69469.1 |envelope protein [Severe acute respiratory syndrome coronavirus 2]
MYSFVSEETGTLIVNSVLLFLAFVVFLLVTLAILTALRLCAYCCNIVNVSLVKPSFYVYS
RVKNLNSSRVPDLLV
>QNO69481.1 |envelope protein [Severe acute respiratory syndrome coronavirus 2]
MYSFVSEETGTLIVNSVLLFLAFVVFLLVTLAILTALRLCAYCCNIVNVSLVKPSFYVYS
RVKNLNSSRVPDLLV
>QNO69493.1 |envelope protein [Severe acute respiratory syndrome coronavirus 2]
MYSFVSEETGTLIVNSVLLFLAFVVFLLVTLAILTALRLCAYCCNIVNVSLVKPSFYVYS
RVKNLNSSRVPDLLV
>QNO69505.1 |envelope protein [Severe acute respiratory syndrome coronavirus 2]
MYSFVSEETGTLIVNSVLLFLAFVVFLLVTLAILTALRLCAYCCNIVNVSLVKPSFYVYS
RVKNLNSSRVPDLLV
>QNO69517.1 |envelope protein [Severe acute respiratory syndrome coronavirus 2]
MYSFVSEETGTLIVNSVLLFLAFVVFLLVTLAILTALRLCAYCCNIVNVSLVKPSFYVYS
RVKNLNSSRVPDLLV
>QNO69529.1 |envelope protein [Severe acute respiratory syndrome coronavirus 2]
MYSFVSEETGTLIVNSVLLFLAFVVFLLVTLAILTALRLCAYCCNIVNVSLVKPSFYVYS
RVKNLNSSRVPDLLV
>QNO69541.1 |envelope protein [Severe acute respiratory syndrome coronavirus 2]
MYSFVSEETGTLIVNSVLLFLAFVVFLLVTLAILTALRLCAYCCNIVNVSLVKPSFYVYS
RVKNLNSSRVPDLLV
>QNO69553.1 |envelope protein [Severe acute respiratory syndrome coronavirus 2]
MYSFVSEETGTLIVNSVLLFLAFVVFLLVTLAILTALRLCAYCCNIVNVSLVKPSFYVYS
RVKNLNSSRVPDLLV
>QNO69565.1 |envelope protein [Severe acute respiratory syndrome coronavirus 2]
MYSFVSEETGTLIVNSVLLFLAFVVFLLVTLAILTALRLCAYCCNIVNVSLVKPSFYVYS
RVKNLNSSRVPDLLV
>QNO69577.1 |envelope protein [Severe acute respiratory syndrome coronavirus 2]
MYSFVSEETGTLIVNSVLLFLAFVVFLLVTLAILTALRLCAYCCNIVNVSLVKPSFYVYS
RVKNLNSSRVPDLLV
>QNO69589.1 |envelope protein [Severe acute respiratory syndrome coronavirus 2]
MYSFVSEETGTLIVNSVLLFLAFVVFLLVTLAILTALRLCAYCCNIVNVSLVKPSFYVYS
RVKNLNSSRVPDLLV
>QNO69601.1 |envelope protein [Severe acute respiratory syndrome coronavirus 2]
MYSFVSEETGTLIVNSVLLFLAFVVFLLVTLAILTALRLCAYCCNIVNVSLVKPSFYVYS
RVKNLNSSRVPDLLV
>QNO69613.1 |envelope protein [Severe acute respiratory syndrome coronavirus 2]
MYSFVSEETGTLIVNSVLLFLAFVVFLLVTLAILTALRLCAYCCNIVNVSLVKPSFYVYS
RVKNLNSSRVPDLLV
>QNO69625.1 |envelope protein [Severe acute respiratory syndrome coronavirus 2]
MYSFVSEETGTLIVNSVLLFLAFVVFLLVTLAILTALRLCAYCCNIVNVSLVKPSFYVYS
RVKNLNSSRVPDLLV
>QNO69637.1 |envelope protein [Severe acute respiratory syndrome coronavirus 2]
MYSFVSEETGTLIVNSVLLFLAFVVFLLVTLAILTALRLCAYCCNIVNVSLVKPSFYVYS
RVKNLNSSRVPDLLV
>QNO69649.1 |envelope protein [Severe acute respiratory syndrome coronavirus 2]
MYSFVSEETGTLIVNSVLLFLAFVVFLLVTLAILTALRLCAYCCNIVNVSLVKPSFYVYS
RVKNLNSSRVPDLLV
>QNO69661.1 |envelope protein [Severe acute respiratory syndrome coronavirus 2]
MYSFVSEETGTLIVNSVLLFLAFVVFLLVTLAILTALRLCAYCCNIVNVSLVKPSFYVYS
RVKNLNSSRVPDLLV
>QNO69673.1 |envelope protein [Severe acute respiratory syndrome coronavirus 2]
MYSFVSEETGTLIVNSVLLFLAFVVFLLVTLAILTALRLCAYCCNIVNVSLVKPSFYVYS
RVKNLNSSRVPDLLV
>QNO69685.1 |envelope protein [Severe acute respiratory syndrome coronavirus 2]
MYSFVSEETGTLIVNSVLLFLAFVVFLLVTLAILTALRLCAYCCNIVNVSLVKPSFYVYS
RVKNLNSSRVPDLLV
>QNO69697.1 |envelope protein [Severe acute respiratory syndrome coronavirus 2]
MYSFVSEETGTLIVNSVLLFLAFVVFLLVTLAILTALRLCAYCCNIVNVSLVKPSFYVYS
RVKNLNSSRVPDLLV
>QNO69709.1 |envelope protein [Severe acute respiratory syndrome coronavirus 2]
MYSFVSEETGTLIVNSVLLFLAFVVFLLVTLAILTALRLCAYCCNIVNVSLVKPSFYVYS
RVKNLNSSRVPDLLV
>QNO69721.1 |envelope protein [Severe acute respiratory syndrome coronavirus 2]
MYSFVSEETGTLIVNSVLLFLAFVVFLLVTLAILTALRLCAYCCNIVNVSLVKPSFYVYS
RVKNLNSSRVPDLLV
>QNO69733.1 |envelope protein [Severe acute respiratory syndrome coronavirus 2]
MYSFVSEETGTLIVNSVLLFLAFVVFLLVTLAILTALRLCAYCCNIVNVSLVKPSFYVYS
RVKNLNSSRVPDLLV
>QNO69745.1 |envelope protein [Severe acute respiratory syndrome coronavirus 2]
MYSFVSEETGTLIVNSVLLFLAFVVFLLVTLAILTALRLCAYCCNIVNVSLVKPSFYVYS
RVKNLNSSRVPDLLV
>QNO69757.1 |envelope protein [Severe acute respiratory syndrome coronavirus 2]
MYSFVSEETGTLIVNSVLLFLAFVVFLLVTLAILTALRLCAYCCNIVNVSLVKPSFYVYS
RVKNLNSSRVPDLLV
>QNO69769.1 |envelope protein [Severe acute respiratory syndrome coronavirus 2]
MYSFVSEETGTLIVNSVLLFLAFVVFLLVTLAILTALRLCAYCCNIVNVSLVKPSFYVYS
RVKNLNSSRVPDLLV
>QNO69781.1 |envelope protein [Severe acute respiratory syndrome coronavirus 2]
MYSFVSEETGTLIVNSVLLFLAFVVFLLVTLAILTALRLCAYCCNIVNVSLVKPSFYVYS
RVKNLNSSRVPDLLV
>QNO69793.1 |envelope protein [Severe acute respiratory syndrome coronavirus 2]
MYSFVSEETGTLIVNSVLLFLAFVVFLLVTLAILTALRLCAYCCNIVNVSLVKPSFYVYS
RVKNLNSSRVPDLLV
>QNO69805.1 |envelope protein [Severe acute respiratory syndrome coronavirus 2]
MYSFVSEETGTLIVNSVLLFLAFVVFLLVTLAILTALRLCAYCCNIVNVSLVKPSFYVYS
RVKNLNSSRVPDLLV
>QNO69817.1 |envelope protein [Severe acute respiratory syndrome coronavirus 2]
MYSFVSEETGTLIVNSVLLFLAFVVFLLVTLAILTALRLCAYCCNIVNVSLVKPSFYVYS
RVKNLNSSRVPDLLV
>QNO69829.1 |envelope protein [Severe acute respiratory syndrome coronavirus 2]
MYSFVSEETGTLIVNSVLLFLAFVVFLLVTLAILTALRLCAYCCNIVNVSLVKPSFYVYS
RVKNLNSSRVPDLLV
>QNO69841.1 |envelope protein [Severe acute respiratory syndrome coronavirus 2]
MYSFVSEETGTLIVNSVLLFLAFVVFLLVTLAILTALRLCAYCCNIVNVSLVKPSFYVYS
RVKNLNSSRVPDLLV
>QNO69853.1 |envelope protein [Severe acute respiratory syndrome coronavirus 2]
MYSFVSEETGTLIVNSVLLFLAFVVFLLVTLAILTALRLCAYCCNIVNVSLVKPSFYVYS
RVKNLNSSRVPDLLV
>QNO69865.1 |envelope protein [Severe acute respiratory syndrome coronavirus 2]
MYSFVSEETGTLIVNSVLLFLAFVVFLLVTLAILTALRLCAYCCNIVNVSLVKPSFYVYS
RVKNLNSSRVPDLLV
>QNO69877.1 |envelope protein [Severe acute respiratory syndrome coronavirus 2]
MYSFVSEETGTLIVNSVLLFLAFVVFLLVTLAILTALRLCAYCCNIVNVSLVKPSFYVYS
RVKNLNSSRVPDLLV
>QNO69889.1 |envelope protein [Severe acute respiratory syndrome coronavirus 2]
MYSFVSEETGTLIVNSVLLFLAFVVFLLVTLAILTALRLCAYCCNIVNVSLVKPSFYVYS
RVKNLNSSRVPDLLV
>QNO69901.1 |envelope protein [Severe acute respiratory syndrome coronavirus 2]
MYSFVSEETGTLIVNSVLLFLAFVVFLLVTLAILTALRLCAYCCNIVNVSLVKPSFYVYS
RVKNLNSSRVPDLLV
>QNO69913.1 |envelope protein [Severe acute respiratory syndrome coronavirus 2]
MYSFVSEETGTLIVNSVLLFLAFVVFLLVTLAILTALRLCAYCCNIVNVSLVKPSFYVYS
RVKNLNSSRVPDLLV
>QNO69925.1 |envelope protein [Severe acute respiratory syndrome coronavirus 2]
MYSFVSEETGTLIVNSVLLFLAFVVFLLVTLAILTALRLCAYCCNIVNVSLVKPSFYVYS
RVKNLNSSRVPDLLV
>QNO69937.1 |envelope protein [Severe acute respiratory syndrome coronavirus 2]
MYSFVSEETGTLIVNSVLLFLAFVVFLLVTLAILTALRLCAYCCNIVNVSLVKPSFYVYS
RVKNLNSSRVPDLLV
>QNO69949.1 |envelope protein [Severe acute respiratory syndrome coronavirus 2]
MYSFVSEETGTLIVNSVLLFLAFVVFLLVTLAILTALRLCAYCCNIVNVSLVKPSFYVYS
RVKNLNSSRVPDLLV
>QNO69961.1 |envelope protein [Severe acute respiratory syndrome coronavirus 2]
MYSFVSEETGTLIVNSVLLFLAFVVFLLVTLAILTALRLCAYCCNIVNVSLVKPSFYVYS
RVKNLNSSRVPDLLV
>QNO69973.1 |envelope protein [Severe acute respiratory syndrome coronavirus 2]
MYSFVSEETGTLIVNSVLLFLAFVVFLLVTLAILTALRLCAYCCNIVNVSLVKPSFYVYS
RVKNLNSSRVPDLLV
>QNO69985.1 |envelope protein [Severe acute respiratory syndrome coronavirus 2]
MYSFVSEETGTLIVNSVLLFLAFVVFLLVTLAILTALRLCAYCCNIVNVSLVKPSFYVYS
RVKNLNSSRVPDLLV
>QNO69997.1 |envelope protein [Severe acute respiratory syndrome coronavirus 2]
MYSFVSEETGTLIVNSVLLFLAFVVFLLVTLAILTALRLCAYCCNIVNVSLVKPSFYVYS
RVKNLNSSRVPDLLV
>QNO70009.1 |envelope protein [Severe acute respiratory syndrome coronavirus 2]
MYSFVSEETGTLIVNSVLLFLAFVVFLLVTLAILTALRLCAYCCNIVNVSLVKPSFYVYS
RVKNLNSSRVPDLLV
>QNO70021.1 |envelope protein [Severe acute respiratory syndrome coronavirus 2]
MYSFVSEETGTLIVNSVLLFLAFVVFLLVTLAILTALRLCAYCCNIVNVSLVKPSFYVYS
RVKNLNSSRVPDLLV
>QNO70033.1 |envelope protein [Severe acute respiratory syndrome coronavirus 2]
MYSFVSEETGTLIVNSVLLFLAFVVFLLVTLAILTALRLCAYCCNIVNVSLVKPSFYVYS
RVKNLNSSRVPDLLV
>QNO70045.1 |envelope protein [Severe acute respiratory syndrome coronavirus 2]
MYSFVSEETGTLIVNSVLLFLAFVVFLLVTLAILTALRLCAYCCNIVNVSLVKPSFYVYS
RVKNLNSSRVPDLLV
>QNO70057.1 |envelope protein [Severe acute respiratory syndrome coronavirus 2]
MYSFVSEETGTLIVNSVLLFLAFVVFLLVTLAILTALRLCAYCCNIVNVSLVKPSFYVYS
RVKNLNSSRVPDLLV
>QNO70069.1 |envelope protein [Severe acute respiratory syndrome coronavirus 2]
MYSFVSEETGTLIVNSVLLFLAFVVFLLVTLAILTALRLCAYCCNIVNVSLVKPSFYVYS
RVKNLNSSRVPDLLV
>QNO70081.1 |envelope protein [Severe acute respiratory syndrome coronavirus 2]
MYSFVSEETGTLIVNSVLLFLAFVVFLLVTLAILTALRLCAYCCNIVNVSLVKPSFYVYS
RVKNLNSSRVPDLLV
>QNO70093.1 |envelope protein [Severe acute respiratory syndrome coronavirus 2]
MYSFVSEETGTLIVNSVLLFLAFVVFLLVTLAILTALRLCAYCCNIVNVSLVKPSFYVYS
RVKNLNSSRVPDLLV
>QNO70105.1 |envelope protein [Severe acute respiratory syndrome coronavirus 2]
MYSFVSEETGTLIVNSVLLFLAFVVFLLVTLAILTALRLCAYCCNIVNVSLVKPSFYVYS
RVKNLNSSRVPDLLV
>QNO70117.1 |envelope protein [Severe acute respiratory syndrome coronavirus 2]
MYSFVSEETGTLIVNSVLLFLAFVVFLLVTLAILTALRLCAYCCNIVNVSLVKPSFYVYS
RVKNLNSSRVPDLLV
>QNO70129.1 |envelope protein [Severe acute respiratory syndrome coronavirus 2]
MYSFVSEETGTLIVNSVLLFLAFVVFLLVTLAILTALRLCAYCCNIVNVSLVKPSFYVYS
RVKNLNSSRVPDLLV
>QNO70141.1 |envelope protein [Severe acute respiratory syndrome coronavirus 2]
MYSFVSEETGTLIVNSVLLFLAFVVFLLVTLAILTALRLCAYCCNIVNVSLVKPSFYVYS
RVKNLNSSRVPDLLV
>QNO70153.1 |envelope protein [Severe acute respiratory syndrome coronavirus 2]
MYSFVSEETGTLIVNSVLLFLAFVVFLLVTLAILTALRLCAYCCNIVNVSLVKPSFYVYS
RVKNLNSSRVPDLLV
>QNO70165.1 |envelope protein [Severe acute respiratory syndrome coronavirus 2]
MYSFVSEETGTLIVNSVLLFLAFVVFLLVTLAILTALRLCAYCCNIVNVSLVKPSFYVYS
RVKNLNSSRVPDLLV
>QNO70177.1 |envelope protein [Severe acute respiratory syndrome coronavirus 2]
MYSFVSEETGTLIVNSVLLFLAFVVFLLVTLAILTALRLCAYCCNIVNVSLVKPSFYVYS
RVKNLNSSRVPDLLV
>QNO70189.1 |envelope protein [Severe acute respiratory syndrome coronavirus 2]
MYSFVSEETGTLIVNSVLLFLAFVVFLLVTLAILTALRLCAYCCNIVNVSLVKPSFYVYS
RVKNLNSSRVPDLLV
>QNO70201.1 |envelope protein [Severe acute respiratory syndrome coronavirus 2]
MYSFVSEETGTLIVNSVLLFLAFVVFLLVTLAILTALRLCAYCCNIVNVSLVKPSFYVYS
RVKNLNSSRVPDLLV
>QNO70213.1 |envelope protein [Severe acute respiratory syndrome coronavirus 2]
MYSFVSEETGTLIVNSVLLFLAFVVFLLVTLAILTALRLCAYCCNIVNVSLVKPSFYVYS
RVKNLNSSRVPDLLV
>QNO70225.1 |envelope protein [Severe acute respiratory syndrome coronavirus 2]
MYSFVSEETGTLIVNSVLLFLAFVVFLLVTLAILTALRLCAYCCNIVNVSLVKPSFYVYS
RVKNLNSSRVPDLLV
>QNO70237.1 |envelope protein [Severe acute respiratory syndrome coronavirus 2]
MYSFVSEETGTLIVNSVLLFLAFVVFLLVTLAILTALRLCAYCCNIVNVSLVKPSFYVYS
RVKNLNSSRVPDLLV
>QNO70249.1 |envelope protein [Severe acute respiratory syndrome coronavirus 2]
MYSFVSEETGTLIVNSVLLFLAFVVFLLVTLAILTALRLCAYCCNIVNVSLVKPSFYVYS
RVKNLNSSRVPDLLV
>QNO70273.1 |envelope protein [Severe acute respiratory syndrome coronavirus 2]
MYSFVSEETGTLIVNSVLLFLAFVVFLLVTLAILTALRLCAYCCNIVNVSLVKPSFYVYS
RVKNLNSSRVPDLLV
>QNO70285.1 |envelope protein [Severe acute respiratory syndrome coronavirus 2]
MYSFVSEETGTLIVNSVLLFLAFVVFLLVTLAILTALRLCAYCCNIVNVSLVKPSFYVYS
RVKNLNSSRVPDLLV
>QNO70321.1 |envelope protein [Severe acute respiratory syndrome coronavirus 2]
MYSFVSEETGTLIVNSVLLFLAFVVFLLVTLAILTALRLCAYCCNIVNVSLVKPSFYVYS
RVKNLNSSRVPDLLV
>QNO70333.1 |envelope protein [Severe acute respiratory syndrome coronavirus 2]
MYSFVSEETGTLIVNSVLLFLAFVVFLLVTLAILTALRLCAYCCNIVNVSLVKPSFYVYS
RVKNLNSSRVPDLLV
>QNO70345.1 |envelope protein [Severe acute respiratory syndrome coronavirus 2]
MYSFVSEETGTLIVNSVLLFLAFVVFLLVTLAILTALRLCAYCCNIVNVSLVKPSFYVYS
RVKNLNSSRVPDLLV
>QNO70381.1 |envelope protein [Severe acute respiratory syndrome coronavirus 2]
MYSFVSEETGTLIVNSVLLFLAFVVFLLVTLAILTALRLCAYCCNIVNVSLVKPSFYVYS
RVKNLNSSRVPDLLV
>QNO70405.1 |envelope protein [Severe acute respiratory syndrome coronavirus 2]
MYSFVSEETGTLIVNSVLLFLAFVVFLLVTLAILTALRLCAYCCNIVNVSLVKPSFYVYS
RVKNLNSSRVPDLLV
>QNO70417.1 |envelope protein [Severe acute respiratory syndrome coronavirus 2]
MYSFVSEETGTLIVNSVLLFLAFVVFLLVTLAILTALRLCAYCCNIVNVSLVKPSFYVYS
RVKNLNSSRVPDLLV
>QNO70429.1 |envelope protein [Severe acute respiratory syndrome coronavirus 2]
MYSFVSEETGTLIVNSVLLFLAFVVFLLVTLAILTALRLCAYCCNIVNVSLVKPSFYVYS
RVKNLNSSRVPDLLV
>QNO70441.1 |envelope protein [Severe acute respiratory syndrome coronavirus 2]
MYSFVSEETGTLIVNSVLLFFAFVVFLLVTLAILTALRLCAYCCNIVNVSLVKPSFYVYS
RVKNLNSSRVPDLLV
>QNO70453.1 |envelope protein [Severe acute respiratory syndrome coronavirus 2]
MYSFVSEETGTLIVNSVLLFLAFVVFLLVTLAILTALRLCAYCCNIVNVSLVKPSFYVYS
RVKNLNSSRVPDLLV
>QNO70465.1 |envelope protein [Severe acute respiratory syndrome coronavirus 2]
MYSFVSEETGTLIVNSVLLFLAFVVFLLVTLAILTALRLCAYCCNIVNVSLVKPSFYVYS
RVKNLNSSRVPDLLV
>QNO70477.1 |envelope protein [Severe acute respiratory syndrome coronavirus 2]
MYSFVSEETGTLIVNSVLLFLAFVVFLLVTLAILTALRLCAYCCNIVNVSLVKPSFYVYS
RVKNLNSSRVPDLLV
>QNO70489.1 |envelope protein [Severe acute respiratory syndrome coronavirus 2]
MYSFVSEETGTLIVNSVLLFLAFVVFLLVTLAILTALRLCAYCCNIVNVSLVKPSFYVYS
RVKNLNSSRVPDLLV
>QNO70501.1 |envelope protein [Severe acute respiratory syndrome coronavirus 2]
MYSFVSEETGTLIVNSVLLFLAFVVFLLVTLAILTALRLCAYCCNIVNVSLVKPSFYVYS
RVKNLNSSRVPDLLV
>QNO70513.1 |envelope protein [Severe acute respiratory syndrome coronavirus 2]
MYSFVSEETGTLIVNSVLLFLAFVVFLLVTLAILTALRLCAYCCNIVNVSLVKPSFYVYS
RVKNLNSSRVPDLLV
>QNO70525.1 |envelope protein [Severe acute respiratory syndrome coronavirus 2]
MYSFVSEETGTLIVNSVLLFLAFVVFLLVTLAILTALRLCAYCCNIVNVSLVKPSFYVYS
RVKNLNSSRVPDLLV
>QNO70537.1 |envelope protein [Severe acute respiratory syndrome coronavirus 2]
MYSFVSEETGTLIVNSVLLFLAFVVFLLVTLAILTALRLCAYCCNIVNVSLVKPSFYVYS
RVKNLNSSRVPDLLV
>QNO70549.1 |envelope protein [Severe acute respiratory syndrome coronavirus 2]
MYSFVSEETGTLIVNSVLLFLAFVVFLLVTLAILTALRLCAYCCNIVNVSLVKPSFYVYS
RVKNLNSSRVPDLLV
>QNO70561.1 |envelope protein [Severe acute respiratory syndrome coronavirus 2]
MYSFVSEETGTLIVNSVLLFLAFVVFLLVTLAILTALRLCAYCCNIVNVSLVKPSFYVYS
RVKNLNSSRVPDLLV
>QNO70573.1 |envelope protein [Severe acute respiratory syndrome coronavirus 2]
MYSFVSEETGTLIVNSVLLFLAFVVFLLVTLAILTALRLCAYCCNIVNVSLVKPSFYVYS
RVKNLNSSRVPDLLV
>QNO70585.1 |envelope protein [Severe acute respiratory syndrome coronavirus 2]
MYSFVSEETGTLIVNSVLLFLAFVVFLLVTLAILTALRLCAYCCNIVNVSLVKPSFYVYS
RVKNLNSSRVPDLLV
>QNO70597.1 |envelope protein [Severe acute respiratory syndrome coronavirus 2]
MYSFVSEETGTLIVNSVLLFLAFVVFLLVTLAILTALRLCAYCCNIVNVSLVKPSFYVYS
RVKNLNSSRVPDLLV
>QNO70609.1 |envelope protein [Severe acute respiratory syndrome coronavirus 2]
MYSFVSEETGTLIVNSVLLFLAFVVFLLVTLAILTALRLCAYCCNIVNVSLVKPSFYVYS
RVKNLNSSRVPDLLV
>QNO70621.1 |envelope protein [Severe acute respiratory syndrome coronavirus 2]
MYSFVSEETGTLIVNSVLLFLAFVVFLLVTLAILTALRLCAYCCNIVNVSLVKPSFYVYS
RVKNLNSSRVPDLLV
>QNO70633.1 |envelope protein [Severe acute respiratory syndrome coronavirus 2]
MYSFVSEETGTLIVNSVLLFLAFVVFLLVTLAILTALRLCAYCCNIVNVSLVKPSFYVYS
RVKNLNSSRVPDLLV
>QNO70645.1 |envelope protein [Severe acute respiratory syndrome coronavirus 2]
MYSFVSEETGTLIVNSVLLFLAFVVFLLVTLAILTALRLCAYCCNIVNVSLVKPSFYVYS
RVKNLNSSRVPDLLV
>QNO70657.1 |envelope protein [Severe acute respiratory syndrome coronavirus 2]
MYSFVSEETGTLIVNSVLLFLAFVVFLLVTLAILTALRLCAYCCNIVNVSLVKPSFYVYS
RVKNLNSSRVPDLLV
>QNO70669.1 |envelope protein [Severe acute respiratory syndrome coronavirus 2]
MYSFVSEETGTLIVNSVLLFLAFVVFLLVTLAILTALRLCAYCCNIVNVSLVKPSFYVYS
RVKNLNSSRVPDLLV
>QNO70729.1 |envelope protein [Severe acute respiratory syndrome coronavirus 2]
MYSFVSEETGTLIVNSVLLFLAFVVFLLVTLAILTALRLCAYCCNIVNVSLVKPSFYVYS
RVKNLNSSRVPDLLV
>QNO70741.1 |envelope protein [Severe acute respiratory syndrome coronavirus 2]
MYSFVSEETGTLIVNSVLLFLAFVVFLLVTLAILTALRLCAYCCNIVNVSLVKPSFYVYS
RVKNLNSSRVPDLLV
>QNO70753.1 |envelope protein [Severe acute respiratory syndrome coronavirus 2]
MYSFVSEETGTLIVNSVLLFLAFVVFLLVTLAILTALRLCAYCCNIVNVSLVKPSFYVYS
RVKNLNSSRVPDLLV
>QNO70777.1 |envelope protein [Severe acute respiratory syndrome coronavirus 2]
MYSFVSEETGTLIVNSVLLFLAFVVFLLVTLAILTALRLCAYCCNIVNVSLVKPSFYVYS
RVKNLNSSRVPDLLV
>QNO70789.1 |envelope protein [Severe acute respiratory syndrome coronavirus 2]
MYSFVSEETGTLIVNSVLLFLAFVVFLLVTLAILTALRLCAYCCNIVNVSLVKPSFYVYS
RVKNLNSSRVPDLLV
>QNO70813.1 |envelope protein [Severe acute respiratory syndrome coronavirus 2]
MYSFVSEETGTLIVNSVLLFLAFVVFLLVTLAILTALRLCAYCCNIVNVSLVKPSFYVYS
RVKNLNSSRVPDLLV
>QNO70873.1 |envelope protein [Severe acute respiratory syndrome coronavirus 2]
MYSFVSEETGTLIVNSVLLFLAFVVFLLVTLAILTALRLCAYCCNIVNVSLVKPSFYVYS
RVKNLNSSRVPDLLV
>QNO70909.1 |envelope protein [Severe acute respiratory syndrome coronavirus 2]
MYSFVSEETGTLIVNSVLLFLAFVVFLLVTLAILTALRLCAYCCNIVNVSLVKPSFYVYS
RVKNLNSSRVPDLLV
>QNO70921.1 |envelope protein [Severe acute respiratory syndrome coronavirus 2]
MYSFVSEETGTLIVNSVLLFLAFVVFLLVTLAILTALRLCAYCCNIVNVSLVKPSFYVYS
RVKNLNSSRVPDLLV
>QNO70933.1 |envelope protein [Severe acute respiratory syndrome coronavirus 2]
MYSFVSEETGTLIVNSVLLFLAFVVFLLVTLAILTALRLCAYCCNIVNVSLVKPSFYVYS
RVKNLNSSRVPDLLV
>QNO70945.1 |envelope protein [Severe acute respiratory syndrome coronavirus 2]
MYSFVSEETGTLIVNSVLLFLAFVVFLLVTLAILTALRLCAYCCNIVNVSLVKPSFYVYS
RVKNLNSSRVPDLLV
>QNO70957.1 |envelope protein [Severe acute respiratory syndrome coronavirus 2]
MYSFVSEETGTLIVNSVLLFLAFVVFLLVTLAILTALRLCAYCCNIVNVSLVKPSFYVYS
RVKNLNSSRVPDLLV
>QNO70969.1 |envelope protein [Severe acute respiratory syndrome coronavirus 2]
MYSFVSEETGTLIVNSVLLFLAFVVFLLVTLAILTALRLCAYCCNIVNVSLVKPSFYVYS
RVKNLNSSRVPDLLV
>QNO70981.1 |envelope protein [Severe acute respiratory syndrome coronavirus 2]
MYSFVSEETGTLIVNSVLLFLAFVVFLLVTLAILTALRLCAYCCNIVNVSLVKPSFYVYS
RVKNLNSSRVPDLLV
>QNO71005.1 |envelope protein [Severe acute respiratory syndrome coronavirus 2]
MYSFVSEETGTLIVNSVLLFLAFVVFLLVTLAILTALRLCAYCCNIVNVSLVKPSFYVYS
RVKNLNSSRVPDLLV
>QNO71017.1 |envelope protein [Severe acute respiratory syndrome coronavirus 2]
MYSFVSEETGTLIVNSVLLFLAFVVFLLVTLAILTALRLCAYCCNIVNVSLVKPSFYVYS
RVKNLNSSRVPDLLV
>QNO71029.1 |envelope protein [Severe acute respiratory syndrome coronavirus 2]
MYSFVSEETGTLIVNSVLLFLAFVVFLLVTLAILTALRLCAYCCNIVNVSLVKPSFYVYS
RVKNLNSSRVPDLLV
>QNO71053.1 |envelope protein [Severe acute respiratory syndrome coronavirus 2]
MYSFVSEETGTLIVNSVLLFLAFVVFLLVTLAILTALRLCAYCCNIVNVSLVKPSFYVYS
RVKNLNSSRVPDLLV
>QNO71113.1 |envelope protein [Severe acute respiratory syndrome coronavirus 2]
MYSFVSEETGTLIVNSVLLFLAFVVFLLVTLAILTALRLCAYCCNIVNVSLVKPSFYVYS
RVKNLNSSRVPDLLV
>QNO71125.1 |envelope protein [Severe acute respiratory syndrome coronavirus 2]
MYSFVSEETGTLIVNSVLLFLAFVVFLLVTLAILTALRLCAYCCNIVNVSLVKPSFYVYS
RVKNLNSSRVPDLLV
>QNO71137.1 |envelope protein [Severe acute respiratory syndrome coronavirus 2]
MYSFVSEETGTLIVNSVLLFLAFVVFLLVTLAILTALRLCAYCCNIVNVSLVKPSFYVYS
RVKNLNSSRVPDLLV
>QNO71149.1 |envelope protein [Severe acute respiratory syndrome coronavirus 2]
MYSFVSEETGTLIVNSVLLFLAFVVFLLVTLAILTALRLCAYCCNIVNVSLVKPSFYVYS
RVKNLNSSRVPDLLV
>QNO71185.1 |envelope protein [Severe acute respiratory syndrome coronavirus 2]
MYSFVSEETGTLIVNSVLLFLAFVVFLLVTLAILTALRLCAYCCNIVNVSLVKPSFYVYS
RVKNLNSSRVPDLLV
>QNO71221.1 |envelope protein [Severe acute respiratory syndrome coronavirus 2]
MYSFVSEETGTLIVNSVLLFLAFVVFLLVTLAILTALRLCAYCCNIVNVSLVKPSFYVYS
RVKNLNSSRVPDLLV
>QNO71281.1 |envelope protein [Severe acute respiratory syndrome coronavirus 2]
MYSFVSEETGTLIVNSVLLFLAFVVFLLVTLAILTALRLCAYCCNIVNVSLVKPSFYVYS
RVKNLNSSRVPDLLV
>QNO71305.1 |envelope protein [Severe acute respiratory syndrome coronavirus 2]
MYSFVSEETGTLIVNSVLLFLAFVVFLLVTLAILTALRLCAYCCNIVNVSLVKPSFYVYS
RVKNLNSSRVPDLLV
>QNO71317.1 |envelope protein [Severe acute respiratory syndrome coronavirus 2]
MYSFVSEETGTLIVNSVLLFLAFVVFLLVTLAILTALRLCAYCCNIVNVSLVKPSFYVYS
RVKNLNSSRVPDLLV
>QNO71329.1 |envelope protein [Severe acute respiratory syndrome coronavirus 2]
MYSFVSEETGTLIVNSVLLFLAFVVFLLVTLAILTALRLCAYCCNIVNVSLVKPSFYVYS
RVKNLNSSRVPDLLV
>QNO71341.1 |envelope protein [Severe acute respiratory syndrome coronavirus 2]
MYSFVSEETGTLIVNSVLLFLAFVVFLLVTLAILTALRLCAYCCNIVNVSLVKPSFYVYS
RVKNLNSSRVPDLLV
>QNO71353.1 |envelope protein [Severe acute respiratory syndrome coronavirus 2]
MYSFVSEETGTLIVNSVLLFLAFVVFLLVTLAILTALRLCAYCCNIVNVSLVKPSFYVYS
RVKNLNSSRVPDLLV
>QNO71365.1 |envelope protein [Severe acute respiratory syndrome coronavirus 2]
MYSFVSEETGTLIVNSVLLFLAFVVFLLVTLAILTALRLCAYCCNIVNVSLVKPSFYVYS
RVKNLNSSRVPDLLV
>QNO71377.1 |envelope protein [Severe acute respiratory syndrome coronavirus 2]
MYSFVSEETGTLIVNSVLLFLAFVVFLLVTLAILTALRLCAYCCNIVNVSLVKPSFYVYS
RVKNLNSSRVPDLLV
>QNO71389.1 |envelope protein [Severe acute respiratory syndrome coronavirus 2]
MYSFVSEETGTLIVNSVLLFLAFVVFLLVTLAILTALRLCAYCCNIVNVSLVKPSFYVYS
RVKNLNSSRVPDLLV
>QNO71401.1 |envelope protein [Severe acute respiratory syndrome coronavirus 2]
MYSFVSEETGTLIVNSVLLFLAFVVFLLVTLAILTALRLCAYCCNIVNVSLVKPSFYVYS
RVKNLNSSRVPDLLV
>QNO71413.1 |envelope protein [Severe acute respiratory syndrome coronavirus 2]
MYSFVSEETGTLIVNSVLLFLAFVVFLLVTLAILTALRLCAYCCNIVNVSLVKPSFYVYS
RVKNLNSSRVPDLLV
>QNO71425.1 |envelope protein [Severe acute respiratory syndrome coronavirus 2]
MYSFVSEETGTLIVNSVLLFLAFVVFLLVTLAILTALRLCAYCCNIVNVSLVKPSFYVYS
RVKNLNSSRVPDLLV
>QNO71437.1 |envelope protein [Severe acute respiratory syndrome coronavirus 2]
MYSFVSEETGTLIVNSVLLFLAFVVFLLVTLAILTALRLCAYCCNIVNVSLVKPSFYVYS
RVKNLNSSRVPDLLV
>QNO71461.1 |envelope protein [Severe acute respiratory syndrome coronavirus 2]
MYSFVSEETGTLIVNSVLLFLAFVVFLLVTLAILTALRLCAYCCNIVNVSLVKPSFYVYS
RVKNLNSSRVPDLLV
>QNO71473.1 |envelope protein [Severe acute respiratory syndrome coronavirus 2]
MYSFVSEETGTLIVNSVLLFLAFVVFLLVTLAILTALRLCAYCCNIVNVSLVKPSFYVYS
RVKNLNSSRVPDLLV
>QNO71485.1 |envelope protein [Severe acute respiratory syndrome coronavirus 2]
MYSFVSEETGTLIVNSVLLFLAFVVFLLVTLAILTALRLCAYCCNIVNVSLVKPSFYVYS
RVKNLNSSRVPDLLV
>QNO71497.1 |envelope protein [Severe acute respiratory syndrome coronavirus 2]
MYSFVSEETGTLIVNSVLLFLAFVVFLLVTLAILTALRLCAYCCNIVNVSLVKPSFYVYS
RVKNLNSSRVPDLLV
>QNO71509.1 |envelope protein [Severe acute respiratory syndrome coronavirus 2]
MYSFVSEETGTLIVNSVLLFLAFVVFLLVTLAILTALRLCAYCCNIVNVSLVKPSFYVYS
RVKNLNSSRVPDLLV
>QNO71521.1 |envelope protein [Severe acute respiratory syndrome coronavirus 2]
MYSFVSEETGTLIVNSVLLFLAFVVFLLVTLAILTALRLCAYCCNIVNVSLVKPSFYVYS
RVKNLNSSRVPDLLV
>QNO71533.1 |envelope protein [Severe acute respiratory syndrome coronavirus 2]
MYSFVSEETGTLIVNSVLLFLAFVVFLLVTLAILTALRLCAYCCNIVNVSLVKPSFYVYS
RVKNLNSSRVPDLLV
>QNO71545.1 |envelope protein [Severe acute respiratory syndrome coronavirus 2]
MYSFVSEETGTLIVNSVLLFLAFVVFLLVTLAILTALRLCAYCCNIVNVSLVKPSFYVYS
RVKNLNSSRVPDLLV
>QNO71557.1 |envelope protein [Severe acute respiratory syndrome coronavirus 2]
MYSFVSEETGTLIVNSVLLFLAFVVFLLVTLAILTALRLCAYCCNIVNVSLVKPSFYVYS
RVKNLNSSRVPDLLV
>QNO71569.1 |envelope protein [Severe acute respiratory syndrome coronavirus 2]
MYSFVSEETGTLIVNSVLLFLAFVVFLLVTLAILTALRLCAYCCNIVNVSLVKPSFYVYS
RVKNLNSSRVPDLLV
>QNO71581.1 |envelope protein [Severe acute respiratory syndrome coronavirus 2]
MYSFVSEETGTLIVNSVLLFLAFVVFLLVTLAILTALRLCAYCCNIVNVSLVKPSFYVYS
RVKNLNSSRVPDLLV
>QNO71605.1 |envelope protein [Severe acute respiratory syndrome coronavirus 2]
MYSFVSEETGTLIVNSVLLFLAFVVFLLVTLAILTALRLCAYCCNIVNVSLVKPSFYVYS
RVKNLNSSRVPDLLV
>QNO71629.1 |envelope protein [Severe acute respiratory syndrome coronavirus 2]
MYSFVSEETGTLIVNSVLLFLAFVVFLLVTLAILTALRLCAYCCNIVNVSLVKPSFYVYS
RVKNLNSSRVPDLLV
>QNO71641.1 |envelope protein [Severe acute respiratory syndrome coronavirus 2]
MYSFVSEETGTLIVNSVLLFLAFVVFLLVTLAILTALRLCAYCCNIVNVSLVKPSFYVYS
RVKNLNSSRVPDLLV
>QNO71653.1 |envelope protein [Severe acute respiratory syndrome coronavirus 2]
MYSFVSEETGTLIVNSVLLFLAFVVFLLVTLAILTALRLCAYCCNIVNVSLVKPSFYVYS
RVKNLNSSRVPDLLV
>QNO71665.1 |envelope protein [Severe acute respiratory syndrome coronavirus 2]
MYSFVSEETGTLIVNSVLLFLAFVVFLLVTLAILTALRLCAYCCNIVNVSLVKPSFYVYS
RVKNLNSSRVPDLLV
>QNO71677.1 |envelope protein [Severe acute respiratory syndrome coronavirus 2]
MYSFVSEETGTLIVNSVLLFLAFVVFLLVTLAILTALRLCAYCCNIVNVSLVKPSFYVYS
RVKNLNSSRVPDLLV
>QNO71689.1 |envelope protein [Severe acute respiratory syndrome coronavirus 2]
MYSFVSEETGTLIVNSVLLFLAFVVFLLVTLAILTALRLCAYCCNIVNVSLVKPSFYVYS
RVKNLNSSRVPDLLV
>QNO71701.1 |envelope protein [Severe acute respiratory syndrome coronavirus 2]
MYSFVSEETGTLIVNSVLLFLAFVVFLLVTLAILTALRLCAYCCNIVNVSLVKPSFYVYS
RVKNLNSSRVPDLLV
>QNO71713.1 |envelope protein [Severe acute respiratory syndrome coronavirus 2]
MYSFVSEETGTLIVNSVLLFLAFVVFLLVTLAILTALRLCAYCCNIVNVSLVKPSFYVYS
RVKNLNSSRVPDLLV
>QNO71737.1 |envelope protein [Severe acute respiratory syndrome coronavirus 2]
MYSFVSEETGTLIVNSVLLFLAFVVFLLVTLAILTALRLCAYCCNIVNVSLVKPSFYVYS
RVKNLNSSRVPDLLV
>QNO71749.1 |envelope protein [Severe acute respiratory syndrome coronavirus 2]
MYSFVSEETGTLIVNSVLLFLAFVVFLLVTLAILTALRLCAYCCNIVNVSLVKPSFYVYS
RVKNLNSSRVPDLLV
>QNO71761.1 |envelope protein [Severe acute respiratory syndrome coronavirus 2]
MYSFVSEETGTLIVNSVLLFLAFVVFLLVTLAILTALRLCAYCCNIVNVSLVKPSFYVYS
RVKNLNSSRVPDLLV
>QNO71773.1 |envelope protein [Severe acute respiratory syndrome coronavirus 2]
MYSFVSEETGTLIVNSVLLFLAFVVFLLVTLAILTALRLCAYCCNIVNVSLVKPSFYVYS
RVKNLNSSRVPDLLV
>QNO71785.1 |envelope protein [Severe acute respiratory syndrome coronavirus 2]
MYSFVSEETGTLIVNSVLLFLAFVVFLLVTLAILTALRLCAYCCNIVNVSLVKPSFYVYS
RVKNLNSSRVPDLLV
>QNO71797.1 |envelope protein [Severe acute respiratory syndrome coronavirus 2]
MYSFVSEETGTLIVNSVLLFLAFVVFLLVTLAILTALRLCAYCCNIVNVSLVKPSFYVYS
RVKNLNSSRVPDLLV
>QNO71809.1 |envelope protein [Severe acute respiratory syndrome coronavirus 2]
MYSFVSEETGTLIVNSVLLFLAFVVFLLVTLAILTALRLCAYCCNIVNVSLVKPSFYVYS
RVKNLNSSRVPDLLV
>QNO71821.1 |envelope protein [Severe acute respiratory syndrome coronavirus 2]
MYSFVSEETGTLIVNSVLLFLAFVVFLLVTLAILTALRLCAYCCNIVNVSLVKPSFYVYS
RVKNLNSSRVPDLLV
>QNO71833.1 |envelope protein [Severe acute respiratory syndrome coronavirus 2]
MYSFVSEETGTLIVNSVLLFLAFVVFLLVTLAILTALRLCAYCCNIVNVSLVKPSFYVYS
RVKNLNSSRVPDLLV
>QNO71845.1 |envelope protein [Severe acute respiratory syndrome coronavirus 2]
MYSFVSEETGTLIVNSVLLFLAFVVFLLVTLAILTALRLCAYCCNIVNVSLVKPSFYVYS
RVKNLNSSRVPDLLV
>QNO71857.1 |envelope protein [Severe acute respiratory syndrome coronavirus 2]
MYSFVSEETGTLIVNSVLLFLAFVVFLLVTLAILTALRLCAYCCNIVNVSLVKPSFYVYS
RVKNLNSSRVPDLLV
>QNO71869.1 |envelope protein [Severe acute respiratory syndrome coronavirus 2]
MYSFVSEETGTLIVNSVLLFLAFVVFLLVTLAILTALRLCAYCCNIVNVSLVKPSFYVYS
RVKNLNSSRVPDLLV
>QNO71881.1 |envelope protein [Severe acute respiratory syndrome coronavirus 2]
MYSFVSEETGTLIVNSVLLFLAFVVFLLVTLAILTALRLCAYCCNIVNVSLVKPSFYVYS
RVKNLNSSRVPDLLV
>QNO71893.1 |envelope protein [Severe acute respiratory syndrome coronavirus 2]
MYSFVSEETGTLIVNSVLLFLAFVVFLLVTLAILTALRLCAYCCNIVNVSLVKPSFYVYS
RVKNLNSSRVPDLLV
>QNO71905.1 |envelope protein [Severe acute respiratory syndrome coronavirus 2]
MYSFVSEETGTLIVNSVLLFLAFVVFLLVTLAILTALRLCAYCCNIVNVSLVKPSFYVYS
RVKNLNSSRVPDLLV
>QNO71917.1 |envelope protein [Severe acute respiratory syndrome coronavirus 2]
MYSFVSEETGTLIVNSVLLFLAFVVFLLVTLAILTALRLCAYCCNIVNVSLVKPSFYVYS
RVKNLNSSRVPDLLV
>QNO71929.1 |envelope protein [Severe acute respiratory syndrome coronavirus 2]
MYSFVSEETGTLIVNSVLLFLAFVVFLLVTLAILTALRLCAYCCNIVNVSLVKPSFYVYS
RVKNLNSSRVPDLLV
>QNO71941.1 |envelope protein [Severe acute respiratory syndrome coronavirus 2]
MYSFVSEETGTLIVNSVLLFLAFVVFLLVTLAILTALRLCAYCCNIVNVSLVKPSFYVYS
RVKNLNSSRVPDLLV
>QNO71953.1 |envelope protein [Severe acute respiratory syndrome coronavirus 2]
MYSFVSEETGTLIVNSVLLFLAFVVFLLVTLAILTALRLCAYCCNIVNVSLVKPSFYVYS
RVKNLNSSRVPDLLV
>QNO71965.1 |envelope protein [Severe acute respiratory syndrome coronavirus 2]
MYSFVSEETGTLIVNSVLLFLAFVVFLLVTLAILTALRLCAYCCNIVNVSLVKPSFYVYS
RVKNLNSSRVPDLLV
>QNO71977.1 |envelope protein [Severe acute respiratory syndrome coronavirus 2]
MYSFVSEETGTLIVNSVLLFLAFVVFLLVTLAILTALRLCAYCCNIVNVSLVKPSFYVYS
RVKNLNSSRVPDLLV
>QNO71989.1 |envelope protein [Severe acute respiratory syndrome coronavirus 2]
MYSFVSEETGTLIVNSVLLFLAFVVFLLVTLAILTALRLCAYCCNIVNVSLVKPSFYVYS
RVKNLNSSRVPDLLV
>QNO72001.1 |envelope protein [Severe acute respiratory syndrome coronavirus 2]
MYSFVSEETGTLIVNSVLLFLAFVVFLLVTLAILTALRLCAYCCNIVNVSLVKPSFYVYS
RVKNLNSSRVPDLLV
>QNO72013.1 |envelope protein [Severe acute respiratory syndrome coronavirus 2]
MYSFVSEETGTLIVNSVLLFLAFVVFLLVTLAILTALRLCAYCCNIVNVSLVKPSFYVYS
RVKNLNSSRVPDLLV
>QNO72025.1 |envelope protein [Severe acute respiratory syndrome coronavirus 2]
MYSFVSEETGTLIVNSVLLFLAFVVFLLVTLAILTALRLCAYCCNIVNVSLVKPSFYVYS
RVKNLNSSRVPDLLV
>QNO72037.1 |envelope protein [Severe acute respiratory syndrome coronavirus 2]
MYSFVSEETGTLIVNSVLLFLAFVVFLLVTLAILTALRLCAYCCNIVNVSLVKPSFYVYS
RVKNLNSSRVPDLLV
>QNO72049.1 |envelope protein [Severe acute respiratory syndrome coronavirus 2]
MYSFVSEETGTLIVNSVLLFLAFVVFLLVTLAILTALRLCAYCCNIVNVSLVKPSFYVYS
RVKNLNSSRVPDLLV
>QNO72061.1 |envelope protein [Severe acute respiratory syndrome coronavirus 2]
MYSFVSEETGTLIVNSVLLFLAFVVFLLVTLAILTALRLCAYCCNIVNVSLVKPSFYVYS
RVKNLNSSRVPDLLV
>QNO72073.1 |envelope protein [Severe acute respiratory syndrome coronavirus 2]
MYSFVSEETGTLIVNSVLLFLAFVVFLLVTLAILTALRLCAYCCNIVNVSLVKPSFYVYS
RVKNLNSSRVPDLLV
>QNO72085.1 |envelope protein [Severe acute respiratory syndrome coronavirus 2]
MYSFVSEETGTLIVNSVLLFLAFVVFLLVTLAILTALRLCAYCCNIVNVSLVKPSFYVYS
RVKNLNSSRVPDLLV
>QNO72097.1 |envelope protein [Severe acute respiratory syndrome coronavirus 2]
MYSFVSEETGTLIVNSVLLFLAFVVFLLVTLAILTALRLCAYCCNIVNVSLVKPSFYVYS
RVKNLNSSRVPDLLV
>QNO72109.1 |envelope protein [Severe acute respiratory syndrome coronavirus 2]
MYSFVSEETGTLIVNSVLLFLAFVVFLLVTLAILTALRLCAYCCNIVNVSLVKPSFYVYS
RVKNLNSSRVPDLLV
>QNO72121.1 |envelope protein [Severe acute respiratory syndrome coronavirus 2]
MYSFVSEETGTLIVNSVLLFLAFVVFLLVTLAILTALRLCAYCCNIVNVSLVKPSFYVYS
RVKNLNSSRVPDLLV
>QNO72133.1 |envelope protein [Severe acute respiratory syndrome coronavirus 2]
MYSFVSEETGTLIVNSVLLFLAFVVFLLVTLAILTALRLCAYCCNIVNVSLVKPSFYVYS
RVKNLNSSRVPDLLV
>QNO72145.1 |envelope protein [Severe acute respiratory syndrome coronavirus 2]
MYSFVSEETGTLIVNSVLLFLAFVVFLLVTLAILTALRLCAYCCNIVNVSLVKPSFYVYS
RVKNLNSSRVPDLLV
>QNO72157.1 |envelope protein [Severe acute respiratory syndrome coronavirus 2]
MYSFVSEETGTLIVNSVLLFLAFVVFLLVTLAILTALRLCAYCCNIVNVSLVKPSFYVYS
RVKNLNSSRVPDLLV
>QNO72169.1 |envelope protein [Severe acute respiratory syndrome coronavirus 2]
MYSFVSEETGTLIVNSVLLFLAFVVFLLVTLAILTALRLCAYCCNIVNVSLVKPSFYVYS
RVKNLNSSRVPDLLV
>QNO72181.1 |envelope protein [Severe acute respiratory syndrome coronavirus 2]
MYSFVSEETGTLIVNSVLLFLAFVVFLLVTLAILTALRLCAYCCNIVNVSLVKPSFYVYS
RVKNLNSSRVPDLLV
>QNO72193.1 |envelope protein [Severe acute respiratory syndrome coronavirus 2]
MYSFVSEETGTLIVNSVLLFLAFVVFLLVTLAILTALRLCAYCCNIVNVSLVKPSFYVYS
RVKNLNSSRVPDLLV
>QNO72205.1 |envelope protein [Severe acute respiratory syndrome coronavirus 2]
MYSFVSEETGTLIVNSVLLFLAFVVFLLVTLAILTALRLCAYCCNIVNVSLVKPSFYVYS
RVKNLNSSRVPDLLV
>QNO72217.1 |envelope protein [Severe acute respiratory syndrome coronavirus 2]
MYSFVSEETGTLIVNSVLLFLAFVVFLLVTLAILTALRLCAYCCNIVNVSLVKPSFYVYS
RVKNLNSSRVPDLLV
>QNO72229.1 |envelope protein [Severe acute respiratory syndrome coronavirus 2]
MYSFVSEETGTLIVNSVLLFLAFVVFLLVTLAILTALRLCAYCCNIVNVSLVKPSFYVYS
RVKNLNSSRVPDLLV
>QNO72241.1 |envelope protein [Severe acute respiratory syndrome coronavirus 2]
MYSFVSEETGTLIVNSVLLFLAFVVFLLVTLAILTALRLCAYCCNIVNVSLVKPSFYVYS
RVKNLNSSRVPDLLV
>QNO72253.1 |envelope protein [Severe acute respiratory syndrome coronavirus 2]
MYSFVSEETGTLIVNSVLLFLAFVVFLLVTLAILTALRLCAYCCNIVNVSLVKPSFYVYS
RVKNLNSSRVPDLLV
>QNO72265.1 |envelope protein [Severe acute respiratory syndrome coronavirus 2]
MYSFVSEETGTLIVNSVLLFLAFVVFLLVTLAILTALRLCAYCCNIVNVSLVKPSFYVYS
RVKNLNSSRVPDLLV
>QNO72277.1 |envelope protein [Severe acute respiratory syndrome coronavirus 2]
MYSFVSEETGTLIVNSVLLFLAFVVFLLVTLAILTALRLCAYCCNIVNVSLVKPSFYVYS
RVKNLNSSRVPDLLV
>QNO72289.1 |envelope protein [Severe acute respiratory syndrome coronavirus 2]
MYSFVSEETGTLIVNSVLLFLAFVVFLLVTLAILTALRLCAYCCNIVNVSLVKPSFYVYS
RVKNLNSSRVPDLLV
>QNO72301.1 |envelope protein [Severe acute respiratory syndrome coronavirus 2]
MYSFVSEETGTLIVNSVLLFLAFVVFLLVTLAILTALRLCAYCCNIVNVSLVKPSFYVYS
RVKNLNSSRVPDLLV
>QNO72313.1 |envelope protein [Severe acute respiratory syndrome coronavirus 2]
MYSFVSEETGTLIVNSVLLFLAFVVFLLVTLAILTALRLCAYCCNIVNVSLVKPSFYVYS
RVKNLNSSRVPDLLV
>QNO72325.1 |envelope protein [Severe acute respiratory syndrome coronavirus 2]
MYSFVSEETGTLIVNSVLLFLAFVVFLLVTLAILTALRLCAYCCNIVNVSLVKPSFYVYS
RVKNLNSSRVPDLLV
>QNO72337.1 |envelope protein [Severe acute respiratory syndrome coronavirus 2]
MYSFVSEETGTLIVNSVLLFLAFVVFLLVTLAILTALRLCAYCCNIVNVSLVKPSFYVYS
RVKNLNSSRVPDLLV
>QNO72349.1 |envelope protein [Severe acute respiratory syndrome coronavirus 2]
MYSFVSEETGTLIVNSVLLFLAFVVFLLVTLAILTALRLCAYCCNIVNVSLVKPSFYVYS
RVKNLNSSRVPDLLV
>QNO72361.1 |envelope protein [Severe acute respiratory syndrome coronavirus 2]
MYSFVSEETGTLIVNSVLLFLAFVVFLLVTLAILTALRLCAYCCNIVNVSLVKPSFYVYS
RVKNLNSSRVPDLLV
>QNO72373.1 |envelope protein [Severe acute respiratory syndrome coronavirus 2]
MYSFVSEETGTLIVNSVLLFLAFVVFLLVTLAILTALRLCAYCCNIVNVSLVKPSFYVYS
RVKNLNSFRVPDLLV
>QNO72385.1 |envelope protein [Severe acute respiratory syndrome coronavirus 2]
MYSFVSEETGTLIVNSVLLFLAFVVFLLVTLAILTALRLCAYCCNIVNVSLVKPSFYVYS
RVKNLNSSRVPDLLV
>QNO72397.1 |envelope protein [Severe acute respiratory syndrome coronavirus 2]
MYSFVSEETGTLIVNSVLLFLAFVVFLLVTLAILTALRLCAYCCNIVNVSLVKPSFYVYS
RVKNLNSFRVPDLLV
>QNO72409.1 |envelope protein [Severe acute respiratory syndrome coronavirus 2]
MYSFVSEETGTLIVNSVLLFLAFVVFLLVTLAILTALRLCAYCCNIVNVSLVKPSFYVYS
RVKNLNSSRVPDLLV
>QNO72421.1 |envelope protein [Severe acute respiratory syndrome coronavirus 2]
MYSFVSEETGTLIVNSVLLFLAFVVFLLVTLAILTALRLCAYCCNIVNVSLVKPSFYVYS
RVKNLNSSRVPDLLV
>QNO72433.1 |envelope protein [Severe acute respiratory syndrome coronavirus 2]
MYSFVSEETGTLIVNSVLLFLAFVVFLLVTLAILTALRLCAYCCNIVNVSLVKPSFYVYS
RVKNLNSSRVPDLLV
>QNO72445.1 |envelope protein [Severe acute respiratory syndrome coronavirus 2]
MYSFVSEETGTLIVNSVLLFLAFVVFLLVTLAILTALRLCAYCCNIVNVSLVKPSFYVYS
RVKNLNSSRVPDLLV
>QNO72457.1 |envelope protein [Severe acute respiratory syndrome coronavirus 2]
MYSFVSEETGTLIVNSVLLFLAFVVFLLVTLAILTALRLCAYCCNIVNVSLVKPSFYVYS
RVKNLNSSRVPDLLV
>QNO72469.1 |envelope protein [Severe acute respiratory syndrome coronavirus 2]
MYSFVSEETGTLIVNSVLLFLAFVVFLLVTLAILTALRLCAYCCNIVNVSLVKPSFYVYS
RVKNLNSSRVPDLLV
>QNO72481.1 |envelope protein [Severe acute respiratory syndrome coronavirus 2]
MYSFVSEETGTLIVNSVLLFLAFVVFLLVTLAILTALRLCAYCCNIVNVSLVKPSFYVYS
RVKNLNSSRVPDLLV
>QNO72493.1 |envelope protein [Severe acute respiratory syndrome coronavirus 2]
MYSFVSEETGTLIVNSVLLFLAFVVFLLVTLAILTALRLCAYCCNIVNVSLVKPSFYVYS
RVKNLNSSRVPDLLV
>QNO72505.1 |envelope protein [Severe acute respiratory syndrome coronavirus 2]
MYSFVSEETGTLIVNSVLLFLAFVVFLLVTLAILTALRLCAYCCNIVNVSLVKPSFYVYS
RVKNLNSSRVPDLLV
>QNO72517.1 |envelope protein [Severe acute respiratory syndrome coronavirus 2]
MYSFVSEETGTLIVNSVLLFLAFVVFLLVTLAILTALRLCAYCCNIVNVSLVKPSFYVYS
RVKNLNSSRVPDLLV
>QNO72529.1 |envelope protein [Severe acute respiratory syndrome coronavirus 2]
MYSFVSEETGTLIVNSVLLFLAFVVFLLVTLAILTALRLCAYCCNIVNVSLVKPSFYVYS
RVKNLNSSRVPDLLV
>QNO72541.1 |envelope protein [Severe acute respiratory syndrome coronavirus 2]
MYSFVSEETGTLIVNSVLLFLAFVVFLLVTLAILTALRLCAYCCNIVNVSLVKPSFYVYS
RVKNLNSSRVPDLLV
>QNO72553.1 |envelope protein [Severe acute respiratory syndrome coronavirus 2]
MYSFVSEETGTLIVNSVLLFLAFVVFLLVTLAILTALRLCAYCCNIVNVSLVKPSFYVYS
RVKNLNSSRVPDLLV
>QNO72565.1 |envelope protein [Severe acute respiratory syndrome coronavirus 2]
MYSFVSEETGTLIVNSVLLFLAFVVFLLVTLAILTALRLCAYCCNIVNVSLVKPSFYVYS
RVKNLNSSRVPDLLV
>QNO72577.1 |envelope protein [Severe acute respiratory syndrome coronavirus 2]
MYSFVSEETGTLIVNSVLLFLAFVVFLLVTLAILTALRLCAYCCNIVNVSLVKPSFYVYS
RVKNLNSSRVPDLLV
>QNO72589.1 |envelope protein [Severe acute respiratory syndrome coronavirus 2]
MYSFVSEETGTLIVNSVLLFLAFVVFLLVTLAILTALRLCAYCCNIVNVSLVKPSFYVYS
RVKNLNSSRVPDLLV
>QNO72601.1 |envelope protein [Severe acute respiratory syndrome coronavirus 2]
MYSFVSEETGTLIVNSVLLFLAFVVFLLVTLAILTALRLCAYCCNIVNVSLVKPSFYVYS
RVKNLNSSRVPDLLV
>QNO72613.1 |envelope protein [Severe acute respiratory syndrome coronavirus 2]
MYSFVSEETGTLIVNSVLLFLAFVVFLLVTLAILTALRLCAYCCNIVNVSLVKPSFYVYS
RVKNLNSSRVPDLLV
>QNO72625.1 |envelope protein [Severe acute respiratory syndrome coronavirus 2]
MYSFVSEETGTLIVNSVLLFLAFVVFLLVTLAILTALRLCAYCCNIVNVSLVKPSFYVYS
RVKNLNSSRVPDLLV
>QNO72637.1 |envelope protein [Severe acute respiratory syndrome coronavirus 2]
MYSFVSEETGTLIVNSVLLFLAFVVFLLVTLAILTALRLCAYCCNIVNVSLVKPSFYVYS
RVKNLNSSRVPDLLV
>QNO72649.1 |envelope protein [Severe acute respiratory syndrome coronavirus 2]
MYSFVSEETGTLIVNSVLLFLAFVVFLLVTLAILTALRLCAYCCNIVNVSLVKPSFYVYS
RVKNLNSSRVPDLLV
>QNO72661.1 |envelope protein [Severe acute respiratory syndrome coronavirus 2]
MYSFVSEETGTLIVNSVLLFLAFVVFLLVTLAILTALRLCAYCCNIVNVSLVKPSFYVYS
RVKNLNSSRVPDLLV
>QNO72673.1 |envelope protein [Severe acute respiratory syndrome coronavirus 2]
MYSFVSEETGTLIVNSVLLFLAFVVFLLVTLAILTALRLCAYCCNIVNVSLVKPSFYVYS
RVKNLNSSRVPDLLV
>QNO72685.1 |envelope protein [Severe acute respiratory syndrome coronavirus 2]
MYSFVSEETGTLIVNSVLLFLAFVVFLLVTLAILTALRLCAYCCNIVNVSLVKPSFYVYS
RVKNLNSSRVPDLLV
>QNO72697.1 |envelope protein [Severe acute respiratory syndrome coronavirus 2]
MYSFVSEETGTLIVNSVLLFLAFVVFLLVTLAILTALRLCAYCCNIVNVSLVKPSFYVYS
RVKNLNSSRVPDLLV
>QNO72709.1 |envelope protein [Severe acute respiratory syndrome coronavirus 2]
MYSFVSEETGTLIVNSVLLFLAFVVFLLVTLAILTALRLCAYCCNIVNVSLVKPSFYVYS
RVKNLNSSRVPDLLV
>QNO72721.1 |envelope protein [Severe acute respiratory syndrome coronavirus 2]
MYSFVSEETGTLIVNSVLLFLAFVVFLLVTLAILTALRLCAYCCNIVNVSLVKPSFYVYS
RVKNLNSSRVPDLLV
>QNO72733.1 |envelope protein [Severe acute respiratory syndrome coronavirus 2]
MYSFVSEETGTLIVNSVLLFLAFVVFLLVTLAILTALRLCAYCCNIVNVSLVKPSFYVYS
RVKNLNSSRVPDLLV
>QNO72745.1 |envelope protein [Severe acute respiratory syndrome coronavirus 2]
MYSFVSEETGTLIVNSVLLFLAFVVFLLVTLAILTALRLCAYCCNIVNVSLVKPSFYVYS
RVKNLNSSRVPDLLV
>QNO72757.1 |envelope protein [Severe acute respiratory syndrome coronavirus 2]
MYSFVSEETGTLIVNSVLLFLAFVVFLLVTLAILTALRLCAYCCNIVNVSLVKPSFYVYS
RVKNLNSSRVPDLLV
>QNO72769.1 |envelope protein [Severe acute respiratory syndrome coronavirus 2]
MYSFVSEETGTLIVNSVLLFLAFVVFLLVTLAILTALRLCAYCCNIVNVSLVKPSFYVYS
RVKNLNSSRVPDLLV
>QNO72781.1 |envelope protein [Severe acute respiratory syndrome coronavirus 2]
MYSFVSEETGTLIVNSVLLFLAFVVFLLVTLAILTALRLCAYCCNIVNVSLVKPSFYVYS
RVKNLNSSRVPDLLV
>QNO72793.1 |envelope protein [Severe acute respiratory syndrome coronavirus 2]
MYSFVSEETGTLIVNSVLLFLAFVVFLLVTLAILTALRLCAYCCNIVNVSLVKPSFYVYS
RVKNLNSSRVPDLLV
>QNO72805.1 |envelope protein [Severe acute respiratory syndrome coronavirus 2]
MYSFVSEETGTLIVNSVLLFLAFVVFLLVTLAILTALRLCAYCCNIVNVSLVKPSFYVYS
RVKNLNSSRVPDLLV
>QNO72817.1 |envelope protein [Severe acute respiratory syndrome coronavirus 2]
MYSFVSEETGTLIVNSVLLFLAFVVFLLVTLAILTALRLCAYCCNIVNVSLVKPSFYVYS
RVKNLNSSRVPDLLV
>QNO72829.1 |envelope protein [Severe acute respiratory syndrome coronavirus 2]
MYSFVSEETGTLIVNSVLLFLAFVVFLLVTLAILTALRLCAYCCNIVNVSLVKPSFYVYS
RVKNLNSSRVPDLLV
>QNO72841.1 |envelope protein [Severe acute respiratory syndrome coronavirus 2]
MYSFVSEETGTLIVNSVLLFLAFVVFLLVTLAILTALRLCAYCCNIVNVSLVKPSFYVYS
RVKNLNSSRVPDLLV
>QNO72853.1 |envelope protein [Severe acute respiratory syndrome coronavirus 2]
MYSFVSEETGTLIVNSVLLFLAFVVFLLVTLAILTALRLCAYCCNIVNVSLVKPSFYVYS
RVKNLNSSRVPDLLV
>QNO72865.1 |envelope protein [Severe acute respiratory syndrome coronavirus 2]
MYSFVSEETGTLIVNSVLLFLAFVVFLLVTLAILTALRLCAYCCNIVNVSLVKPSFYVYS
RVKNLNSSRVPDLLV
>QNO72877.1 |envelope protein [Severe acute respiratory syndrome coronavirus 2]
MYSFVSEETGTLIVNSVLLFLAFVVFLLVTLAILTALRLCAYCCNIVNVSLVKPSFYVYS
RVKNLNSSRVPDLLV
>QNO72889.1 |envelope protein [Severe acute respiratory syndrome coronavirus 2]
MYSFVSEETGTLIVNSVLLFLAFVVFLLVTLAILTALRLCAYCCNIVNVSLVKPSFYVYS
RVKNLNSSRVPDLLV
>QNO72901.1 |envelope protein [Severe acute respiratory syndrome coronavirus 2]
MYSFVSEETGTLIVNSVLLFLAFVVFLLVTLAILTALRLCAYCCNIVNVSLVKPSFYVYS
RVKNLNSSRVPDLLV
>QNO72913.1 |envelope protein [Severe acute respiratory syndrome coronavirus 2]
MYSFVSEETGTLIVNSVLLFLAFVVFLLVTLAILTALRLCAYCCNIVNVSLVKPSFYVYS
RVKNLNSSRVPDLLV
>QNO72925.1 |envelope protein [Severe acute respiratory syndrome coronavirus 2]
MYSFVSEETGTLIVNSVLLFLAFVVFLLVTLAILTALRLCAYCCNIVNVSLVKPSFYVYS
RVKNLNSSRVPDLLV
>QNO72937.1 |envelope protein [Severe acute respiratory syndrome coronavirus 2]
MYSFVSEETGTLIVNSVLLFLAFVVFLLVTLAILTALRLCAYCCNIVNVSLVKPSFYVYS
RVKNLNSSRVPDLLV
>QNO72949.1 |envelope protein [Severe acute respiratory syndrome coronavirus 2]
MYSFVSEETGTLIVNSVLLFLAFVVFLLVTLAILTALRLCAYCCNIVNVSLVKPSFYVYS
RVKNLNSSRVPDLLV
>QNO72961.1 |envelope protein [Severe acute respiratory syndrome coronavirus 2]
MYSFVSEETGTLIVNSVLLFLAFVVFLLVTLAILTALRLCAYCCNIVNVSLVKPSFYVYS
RVKNLNSSRVPDLLV
>QNO72973.1 |envelope protein [Severe acute respiratory syndrome coronavirus 2]
MYSFVSEETGTLIVNSVLLFLAFVVFLLVTLAILTALRLCAYCCNIVNVSLVKPSFYVYS
RVKNLNSSRVPDLLV
>QNO72985.1 |envelope protein [Severe acute respiratory syndrome coronavirus 2]
MYSFVSEETGTLIVNSVLLFLAFVVFLLVTLAILTALRLCAYCCNIVNVSLVKPSFYVYS
RVKNLNSSRVPDLLV
>QNO72997.1 |envelope protein [Severe acute respiratory syndrome coronavirus 2]
MYSFVSEETGTLIVNSVLLFLAFVVFLLVTLAILTALRLCAYCCNIVNVSLVKPSFYVYS
RVKNLNSSRVPDLLV
>QNO73009.1 |envelope protein [Severe acute respiratory syndrome coronavirus 2]
MYSFVSEETGTLIVNSVLLFLAFVVFLLVTLAILTALRLCAYCCNIVNVSLVKPSFYVYS
RVKNLNSSRVPDLLV
>QNO73021.1 |envelope protein [Severe acute respiratory syndrome coronavirus 2]
MYSFVSEETGTLIVNSVLLFLAFVVFLLVTLAILTALRLCAYCCNIVNVSLVKPSFYVYS
RVKNLNSSRVPDLLV
>QNO73033.1 |envelope protein [Severe acute respiratory syndrome coronavirus 2]
MYSFVSEETGTLIVNSVLLFLAFVVFLLVTLAILTALRLCAYCCNIVNVSLVKPSFYVYS
RVKNLNSSRVPDLLV
>QNO73045.1 |envelope protein [Severe acute respiratory syndrome coronavirus 2]
MYSFVSEETGTLIVNSVLLFLAFVVFLLVTLAILTALRLCAYCCNIVNVSLVKPSFYVYS
RVKNLNSSRVPDLLV
>QNO73057.1 |envelope protein [Severe acute respiratory syndrome coronavirus 2]
MYSFVSEETGTLIVNSVLLFLAFVVFLLVTLAILTALRLCAYCCNIVNVSLVKPSFYVYS
RVKNLNSSRVPDLLV
>QNO73069.1 |envelope protein [Severe acute respiratory syndrome coronavirus 2]
MYSFVSEETGTLIVNSVLLFLAFVVFLLVTLAILTALRLCAYCCNIVNVSLVKPSFYVYS
RVKNLNSSRVPDLLV
>QNO73081.1 |envelope protein [Severe acute respiratory syndrome coronavirus 2]
MYSFVSEETGTLIVNSVLLFLAFVVFLLVTLAILTALRLCAYCCNIVNVSLVKPSFYVYS
RVKNLNSSRVPDLLV
>QNO73093.1 |envelope protein [Severe acute respiratory syndrome coronavirus 2]
MYSFVSEETGTLIVNSVLLFLAFVVFLLVTLAILTALRLCAYCCNIVNVSLVKPSFYVYS
RVKNLNSSRVPDLLV
>QNO73105.1 |envelope protein [Severe acute respiratory syndrome coronavirus 2]
MYSFVSEETGTLIVNSVLLFLAFVVFLLVTLAILTALRLCAYCCNIVNVSLVKPSFYVYS
RVKNLNSSRVPDLLV
>QNO73117.1 |envelope protein [Severe acute respiratory syndrome coronavirus 2]
MYSFVSEETGTLIVNSVLLFLAFVVFLLVTLAILTALRLCAYCCNIVNVSLVKPSFYVYS
RVKNLNSSRVPDLLV
>QNO73129.1 |envelope protein [Severe acute respiratory syndrome coronavirus 2]
MYSFVSEETGTLIVNSVLLFLAFVVFLLVTLAILTALRLCAYCCNIVNVSLVKPSFYVYS
RVKNLNSSRVPDLLV
>QNO73141.1 |envelope protein [Severe acute respiratory syndrome coronavirus 2]
MYSFVSEETGTLIVNSVLLFLAFVVFLLVTLAILTALRLCAYCCNIVNVSLVKPSFYVYS
RVKNLNSSRVPDLLV
>QNO73153.1 |envelope protein [Severe acute respiratory syndrome coronavirus 2]
MYSFVSEETGTLIVNSVLLFLAFVVFLLVTLAILTALRLCAYCCNIVNVSLVKPSFYVYS
RVKNLNSSRVPDLLV
>QNO73165.1 |envelope protein [Severe acute respiratory syndrome coronavirus 2]
MYSFVSEETGTLIVNSVLLFLAFVVFLLVTLAILTALRLCAYCCNIVNVSLVKPSFYVYS
RVKNLNSSRVPDLLV
>QNO73177.1 |envelope protein [Severe acute respiratory syndrome coronavirus 2]
MYSFVSEETGTLIVNSVLLFLAFVVFLLVTLAILTALRLCAYCCNIVNVSLVKPSFYVYS
RVKNLNSSRVPDLLV
>QNO73189.1 |envelope protein [Severe acute respiratory syndrome coronavirus 2]
MYSFVSEETGTLIVNSVLLFLAFVVFLLVTLAILTALRLCAYCCNIVNVSLVKPSFYVYS
RVKNLNSSRVPDLLV
>QNO73201.1 |envelope protein [Severe acute respiratory syndrome coronavirus 2]
MYSFVSEETGTLIVNSVLLFLAFVVFLLVTLAILTALRLCAYCCNIVNVSLVKPSFYVYS
RVKNLNSSRVPDLLV
>QNO73213.1 |envelope protein [Severe acute respiratory syndrome coronavirus 2]
MYSFVSEETGTLIVNSVLLFLAFVVFLLVTLAILTALRLCAYCCNIVNVSLVKPSFYVYS
RVKNLNSSRVPDLLV
>QNO73225.1 |envelope protein [Severe acute respiratory syndrome coronavirus 2]
MYSFVSEETGTLIVNSVLLFLAFVVFLLVTLAILTALRLCAYCCNIVNVSLVKPSFYVYS
RVKNLNSSRVPDLLV
>QNO73237.1 |envelope protein [Severe acute respiratory syndrome coronavirus 2]
MYSFVSEETGTLIVNSVLLFLAFVVFLLVTLAILTALRLCAYCCNIVNVSLVKPSFYVYS
RVKNLNSSRVPDLLV
>QNO73249.1 |envelope protein [Severe acute respiratory syndrome coronavirus 2]
MYSFVSEETGTLIVNSVLLFLAFVVFLLVTLAILTALRLCAYCCNIVNVSLVKPSFYVYS
RVKNLNSSRVPDLLV
>QNO73261.1 |envelope protein [Severe acute respiratory syndrome coronavirus 2]
MYSFVSEETGTLIVNSVLLFLAFVVFLLVTLAILTALRLCAYCCNIVNVSLVKPSFYVYS
RVKNLNSSRVPDLLV
>QNO73273.1 |envelope protein [Severe acute respiratory syndrome coronavirus 2]
MYSFVSEETGTLIVNSVLLFLAFVVFLLVTLAILTALRLCAYCCNIVNVSLVKPSFYVYS
RVKNLNSSRVPDLLV
>QNO73285.1 |envelope protein [Severe acute respiratory syndrome coronavirus 2]
MYSFVSEETGTLIVNSVLLFLAFVVFLLVTLAILTALRLCAYCCNIVNVSLVKPSFYVYS
RVKNLNSSRVPDLLV
>QNO73297.1 |envelope protein [Severe acute respiratory syndrome coronavirus 2]
MYSFVSEETGTLIVNSVLLFLAFVVFLLVTLAILTALRLCAYCCNIVNVSLVKPSFYVYS
RVKNLNSSRVPDLLV
>QNO73309.1 |envelope protein [Severe acute respiratory syndrome coronavirus 2]
MYSFVSEETGTLIVNSVLLFLAFVVFLLVTLAILTALRLCAYCCNIVNVSLVKPSFYVYS
RVKNLNSSRVPDLLV
>QNO73321.1 |envelope protein [Severe acute respiratory syndrome coronavirus 2]
MYSFVSEETGTLIVNSVLLFLAFVVFLLVTLAILTALRLCAYCCNIVNVSLVKPSFYVYS
RVKNLNSSRVPDLLV
>QNO73333.1 |envelope protein [Severe acute respiratory syndrome coronavirus 2]
MYSFVSEETGTLIVNSVLLFLAFVVFLLVTLAILTALRLCAYCCNIVNVSLVKPSFYVYS
RVKNLNSSRVPDLLV
>QNO73345.1 |envelope protein [Severe acute respiratory syndrome coronavirus 2]
MYSFVSEETGTLIVNSVLLFLAFVVFLLVTLAILTALRLCAYCCNIVNVSLVKPSFYVYS
RVKNLNSSRVPDLLV
>QNO73357.1 |envelope protein [Severe acute respiratory syndrome coronavirus 2]
MYSFVSEETGTLIVNSVLLFLAFVVFLLVTLAILTALRLCAYCCNIVNVSLVKPSFYVYS
RVKNLNSSRVPDLLV
>QNO73369.1 |envelope protein [Severe acute respiratory syndrome coronavirus 2]
MYSFVSEETGTLIVNSVLLFLAFVVFLLVTLAILTALRLCAYCCNIVNVSLVKPSFYVYS
RVKNLNSSRVPDLLV
>QNO73381.1 |envelope protein [Severe acute respiratory syndrome coronavirus 2]
MYSFVSEETGTLIVNSVLLFLAFVVFLLVTLAILTALRLCAYCCNIVNVSLVKPSFYVYS
RVKNLNSSRVPDLLV
>QNO73393.1 |envelope protein [Severe acute respiratory syndrome coronavirus 2]
MYSFVSEETGTLIVNSVLLFLAFVVFLLVTLAILTALRLCAYCCNIVNVSLVKPSFYVYS
RVKNLNSSRVPDLLV
>QNO73405.1 |envelope protein [Severe acute respiratory syndrome coronavirus 2]
MYSFVSEETGTLIVNSVLLFLAFVVFLLVTLAILTALRLCAYCCNIVNVSLVKPSFYVYS
RVKNLNSSRVPDLLV
>QNO73417.1 |envelope protein [Severe acute respiratory syndrome coronavirus 2]
MYSFVSEETGTLIVNSVLLFLAFVVFLLVTLAILTALRLCAYCCNIVNVSLVKPSFYVYS
RVKNLNSSRVPDLLV
>QNO73429.1 |envelope protein [Severe acute respiratory syndrome coronavirus 2]
MYSFVSEETGTLIVNSVLLFLAFVVFLLVTLAILTALRLCAYCCNIVNVSLVKPSFYVYS
RVKNLNSSRVPDLLV
>QNO73441.1 |envelope protein [Severe acute respiratory syndrome coronavirus 2]
MYSFVSEETGTLIVNSVLLFLAFVVFLLVTLAILTALRLCAYCCNIVNVSLVKPSFYVYS
RVKNLNSSRVPDLLV
>QNO73453.1 |envelope protein [Severe acute respiratory syndrome coronavirus 2]
MYSFVSEETGTLIVNSVLLFLAFVVFLLVTLAILTALRLCAYCCNIVNVSLVKPSFYVYS
RVKNLNSSRVPDLLV
>QNO73465.1 |envelope protein [Severe acute respiratory syndrome coronavirus 2]
MYSFVSEETGTLIVNSVLLFLAFVVFLLVTLAILTALRLCAYCCNIVNVSLVKPSFYVYS
RVKNLNSSRVPDLLV
>QNO73477.1 |envelope protein [Severe acute respiratory syndrome coronavirus 2]
MYSFVSEETGTLIVNSVLLFLAFVVFLLVTLAILTALRLCAYCCNIVNVSLVKPSFYVYS
RVKNLNSSRVPDLLV
>QNO73489.1 |envelope protein [Severe acute respiratory syndrome coronavirus 2]
MYSFVSEETGTLIVNSVLLFLAFVVFLLVTLAILTALRLCAYCCNIVNVSLVKPSFYVYS
RVKNLNSSRVPDLLV
>QNO73501.1 |envelope protein [Severe acute respiratory syndrome coronavirus 2]
MYSFVSEETGTLIVNSVLLFLAFVVFLLVTLAILTALRLCAYCCNIVNVSLVKPSFYVYS
RVKNLNSSRVPDLLV
>QNO73513.1 |envelope protein [Severe acute respiratory syndrome coronavirus 2]
MYSFVSEETGTLIVNSVLLFLAFVVFLLVTLAILTALRLCAYCCNIVNVSLVKPSFYVYS
RVKNLNSSRVPDLLV
>QNO73525.1 |envelope protein [Severe acute respiratory syndrome coronavirus 2]
MYSFVSEETGTLIVNSVLLFLAFVVFLLVTLAILTALRLCAYCCNIVNVSLVKPSFYVYS
RVKNLNSSRVPDLLV
>QNO73537.1 |envelope protein [Severe acute respiratory syndrome coronavirus 2]
MYSFVSEETGTLIVNSVLLFLAFVVFLLVTLAILTALRLCAYCCNIVNVSLVKPSFYVYS
RVKNLNSSRVPDLLV
>QNO73549.1 |envelope protein [Severe acute respiratory syndrome coronavirus 2]
MYSFVSEETGTLIVNSVLLFLAFVVFLLVTLAILTALRLCAYCCNIVNVSLVKPSFYVYS
RVKNLNSSRVPDLLV
>QNO73561.1 |envelope protein [Severe acute respiratory syndrome coronavirus 2]
MYSFVSEETGTLIVNSVLLFLAFVVFLLVTLAILTALRLCAYCCNIVNVSLVKPSFYVYS
RVKNLNSSRVPDLLV
>QNO73573.1 |envelope protein [Severe acute respiratory syndrome coronavirus 2]
MYSFVSEETGTLIVNSVLLFLAFVVFLLVTLAILTALRLCAYCCNIVNVSLVKPSFYVYS
RVKNLNSSRVPDLLV
>QNO73585.1 |envelope protein [Severe acute respiratory syndrome coronavirus 2]
MYSFVSEETGTLIVNSVLLFLAFVVFLLVTLAILTALRLCAYCCNIVNVSLVKPSFYVYS
RVKNLNSSRVPDLLV
>QNO73597.1 |envelope protein [Severe acute respiratory syndrome coronavirus 2]
MYSFVSEETGTLIVNSVLLFLAFVVFLLVTLAILTALRLCAYCCNIVNVSLVKPSFYVYS
RVKNLNSSRVPDLLV
>QNO73609.1 |envelope protein [Severe acute respiratory syndrome coronavirus 2]
MYSFVSEETGTLIVNSVLLFLAFVVFLLVTLAILTALRLCAYCCNIVNVSLVKPSFYVYS
RVKNLNSSRVPDLLV
>QNO73621.1 |envelope protein [Severe acute respiratory syndrome coronavirus 2]
MYSFVSEETGTLIVNSVLLFLAFVVFLLVTLAILTALRLCAYCCNIVNVSLVKPSFYVYS
RVKNLNSSRVPDLLV
>QNO73633.1 |envelope protein [Severe acute respiratory syndrome coronavirus 2]
MYSFVSEETGTLIVNSVLLFLAFVVFLLVTLAILTALRLCAYCCNIVNVSLVKPSFYVYS
RVKNLNSSRVPDLLV
>QNO73645.1 |envelope protein [Severe acute respiratory syndrome coronavirus 2]
MYSFVSEETGTLIVNSVLLFLAFVVFLLVTLAILTALRLCAYCCNIVNVSLVKPSFYVYS
RVKNLNSSRVPDLLV
>QNO73657.1 |envelope protein [Severe acute respiratory syndrome coronavirus 2]
MYSFVSEETGTLIVNSVLLFLAFVVFLLVTLAILTALRLCAYCCNIVNVSLVKPSFYVYS
RVKNLNSSRVPDLLV
>QNO73669.1 |envelope protein [Severe acute respiratory syndrome coronavirus 2]
MYSFVSEETGTLIVNSVLLFLAFVVFLLVTLAILTALRLCAYCCNIVNVSLVKPSFYVYS
RVKNLNSSRVPDLLV
>QNO73681.1 |envelope protein [Severe acute respiratory syndrome coronavirus 2]
MYSFVSEETGTLIVNSVLLFLAFVVFLLVTLAILTALRLCAYCCNIVNVSLVKPSFYVYS
RVKNLNSSRVPDLLV
>QNO73693.1 |envelope protein [Severe acute respiratory syndrome coronavirus 2]
MYSFVSEETGTLIVNSVLLFLAFVVFLLVTLAILTALRLCAYCCNIVNVSLVKPSFYVYS
RVKNLNSSRVPDLLV
>QNO73705.1 |envelope protein [Severe acute respiratory syndrome coronavirus 2]
MYSFVSEETGTLIVNSVLLFLAFVVFLLVTLAILTALRLCAYCCNIVNVSLVKPSFYVYS
RVKNLNSSRVPDLLV
>QNO73717.1 |envelope protein [Severe acute respiratory syndrome coronavirus 2]
MYSFVSEETGTLIVNSVLLFLAFVVFLLVTLAILTALRLCAYCCNIVNVSLVKPSFYVYS
RVKNLNSSRVPDLLV
>QNO73729.1 |envelope protein [Severe acute respiratory syndrome coronavirus 2]
MYSFVSEETGTLIVNSVLLFLAFVVFLLVTLAILTALRLCAYCCNIVNVSLVKPSFYVYS
RVKNLNSSRVPDLLV
>QNO73741.1 |envelope protein [Severe acute respiratory syndrome coronavirus 2]
MYSFVSEETGTLIVNSVLLFLAFVVFLLVTLAILTALRLCAYCCNIVNVSLVKPSFYVYS
RVKNLNSSRVPDLLV
>QNO73753.1 |envelope protein [Severe acute respiratory syndrome coronavirus 2]
MYSFVSEETGTLIVNSVLLFLAFVVFLLVTLAILTALRLCAYCCNIVNVSLVKPSFYVYS
RVKNLNSSRVPDLLV
>QNO73765.1 |envelope protein [Severe acute respiratory syndrome coronavirus 2]
MYSFVSEETGTLIVNSVLLFLAFVVFLLVTLAILTALRLCAYCCNIVNVSLVKPSFYVYS
RVKNLNSSRVPDLLV
>QNO73777.1 |envelope protein [Severe acute respiratory syndrome coronavirus 2]
MYSFVSEETGTLIVNSVLLFLAFVVFLLVTLAILTALRLCAYCCNIVNVSLVKPSFYVYS
RVKNLNSSRVPDLLV
>QNO73789.1 |envelope protein [Severe acute respiratory syndrome coronavirus 2]
MYSFVSEETGTLIVNSVLLFLAFVVFLLVTLAILTALRLCAYCCNIVNVSLVKPSFYVYS
RVKNLNSSRVPDLLV
>QNO73801.1 |envelope protein [Severe acute respiratory syndrome coronavirus 2]
MYSFVSEETGTLIVNSVLLFLAFVVFLLVTLAILTALRLCAYCCNIVNVSLVKPSFYVYS
RVKNLNSSRVPDLLV
>QNO73813.1 |envelope protein [Severe acute respiratory syndrome coronavirus 2]
MYSFVSEETGTLIVNSVLLFLAFVVFLLVTLAILTALRLCAYCCNIVNVSLVKPSFYVYS
RVKNLNSSRVPDLLV
>QNO73825.1 |envelope protein [Severe acute respiratory syndrome coronavirus 2]
MYSFVSEETGTLIVNSVLLFLAFVVFLLVTLAILTALRLCAYCCNIVNVSLVKPSFYVYS
RVKNLNSSRVPDLLV
>QNO73837.1 |envelope protein [Severe acute respiratory syndrome coronavirus 2]
MYSFVSEETGTLIVNSVLLFLAFVVFLLVTLAILTALRLCAYCCNIVNVSLVKPSFYVYS
RVKNLNSSRVPDLLV
>QNO73849.1 |envelope protein [Severe acute respiratory syndrome coronavirus 2]
MYSFVSEETGTLIVNSVLLFLAFVVFLLVTLAILTALRLCAYCCNIVNVSLVKPSFYVYS
RVKNLNSSRVPDLLV
>QNO73861.1 |envelope protein [Severe acute respiratory syndrome coronavirus 2]
MYSFVSEETGTLIVNSVLLFLAFVVFLLVTLAILTALRLCAYCCNIVNVSLVKPSFYVYS
RVKNLNSSRVPDLLV
>QNO73873.1 |envelope protein [Severe acute respiratory syndrome coronavirus 2]
MYSFVSEETGTLIVNSVLLFLAFVVFLLVTLAILTALRLCAYCCNIVNVSLVKPSFYVYS
RVKNLNSSRVPDLLV
>QNO73885.1 |envelope protein [Severe acute respiratory syndrome coronavirus 2]
MYSFVSEETGTLIVNSVLLFLAFVVFLLVTLAILTALRLCAYCCNIVNVSLVKPSFYVYS
RVKNLNSSRVPDLLV
>QNO73897.1 |envelope protein [Severe acute respiratory syndrome coronavirus 2]
MYSFVSEETGTLIVNSVLLFLAFVVFLLVTLAILTALRLCAYCCNIVNVSLVKPSFYVYS
RVKNLNSSRVPDLLV
>QNO73909.1 |envelope protein [Severe acute respiratory syndrome coronavirus 2]
MYSFVSEETGTLIVNSVLLFLAFVVFLLVTLAILTALRLCAYCCNIVNVSLVKPSFYVYS
RVKNLNSSRVPDLLV
>QNO73921.1 |envelope protein [Severe acute respiratory syndrome coronavirus 2]
MYSFVSEETGTLIVNSVLLFLAFVVFLLVTLAILTALRLCAYCCNIVNVSLVKPSFYVYS
RVKNLNSSRVPDLLV
>QNO73933.1 |envelope protein [Severe acute respiratory syndrome coronavirus 2]
MYSFVSEETGTLIVNSVLLFLAFVVFLLVTLAILTALRLCAYCCNIVNVSLVKPSFYVYS
RVKNLNSSRVPDLLV
>QNO73945.1 |envelope protein [Severe acute respiratory syndrome coronavirus 2]
MYSFVSEETGTLIVNSVLLFLAFVVFLLVTLAILTALRLCAYCCNIVNVSLVKPSFYVYS
RVKNLNSSRVPDLLV
>QNO73957.1 |envelope protein [Severe acute respiratory syndrome coronavirus 2]
MYSFVSEETGTLIVNSVLLFLAFVVFLLVTLAILTALRLCAYCCNIVNVSLVKPSFYVYS
RVKNLNSSRVPDLLV
>QNO73969.1 |envelope protein [Severe acute respiratory syndrome coronavirus 2]
MYSFVSEETGTLIVNSVLLFLAFVVFLLVTLAILTALRLCAYCCNIVNVSLVKPSFYVYS
RVKNLNSSRVPDLLV
>QNO73981.1 |envelope protein [Severe acute respiratory syndrome coronavirus 2]
MYSFVSEETGTLIVNSVLLFLAFVVFLLVTLAILTALRLCAYCCNIVNVSLVKPSFYVYS
RVKNLNSSRVPDLLV
>QNO73993.1 |envelope protein [Severe acute respiratory syndrome coronavirus 2]
MYSFVSEETGTLIVNSVLLFLAFVVFLLVTLAILTALRLCAYCCNIVNVSLVKPSFYVYS
RVKNLNSSRVPDLLV
>QNO74005.1 |envelope protein [Severe acute respiratory syndrome coronavirus 2]
MYSFVSEETGTLIVNSVLLFLAFVVFLLVTLAILTALRLCAYCCNIVNVSLVKPSFYVYS
RVKNLNSSRVPDLLV
>QNO74017.1 |envelope protein [Severe acute respiratory syndrome coronavirus 2]
MYSFVSEETGTLIVNSVLLFLAFVVFLLVTLAILTALRLCAYCCNIVNVSLVKPSFYVYS
RVKNLNSSRVPDLLV
>QNO74029.1 |envelope protein [Severe acute respiratory syndrome coronavirus 2]
MYSFVSEETGTLIVNSVLLFLAFVVFLLVTLAILTALRLCAYCCNIVNVSLVKPSFYVYS
RVKNLNSSRVPDLLV
>QNO74041.1 |envelope protein [Severe acute respiratory syndrome coronavirus 2]
MYSFVSEETGTLIVNSVLLFLAFVVFLLVTLAILTALRLCAYCCNIVNVSLVKPSFYVYS
RVKNLNSSRVPDLLV
>QNO74053.1 |envelope protein [Severe acute respiratory syndrome coronavirus 2]
MYSFVSEETGTLIVNSVLLFLAFVVFLLVTLAILTALRLCAYCCNIVNVSLVKPSFYVYS
RVKNLNSSRVPDLLV
>QNO74065.1 |envelope protein [Severe acute respiratory syndrome coronavirus 2]
MYSFVSEETGTLIVNSVLLFLAFVVFLLVTLAILTALRLCAYCCNIVNVSLVKPSFYVYS
RVKNLNSSRVPDLLV
>QNO74077.1 |envelope protein [Severe acute respiratory syndrome coronavirus 2]
MYSFVSEETGTLIVNSVLLFLAFVVFLLVTLAILTALRLCAYCCNIVNVSLVKPSFYVYS
RVKNLNSSRVPDLLV
>QNO74089.1 |envelope protein [Severe acute respiratory syndrome coronavirus 2]
MYSFVSEETGTLIVNSVLLFLAFVVFLLVTLAILTALRLCAYCCNIVNVSLVKPSFYVYS
RVKNLNSSRVPDLLV
>QNO74101.1 |envelope protein [Severe acute respiratory syndrome coronavirus 2]
MYSFVSEETGTLIVNSVLLFLAFVVFLLVTLAILTALRLCAYCCNIVNVSLVKPSFYVYS
RVKNLNSSRVPDLLV
>QNO74113.1 |envelope protein [Severe acute respiratory syndrome coronavirus 2]
MYSFVSEETGTLIVNSVLLFLAFVVFLLVTLAILTALRLCAYCCNIVNVSLVKPSFYVYS
RVKNLNSSRVPDLLV
>QNO74125.1 |envelope protein [Severe acute respiratory syndrome coronavirus 2]
MYSFVSEETGTLIVNSVLLFLAFVVFLLVTLAILTALRLCAYCCNIVNVSLVKPSFYVYS
RVKNLNSSRVPDLLV
>QNO74137.1 |envelope protein [Severe acute respiratory syndrome coronavirus 2]
MYSFVSEETGTLIVNSVLLFLAFVVFLLVTLAILTALRLCAYCCNIVNVSLVKPSFYVYS
RVKNLNSSRVPDLLV
>QNO74149.1 |envelope protein [Severe acute respiratory syndrome coronavirus 2]
MYSFVSEETGTLIVNSVLLFLAFVVFLLVTLAILTALRLCAYCCNIVNVSLVKPSFYVYS
RVKNLNSSRVPDLLV
>QNO74161.1 |envelope protein [Severe acute respiratory syndrome coronavirus 2]
MYSFVSEETGTLIVNSVLLFLAFVVFLLVTLAILTALRLCAYCCNIVNVSLVKPSFYVYS
RVKNLNSSRVPDLLV
>QNO74173.1 |envelope protein [Severe acute respiratory syndrome coronavirus 2]
MYSFVSEETGTLIVNSVLLFLAFVVFLLVTLAILTALRLCAYCCNIVNVSLVKPSFYVYS
RVKNLNSSRVPDLLV
>QNO74185.1 |envelope protein [Severe acute respiratory syndrome coronavirus 2]
MYSFVSEETGTLIVNSVLLFLAFVVFLLVTLAILTALRLCAYCCNIVNVSLVKPSFYVYS
RVKNLNSSRVPDLLV
>QNO74197.1 |envelope protein [Severe acute respiratory syndrome coronavirus 2]
MYSFVSEETGTLIVNSVLLFLAFVVFLLVTLAILTALRLCAYCCNIVNVSLVKPSFYVYS
RVKNLNSSRVPDLLV
>QNO74209.1 |envelope protein [Severe acute respiratory syndrome coronavirus 2]
MYSFVSEETGTLIVNSVLLFLAFVVFLLVTLAILTALRLCAYCCNIVNVSLVKPSFYVYS
RVKNLNSSRVPDLLV
>QNO74221.1 |envelope protein [Severe acute respiratory syndrome coronavirus 2]
MYSFVSEETGTLIVNSVLLFLAFVVFLLVTLAILTALRLCAYCCNIVNVSLVKPSFYVYS
RVKNLNSSRVPDLLV
>QNO74233.1 |envelope protein [Severe acute respiratory syndrome coronavirus 2]
MYSFVSEETGTLIVNSVLLFLAFVVFLLVTLAILTALRLCAYCCNIVNVSLVKPSFYVYS
RVKNLNSSRVPDLLV
>QNO74245.1 |envelope protein [Severe acute respiratory syndrome coronavirus 2]
MYSFVSEETGTLIVNSVLLFLAFVVFLLVTLAILTALRLCAYCCNIVNVSLVKPSFYVYS
RVKNLNSSRVPDLLV
>QNO74257.1 |envelope protein [Severe acute respiratory syndrome coronavirus 2]
MYSFVSEETGTLIVNSVLLFLAFVVFLLVTLAILTALRLCAYCCNIVNVSLVKPSFYVYS
RVKNLNSSRVPDLLV
>QNO74269.1 |envelope protein [Severe acute respiratory syndrome coronavirus 2]
MYSFVSEETGTLIVNSVLLFLAFVVFLLVTLAILTALRLCAYCCNIVNVSLVKPSFYVYS
RVKNLNSSRVPDLLV
>QNO74281.1 |envelope protein [Severe acute respiratory syndrome coronavirus 2]
MYSFVSEETGTLIVNSVLLFLAFVVFLLVTLAILTALRLCAYCCNIVNVSLVKPSFYVYS
RVKNLNSSRVPDLLV
>QNO74293.1 |envelope protein [Severe acute respiratory syndrome coronavirus 2]
MYSFVSEETGTLIVNSVLLFLAFVVFLLVTLAILTALRLCAYCCNIVNVSLVKPSFYVYS
RVKNLNSSRVPDLLV
>QNO74305.1 |envelope protein [Severe acute respiratory syndrome coronavirus 2]
MYSFVSEETGTLIVNSVLLFLAFVVFLLVTLAILTALRLCAYCCNIVNVSLVKPSFYVYS
RVKNLNSSRVPDLLV
>QNO74317.1 |envelope protein [Severe acute respiratory syndrome coronavirus 2]
MYSFVSEETGTLIVNSVLLFLAFVVFLLVTLAILTALRLCAYCCNIVNVSLVKPSFYVYS
RVKNLNSSRVPDLLV
>QNO74329.1 |envelope protein [Severe acute respiratory syndrome coronavirus 2]
MYSFVSEETGTLIVNSVLLFLAFVVFLLVTLAILTALRLCAYCCNIVNVSLVKPSFYVYS
RVKNLNSSRVPDLLV
>QNO74341.1 |envelope protein [Severe acute respiratory syndrome coronavirus 2]
MYSFVSEETGTLIVNSVLLFLAFVVFLLVTLAILTALRLCAYCCNIVNVSLVKPSFYVYS
RVKNLNSSRVPDLLV
>QNO74353.1 |envelope protein [Severe acute respiratory syndrome coronavirus 2]
MYSFVSEETGTLIVNSVLLFLAFVVFLLVTLAILTALRLCAYCCNIVNVSLVKPSFYVYS
RVKNLNSSRVPDLLV
>QNO74365.1 |envelope protein [Severe acute respiratory syndrome coronavirus 2]
MYSFVSEETGTLIVNSVLLFLAFVVFLLVTLAILTALRLCAYCCNIVNVSLVKPSFYVYS
RVKNLNSSRVPDLLV
>QNO74377.1 |envelope protein [Severe acute respiratory syndrome coronavirus 2]
MYSFVSEETGTLIVNSVLLFLAFVVFLLVTLAILTALRLCAYCCNIVNVSLVKPSFYVYS
RVKNLNSSRVPDLLV
>QNO74389.1 |envelope protein [Severe acute respiratory syndrome coronavirus 2]
MYSFVSEETGTLIVNSVLLFLAFVVFLLVTLAILTALRLCAYCCNIVNVSLVKPSFYVYS
RVKNLNSSRVPDLLV
>QNO74401.1 |envelope protein [Severe acute respiratory syndrome coronavirus 2]
MYSFVSEETGTLIVNSVLLFLAFVVFLLVTLAILTALRLCAYCCNIVNVSLVKPSFYVYS
RVKNLNSSRVPDLLV
>QNO74413.1 |envelope protein [Severe acute respiratory syndrome coronavirus 2]
MYSFVSEETGTLIVNSVLLFLAFVVFLLVTLAILTALRLCAYCCNIVNVSLVKPSFYVYS
RVKNLNSSRVPDLLV
>QNO74425.1 |envelope protein [Severe acute respiratory syndrome coronavirus 2]
MYSFVSEETGTLIVNSVLLFLAFVVFLLVTLAILTALRLCAYCCNIVNVSLVKPSFYVYS
RVKNLNSSRVPDLLV
>QNO74437.1 |envelope protein [Severe acute respiratory syndrome coronavirus 2]
MYSFVSEETGTLIVNSVLLFLAFVVFLLVTLAILTALRLCAYCCNIVNVSLVKPSFYVYS
RVKNLNSSRVPDLLV
>QNO74449.1 |envelope protein [Severe acute respiratory syndrome coronavirus 2]
MYSFVSEETGTLIVNSVLLFLAFVVFLLVTLAILTALRLCAYCCNIVNVSLVKPSFYVYS
RVKNLNSSRVPDLLV
>QNO74461.1 |envelope protein [Severe acute respiratory syndrome coronavirus 2]
MYSFVSEETGTLIVNSVLLFLAFVVFLLVTLAILTALRLCAYCCNIVNVSLVKPSFYVYS
RVKNLNSSRVPDLLV
>QNO74473.1 |envelope protein [Severe acute respiratory syndrome coronavirus 2]
MYSFVSEETGTLIVNSVLLFLAFVVFLLVTLAILTALRLCAYCCNIVNVSLVKPSFYVYS
RVKNLNSSRVPDLLV
>QNO74485.1 |envelope protein [Severe acute respiratory syndrome coronavirus 2]
MYSFVSEETGTLIVNSVLLFLAFVVFLLVTLAILTALRLCAYCCNIVNVSLVKPSFYVYS
RVKNLNSSRVPDLLV
>QNO74497.1 |envelope protein [Severe acute respiratory syndrome coronavirus 2]
MYSFVSEETGTLIVNSVLLFLAFVVFLLVTLAILTALRLCAYCCNIVNVSLVKPSFYVYS
RVKNLNSSRVPDLLV
>QNO74509.1 |envelope protein [Severe acute respiratory syndrome coronavirus 2]
MYSFVSEETGTLIVNSVLLFLAFVVFLLVTLAILTALRLCAYCCNIVNVSLVKPSFYVYS
RVKNLNSSRVPDLLV
>QNO74521.1 |envelope protein [Severe acute respiratory syndrome coronavirus 2]
MYSFVSEETGTLIVNSVLLFLAFVVFLLVTLAILTALRLCAYCCNIVNVSLVKPSFYVYS
RVKNLNSSRVPDLLV
>QNO74533.1 |envelope protein [Severe acute respiratory syndrome coronavirus 2]
MYSFVSEETGTLIVNSVLLFLAFVVFLLVTLAILTALRLCAYCCNIVNVSLVKPSFYVYS
RVKNLNSSRVPDLLV
>QNO74545.1 |envelope protein [Severe acute respiratory syndrome coronavirus 2]
MYSFVSEETGTLIVNSVLLFLAFVVFLLVTLAILTALRLCAYCCNIVNVSLVKPSFYVYS
RVKNLNSSRVPDLLV
>QNO74557.1 |envelope protein [Severe acute respiratory syndrome coronavirus 2]
MYSFVSEETGTLIVNSVLLFLAFVVFLLVTLAILTALRLCAYCCNIVNVSLVKPSFYVYS
RVKNLNSSRVPDLLV
>QNO74569.1 |envelope protein [Severe acute respiratory syndrome coronavirus 2]
MYSFVSEETGTLIVNSVLLFLAFVVFLLVTLAILTALRLCAYCCNIVNVSLVKPSFYVYS
RVKNLNSSRVPDLLV
>QNO74581.1 |envelope protein [Severe acute respiratory syndrome coronavirus 2]
MYSFVSEETGTLIVNSVLLFLAFVVFLLVTLAILTALRLCAYCCNIVNVSLVKPSFYVYS
RVKNLNSSRVPDLLV
>QNO74593.1 |envelope protein [Severe acute respiratory syndrome coronavirus 2]
MYSFVSEETGTLIVNSVLLFLAFVVFLLVTLAILTALRLCAYCCNIVNVSLVKPSFYVYS
RVKNLNSSRVPDLLV
>QNO74605.1 |envelope protein [Severe acute respiratory syndrome coronavirus 2]
MYSFVSEETGTLIVNSVLLFLAFVVFLLVTLAILTALRLCAYCCNIVNVSLVKPSFYVYS
RVKNLNSSRVPDLLV
>QNO74617.1 |envelope protein [Severe acute respiratory syndrome coronavirus 2]
MYSFVSEETGTLIVNSVLLFLAFVVFLLVTLAILTALRLCAYCCNIVNVSLVKPSFYVYS
RVKNLNSSRVPDLLV
>QNO74629.1 |envelope protein [Severe acute respiratory syndrome coronavirus 2]
MYSFVSEETGTLIVNSVLLFLAFVVFLLVTLAILTALRLCAYCCNIVNVSLVKPSFYVYS
RVKNLNSSRVPDLLV
>QNO74641.1 |envelope protein [Severe acute respiratory syndrome coronavirus 2]
MYSFVSEETGTLIVNSVLLFLAFVVFLLVTLAILTALRLCAYCCNIVNVSLVKPSFYVYS
RVKNLNSSRVPDLLV
>QNO74653.1 |envelope protein [Severe acute respiratory syndrome coronavirus 2]
MYSFVSEETGTLIVNSVLLFLAFVVFLLVTLAILTALRLCAYCCNIVNVSLVKPSFYVYS
RVKNLNSSRVPDLLV
>QNO74665.1 |envelope protein [Severe acute respiratory syndrome coronavirus 2]
MYSFVSEETGTLIVNSVLLFLAFVVFLLVTLAILTALRLCAYCCNIVNVSLVKPSFYVYS
RVKNLNSSRVPDLLV
>QNO74677.1 |envelope protein [Severe acute respiratory syndrome coronavirus 2]
MYSFVSEETGTLIVNSVLLFLAFVVFLLVTLAILTALRLCAYCCNIVNVSLVKPSFYVYS
RVKNLNSSRVPDLLV
>QNO74689.1 |envelope protein [Severe acute respiratory syndrome coronavirus 2]
MYSFVSEETGTLIVNSVLLFLAFVVFLLVTLAILTALRLCAYCCNIVNVSLVKPSFYVYS
RVKNLNSSRVPDLLV
>QNO74701.1 |envelope protein [Severe acute respiratory syndrome coronavirus 2]
MYSFVSEETGTLIVNSVLLFLAFVVFLLVTLAILTALRLCAYCCNIVNVSLVKPSFYVYS
RVKNLNSSRVPDLLV
>QNO74713.1 |envelope protein [Severe acute respiratory syndrome coronavirus 2]
MYSFVSEETGTLIVNSVLLFLAFVVFLLVTLAILTALRLCAYCCNIVNVSLVKPSFYVYS
RVKNLNSSRVPDLLV
>QNO74725.1 |envelope protein [Severe acute respiratory syndrome coronavirus 2]
MYSFVSEETGTLIVNSVLLFLAFVVFLLVTLAILTALRLCAYCCNIVNVSLVKPSFYVYS
RVKNLNSSRVPDLLV
>QNO74737.1 |envelope protein [Severe acute respiratory syndrome coronavirus 2]
MYSFVSEETGTLIVNSVLLFLAFVVFLLVTLAILTALRLCAYCCNIVNVSLVKPSFYVYS
RVKNLNSSRVPDLLV
>QNO74749.1 |envelope protein [Severe acute respiratory syndrome coronavirus 2]
MYSFVSEETGTLIVNSVLLFLAFVVFLLVTLAILTALRLCAYCCNIVNVSLVKPSFYVYS
RVKNLNSSRVPDLLV
>QNO74761.1 |envelope protein [Severe acute respiratory syndrome coronavirus 2]
MYSFVSEETGTLIVNSVLLFLAFVVFLLVTLAILTALRLCAYCCNIVNVSLVKPSFYVYS
RVKNLNSSRVPDLLV
>QNO74773.1 |envelope protein [Severe acute respiratory syndrome coronavirus 2]
MYSFVSEETGTLIVNSVLLFLAFVVFLLVTLAILTALRLCAYCCNIVNVSLVKPSFYVYS
RVKNLNSSRVPDLLV
>QNO74785.1 |envelope protein [Severe acute respiratory syndrome coronavirus 2]
MYSFVSEETGTLIVNSVLLFLAFVVFLLVTLAILTALRLCAYCCNIVNVSLVKPSFYVYS
RVKNLNSSRVPDLLV
>QNO74797.1 |envelope protein [Severe acute respiratory syndrome coronavirus 2]
MYSFVSEETGTLIVNSVLLFLAFVVFLLVTLAILTALRLCAYCCNIVNVSLVKPSFYVYS
RVKNLNSSRVPDLLV
>QNO74809.1 |envelope protein [Severe acute respiratory syndrome coronavirus 2]
MYSFVSEETGTLIVNSVLLFLAFVVFLLVTLAILTALRLCAYCCNIVNVSLVKPSFYVYS
RVKNLNSSRVPDLLV
>QNO74821.1 |envelope protein [Severe acute respiratory syndrome coronavirus 2]
MYSFVSEETGTLIVNSVLLFLAFVVFLLVTLAILTALRLCAYCCNIVNVSLVKPSFYVYS
RVKNLNSSRVPDLLV
>QNO74833.1 |envelope protein [Severe acute respiratory syndrome coronavirus 2]
MYSFVSEETGTLIVNSVLLFLAFVVFLLVTLAILTALRLCAYCCNIVNVSLVKPSFYVYS
RVKNLNSSRVPDLLV
>QNO74845.1 |envelope protein [Severe acute respiratory syndrome coronavirus 2]
MYSFVSEETGTLIVNSVLLFLAFVVFLLVTLAILTALRLCAYCCNIVNVSLVKPSFYVYS
RVKNLNSSRVPDLLV
>QNO74857.1 |envelope protein [Severe acute respiratory syndrome coronavirus 2]
MYSFVSEETGTLIVNSVLLFLAFVVFLLVTLAILTALRLCAYCCNIVNVSLVKPSFYVYS
RVKNLNSSRVPDLLV
>QNO74869.1 |envelope protein [Severe acute respiratory syndrome coronavirus 2]
MYSFVSEETGTLIVNSVLLFLAFVVFLLVTLAILTALRLCAYCCNIVNVSLVKPSFYVYS
RVKNLNSSRVPDLLV
>QNO74881.1 |envelope protein [Severe acute respiratory syndrome coronavirus 2]
MYSFVSEETGTLIVNSVLLFLAFVVFLLVTLAILTALRLCAYCCNIVNVSLVKPSFYVYS
RVKNLNSSRVPDLLV
>QNO74893.1 |envelope protein [Severe acute respiratory syndrome coronavirus 2]
MYSFVSEETGTLIVNSVLLFLAFVVFLLVTLAILTALRLCAYCCNIVNVSLVKPSFYVYS
RVKNLNSSRVPDLLV
>QNO74905.1 |envelope protein [Severe acute respiratory syndrome coronavirus 2]
MYSFVSEETGTLIVNSVLLFLAFVVFLLVTLAILTALRLCAYCCNIVNVSLVKPSFYVYS
RVKNLNSSRVPDLLV
>QNO74917.1 |envelope protein [Severe acute respiratory syndrome coronavirus 2]
MYSFVSEETGTLIVNSVLLFLAFVVFLLVTLAILTALRLCAYCCNIVNVSLVKPSFYVYS
RVKNLNSSRVPDLLV
>QNO74929.1 |envelope protein [Severe acute respiratory syndrome coronavirus 2]
MYSFVSEETGTLIVNSVLLFLAFVVFLLVTLAILTALRLCAYCCNIVNVSLVKPSFYVYS
RVKNLNSSRVPDLLV
>QNO74941.1 |envelope protein [Severe acute respiratory syndrome coronavirus 2]
MYSFVSEETGTLIVNSVLLFLAFVVFLLVTLAILTALRLCAYCCNIVNVSLVKPSFYVYS
RVKNLNSSRVPDLLV
>QNO74953.1 |envelope protein [Severe acute respiratory syndrome coronavirus 2]
MYSFVSEETGTLIVNSVLLFLAFVVFLLVTLAILTALRLCAYCCNIVNVSLVKPSFYVYS
RVKNLNSSRVPDLLV
>QNO74965.1 |envelope protein [Severe acute respiratory syndrome coronavirus 2]
MYSFVSEETGTLIVNSVLLFLAFVVFLLVTLAILTALRLCAYCCNIVNVSLVKPSFYVYS
RVKNLNSSRVPDLLV
>QNO74977.1 |envelope protein [Severe acute respiratory syndrome coronavirus 2]
MYSFVSEETGTLIVNSVLLFLAFVVFLLVTLAILTALRLCAYCCNIVNVSLVKPSFYVYS
RVKNLNSSRVPDLLV
>QNO74989.1 |envelope protein [Severe acute respiratory syndrome coronavirus 2]
MYSFVSEETGTLIVNSVLLFLAFVVFLLVTLAILTALRLCAYCCNIVNVSLVKPSFYVYS
RVKNLNSSRVPDLLV
>QNO75001.1 |envelope protein [Severe acute respiratory syndrome coronavirus 2]
MYSFVSEETGTLIVNSVLLFLAFVVFLLVTLAILTALRLCAYCCNIVNVSLVKPSFYVYS
RVKNLNSSRVPDLLV
>QNO75013.1 |envelope protein [Severe acute respiratory syndrome coronavirus 2]
MYSFVSEETGTLIVNSVLLFLAFVVFLLVTLAILTALRLCAYCCNIVNVSLVKPSFYVYS
RVKNLNSSRVPDLLV
>QNO75025.1 |envelope protein [Severe acute respiratory syndrome coronavirus 2]
MYSFVSEETGTLIVNSVLLFLAFVVFLLVTLAILTALRLCAYCCNIVNVSLVKPSFYVYS
RVKNLNSSRVPDLLV
>QNO75037.1 |envelope protein [Severe acute respiratory syndrome coronavirus 2]
MYSFVSEETGTLIVNSVLLFLAFVVFLLVTLAILTALRLCAYCCNIVNVSLVKPSFYVYS
RVKNLNSSRVPDLLV
>QNO75049.1 |envelope protein [Severe acute respiratory syndrome coronavirus 2]
MYSFVSEETGTLIVNSVLLFLAFVVFLLVTLAILTALRLCAYCCNIVNVSLVKPSFYVYS
RVKNLNSSRVPDLLV
>QNO75061.1 |envelope protein [Severe acute respiratory syndrome coronavirus 2]
MYSFVSEETGTLIVNSVLLFLAFVVFLLVTLAILTALRLCAYCCNIVNVSLVKPSFYVYS
RVKNLNSSRVPDLLV
>QNO75073.1 |envelope protein [Severe acute respiratory syndrome coronavirus 2]
MYSFVSEETGTLIVNSVLLFLAFVVFLLVTLAILTALRLCAYCCNIVNVSLVKPSFYVYS
RVKNLNSSRVPDLLV
>QNO75085.1 |envelope protein [Severe acute respiratory syndrome coronavirus 2]
MYSFVSEETGTLIVNSVLLFLAFVVFLLVTLAILTALRLCAYCCNIVNVSLVKPSFYVYS
RVKNLNSSRVPDLLV
>QNO75097.1 |envelope protein [Severe acute respiratory syndrome coronavirus 2]
MYSFVSEETGTLIVNSVLLFLAFVVFLLVTLAILTALRLCAYCCNIVNVSLVKPSFYVYS
RVKNLNSSRVPDLLV
>QNO75109.1 |envelope protein [Severe acute respiratory syndrome coronavirus 2]
MYSFVSEETGTLIVNSVLLFLAFVVFLLVTLAILTALRLCAYCCNIVNVSLVKPSFYVYS
RVKNLNSSRVPDLLV
>QNO75121.1 |envelope protein [Severe acute respiratory syndrome coronavirus 2]
MYSFVSEETGTLIVNSVLLFLAFVVFLLVTLAILTALRLCAYCCNIVNVSLVKPSFYVYS
RVKNLNSSRVPDLLV
>QNO75133.1 |envelope protein [Severe acute respiratory syndrome coronavirus 2]
MYSFVSEETGTLIVNSVLLFLAFVVFLLVTLAILTALRLCAYCCNIVNVSLVKPSFYVYS
RVKNLNSSRVPDLLV
>QNO75145.1 |envelope protein [Severe acute respiratory syndrome coronavirus 2]
MYSFVSEETGTLIVNSVLLFLAFVVFLLVTLAILTALRLCAYCCNIVNVSLVKPSFYVYS
RVKNLNSSRVPDLLV
>QNO75157.1 |envelope protein [Severe acute respiratory syndrome coronavirus 2]
MYSFVSEETGTLIVNSVLLFLAFVVFLLVTLAILTALRLCAYCCNIVNVSLVKPSFYVYS
RVKNLNSSRVPDLLV
>QNO75169.1 |envelope protein [Severe acute respiratory syndrome coronavirus 2]
MYSFVSEETGTLIVNSVLLFLAFVVFLLVTLAILTALRLCAYCCNIVNVSLVKPSFYVYS
RVKNLNSSRVPDLLV
>QNO75181.1 |envelope protein [Severe acute respiratory syndrome coronavirus 2]
MYSFVSEETGTLIVNSVLLFLAFVVFLLVTLAILTALRLCAYCCNIVNVSLVKPSFYVYS
RVKNLNSSRVPDLLV
>QNO75193.1 |envelope protein [Severe acute respiratory syndrome coronavirus 2]
MYSFVSEETGTLIVNSVLLFLAFVVFLLVTLAILTALRLCAYCCNIVNVSLVKPSFYVYS
RVKNLNSSRVPDLLV
>QNO75205.1 |envelope protein [Severe acute respiratory syndrome coronavirus 2]
MYSFVSEETGTLIVNSVLLFLAFVVFLLVTLAILTALRLCAYCCNIVNVSLVKPSFYVYS
RVKNLNSSRVPDLLV
>QNO75217.1 |envelope protein [Severe acute respiratory syndrome coronavirus 2]
MYSFVSEETGTLIVNSVLLFLAFVVFLLVTLAILTALRLCAYCCNIVNVSLVKPSFYVYS
RVKNLNSSRVPDLLV
>QNO75229.1 |envelope protein [Severe acute respiratory syndrome coronavirus 2]
MYSFVSEETGTLIVNSVLLFLAFVVFLLVTLAILTALRLCAYCCNIVNVSLVKPSFYVYS
RVKNLNSSRVPDLLV
>QNO75241.1 |envelope protein [Severe acute respiratory syndrome coronavirus 2]
MYSFVSEETGTLIVNSVLLFLAFVVFLLVTLAILTALRLCAYCCNIVNVSLVKPSFYVYS
RVKNLNSSRVPDLLV
>QNO75253.1 |envelope protein [Severe acute respiratory syndrome coronavirus 2]
MYSFVSEETGTLIVNSVLLFLAFVVFLLVTLAILTALRLCAYCCNIVNVSLVKPSFYVYS
RVKNLNSSRVPDLLV
>QNO75265.1 |envelope protein [Severe acute respiratory syndrome coronavirus 2]
MYSFVSEETGTLIVNSVLLFLAFVVFLLVTLAILTALRLCAYCCNIVNVSLVKPSFYVYS
RVKNLNSSRVPDLLV
>QNO75277.1 |envelope protein [Severe acute respiratory syndrome coronavirus 2]
MYSFVSEETGTLIVNSVLLFLAFVVFLLVTLAILTALRLCAYCCNIVNVSLVKPSFYVYS
RVKNLNSSRVPDLLV
>QNO75289.1 |envelope protein [Severe acute respiratory syndrome coronavirus 2]
MYSFVSEETGTLIVNSVLLFLAFVVFLLVTLAILTALRLCAYCCNIVNVSLVKPSFYVYS
RVKNLNSSRVPDLLV
>QNO75301.1 |envelope protein [Severe acute respiratory syndrome coronavirus 2]
MYSFVSEETGTLIVNSVLLFLAFVVFLLVTLAILTALRLCAYCCNIVNVSLVKPSFYVYS
RVKNLNSSRVPDLLV
>QNO75313.1 |envelope protein [Severe acute respiratory syndrome coronavirus 2]
MYSFVSEETGTLIVNSVLLFLAFVVFLLVTLAILTALRLCAYCCNIVNVSLVKPSFYVYS
RVKNLNSSRVPDLLV
>QNO75325.1 |envelope protein [Severe acute respiratory syndrome coronavirus 2]
MYSFVSEETGTLIVNSVLLFLAFVVFLLVTLAILTALRLCAYCCNIVNVSLVKPSFYVYS
RVKNLNSSRVPDLLV
>QNO75337.1 |envelope protein [Severe acute respiratory syndrome coronavirus 2]
MYSFVSEETGTLIVNSVLLFLAFVVFLLVTLAILTALRLCAYCCNIVNVSLVKPSFYVYS
RVKNLNSSRVPDLLV
>QNO75349.1 |envelope protein [Severe acute respiratory syndrome coronavirus 2]
MYSFVSEETGTLIVNSVLLFLAFVVFLLVTLAILTALRLCAYCCNIVNVSLVKPSFYVYS
RVKNLNSSRVPDLLV
>QNO75361.1 |envelope protein [Severe acute respiratory syndrome coronavirus 2]
MYSFVSEETGTLIVNSVLLFLAFVVFLLVTLAILTALRLCAYCCNIVNVSLVKPSFYVYS
RVKNLNSSRVPDLLV
>QNO75373.1 |envelope protein [Severe acute respiratory syndrome coronavirus 2]
MYSFVSEETGTLIVNSVLLFLAFVVFLLVTLAILTALRLCAYCCNIVNVSLVKPSFYVYS
RVKNLNSSRVPDLLV
>QNO75385.1 |envelope protein [Severe acute respiratory syndrome coronavirus 2]
MYSFVSEETGTLIVNSVLLFLAFVVFLLVTLAILTALRLCAYCCNIVNVSLVKPSFYVYS
RVKNLNSSRVPDLLV
>QNO75397.1 |envelope protein [Severe acute respiratory syndrome coronavirus 2]
MYSFVSEETGTLIVNSVLLFLAFVVFLLVTLAILTALRLCAYCCNIVNVSLVKPSFYVYS
RVKNLNSSRVPDLLV
>QNO75409.1 |envelope protein [Severe acute respiratory syndrome coronavirus 2]
MYSFVSEETGTLIVNSVLLFLAFVVFLLVTLAILTALRLCAYCCNIVNVSLVKPSFYVYS
RVKNLNSSRVPDLLV
>QNO75421.1 |envelope protein [Severe acute respiratory syndrome coronavirus 2]
MYSFVSEETGTLIVNSVLLFLAFVVFLLVTLAILTALRLCAYCCNIVNVSLVKPSFYVYS
RVKNLNSSRVPDLLV
>QNO75433.1 |envelope protein [Severe acute respiratory syndrome coronavirus 2]
MYSFVSEETGTLIVNSVLLFLAFVVFLLVTLAILTALRLCAYCCNIVNVSLVKPSFYVYS
RVKNLNSSRVPDLLV
>QNO75445.1 |envelope protein [Severe acute respiratory syndrome coronavirus 2]
MYSFVSEETGTLIVNSVLLFLAFVVFLLVTLAILTALRLCAYCCNIVNVSLVKPSFYVYS
RVKNLNSSRVPDLLV
>QNO75457.1 |envelope protein [Severe acute respiratory syndrome coronavirus 2]
MYSFVSEETGTLIVNSVLLFLAFVVFLLVTLAILTALRLCAYCCNIVNVSLVKPSFYVYS
RVKNLNSSRVPDLLV
>QNO75469.1 |envelope protein [Severe acute respiratory syndrome coronavirus 2]
MYSFVSEETGTLIVNSVLLFLAFVVFLLVTLAILTALRLCAYCCNIVNVSLVKPSFYVYS
RVKNLNSSRVPDLLV
>QNO75481.1 |envelope protein [Severe acute respiratory syndrome coronavirus 2]
MYSFVSEETGTLIVNSVLLFLAFVVFLLVTLAILTALRLCAYCCNIVNVSLVKPSFYVYS
RVKNLNSSRVPDLLV
>QNO75493.1 |envelope protein [Severe acute respiratory syndrome coronavirus 2]
MYSFVSEETGTLIVNSVLLFLAFVVFLLVTLAILTALRLCAYCCNIVNVSLVKPSFYVYS
RVKNLNSSRVPDLLV
>QNO75505.1 |envelope protein [Severe acute respiratory syndrome coronavirus 2]
MYSFVSEETGTLIVNSVLLFLAFVVFLLVTLAILTALRLCAYCCNIVNVSLVKPSFYVYS
RVKNLNSSRVPDLLV
>QNO75517.1 |envelope protein [Severe acute respiratory syndrome coronavirus 2]
MYSFVSEETGTLIVNSVLLFLAFVVFLLVTLAILTALRLCAYCCNIVNVSLVKPSFYVYS
RVKNLNSSRVPDLLV
>QNO75529.1 |envelope protein [Severe acute respiratory syndrome coronavirus 2]
MYSFVSEETGTLIVNSVLLFLAFVVFLLVTLAILTALRLCAYCCNIVNVSLVKPSFYVYS
RVKNLNSSRVPDLLV
>QNO75541.1 |envelope protein [Severe acute respiratory syndrome coronavirus 2]
MYSFVSEETGTLIVNSVLLFLAFVVFLLVTLAILTALRLCAYCCNIVNVSLVKPSFYVYS
RVKNLNSSRVPDLLV
>QNO75553.1 |envelope protein [Severe acute respiratory syndrome coronavirus 2]
MYSFVSEETGTLIVNSVLLFLAFVVFLLVTLAILTALRLCAYCCNIVNVSLVKPSFYVYS
RVKNLNSSRVPDLLV
>QNO75565.1 |envelope protein [Severe acute respiratory syndrome coronavirus 2]
MYSFVSEETGTLIVNSVLLFLAFVVFLLVTLAILTALRLCAYCCNIVNVSLVKPSFYVYS
RVKNLNSSRVPDLLV
>QNO75577.1 |envelope protein [Severe acute respiratory syndrome coronavirus 2]
MYSFVSEETGTLIVNSVLLFLAFVVFLLVTLAILTALRLCAYCCNIVNVSLVKPSFYVYS
RVKNLNSSRVPDLLV
>QNO75589.1 |envelope protein [Severe acute respiratory syndrome coronavirus 2]
MYSFVSEETGTLIVNSVLLFLAFVVFLLVTLAILTALRLCAYCCNIVNVSLVKPSFYVYS
RVKNLNSSRVPDLLV
>QNO75601.1 |envelope protein [Severe acute respiratory syndrome coronavirus 2]
MYSFVSEETGTLIVNSVLLFLAFVVFLLVTLAILTALRLCAYCCNIVNVSLVKPSFYVYS
RVKNLNSSRVPDLLV
>QNO75613.1 |envelope protein [Severe acute respiratory syndrome coronavirus 2]
MYSFVSEETGTLIVNSVLLFLAFVVFLLVTLAILTALRLCAYCCNIVNVSLVKPSFYVYS
RVKNLNSSRVPDLLV
>QNO75625.1 |envelope protein [Severe acute respiratory syndrome coronavirus 2]
MYSFVSEETGTLIVNSVLLFLAFVVFLLVTLAILTALRLCAYCCNIVNVSLVKPSFYVYS
RVKNLNSSRVPDLLV
>QNO75637.1 |envelope protein [Severe acute respiratory syndrome coronavirus 2]
MYSFVSEETGTLIVNSVLLFLAFVVFLLVTLAILTALRLCAYCCNIVNVSLVKPSFYVYS
RVKNLNSSRVPDLLV
>QNO75649.1 |envelope protein [Severe acute respiratory syndrome coronavirus 2]
MYSFVSEETGTLIVNSVLLFLAFVVFLLVTLAILTALRLCAYCCNIVNVSLVKPSFYVYS
RVKNLNSSRVPDLLV
>QNO75661.1 |envelope protein [Severe acute respiratory syndrome coronavirus 2]
MYSFVSEETGTLIVNSVLLFLAFVVFLLVTLAILTALRLCAYCCNIVNVSLVKPSFYVYS
RVKNLNSSRVPDLLV
>QNO75673.1 |envelope protein [Severe acute respiratory syndrome coronavirus 2]
MYSFVSEETGTLIVNSVLLFLAFVVFLLVTLAILTALRLCAYCCNIVNVSLVKPSFYVYS
RVKNLNSSRVPDLLV
>QNO75685.1 |envelope protein [Severe acute respiratory syndrome coronavirus 2]
MYSFVSEETGTLIVNSVLLFLAFVVFLLVTLAILTALRLCAYCCNIVNVSLVKPSFYVYS
RVKNLNSSRVPDLLV
>QNO75697.1 |envelope protein [Severe acute respiratory syndrome coronavirus 2]
MYSFVSEETGTLIVNSVLLFLAFVVFLLVTLAILTALRLCAYCCNIVNVSLVKPSFYVYS
RVKNLNSSRVPDLLV
>QNO75709.1 |envelope protein [Severe acute respiratory syndrome coronavirus 2]
MYSFVSEETGTLIVNSVLLFLAFVVFLLVTLAILTALRLCAYCCNIVNVSLVKPSFYVYS
RVKNLNSSRVPDLLV
>QNO75721.1 |envelope protein [Severe acute respiratory syndrome coronavirus 2]
MYSFVSEETGTLIVNSVLLFLAFVVFLLVTLAILTALRLCAYCCNIVNVSLVKPSFYVYS
RVKNLNSSRVPDLLV
>QNO75733.1 |envelope protein [Severe acute respiratory syndrome coronavirus 2]
MYSFVSEETGTLIVNSVLLFLAFVVFLLVTLAILTALRLCAYCCNIVNVSLVKPSFYVYS
RVKNLNSSRVPDLLV
>QNO75745.1 |envelope protein [Severe acute respiratory syndrome coronavirus 2]
MYSFVSEETGTLIVNSVLLFLAFVVFLLVTLAILTALRLCAYCCNIVNVSLVKPSFYVYS
RVKNLNSSRVPDLLV
>QNO75757.1 |envelope protein [Severe acute respiratory syndrome coronavirus 2]
MYSFVSEETGTLIVNSVLLFLAFVVFLLVTLAILTALRLCAYCCNIVNVSLVKPSFYVYS
RVKNLNSSRVPDLLV
>QNO75769.1 |envelope protein [Severe acute respiratory syndrome coronavirus 2]
MYSFVSEETGTLIVNSVLLFLAFVVFLLVTLAILTALRLCAYCCNIVNVSLVKPSFYVYS
RVKNLNSSRVPDLLV
>QNO75781.1 |envelope protein [Severe acute respiratory syndrome coronavirus 2]
MYSFVSEETGTLIVNSVLLFLAFVVFLLVTLAILTALRLCAYCCNIVNVSLVKPSFYVYS
RVKNLNSSRVPDLLV
>QNO75793.1 |envelope protein [Severe acute respiratory syndrome coronavirus 2]
MYSFVSEETGTLIVNSVLLFLAFVVFLLVTLAILTALRLCAYCCNIVNVSLVKPSFYVYS
RVKNLNSSRVPDLLV
>QNO75805.1 |envelope protein [Severe acute respiratory syndrome coronavirus 2]
MYSFVSEETGTLIVNSVLLFLAFVVFLLVTLAILTALRLCAYCCNIVNVSLVKPSFYVYS
RVKNLNSSRVPDLLV
>QNO75817.1 |envelope protein [Severe acute respiratory syndrome coronavirus 2]
MYSFVSEETGTLIVNSVLLFLAFVVFLLVTLAILTALRLCAYCCNIVNVSLVKPSFYVYS
RVKNLNSSRVPDLLV
>QNO75829.1 |envelope protein [Severe acute respiratory syndrome coronavirus 2]
MYSFVSEETGTLIVNSVLLFLAFVVFLLVTLAILTALRLCAYCCNIVNVSLVKPSFYVYS
RVKNLNSSRVPDLLV
>QNO75841.1 |envelope protein [Severe acute respiratory syndrome coronavirus 2]
MYSFVSEETGTLIVNSVLLFLAFVVFLLVTLAILTALRLCAYCCNIVNVSLVKPSFYVYS
RVKNLNSSRVPDLLV
>QNO75853.1 |envelope protein [Severe acute respiratory syndrome coronavirus 2]
MYSFVSEETGTLIVNSVLLFLAFVVFLLVTLAILTALRLCAYCCNIVNVSLVKPSFYVYS
RVKNLNSSRVPDLLV
>QNO75865.1 |envelope protein [Severe acute respiratory syndrome coronavirus 2]
MYSFVSEETGTLIVNSVLLFLAFVVFLLVTLAILTALRLCAYCCNIVNVSLVKPSFYVYS
RVKNLNSSRVPDLLV
>QNO75877.1 |envelope protein [Severe acute respiratory syndrome coronavirus 2]
MYSFVSEETGTLIVNSVLLFLAFVVFLLVTLAILTALRLCAYCCNIVNVSLVKPSFYVYS
RVKNLNSSRVPDLLV
>QNO75889.1 |envelope protein [Severe acute respiratory syndrome coronavirus 2]
MYSFVSEETGTLIVNSVLLFLAFVVFLLVTLAILTALRLCAYCCNIVNVSLVKPSFYVYS
RVKNLNSSRVPDLLV
>QNO75901.1 |envelope protein [Severe acute respiratory syndrome coronavirus 2]
MYSFVSEETGTLIVNSVLLFLAFVVFLLVTLAILTALRLCAYCCNIVNVSLVKPSFYVYS
RVKNLNSSRVPDLLV
>QNO75913.1 |envelope protein [Severe acute respiratory syndrome coronavirus 2]
MYSFVSEETGTLIVNSVLLFLAFVVFLLVTLAILTALRLCAYCCNIVNVSLVKPSFYVYS
RVKNLNSSRVPDLLV
>QNO75925.1 |envelope protein [Severe acute respiratory syndrome coronavirus 2]
MYSFVSEETGTLIVNSVLLFLAFVVFLLVTLAILTALRLCAYCCNIVNVSLVKPSFYVYS
RVKNLNSSRVPDLLV
>QNO75937.1 |envelope protein [Severe acute respiratory syndrome coronavirus 2]
MYSFVSEETGTLIVNSVLLFLAFVVFLLVTLAILTALRLCAYCCNIVNVSLVKPSFYVYS
RVKNLNSSRVPDLLV
>QNO75949.1 |envelope protein [Severe acute respiratory syndrome coronavirus 2]
MYSFVSEETGTLIVNSVLLFLAFVVFLLVTLAILTALRLCAYCCNIVNVSLVKPSFYVYS
RVKNLNSSRVPDLLV
>QNO75961.1 |envelope protein [Severe acute respiratory syndrome coronavirus 2]
MYSFVSEETGTLIVNSVLLFLAFVVFLLVTLAILTALRLCAYCCNIVNVSLVKPSFYVYS
RVKNLNSSRVPDLLV
>QNO75973.1 |envelope protein [Severe acute respiratory syndrome coronavirus 2]
MYSFVSEETGTLIVNSVLLFLAFVVFLLVTLAILTALRLCAYCCNIVNVSLVKPSFYVYS
RVKNLNSSRVPDLLV
>QNO75985.1 |envelope protein [Severe acute respiratory syndrome coronavirus 2]
MYSFVSEETGTLIVNSVLLFLAFVVFLLVTLAILTALRLCAYCCNIVNVSLVKPSFYVYS
RVKNLNSSRVPDLLV
>QNO75997.1 |envelope protein [Severe acute respiratory syndrome coronavirus 2]
MYSFVSEETGTLIVNSVLLFLAFVVFLLVTLAILTALRLCAYCCNIVNVSLVKPSFYVYS
RVKNLNSSRVPDLLV
>QNO76009.1 |envelope protein [Severe acute respiratory syndrome coronavirus 2]
MYSFVSEETGTLIVNSVLLFLAFVVFLLVTLAILTALRLCAYCCNIVNVSLVKPSFYVYS
RVKNLNSSRVPDLLV
>QNO76021.1 |envelope protein [Severe acute respiratory syndrome coronavirus 2]
MYSFVSEETGTLIVNSVLLFLAFVVFLLVTLAILTALRLCAYCCNIVNVSLVKPSFYVYS
RVKNLNSSRVPDLLV
>QNO76033.1 |envelope protein [Severe acute respiratory syndrome coronavirus 2]
MYSFVSEETGTLIVNSVLLFLAFVVFLLVTLAILTALRLCAYCCNIVNVSLVKPSFYVYS
RVKNLNSSRVPDLLV
>QNO76045.1 |envelope protein [Severe acute respiratory syndrome coronavirus 2]
MYSFVSEETGTLIVNSVLLFLAFVVFLLVTLAILTALRLCAYCCNIVNVSLVKPSFYVYS
RVKNLNSSRVPDLLV
>QNO76057.1 |envelope protein [Severe acute respiratory syndrome coronavirus 2]
MYSFVSEETGTLIVNSVLLFLAFVVFLLVTLAILTALRLCAYCCNIVNVSLVKPSFYVYS
RVKNLNSSRVPDLLV
>QNO76069.1 |envelope protein [Severe acute respiratory syndrome coronavirus 2]
MYSFVSEETGTLIVNSVLLFLAFVVFLLVTLAILTALRLCAYCCNIVNVSLVKPSFYVYS
RVKNLNSSRVPDLLV
>QNO76081.1 |envelope protein [Severe acute respiratory syndrome coronavirus 2]
MYSFVSEETGTLIVNSVLLFLAFVVFLLVTLAILTALRLCAYCCNIVNVSLVKPSFYVYS
RVKNLNSSRVPDLLV
>QNO76093.1 |envelope protein [Severe acute respiratory syndrome coronavirus 2]
MYSFVSEETGTLIVNSVLLFLAFVVFLLVTLAILTALRLCAYCCNIVNVSLVKPSFYVYS
RVKNLNSSRVPDLLV
>QNO76105.1 |envelope protein [Severe acute respiratory syndrome coronavirus 2]
MYSFVSEETGTLIVNSVLLFLAFVVFLLVTLAILTALRLCAYCCNIVNVSLVKPSFYVYS
RVKNLNSSRVPDLLV
>QNO76117.1 |envelope protein [Severe acute respiratory syndrome coronavirus 2]
MYSFVSEETGTLIVNSVLLFLAFVVFLLVTLAILTALRLCAYCCNIVNVSLVKPSFYVYS
RVKNLNSSRVPDLLV
>QNO76129.1 |envelope protein [Severe acute respiratory syndrome coronavirus 2]
MYSFVSEETGTLIVNSVLLFLAFVVFLLVTLAILTALRLCAYCCNIVNVSLVKPSFYVYS
RVKNLNSSRVPDLLV
>QNO76141.1 |envelope protein [Severe acute respiratory syndrome coronavirus 2]
MYSFVSEETGTLIVNSVLLFLAFVVFLLVTLAILTALRLCAYCCNIVNVSLVKPSFYVYS
RVKNLNSSRVPDLLV
>QNO76153.1 |envelope protein [Severe acute respiratory syndrome coronavirus 2]
MYSFVSEETGTLIVNSVLLFLAFVVFLLVTLAILTALRLCAYCCNIVNVSLVKPSFYVYS
RVKNLNSSRVPDLLV
>QNO76165.1 |envelope protein [Severe acute respiratory syndrome coronavirus 2]
MYSFVSEETGTLIVNSVLLFLAFVVFLLVTLAILTALRLCAYCCNIVNVSLVKPSFYVYS
RVKNLNSSRVPDLLV
>QNO76177.1 |envelope protein [Severe acute respiratory syndrome coronavirus 2]
MYSFVSEETGTLIVNSVLLFLAFVVFLLVTLAILTALRLCAYCCNIVNVSLVKPSFYVYS
RVKNLNSSRVPDLLV
>QNO76189.1 |envelope protein [Severe acute respiratory syndrome coronavirus 2]
MYSFVSEETGTLIVNSVLLFLAFVVFLLVTLAILTALRLCAYCCNIVNVSLVKPSFYVYS
RVKNLNSSRVPDLLV
>QNO76201.1 |envelope protein [Severe acute respiratory syndrome coronavirus 2]
MYSFVSEETGTLIVNSVLLFLAFVVFLLVTLAILTALRLCAYCCNIVNVSLVKPSFYVYS
RVKNLNSSRVPDLLV
>QNO76213.1 |envelope protein [Severe acute respiratory syndrome coronavirus 2]
MYSFVSEETGTLIVNSVLLFLAFVVFLLVTLAILTALRLCAYCCNIVNVSLVKPSFYVYS
RVKNLNSSRVPDLLV
>QNO76225.1 |envelope protein [Severe acute respiratory syndrome coronavirus 2]
MYSFVSEETGTLIVNSVLLFLAFVVFLLVTLAILTALRLCAYCCNIVNVSLVKPSFYVYS
RVKNLNSSRVPDLLV
>QNO76237.1 |envelope protein [Severe acute respiratory syndrome coronavirus 2]
MYSFVSEETGTLIVNSVLLFLAFVVFLLVTLAILTALRLCAYCCNIVNVSLVKPSFYVYS
RVKNLNSSRVPDLLV
>QNO76249.1 |envelope protein [Severe acute respiratory syndrome coronavirus 2]
MYSFVSEETGTLIVNSVLLFLAFVVFLLVTLAILTALRLCAYCCNIVNVSLVKPSFYVYS
RVKNLNSSRVPDLLV
>QNO76261.1 |envelope protein [Severe acute respiratory syndrome coronavirus 2]
MYSFVSEETGTLIVNSVLLFLAFVVFLLVTLAILTALRLCAYCCNIVNVSLVKPSFYVYS
RVKNLNSSRVPDLLV
>QNO76273.1 |envelope protein [Severe acute respiratory syndrome coronavirus 2]
MYSFVSEETGTLIVNSVLLFLAFVVFLLVTLAILTALRLCAYCCNIVNVSLVKPSFYVYS
RVKNLNSSRVPDLLV
>QNO76285.1 |envelope protein [Severe acute respiratory syndrome coronavirus 2]
MYSFVSEETGTLIVNSVLLFLAFVVFLLVTLAILTALRLCAYCCNIVNVSLVKPSFYVYS
RVKNLNSSRVPDLLV
>QNO76297.1 |envelope protein [Severe acute respiratory syndrome coronavirus 2]
MYSFVSEETGTLIVNSVLLFLAFVVFLLVTLAILTALRLCAYCCNIVNVSLVKPSFYVYS
RVKNLNSSRVPDLLV
>QNO76309.1 |envelope protein [Severe acute respiratory syndrome coronavirus 2]
MYSFVSEETGTLIVNSVLLFLAFVVFLLVTLAILTALRLCAYCCNIVNVSLVKPSFYVYS
RVKNLNSSRVPDLLV
>QNO76321.1 |envelope protein [Severe acute respiratory syndrome coronavirus 2]
MYSFVSEETGTLIVNSVLLFLAFVVFLLVTLAILTALRLCAYCCNIVNVSLVKPSFYVYS
RVKNLNSSRVPDLLV
>QNO76333.1 |envelope protein [Severe acute respiratory syndrome coronavirus 2]
MYSFVSEETGTLIVNSVLLFLAFVVFLLVTLAILTALRLCAYCCNIVNVSLVKPSFYVYS
RVKNLNSSRVPDLLV
>QNO76345.1 |envelope protein [Severe acute respiratory syndrome coronavirus 2]
MYSFVSEETGTLIVNSVLLFLAFVVFLLVTLAILTALRLCAYCCNIVNVSLVKPSFYVYS
RVKNLNSSRVPDLLV
>QNO76357.1 |envelope protein [Severe acute respiratory syndrome coronavirus 2]
MYSFVSEETGTLIVNSVLLFLAFVVFLLVTLAILTALRLCAYCCNIVNVSLVKPSFYVYS
RVKNLNSSRVPDLLV
>QNO76369.1 |envelope protein [Severe acute respiratory syndrome coronavirus 2]
MYSFVSEETGTLIVNSVLLFLAFVVFLLVTLAILTALRLCAYCCNIVNVSLVKPSFYVYS
RVKNLNSSRVPDLLV
>QNO76381.1 |envelope protein [Severe acute respiratory syndrome coronavirus 2]
MYSFVSEETGTLIVNSVLLFLAFVVFLLVTLAILTALRLCAYCCNIVNVSLVKPSFYVYS
RVKNLNSSRVPDLLV
>QNO76393.1 |envelope protein [Severe acute respiratory syndrome coronavirus 2]
MYSFVSEETGTLIVNSVLLFLAFVVFLLVTLAILTALRLCAYCCNIVNVSLVKPSFYVYS
RVKNLNSSRVPDLLV
>QNO76405.1 |envelope protein [Severe acute respiratory syndrome coronavirus 2]
MYSFVSEETGTLIVNSVLLFLAFVVFLLVTLAILTALRLCAYCCNIVNVSLVKPSFYVYS
RVKNLNSSRVPDLLV
>QNO76417.1 |envelope protein [Severe acute respiratory syndrome coronavirus 2]
MYSFVSEETGTLIVNSVLLFLAFVVFLLVTLAILTALRLCAYCCNIVNVSLVKPSFYVYS
RVKNLNSSRVPDLLV
>QNO76429.1 |envelope protein [Severe acute respiratory syndrome coronavirus 2]
MYSFVSEETGTLIVNSVLLFLAFVVFLLVTLAILTALRLCAYCCNIVNVSLVKPSFYVYS
RVKNLNSSRVPDLLV
>QNO76441.1 |envelope protein [Severe acute respiratory syndrome coronavirus 2]
MYSFVSEETGTLIVNSVLLFLAFVVFLLVTLAILTALRLCAYCCNIVNVSLVKPSFYVYS
RVKNLNSSRVPDLLV
>QNO76453.1 |envelope protein [Severe acute respiratory syndrome coronavirus 2]
MYSFVSEETGTLIVNSVLLFLAFVVFLLVTLAILTALRLCAYCCNIVNVSLVKPSFYVYS
RVKNLNSSRVPDLLV
>QNO76465.1 |envelope protein [Severe acute respiratory syndrome coronavirus 2]
MYSFVSEETGTLIVNSVLLFLAFVVFLLVTLAILTALRLCAYCCNIVNVSLVKPSFYVYS
RVKNLNSSRVPDLLV
>QNO76477.1 |envelope protein [Severe acute respiratory syndrome coronavirus 2]
MYSFVSEETGTLIVNSVLLFLAFVVFLLVTLAILTALRLCAYCCNIVNVSLVKPSFYVYS
RVKNLNSSRVPDLLV
>QNO76489.1 |envelope protein [Severe acute respiratory syndrome coronavirus 2]
MYSFVSEETGTLIVNSVLLFLAFVVFLLVTLAILTALRLCAYCCNIVNVSLVKPSFYVYS
RVKNLNSSRVPDLLV
>QNO76501.1 |envelope protein [Severe acute respiratory syndrome coronavirus 2]
MYSFVSEETGTLIVNSVLLFLAFVVFLLVTLAILTALRLCAYCCNIVNVSLVKPSFYVYS
RVKNLNSSRVPDLLV
>QNO76513.1 |envelope protein [Severe acute respiratory syndrome coronavirus 2]
MYSFVSEETGTLIVNSVLLFLAFVVFLLVTLAILTALRLCAYCCNIVNVSLVKPSFYVYS
RVKNLNSSRVPDLLV
>QNO76525.1 |envelope protein [Severe acute respiratory syndrome coronavirus 2]
MYSFVSEETGTLIVNSVLLFLAFVVFLLVTLAILTALRLCAYCCNIVNVSLVKPSFYVYS
RVKNLNSSRVPDLLV
>QNO76537.1 |envelope protein [Severe acute respiratory syndrome coronavirus 2]
MYSFVSEETGTLIVNSVLLFLAFVVFLLVTLAILTALRLCAYCCNIVNVSLVKPSFYVYS
RVKNLNSSRVPDLLV
>QNO76549.1 |envelope protein [Severe acute respiratory syndrome coronavirus 2]
MYSFVSEETGTLIVNSVLLFLAFVVFLLVTLAILTALRLCAYCCNIVNVSLVKPSFYVYS
RVKNLNSSRVPDLLV
>QNO76561.1 |envelope protein [Severe acute respiratory syndrome coronavirus 2]
MYSFVSEETGTLIVNSVLLFLAFVVFLLVTLAILTALRLCAYCCNIVNVSLVKPSFYVYS
RVKNLNSSRVPDLLV
>QNO76573.1 |envelope protein [Severe acute respiratory syndrome coronavirus 2]
MYSFVSEETGTLIVNSVLLFLAFVVFLLVTLAILTALRLCAYCCNIVNVSLVKPSFYVYS
RVKNLNSSRVPDLLV
>QNO76585.1 |envelope protein [Severe acute respiratory syndrome coronavirus 2]
MYSFVSEETGTLIVNSVLLFLAFVVFLLVTLAILTALRLCAYCCNIVNVSLVKPSFYVYS
RVKNLNSSRVPDLLV
>QNO76597.1 |envelope protein [Severe acute respiratory syndrome coronavirus 2]
MYSFVSEETGTLIVNSVLLFLAFVVFLLVTLAILTALRLCAYCCNIVNVSLVKPSFYVYS
RVKNLNSSRVPDLLV
>QNO76609.1 |envelope protein [Severe acute respiratory syndrome coronavirus 2]
MYSFVSEETGTLIVNSVLLFLAFVVFLLVTLAILTALRLCAYCCNIVNVSLVKPSFYVYS
RVKNLNSSRVPDLLV
>QNO76621.1 |envelope protein [Severe acute respiratory syndrome coronavirus 2]
MYSFVSEETGTLIVNSVLLFLAFVVFLLVTLAILTALRLCAYCCNIVNVSLVKPSFYVYS
RVKNLNSSRVPDLLV
>QNO76633.1 |envelope protein [Severe acute respiratory syndrome coronavirus 2]
MYSFVSEETGTLIVNSVLLFLAFVVFLLVTLAILTALRLCAYCCNIVNVSLVKPSFYVYS
RVKNLNSSRVPDLLV
>QNO76645.1 |envelope protein [Severe acute respiratory syndrome coronavirus 2]
MYSFVSEETGTLIVNSVLLFLAFVVFLLVTLAILTALRLCAYCCNIVNVSLVKPSFYVYS
RVKNLNSSRVPDLLV
>QNO76657.1 |envelope protein [Severe acute respiratory syndrome coronavirus 2]
MYSFVSEETGTLIVNSVLLFLAFVVFLLVTLAILTALRLCAYCCNIVNVSLVKPSFYVYS
RVKNLNSSRVPDLLV
>QNO76669.1 |envelope protein [Severe acute respiratory syndrome coronavirus 2]
MYSFVSEETGTLIVNSVLLFLAFVVFLLVTLAILTALRLCAYCCNIVNVSLVKPSFYVYS
RVKNLNSSRVPDLLV
>QNO76681.1 |envelope protein [Severe acute respiratory syndrome coronavirus 2]
MYSFVSEETGTLIVNSVLLFLAFVVFLLVTLAILTALRLCAYCCNIVNVSLVKPSFYVYS
RVKNLNSSRVPDLLV
>QNO76693.1 |envelope protein [Severe acute respiratory syndrome coronavirus 2]
MYSFVSEETGTLIVNSVLLFLAFVVFLLVTLAILTALRLCAYCCNIVNVSLVKPSFYVYS
RVKNLNSSRVPDLLV
>QNO76705.1 |envelope protein [Severe acute respiratory syndrome coronavirus 2]
MYSFVSEETGTLIVNSVLLFLAFVVFLLVTLAILTALRLCAYCCNIVNVSLVKPSFYVYS
RVKNLNSSRVPDLLV
>QNO76717.1 |envelope protein [Severe acute respiratory syndrome coronavirus 2]
MYSFVSEETGTLIVNSVLLFLAFVVFLLVTLAILTALRLCAYCCNIVNVSLVKPSFYVYS
RVKNLNSSRVPDLLV
>QNO76729.1 |envelope protein [Severe acute respiratory syndrome coronavirus 2]
MYSFVSEETGTLIVNSVLLFLAFVVFLLVTLAILTALRLCAYCCNIVNVSLVKPSFYVYS
RVKNLNSSRVPDLLV
>QNO76741.1 |envelope protein [Severe acute respiratory syndrome coronavirus 2]
MYSFVSEETGTLIVNSVLLFLAFVVFLLVTLAILTALRLCAYCCNIVNVSLVKPSFYVYS
RVKNLNSSRVPDLLV
>QNO76753.1 |envelope protein [Severe acute respiratory syndrome coronavirus 2]
MYSFVSEETGTLIVNSVLLFLAFVVFLLVTLAILTALRLCAYCCNIVNVSLVKPSFYVYS
RVKNLNSSRVPDLLV
>QNO76765.1 |envelope protein [Severe acute respiratory syndrome coronavirus 2]
MYSFVSEETGTLIVNSVLLFLAFVVFLLVTLAILTALRLCAYCCNIVNVSLVKPSFYVYS
RVKNLNSSRVPDLLV
>QNO76777.1 |envelope protein [Severe acute respiratory syndrome coronavirus 2]
MYSFVSEETGTLIVNSVLLFLAFVVFLLVTLAILTALRLCAYCCNIVNVSLVKPSFYVYS
RVKNLNSSRVPDLLV
>QNO76789.1 |envelope protein [Severe acute respiratory syndrome coronavirus 2]
MYSFVSEETGTLIVNSVLLFLAFVVFLLVTLAILTALRLCAYCCNIVNVSLVKPSFYVYS
RVKNLNSSRVPDLLV
>QNO76801.1 |envelope protein [Severe acute respiratory syndrome coronavirus 2]
MYSFVSEETGTLIVNSVLLFLAFVVFLLVTLAILTALRLCAYCCNIVNVSLVKPSFYVYS
RVKNLNSSRVPDLLV
>QNO76813.1 |envelope protein [Severe acute respiratory syndrome coronavirus 2]
MYSFVSEETGTLIVNSVLLFLAFVVFLLVTLAILTALRLCAYCCNIVNVSLVKPSFYVYS
RVKNLNSSRVPDLLV
>QNO76825.1 |envelope protein [Severe acute respiratory syndrome coronavirus 2]
MYSFVSEETGTLIVNSVLLFLAFVVFLLVTLAILTALRLCAYCCNIVNVSLVKPSFYVYS
RVKNLNSSRVPDLLV
>QNO76837.1 |envelope protein [Severe acute respiratory syndrome coronavirus 2]
MYSFVSEETGTLIVNSVLLFLAFVVFLLVTLAILTALRLCAYCCNIVNVSLVKPSFYVYS
RVKNLNSSRVPDLLV
>QNO76849.1 |envelope protein [Severe acute respiratory syndrome coronavirus 2]
MYSFVSEETGTLIVNSVLLFLAFVVFLLVTLAILTALRLCAYCCNIVNVSLVKPSFYVYS
RVKNLNSSRVPDLLV
>QNO76861.1 |envelope protein [Severe acute respiratory syndrome coronavirus 2]
MYSFVSEETGTLIVNSVLLFLAFVVFLLVTLAILTALRLCAYCCNIVNVSLVKPSFYVYS
RVKNLNSSRVPDLLV
>QNO76873.1 |envelope protein [Severe acute respiratory syndrome coronavirus 2]
MYSFVSEETGTLIVNSVLLFLAFVVFLLVTLAILTALRLCAYCCNIVNVSLVKPSFYVYS
RVKNLNSSRVPDLLV
>QNO76885.1 |envelope protein [Severe acute respiratory syndrome coronavirus 2]
MYSFVSEETGTLIVNSVLLFLAFVVFLLVTLAILTALRLCAYCCNIVNVSLVKPSFYVYS
RVKNLNSSRVPDLLV
>QNO76897.1 |envelope protein [Severe acute respiratory syndrome coronavirus 2]
MYSFVSEETGTLIVNSVLLFLAFVVFLLVTLAILTALRLCAYCCNIVNVSLVKPSFYVYS
RVKNLNSSRVPDLLV
>QNO76909.1 |envelope protein [Severe acute respiratory syndrome coronavirus 2]
MYSFVSEETGTLIVNSVLLFLAFVVFLLVTLAILTALRLCAYCCNIVNVSLVKPSFYVYS
RVKNLNSSRVPDLLV
>QNO76921.1 |envelope protein [Severe acute respiratory syndrome coronavirus 2]
MYSFVSEETGTLIVNSVLLFLAFVVFLLVTLAILTALRLCAYCCNIVNVSLVKPSFYVYS
RVKNLNSSRVPDLLV
>QNO76933.1 |envelope protein [Severe acute respiratory syndrome coronavirus 2]
MYSFVSEETGTLIVNSVLLFLAFVVFLLVTLAILTALRLCAYCCNIVNVSLVKPSFYVYS
RVKNLNSSRVPDLLV
>QNO76945.1 |envelope protein [Severe acute respiratory syndrome coronavirus 2]
MYSFVSEETGTLIVNSVLLFLAFVVFLLVTLAILTALRLCAYCCNIVNVSLVKPSFYVYS
RVKNLNSSRVPDLLV
>QNO76957.1 |envelope protein [Severe acute respiratory syndrome coronavirus 2]
MYSFVSEETGTLIVNSVLLFLAFVVFLLVTLAILTALRLCAYCCNIVNVSLVKPSFYVYS
RVKNLNSSRVPDLLV
>QNO76969.1 |envelope protein [Severe acute respiratory syndrome coronavirus 2]
MYSFVSEETGTLIVNSVLLFLAFVVFLLVTLAILTALRLCAYCCNIVNVSLVKPSFYVYS
RVKNLNSSRVPDLLV
>QNO76981.1 |envelope protein [Severe acute respiratory syndrome coronavirus 2]
MYSFVSEETGTLIVNSVLLFLAFVVFLLVTLAILTALRLCAYCCNIVNVSLVKPSFYVYS
RVKNLNSSRVPDLLV
>QNO76993.1 |envelope protein [Severe acute respiratory syndrome coronavirus 2]
MYSFVSEETGTLIVNSVLLFLAFVVFLLVTLAILTALRLCAYCCNIVNVSLVKPSFYVYS
RVKNLNSSRVPDLLV
>QNO77005.1 |envelope protein [Severe acute respiratory syndrome coronavirus 2]
MYSFVSEETGTLIVNSVLLFLAFVVFLLVTLAILTALRLCAYCCNIVNVSLVKPSFYVYS
RVKNLNSSRVPDLLV
>QNO77017.1 |envelope protein [Severe acute respiratory syndrome coronavirus 2]
MYSFVSEETGTLIVNSVLLFLAFVVFLLVTLAILTALRLCAYCCNIVNVSLVKPSFYVYS
RVKNLNSSRVPDLLV
>QNO77029.1 |envelope protein [Severe acute respiratory syndrome coronavirus 2]
MYSFVSEETGTLIVNSVLLFLAFVVFLLVTLAILTALRLCAYCCNIVNVSLVKPSFYVYS
RVKNLNSSRVPDLLV
>QNO77041.1 |envelope protein [Severe acute respiratory syndrome coronavirus 2]
MYSFVSEETGTLIVNSVLLFLAFVVFLLVTLAILTALRLCAYCCNIVNVSLVKPSFYVYS
RVKNLNSSRVPDLLV
>QNO77053.1 |envelope protein [Severe acute respiratory syndrome coronavirus 2]
MYSFVSEETGTLIVNSVLLFLAFVVFLLVTLAILTALRLCAYCCNIVNVSLVKPSFYVYS
RVKNLNSSRVPDLLV
>QNO77065.1 |envelope protein [Severe acute respiratory syndrome coronavirus 2]
MYSFVSEETGTLIVNSVLLFLAFVVFLLVTLAILTALRLCAYCCNIVNVSLVKPSFYVYS
RVKNLNSSRVPDLLV
>QNO77077.1 |envelope protein [Severe acute respiratory syndrome coronavirus 2]
MYSFVSEETGTLIVNSVLLFLAFVVFLLVTLAILTALRLCAYCCNIVNVSLVKPSFYVYS
RVKNLNSSRVPDLLV
>QNO77089.1 |envelope protein [Severe acute respiratory syndrome coronavirus 2]
MYSFVSEETGTLIVNSVLLFLAFVVFLLVTLAILTALRLCAYCCNIVNVSLVKPSFYVYS
RVKNLNSSRVPDLLV
>QNO77101.1 |envelope protein [Severe acute respiratory syndrome coronavirus 2]
MYSFVSEETGTLIVNSVLLFLAFVVFLLVTLAILTALRLCAYCCNIVNVSLVKPSFYVYS
RVKNLNSSRVPDLLV
>QNO77113.1 |envelope protein [Severe acute respiratory syndrome coronavirus 2]
MYSFVSEETGTLIVNSVLLFLAFVVFLLVTLAILTALRLCAYCCNIVNVSLVKPSFYVYS
RVKNLNSSRVPDLLV
>QNO77125.1 |envelope protein [Severe acute respiratory syndrome coronavirus 2]
MYSFVSEETGTLIVNSVLLFLAFVVFLLVTLAILTALRLCAYCCNIVNVSLVKPSFYVYS
RVKNLNSSRVPDLLV
>QNO77137.1 |envelope protein [Severe acute respiratory syndrome coronavirus 2]
MYSFVSEETGTLIVNSVLLFLAFVVFLLVTLAILTALRLCAYCCNIVNVSLVKPSFYVYS
RVKNLNSSRVPDLLV
>QNO77149.1 |envelope protein [Severe acute respiratory syndrome coronavirus 2]
MYSFVSEETGTLIVNSVLLFLAFVVFLLVTLAILTALRLCAYCCNIVNVSLVKPSFYVYS
RVKNLNSSRVPDLLV
>QNO77161.1 |envelope protein [Severe acute respiratory syndrome coronavirus 2]
MYSFVSEETGTLIVNSVLLFLAFVVFLLVTLAILTALRLCAYCCNIVNVSLVKPSFYVYS
RVKNLNSSRVPDLLV
>QNO77173.1 |envelope protein [Severe acute respiratory syndrome coronavirus 2]
MYSFVSEETGTLIVNSVLLFLAFVVFLLVTLAILTALRLCAYCCNIVNVSLVKPSFYVYS
RVKNLNSSRVPDLLV
>QNO77185.1 |envelope protein [Severe acute respiratory syndrome coronavirus 2]
MYSFVSEETGTLIVNSVLLFLAFVVFLLVTLAILTALRLCAYCCNIVNVSLVKPSFYVYS
RVKNLNSSRVPDLLV
>QNO77197.1 |envelope protein [Severe acute respiratory syndrome coronavirus 2]
MYSFVSEETGTLIVNSVLLFLAFVVFLLVTLAILTALRLCAYCCNIVNVSLVKPSFYVYS
RVKNLNSSRVPDLLV
>QNO77209.1 |envelope protein [Severe acute respiratory syndrome coronavirus 2]
MYSFVSEETGTLIVNSVLLFLAFVVFLLVTLAILTALRLCAYCCNIVNVSLVKPSFYVYS
RVKNLNSSRVPDLLV
>QNO77221.1 |envelope protein [Severe acute respiratory syndrome coronavirus 2]
MYSFVSEETGTLIVNSVLLFLAFVVFLLVTLAILTALRLCAYCCNIVNVSLVKPSFYVYS
RVKNLNSSRVPDLLV
>QNO77233.1 |envelope protein [Severe acute respiratory syndrome coronavirus 2]
MYSFVSEETGTLIVNSVLLFLAFVVFLLVTLAILTALRLCAYCCNIVNVSLVKPSFYVYS
RVKNLNSSRVPDLLV
>QNO77245.1 |envelope protein [Severe acute respiratory syndrome coronavirus 2]
MYSFVSEETGTLIVNSVLLFLAFVVFLLVTLAILTALRLCAYCCNIVNVSLVKPSFYVYS
RVKNLNSSRVPDLLV
>QNO77257.1 |envelope protein [Severe acute respiratory syndrome coronavirus 2]
MYSFVSEETGTLIVNSVLLFLAFVVFLLVTLAILTALRLCAYCCNIVNVSLVKPSFYVYS
RVKNLNSSRVPDLLV
>QNO77269.1 |envelope protein [Severe acute respiratory syndrome coronavirus 2]
MYSFVSEETGTLIVNSVLLFLAFVVFLLVTLAILTALRLCAYCCNIVNVSLVKPSFYVYS
RVKNLNSSRVPDLLV
>QNO77281.1 |envelope protein [Severe acute respiratory syndrome coronavirus 2]
MYSFVSEETGTLIVNSVLLFLAFVVFLLVTLAILTALRLCAYCCNIVNVSLVKPSFYVYS
RVKNLNSSRVPDLLV
>QNO77293.1 |envelope protein [Severe acute respiratory syndrome coronavirus 2]
MYSFVSEETGTLIVNSVLLFLAFVVFLLVTLAILTALRLCAYCCNIVNVSLVKPSFYVYS
RVKNLNSSRVPDLLV
>QNO77305.1 |envelope protein [Severe acute respiratory syndrome coronavirus 2]
MYSFVSEETGTLIVNSVLLFLAFVVFLLVTLAILTALRLCAYCCNIVNVSLVKPSFYVYS
RVKNLNSSRVPDLLV
>QNO77317.1 |envelope protein [Severe acute respiratory syndrome coronavirus 2]
MYSFVSEETGTLIVNSVLLFLAFVVFLLVTLAILTALRLCAYCCNIVNVSLVKPSFYVYS
RVKNLNSSRVPDLLV
>QNO77329.1 |envelope protein [Severe acute respiratory syndrome coronavirus 2]
MYSFVSEETGTLIVNSVLLFLAFVVFLLVTLAILTALRLCAYCCNIVNVSLVKPSFYVYS
RVKNLNSSRVPDLLV
>QNO77341.1 |envelope protein [Severe acute respiratory syndrome coronavirus 2]
MYSFVSEETGTLIVNSVLLFLAFVVFLLVTLAILTALRLCAYCCNIVNVSLVKPSFYVYS
RVKNLNSSRVPDLLV
>QNO77353.1 |envelope protein [Severe acute respiratory syndrome coronavirus 2]
MYSFVSEETGTLIVNSVLLFLAFVVFLLVTLAILTALRLCAYCCNIVNVSLVKPSFYVYS
RVKNLNSSRVPDLLV
>QNO77365.1 |envelope protein [Severe acute respiratory syndrome coronavirus 2]
MYSFVSEETGTLIVNSVLLFLAFVVFLLVTLAILTALRLCAYCCNIVNVSLVKPSFYVYS
RVKNLNSSRVPDLLV
>QNO77377.1 |envelope protein [Severe acute respiratory syndrome coronavirus 2]
MYSFVSEETGTLIVNSVLLFLAFVVFLLVTLAILTALRLCAYCCNIVNVSLVKPSFYVYS
RVKNLNSSRVPDLLV
>QNO77389.1 |envelope protein [Severe acute respiratory syndrome coronavirus 2]
MYSFVSEETGTLIVNSVLLFLAFVVFLLVTLAILTALRLCAYCCNIVNVSLVKPSFYVYS
RVKNLNSSRVPDLLV
>QNO77401.1 |envelope protein [Severe acute respiratory syndrome coronavirus 2]
MYSFVSEETGTLIVNSVLLFLAFVVFLLVTLAILTALRLCAYCCNIVNVSLVKPSFYVYS
RVKNLNSSRVPDLLV
>QNO77413.1 |envelope protein [Severe acute respiratory syndrome coronavirus 2]
MYSFVSEETGTLIVNSVLLFLAFVVFLLVTLAILTALRLCAYCCNIVNVSLVKPSFYVYS
RVKNLNSSRVPDLLV
>QNO77425.1 |envelope protein [Severe acute respiratory syndrome coronavirus 2]
MYSFVSEETGTLIVNSVLLFLAFVVFLLVTLAILTALRLCAYCCNIVNVSLVKPSFYVYS
RVKNLNSSRVPDLLV
>QNO77437.1 |envelope protein [Severe acute respiratory syndrome coronavirus 2]
MYSFVSEETGTLIVNSVLLFLAFVVFLLVTLAILTALRLCAYCCNIVNVSLVKPSFYVYS
RVKNLNSSRVPDLLV
>QNO77449.1 |envelope protein [Severe acute respiratory syndrome coronavirus 2]
MYSFVSEETGTLIVNSVLLFLAFVVFLLVTLAILTALRLCAYCCNIVNVSLVKPSFYVYS
RVKNLNSSRVPDLLV
>QNO77461.1 |envelope protein [Severe acute respiratory syndrome coronavirus 2]
MYSFVSEETGTLIVNSVLLFLAFVVFLLVTLAILTALRLCAYCCNIVNVSLVKPSFYVYS
RVKNLNSSRVPDLLV
>QNO77473.1 |envelope protein [Severe acute respiratory syndrome coronavirus 2]
MYSFVSEETGTLIVNSVLLFLAFVVFLLVTLAILTALRLCAYCCNIVNVSLVKPSFYVYS
RVKNLNSSRVPDLLV
>QNO77485.1 |envelope protein [Severe acute respiratory syndrome coronavirus 2]
MYSFVSEETGTLIVNSVLLFLAFVVFLLVTLAILTALRLCAYCCNIVNVSLVKPSFYVYS
RVKNLNSSRVPDLLV
>QNO77497.1 |envelope protein [Severe acute respiratory syndrome coronavirus 2]
MYSFVSEETGTLIVNSVLLFLAFVVFLLVTLAILTALRLCAYCCNIVNVSLVKPSFYVYS
RVKNLNSSRVPDLLV
>QNO77509.1 |envelope protein [Severe acute respiratory syndrome coronavirus 2]
MYSFVSEETGTLIVNSVLLFLAFVVFLLVTLAILTALRLCAYCCNIVNVSLVKPSFYVYS
RVKNLNSSRVPDLLV
>QNO77521.1 |envelope protein [Severe acute respiratory syndrome coronavirus 2]
MYSFVSEETGTLIVNSVLLFLAFVVFLLVTLAILTALRLCAYCCNIVNVSLVKPSFYVYS
RVKNLNSSRVPDLLV
>QNO77533.1 |envelope protein [Severe acute respiratory syndrome coronavirus 2]
MYSFVSEETGTLIVNSVLLFLAFVVFLLVTLAILTALRLCAYCCNIVNVSLVKPSFYVYS
RVKNLNSSRVPDLLV
>QNO77545.1 |envelope protein [Severe acute respiratory syndrome coronavirus 2]
MYSFVSEETGTLIVNSVLLFLAFVVFLLVTLAILTALRLCAYCCNIVNVSLVKPSFYVYS
RVKNLNSSRVPDLLV
>QNO77557.1 |envelope protein [Severe acute respiratory syndrome coronavirus 2]
MYSFVSEETGTLIVNSVLLFLAFVVFLLVTLAILTALRLCAYCCNIVNVSLVKPSFYVYS
RVKNLNSSRVPDLLV
>QNO77569.1 |envelope protein [Severe acute respiratory syndrome coronavirus 2]
MYSFVSEETGTLIVNSVLLFLAFVVFLLVTLAILTALRLCAYCCNIVNVSLVKPSFYVYS
RVKNLNSSRVPDLLV
>QNO77581.1 |envelope protein [Severe acute respiratory syndrome coronavirus 2]
MYSFVSEETGTLIVNSVLLFLAFVVFLLVTLAILTALRLCAYCCNIVNVSLVKPSFYVYS
RVKNLNSSRVPDLLV
>QNO77593.1 |envelope protein [Severe acute respiratory syndrome coronavirus 2]
MYSFVSEETGTLIVNSVLLFLAFVVFLLVTLAILTALRLCAYCCNIVNVSLVKPSFYVYS
RVKNLNSSRVPDLLV
>QNO77605.1 |envelope protein [Severe acute respiratory syndrome coronavirus 2]
MYSFVSEETGTLIVNSVLLFLAFVVFLLVTLAILTALRLCAYCCNIVNVSLVKPSFYVYS
RVKNLNSSRVPDLLV
>QNO77617.1 |envelope protein [Severe acute respiratory syndrome coronavirus 2]
MYSFVSEETGTLIVNSVLLFLAFVVFLLVTLAILTALRLCAYCCNIVNVSLVKPSFYVYS
RVKNLNSSRVPDLLV
>QNO77629.1 |envelope protein [Severe acute respiratory syndrome coronavirus 2]
MYSFVSEETGTLIVNSVLLFLAFVVFLLVTLAILTALRLCAYCCNIVNVSLVKPSFYVYS
RVKNLNSSRVPDLLV
>QNO77641.1 |envelope protein [Severe acute respiratory syndrome coronavirus 2]
MYSFVSEETGTLIVNSVLLFLAFVVFLLVTLAILTALRLCAYCCNIVNVSLVKPSFYVYS
RVKNLNSSRVPDLLV
>QNO77653.1 |envelope protein [Severe acute respiratory syndrome coronavirus 2]
MYSFVSEETGTLIVNSVLLFLAFVVFLLVTLAILTALRLCAYCCNIVNVSLVKPSFYVYS
RVKNLNSSRVPDLLV
>QNO77665.1 |envelope protein [Severe acute respiratory syndrome coronavirus 2]
MYSFVSEETGTLIVNSVLLFLAFVVFLLVTLAILTALRLCAYCCNIVNVSLVKPSFYVYS
RVKNLNSSRVPDLLV
>QNO77677.1 |envelope protein [Severe acute respiratory syndrome coronavirus 2]
MYSFVSEETGTLIVNSVLLFLAFVVFLLVTLAILTALRLCAYCCNIVNVSLVKPSFYVYS
RVKNLNSSRVPDLLV
>QNO77689.1 |envelope protein [Severe acute respiratory syndrome coronavirus 2]
MYSFVSEETGTLIVNSVLLFLAFVVFLLVTLAILTALRLCAYCCNIVNVSLVKPSFYVYS
RVKNLNSSRVPDLLV
>QNO77701.1 |envelope protein [Severe acute respiratory syndrome coronavirus 2]
MYSFVSEETGTLIVNSVLLFLAFVVFLLVTLAILTALRLCAYCCNIVNVSLVKPSFYVYS
RVKNLNSSRVPDLLV
>QNO77713.1 |envelope protein [Severe acute respiratory syndrome coronavirus 2]
MYSFVSEETGTLIVNSVLLFLAFVVFLLVTLAILTALRLCAYCCNIVNVSLVKPSFYVYS
RVKNLNSSRVPDLLV
>QNO77725.1 |envelope protein [Severe acute respiratory syndrome coronavirus 2]
MYSFVSEETGTLIVNSVLLFLAFVVFLLVTLAILTALRLCAYCCNIVNVSLVKPSFYVYS
RVKNLNSSRVPDLLV
>QNO77737.1 |envelope protein [Severe acute respiratory syndrome coronavirus 2]
MYSFVSEETGTLIVNSVLLFLAFVVFLLVTLAILTALRLCAYCCNIVNVSLVKPSFYVYS
RVKNLNSSRVPDLLV
>QNO77749.1 |envelope protein [Severe acute respiratory syndrome coronavirus 2]
MYSFVSEETGTLIVNSVLLFLAFVVFLLVTLAILTALRLCAYCCNIVNVSLVKPSFYVYS
RVKNLNSSRVPDLLV
>QNO77761.1 |envelope protein [Severe acute respiratory syndrome coronavirus 2]
MYSFVSEETGTLIVNSVLLFLAFVVFLLVTLAILTALRLCAYCCNIVNVSLVKPSFYVYS
RVKNLNSSRVPDLLV
>QNO77773.1 |envelope protein [Severe acute respiratory syndrome coronavirus 2]
MYSFVSEETGTLIVNSVLLFLAFVVFLLVTLAILTALRLCAYCCNIVNVSLVKPSFYVYS
RVKNLNSSRVPDLLV
>QNO77785.1 |envelope protein [Severe acute respiratory syndrome coronavirus 2]
MYSFVSEETGTLIVNSVLLFLAFVVFLLVTLAILTALRLCAYCCNIVNVSLVKPSFYVYS
RVKNLNSSRVPDLLV
>QNO77797.1 |envelope protein [Severe acute respiratory syndrome coronavirus 2]
MYSFVSEETGTLIVNSVLLFLAFVVFLLVTLAILTALRLCAYCCNIVNVSLVKPSFYVYS
RVKNLNSSRVPDLLV
>QNO77809.1 |envelope protein [Severe acute respiratory syndrome coronavirus 2]
MYSFVSEETGTLIVNSVLLFLAFVVFLLVTLAILTALRLCAYCCNIVNVSLVKPSFYVYS
RVKNLNSSRVPDLLV
>QNO77821.1 |envelope protein [Severe acute respiratory syndrome coronavirus 2]
MYSFVSEETGTLIVNSVLLFLAFVVFLLVTLAILTALRLCAYCCNIVNVSLVKPSFYVYS
RVKNLNSSRVPDLLV
>QNO77833.1 |envelope protein [Severe acute respiratory syndrome coronavirus 2]
MYSFVSEETGTLIVNSVLLFLAFVVFLLVTLAILTALRLCAYCCNIVNVSLVKPSFYVYS
RVKNLNSSRVPDLLV
>QNO77845.1 |envelope protein [Severe acute respiratory syndrome coronavirus 2]
MYSFVSEETGTLIVNSVLLFLAFVVFLLVTLAILTALRLCAYCCNIVNVSLVKPSFYVYS
RVKNLNSSRVPDLLV
>QNO77857.1 |envelope protein [Severe acute respiratory syndrome coronavirus 2]
MYSFVSEETGTLIVNSVLLFLAFVVFLLVTLAILTALRLCAYCCNIVNVSLVKPSFYVYS
RVKNLNSSRVPDLLV
>QNO77869.1 |envelope protein [Severe acute respiratory syndrome coronavirus 2]
MYSFVSEETGTLIVNSVLLFLAFVVFLLVTLAILTALRLCAYCCNIVNVSLVKPSFYVYS
RVKNLNSSRVPDLLV
>QNO77881.1 |envelope protein [Severe acute respiratory syndrome coronavirus 2]
MYSFVSEETGTLIVNSVLLFLAFVVFLLVTLAILTALRLCAYCCNIVNVSLVKPSFYVYS
RVKNLNSSRVPDLLV
>QNO77893.1 |envelope protein [Severe acute respiratory syndrome coronavirus 2]
MYSFVSEETGTLIVNSVLLFLAFVVFLLVTLAILTALRLCAYCCNIVNVSLVKPSFYVYS
RVKNLNSSRVPDLLV
>QNO77905.1 |envelope protein [Severe acute respiratory syndrome coronavirus 2]
MYSFVSEETGTLIVNSVLLFLAFVVFLLVTLAILTALRLCAYCCNIVNVSLVKPSFYVYS
RVKNLNSSRVPDLLV
>QNO77917.1 |envelope protein [Severe acute respiratory syndrome coronavirus 2]
MYSFVSEETGTLIVNSVLLFLAFVVFLLVTLAILTALRLCAYCCNIVNVSLVKPSFYVYS
RVKNLNSSRVPDLLV
>QNO77929.1 |envelope protein [Severe acute respiratory syndrome coronavirus 2]
MYSFVSEETGTLIVNSVLLFLAFVVFLLVTLAILTALRLCAYCCNIVNVSLVKPSFYVYS
RVKNLNSSRVPDLLV
>QNO77941.1 |envelope protein [Severe acute respiratory syndrome coronavirus 2]
MYSFVSEETGTLIVNSVLLFLAFVVFLLVTLAILTALRLCAYCCNIVNVSLVKPSFYVYS
RVKNLNSSRVPDLLV
>QNO77953.1 |envelope protein [Severe acute respiratory syndrome coronavirus 2]
MYSFVSEETGTLIVNSVLLFLAFVVFLLVTLAILTALRLCAYCCNIVNVSLVKPSFYVYS
RVKNLNSSRVPDLLV
>QNO77965.1 |envelope protein [Severe acute respiratory syndrome coronavirus 2]
MYSFVSEETGTLIVNSVLLFLAFVVFLLVTLAILTALRLCAYCCNIVNVSLVKPSFYVYS
RVKNLNSSRVPDLLV
>QNO77977.1 |envelope protein [Severe acute respiratory syndrome coronavirus 2]
MYSFVSEETGTLIVNSVLLFLAFVVFLLVTLAILTALRLCAYCCNIVNVSLVKPSFYVYS
RVKNLNSSRVPDLLV
>QNO77989.1 |envelope protein [Severe acute respiratory syndrome coronavirus 2]
MYSFVSEETGTLIVNSVLLFLAFVVFLLVTLAILTALRLCAYCCNIVNVSLVKPSFYVYS
RVKNLNSSRVPDLLV
>QNO78001.1 |envelope protein [Severe acute respiratory syndrome coronavirus 2]
MYSFVSEETGTLIVNSVLLFLAFVVFLLVTLAILTALRLCAYCCNIVNVSLVKPSFYVYS
RVKNLNSSRVPDLLV
>QNO78013.1 |envelope protein [Severe acute respiratory syndrome coronavirus 2]
MYSFVSEETGTLIVNSVLLFLAFVVFLLVTLAILTALRLCAYCCNIVNVSLVKPSFYVYS
RVKNLNSSRVPDLLV
>QNO78025.1 |envelope protein [Severe acute respiratory syndrome coronavirus 2]
MYSFVSEETGTLIVNSVLLFLAFVVFLLVTLAILTALRLCAYCCNIVNVSLVKPSFYVYS
RVKNLNSSRVPDLLV
>QNO78037.1 |envelope protein [Severe acute respiratory syndrome coronavirus 2]
MYSFVSEETGTLIVNSVLLFLAFVVFLLVTLAILTALRLCAYCCNIVNVSLVKPSFYVYS
RVKNLNSSRVPDLLV
>QNO78049.1 |envelope protein [Severe acute respiratory syndrome coronavirus 2]
MYSFVSEETGTLIVNSVLLFLAFVVFLLVTLAILTALRLCAYCCNIVNVSLVKPSFYVYS
RVKNLNSSRVPDLLV
>QNO78061.1 |envelope protein [Severe acute respiratory syndrome coronavirus 2]
MYSFVSEETGTLIVNSVLLFLAFVVFLLVTLAILTALRLCAYCCNIVNVSLVKPSFYVYS
RVKNLNSSRVPDLLV
>QNO78073.1 |envelope protein [Severe acute respiratory syndrome coronavirus 2]
MYSFVSEETGTLIVNSVLLFLAFVVFLLVTLAILTALRLCAYCCNIVNVSLVKPSFYVYS
RVKNLNSSRVPDLLV
>QNO78085.1 |envelope protein [Severe acute respiratory syndrome coronavirus 2]
MYSFVSEETGTLIVNSVLLFLAFVVFLLVTLAILTALRLCAYCCNIVNVSLVKPSFYVYS
RVKNLNSSRVPDLLV
>QNO78097.1 |envelope protein [Severe acute respiratory syndrome coronavirus 2]
MYSFVSEETGTLIVNSVLLFLAFVVFLLVTLAILTALRLCAYCCNIVNVSLVKPSFYVYS
RVKNLNSSRVPDLLV
>QNO78109.1 |envelope protein [Severe acute respiratory syndrome coronavirus 2]
MYSFVSEETGTLIVNSVLLFLAFVVFLLVTLAILTALRLCAYCCNIVNVSLVKPSFYVYS
RVKNLNSSRVPDLLV
>QNO78121.1 |envelope protein [Severe acute respiratory syndrome coronavirus 2]
MYSFVSEETGTLIVNSVLLFLAFVVFLLVTLAILTALRLCAYCCNIVNVSLVKPSFYVYS
RVKNLNSSRVPDLLV
>QNO78133.1 |envelope protein [Severe acute respiratory syndrome coronavirus 2]
MYSFVSEETGTLIVNSVLLFLAFVVFLLVTLAILTALRLCAYCCNIVNVSLVKPSFYVYS
RVKNLNSSRVPDLLV
>QNO78145.1 |envelope protein [Severe acute respiratory syndrome coronavirus 2]
MYSFVSEETGTLIVNSVLLFLAFVVFLLVTLAILTALRLCAYCCNIVNVSLVKPSFYVYS
RVKNLNSSRVPDLLV
>QNO78157.1 |envelope protein [Severe acute respiratory syndrome coronavirus 2]
MYSFVSEETGTLIVNSVLLFLAFVVFLLVTLAILTALRLCAYCCNIVNVSLVKPSFYVYS
RVKNLNSSRVPDLLV
>QNO78169.1 |envelope protein [Severe acute respiratory syndrome coronavirus 2]
MYSFVSEETGTLIVNSVLLFLAFVVFLLVTLAILTALRLCAYCCNIVNVSLVKPSFYVYS
RVKNLNSSRVPDLLV
>QNO78181.1 |envelope protein [Severe acute respiratory syndrome coronavirus 2]
MYSFVSEETGTLIVNSVLLFLAFVVFLLVTLAILTALRLCAYCCNIVNVSLVKPSFYVYS
RVKNLNSSRVPDLLV
>QNO78193.1 |envelope protein [Severe acute respiratory syndrome coronavirus 2]
MYSFVSEETGTLIVNSVLLFLAFVVFLLVTLAILTALRLCAYCCNIVNVSLVKPSFYVYS
RVKNLNSSRVPDLLV
>QNO78205.1 |envelope protein [Severe acute respiratory syndrome coronavirus 2]
MYSFVSEETGTLIVNSVLLFLAFVVFLLVTLAILTALRLCAYCCNIVNVSLVKPSFYVYS
RVKNLNSSRVPDLLV
>QNO78217.1 |envelope protein [Severe acute respiratory syndrome coronavirus 2]
MYSFVSEETGTLIVNSVLLFLAFVVFLLVTLAILTALRLCAYCCNIVNVSLVKPSFYVYS
RVKNLNSSRVPDLLV
>QNO78229.1 |envelope protein [Severe acute respiratory syndrome coronavirus 2]
MYSFVSEETGTLIVNSVLLFLAFVVFLLVTLAILTALRLCAYCCNIVNVSLVKPSFYVYS
RVKNLNSSRVPDLLV
>QNO78241.1 |envelope protein [Severe acute respiratory syndrome coronavirus 2]
MYSFVSEETGTLIVNSVLLFLAFVVFLLVTLAILTALRLCAYCCNIVNVSLVKPSFYVYS
RVKNLNSSRVPDLLV
>QNO78253.1 |envelope protein [Severe acute respiratory syndrome coronavirus 2]
MYSFVSEETGTLIVNSVLLFLAFVVFLLVTLAILTALRLCAYCCNIVNVSLVKPSFYVYS
RVKNLNSSRVPDLLV
>QNO78265.1 |envelope protein [Severe acute respiratory syndrome coronavirus 2]
MYSFVSEETGTLIVNSVLLFLAFVVFLLVTLAILTALRLCAYCCNIVNVSLVKPSFYVYS
RVKNLNSSRVPDLLV
>QNO78277.1 |envelope protein [Severe acute respiratory syndrome coronavirus 2]
MYSFVSEETGTLIVNSVLLFLAFVVFLLVTLAILTALRLCAYCCNIVNVSLVKPSFYVYS
RVKNLNSSRVPDLLV
>QNO78289.1 |envelope protein [Severe acute respiratory syndrome coronavirus 2]
MYSFVSEETGTLIVNSVLLFLAFVVFLLVTLAILTALRLCAYCCNIVNVSLVKPSFYVYS
RVKNLNSSRVPDLLV
>QNO78301.1 |envelope protein [Severe acute respiratory syndrome coronavirus 2]
MYSFVSEETGTLIVNSVLLFLAFVVFLLVTLAILTALRLCAYCCNIVNVSLVKPSFYVYS
RVKNLNSSRVPDLLV
>QNO78313.1 |envelope protein [Severe acute respiratory syndrome coronavirus 2]
MYSFVSEETGTLIVNSVLLFLAFVVFLLVTLAILTALRLCAYCCNIVNVSLVKPSFYVYS
RVKNLNSSRVPDLLV
>QNO78325.1 |envelope protein [Severe acute respiratory syndrome coronavirus 2]
MYSFVSEETGTLIVNSVLLFLAFVVFLLVTLAILTALRLCAYCCNIVNVSLVKPSFYVYS
RVKNLNSSRVPDLLV
>QNO78337.1 |envelope protein [Severe acute respiratory syndrome coronavirus 2]
MYSFVSEETGTLIVNSVLLFLAFVVFLLVTLAILTALRLCAYCCNIVNVSLVKPSFYVYS
RVKNLNSSRVPDLLV
>QNO78349.1 |envelope protein [Severe acute respiratory syndrome coronavirus 2]
MYSFVSEETGTLIVNSVLLFLAFVVFLLVTLAILTALRLCAYCCNIVNVSLVKPSFYVYS
RVKNLNSSRVPDLLV
>QNO78361.1 |envelope protein [Severe acute respiratory syndrome coronavirus 2]
MYSFVSEETGTLIVNSVLLFLAFVVFLLVTLAILTALRLCAYCCNIVNVSLVKPSFYVYS
RVKNLNSSRVPDLLV
>QNO78373.1 |envelope protein [Severe acute respiratory syndrome coronavirus 2]
MYSFVSEETGTLIVNSVLLFLAFVVFLLVTLAILTALRLCAYCCNIVNVSLVKPSFYVYS
RVKNLNSSRVPDLLV
>QNO78385.1 |envelope protein [Severe acute respiratory syndrome coronavirus 2]
MYSFVSEETGTLIVNSVLLFLAFVVFLLVTLAILTALRLCAYCCNIVNVSLVKPSFYVYS
RVKNLNSSRVPDLLV
>QNO78397.1 |envelope protein [Severe acute respiratory syndrome coronavirus 2]
MYSFVSEETGTLIVNSVLLFLAFVVFLLVTLAILTALRLCAYCCNIVNVSLVKPSFYVYS
RVKNLNSSRVPDLLV
>QNO78409.1 |envelope protein [Severe acute respiratory syndrome coronavirus 2]
MYSFVSEETGTLIVNSVLLFLAFVVFLLVTLAILTALRLCAYCCNIVNVSLVKPSFYVYS
RVKNLNSSRVPDLLV
>QNO78421.1 |envelope protein [Severe acute respiratory syndrome coronavirus 2]
MYSFVSEETGTLIVNSVLLFLAFVVFLLVTLAILTALRLCAYCCNIVNVSLVKPSFYVYS
RVKNLNSSRVPDLLV
>QNO78433.1 |envelope protein [Severe acute respiratory syndrome coronavirus 2]
MYSFVSEETGTLIVNSVLLFLAFVVFLLVTLAILTALRLCAYCCNIVNVSLVKPSFYVYS
RVKNLNSSRVPDLLV
>QNO78445.1 |envelope protein [Severe acute respiratory syndrome coronavirus 2]
MYSFVSEETGTLIVNSVLLFLAFVVFLLVTLAILTALRLCAYCCNIVNVSLVKPSFYVYS
RVKNLNSSRVPDLLV
>QNO78457.1 |envelope protein [Severe acute respiratory syndrome coronavirus 2]
MYSFVSEETGTLIVNSVLLFLAFVVFLLVTLAILTALRLCAYCCNIVNVSLVKPSFYVYS
RVKNLNSSRVPDLLV
>QNO78469.1 |envelope protein [Severe acute respiratory syndrome coronavirus 2]
MYSFVSEETGTLIVNSVLLFLAFVVFLLVTLAILTALRLCAYCCNIVNVSLVKPSFYVYS
RVKNLNSSRVPDLLV
>QNO78481.1 |envelope protein [Severe acute respiratory syndrome coronavirus 2]
MYSFVSEETGTLIVNSVLLFLAFVVFLLVTLAILTALRLCAYCCNIVNVSLVKPSFYVYS
RVKNLNSSRVPDLLV
>QNO78493.1 |envelope protein [Severe acute respiratory syndrome coronavirus 2]
MYSFVSEETGTLIVNSVLLFLAFVVFLLVTLAILTALRLCAYCCNIVNVSLVKPSFYVYS
RVKNLNSSRVPDLLV
>QNO78505.1 |envelope protein [Severe acute respiratory syndrome coronavirus 2]
MYSFVSEETGTLIVNSVLLFLAFVVFLLVTLAILTALRLCAYCCNIVNVSLVKPSFYVYS
RVKNLNSSRVPDLLV
>QNO78517.1 |envelope protein [Severe acute respiratory syndrome coronavirus 2]
MYSFVSEETGTLIVNSVLLFLAFVVFLLVTLAILTALRLCAYCCNIVNVSLVKPSFYVYS
RVKNLNSSRVPDLLV
>QNO78529.1 |envelope protein [Severe acute respiratory syndrome coronavirus 2]
MYSFVSEETGTLIVNSVLLFLAFVVFLLVTLAILTALRLCAYCCNIVNVSLVKPSFYVYS
RVKNLNSSRVPDLLV
>QNO78541.1 |envelope protein [Severe acute respiratory syndrome coronavirus 2]
MYSFVSEETGTLIVNSVLLFLAFVVFLLVTLAILTALRLCAYCCNIVNVSLVKPSFYVYS
RVKNLNSSRVPDLLV
>QNO78553.1 |envelope protein [Severe acute respiratory syndrome coronavirus 2]
MYSFVSEETGTLIVNSVLLFLAFVVFLLVTLAILTALRLCAYCCNIVNVSLVKPSFYVYS
RVKNLNSSRVPDLLV
>QNO78565.1 |envelope protein [Severe acute respiratory syndrome coronavirus 2]
MYSFVSEETGTLIVNSVLLFLAFVVFLLVTLAILTALRLCAYCCNIVNVSLVKPSFYVYS
RVKNLNSSRVPDLLV
>QNO78577.1 |envelope protein [Severe acute respiratory syndrome coronavirus 2]
MYSFVSEETGTLIVNSVLLFLAFVVFLLVTLAILTALRLCAYCCNIVNVSLVKPSFYVYS
RVKNLNSSRVPDLLV
>QNO78589.1 |envelope protein [Severe acute respiratory syndrome coronavirus 2]
MYSFVSEETGTLIVNSVLLFLAFVVFLLVTLAILTALRLCAYCCNIVNVSLVKPSFYVYS
RVKNLNSSRVPDLLV
>QNO78601.1 |envelope protein [Severe acute respiratory syndrome coronavirus 2]
MYSFVSEETGTLIVNSVLLFLAFVVFLLVTLAILTALRLCAYCCNIVNVSLVKPSFYVYS
RVKNLNSSRVPDLLV
>QNO78613.1 |envelope protein [Severe acute respiratory syndrome coronavirus 2]
MYSFVSEETGTLIVNSVLLFLAFVVFLLVTLAILTALRLCAYCCNIVNVSLVKPSFYVYS
RVKNLNSSRVPDLLV
>QNO78625.1 |envelope protein [Severe acute respiratory syndrome coronavirus 2]
MYSFVSEETGTLIVNSVLLFLAFVVFLLVTLAILTALRLCAYCCNIVNVSLVKPSFYVYS
RVKNLNSSRVPDLLV
>QNO78637.1 |envelope protein [Severe acute respiratory syndrome coronavirus 2]
MYSFVSEETGTLIVNSVLLFLAFVVFLLVTLAILTALRLCAYCCNIVNVSLVKPSFYVYS
RVKNLNSSRVPDLLV
>QNO78649.1 |envelope protein [Severe acute respiratory syndrome coronavirus 2]
MYSFVSEETGTLIVNSVLLFLAFVVFLLVTLAILTALRLCAYCCNIVNVSLVKPSFYVYS
RVKNLNSSRVPDLLV
>QNO78661.1 |envelope protein [Severe acute respiratory syndrome coronavirus 2]
MYSFVSEETGTLIVNSVLLFLAFVVFLLVTLAILTALRLCAYCCNIVNVSLVKPSFYVYS
RVKNLNSSRVPDLLV
>QNO78673.1 |envelope protein [Severe acute respiratory syndrome coronavirus 2]
MYSFVSEETGTLIVNSVLLFLAFVVFLLVTLAILTALRLCAYCCNIVNVSLVKPSFYVYS
RVKNLNSSRVPDLLV
>QNO78685.1 |envelope protein [Severe acute respiratory syndrome coronavirus 2]
MYSFVSEETGTLIVNSVLLFLAFVVFLLVTLAILTALRLCAYCCNIVNVSLVKPSFYVYS
RVKNLNSSRVPDLLV
>QNO78697.1 |envelope protein [Severe acute respiratory syndrome coronavirus 2]
MYSFVSEETGTLIVNSVLLFLAFVVFLLVTLAILTALRLCAYCCNIVNVSLVKPSFYVYS
RVKNLNSSRVPDLLV
>QNO78709.1 |envelope protein [Severe acute respiratory syndrome coronavirus 2]
MYSFVSEETGTLIVNSVLLFLAFVVFLLVTLAILTALRLCAYCCNIVNVSLVKPSFYVYS
RVKNLNSSRVPDLLV
>QNO78721.1 |envelope protein [Severe acute respiratory syndrome coronavirus 2]
MYSFVSEETGTLIVNSVLLFLAFVVFLLVTLAILTALRLCAYCCNIVNVSLVKPSFYVYS
RVKNLNSSRVPDLLV
>QNO78733.1 |envelope protein [Severe acute respiratory syndrome coronavirus 2]
MYSFVSEETGTLIVNSVLLFLAFVVFLLVTLAILTALRLCAYCCNIVNVSLVKPSFYVYS
RVKNLNSSRVPDLLV
>QNO78745.1 |envelope protein [Severe acute respiratory syndrome coronavirus 2]
MYSFVSEETGTLIVNSVLLFLAFVVFLLVTLAILTALRLCAYCCNIVNVSLVKPSFYVYS
RVKNLNSSRVPDLLV
>QNO78757.1 |envelope protein [Severe acute respiratory syndrome coronavirus 2]
MYSFVSEETGTLIVNSVLLFLAFVVFLLVTLAILTALRLCAYCCNIVNVSLVKPSFYVYS
RVKNLNSSRVPDLLV
>QNO78769.1 |envelope protein [Severe acute respiratory syndrome coronavirus 2]
MYSFVSEETGTLIVNSVLLFLAFVVFLLVTLAILTALRLCAYCCNIVNVSLVKPSFYVYS
RVKNLNSSRVPDLLV
>QNO78781.1 |envelope protein [Severe acute respiratory syndrome coronavirus 2]
MYSFVSEETGTLIVNSVLLFLAFVVFLLVTLAILTALRLCAYCCNIVNVSLVKPSFYVYS
RVKNLNSSRVPDLLV
>QNO78793.1 |envelope protein [Severe acute respiratory syndrome coronavirus 2]
MYSFVSEETGTLIVNSVLLFLAFVVFLLVTLAILTALRLCAYCCNIVNVSLVKPSFYVYS
RVKNLNSSRVPDLLV
>QNO78805.1 |envelope protein [Severe acute respiratory syndrome coronavirus 2]
MYSFVSEETGTLIVNSVLLFLAFVVFLLVTLAILTALRLCAYCCNIVNVSLVKPSFYVYS
RVKNLNSSRVPDLLV
>QNO78817.1 |envelope protein [Severe acute respiratory syndrome coronavirus 2]
MYSFVSEETGTLIVNSVLLFLAFVVFLLVTLAILTALRLCAYCCNIVNVSLVKPSFYVYS
RVKNLNSSRVPDLLV
>QNO78829.1 |envelope protein [Severe acute respiratory syndrome coronavirus 2]
MYSFVSEETGTLIVNSVLLFLAFVVFLLVTLAILTALRLCAYCCNIVNVSLVKPSFYVYS
RVKNLNSSRVPDLLV
>QNO78841.1 |envelope protein [Severe acute respiratory syndrome coronavirus 2]
MYSFVSEETGTLIVNSVLLFLAFVVFLLVTLAILTALRLCAYCCNIVNVSLVKPSFYVYS
RVKNLNSSRVPDLLV
>QNO78853.1 |envelope protein [Severe acute respiratory syndrome coronavirus 2]
MYSFVSEETGTLIVNSVLLFLAFVVFLLVTLAILTALRLCAYCCNIVNVSLVKPSFYVYS
RVKNLNSSRVPDLLV
>QNO78865.1 |envelope protein [Severe acute respiratory syndrome coronavirus 2]
MYSFVSEETGTLIVNSVLLFLAFVVFLLVTLAILTALRLCAYCCNIVNVSLVKPSFYVYS
RVKNLNSSRVPDLLV
>QNO78877.1 |envelope protein [Severe acute respiratory syndrome coronavirus 2]
MYSFVSEETGTLIVNSVLLFLAFVVFLLVTLAILTALRLCAYCCNIVNVSLVKPSFYVYS
RVKNLNSSRVPDLLV
>QNO78889.1 |envelope protein [Severe acute respiratory syndrome coronavirus 2]
MYSFVSEETGTLIVNSVLLFLAFVVFLLVTLAILTALRLCAYCCNIVNVSLVKPSFYVYS
RVKNLNSSRVPDLLV
>QNO78901.1 |envelope protein [Severe acute respiratory syndrome coronavirus 2]
MYSFVSEETGTLIVNSVLLFLAFVVFLLVTLAILTALRLCAYCCNIVNVSLVKPSFYVYS
RVKNLNSSRVPDLLV
>QNO78913.1 |envelope protein [Severe acute respiratory syndrome coronavirus 2]
MYSFVSEETGTLIVNSVLLFLAFVVFLLVTLAILTALRLCAYCCNIVNVSLVKPSFYVYS
RVKNLNSSRVPDLLV
>QNO78925.1 |envelope protein [Severe acute respiratory syndrome coronavirus 2]
MYSFVSEETGTLIVNSVLLFLAFVVFLLVTLAILTALRLCAYCCNIVNVSLVKPSFYVYS
RVKNLNSSRVPDLLV
>QNO78937.1 |envelope protein [Severe acute respiratory syndrome coronavirus 2]
MYSFVSEETGTLIVNSVLLFLAFVVFLLVTLAILTALRLCAYCCNIVNVSLVKPSFYVYS
RVKNLNSSRVPDLLV
>QNO78949.1 |envelope protein [Severe acute respiratory syndrome coronavirus 2]
MYSFVSEETGTLIVNSVLLFLAFVVFLLVTLAILTALRLCAYCCNIVNVSLVKPSFYVYS
RVKNLNSSRVPDLLV
>QNO78961.1 |envelope protein [Severe acute respiratory syndrome coronavirus 2]
MYSFVSEETGTLIVNSVLLFLAFVVFLLVTLAILTALRLCAYCCNIVNVSLVKPSFYVYS
RVKNLNSSRVPDLLV
>QNO78973.1 |envelope protein [Severe acute respiratory syndrome coronavirus 2]
MYSFVSEETGTLIVNSVLLFLAFVVFLLVTLAILTALRLCAYCCNIVNVSLVKPSFYVYS
RVKNLNSSRVPDLLV
>QNO78985.1 |envelope protein [Severe acute respiratory syndrome coronavirus 2]
MYSFVSEETGTLIVNSVLLFLAFVVFLLVTLAILTALRLCAYCCNIVNVSLVKPSFYVYS
RVKNLNSSRVPDLLV
>QNO78997.1 |envelope protein [Severe acute respiratory syndrome coronavirus 2]
MYSFVSEETGTLIVNSVLLFLAFVVFLLVTLAILTALRLCAYCCNIVNVSLVKPSFYVYS
RVKNLNSSRVPDLLV
>QNO79009.1 |envelope protein [Severe acute respiratory syndrome coronavirus 2]
MYSFVSEETGTLIVNSVLLFLAFVVFLLVTLAILTALRLCAYCCNIVNVSLVKPSFYVYS
RVKNLNSSRVPDLLV
>QNO79021.1 |envelope protein [Severe acute respiratory syndrome coronavirus 2]
MYSFVSEETGTLIVNSVLLFLAFVVFLLVTLAILTALRLCAYCCNIVNVSLVKPSFYVYS
RVKNLNSSRVPDLLV
>QNO79033.1 |envelope protein [Severe acute respiratory syndrome coronavirus 2]
MYSFVSEETGTLIVNSVLLFLAFVVFLLVTLAILTALRLCAYCCNIVNVSLVKPSFYVYS
RVKNLNSSRVPDLLV
>QNO79045.1 |envelope protein [Severe acute respiratory syndrome coronavirus 2]
MYSFVSEETGTLIVNSVLLFLAFVVFLLVTLAILTALRLCAYCCNIVNVSLVKPSFYVYS
RVKNLNSSRVPDLLV
>QNO79057.1 |envelope protein [Severe acute respiratory syndrome coronavirus 2]
MYSFVSEETGTLIVNSVLLFLAFVVFLLVTLAILTALRLCAYCCNIVNVSLVKPSFYVYS
RVKNLNSSRVPDLLV
>QNO79069.1 |envelope protein [Severe acute respiratory syndrome coronavirus 2]
MYSFVSEETGTLIVNSVLLFLAFVVFLLVTLAILTALRLCAYCCNIVNVSLVKPSFYVYS
RVKNLNSSRVPDLLV
>QNO79081.1 |envelope protein [Severe acute respiratory syndrome coronavirus 2]
MYSFVSEETGTLIVNSVLLFLAFVVFLLVTLAILTALRLCAYCCNIVNVSLVKPSFYVYS
RVKNLNSSRVPDLLV
>QNO79093.1 |envelope protein [Severe acute respiratory syndrome coronavirus 2]
MYSFVSEETGTLIVNSVLLFLAFVVFLLVTLAILTALRLCAYCCNIVNVSLVKPSFYVYS
RVKNLNSSRVPDLLV
>QNO79105.1 |envelope protein [Severe acute respiratory syndrome coronavirus 2]
MYSFVSEETGTLIVNSVLLFLAFVVFLLVTLAILTALRLCAYCCNIVNVSLVKPSFYVYS
RVKNLNSSRVPDLLV
>QNO79117.1 |envelope protein [Severe acute respiratory syndrome coronavirus 2]
MYSFVSEETGTLIVNSVLLFLAFVVFLLVTLAILTALRLCAYCCNIVNVSLVKPSFYVYS
RVKNLNSSRVPDLLV
>QNO79129.1 |envelope protein [Severe acute respiratory syndrome coronavirus 2]
MYSFVSEETGTLIVNSVLLFLAFVVFLLVTLAILTALRLCAYCCNIVNVSLVKPSFYVYS
RVKNLNSSRVPDLLV
>QNO79141.1 |envelope protein [Severe acute respiratory syndrome coronavirus 2]
MYSFVSEETGTLIVNSVLLFLAFVVFLLVTLAILTALRLCAYCCNIVNVSLVKPSFYVYS
RVKNLNSSRVPDLLV
>QNO79153.1 |envelope protein [Severe acute respiratory syndrome coronavirus 2]
MYSFVSEETGTLIVNSVLLFLAFVVFLLVTLAILTALRLCAYCCNIVNVSLVKPSFYVYS
RVKNLNSSRVPDLLV
>QNO79165.1 |envelope protein [Severe acute respiratory syndrome coronavirus 2]
MYSFVSEETGTLIVNSVLLFLAFVVFLLVTLAILTALRLCAYCCNIVNVSLVKPSFYVYS
RVKNLNSSRVPDLLV
>QNO79177.1 |envelope protein [Severe acute respiratory syndrome coronavirus 2]
MYSFVSEETGTLIVNSVLLFLAFVVFLLVTLAILTALRLCAYCCNIVNVSLVKPSFYVYS
RVKNLNSSRVPDLLV
>QNO79189.1 |envelope protein [Severe acute respiratory syndrome coronavirus 2]
MYSFVSEETGTLIVNSVLLFLAFVVFLLVTLAILTALRLCAYCCNIVNVSLVKPSFYVYS
RVKNLNSSRVPDLLV
>QNO79201.1 |envelope protein [Severe acute respiratory syndrome coronavirus 2]
MYSFVSEETGTLIVNSVLLFLAFVVFLLVTLAILTALRLCAYCCNIVNVSLVKPSFYVYS
RVKNLNSSRVPDLLV
>QNO79213.1 |envelope protein [Severe acute respiratory syndrome coronavirus 2]
MYSFVSEETGTLIVNSVLLFLAFVVFLLVTLAILTALRLCAYCCNIVNVSLVKPSFYVYS
RVKNLNSSRVPDLLV
>QNO79225.1 |envelope protein [Severe acute respiratory syndrome coronavirus 2]
MYSFVSEETGTLIVNSVLLFLAFVVFLLVTLAILTALRLCAYCCNIVNVSLVKPSFYVYS
RVKNLNSSRVPDLLV
>QNO79237.1 |envelope protein [Severe acute respiratory syndrome coronavirus 2]
MYSFVSEETGTLIVNSVLLFLAFVVFLLVTLAILTALRLCAYCCNIVNVSLVKPSFYVYS
RVKNLNSSRVPDLLV
>QNO79249.1 |envelope protein [Severe acute respiratory syndrome coronavirus 2]
MYSFVSEETGTLIVNSVLLFLAFVVFLLVTLAILTALRLCAYCCNIVNVSLVKPSFYVYS
RVKNLNSSRVPDLLV
>QNO79261.1 |envelope protein [Severe acute respiratory syndrome coronavirus 2]
MYSFVSEETGTLIVNSVLLFLAFVVFLLVTLAILTALRLCAYCCNIVNVSLVKPSFYVYS
RVKNLNSSRVPDLLV
>QNO79273.1 |envelope protein [Severe acute respiratory syndrome coronavirus 2]
MYSFVSEETGTLIVNSVLLFLAFVVFLLVTLAILTALRLCAYCCNIVNVSLVKPSFYVYS
RVKNLNSSRVPDLLV
>QNO79285.1 |envelope protein [Severe acute respiratory syndrome coronavirus 2]
MYSFVSEETGTLIVNSVLLFLAFVVFLLVTLAILTALRLCAYCCNIVNVSLVKPSFYVYS
RVKNLNSSRVPDLLV
>QNO79297.1 |envelope protein [Severe acute respiratory syndrome coronavirus 2]
MYSFVSEETGTLIVNSVLLFLAFVVFLLVTLAILTALRLCAYCCNIVNVSLVKPSFYVYS
RVKNLNSSRVPDLLV
>QNO79309.1 |envelope protein [Severe acute respiratory syndrome coronavirus 2]
MYSFVSEETGTLIVNSVLLFLAFVVFLLVTLAILTALRLCAYCCNIVNVSLVKPSFYVYS
RVKNLNSSRVPDLLV
>QNO79321.1 |envelope protein [Severe acute respiratory syndrome coronavirus 2]
MYSFVSEETGTLIVNSVLLFLAFVVFLLVTLAILTALRLCAYCCNIVNVSLVKPSFYVYS
RVKNLNSSRVPDLLV
>QNO79333.1 |envelope protein [Severe acute respiratory syndrome coronavirus 2]
MYSFVSEETGTLIVNSVLLFLAFVVFLLVTLAILTALRLCAYCCNIVNVSLVKPSFYVYS
RVKNLNSSRVPDLLV
>QNO79345.1 |envelope protein [Severe acute respiratory syndrome coronavirus 2]
MYSFVSEETGTLIVNSVLLFLAFVVFLLVTLAILTALRLCAYCCNIVNVSLVKPSFYVYS
RVKNLNSSRVPDLLV
>QNO79357.1 |envelope protein [Severe acute respiratory syndrome coronavirus 2]
MYSFVSEETGTLIVNSVLLFLAFVVFLLVTLAILTALRLCAYCCNIVNVSLVKPSFYVYS
RVKNLNSSRVPDLLV
>QNO79369.1 |envelope protein [Severe acute respiratory syndrome coronavirus 2]
MYSFVSEETGTLIVNSVLLFLAFVVFLLVTLAILTALRLCAYCCNIVNVSLVKPSFYVYS
RVKNLNSSRVPDLLV
>QNO79381.1 |envelope protein [Severe acute respiratory syndrome coronavirus 2]
MYSFVSEETGTLIVNSVLLFLAFVVFLLVTLAILTALRLCAYCCNIVNVSLVKPSFYVYS
RVKNLNSSRVPDLLV
>QNO79393.1 |envelope protein [Severe acute respiratory syndrome coronavirus 2]
MYSFVSEETGTLIVNSVLLFLAFVVFLLVTLAILTALRLCAYCCNIVNVSLVKPSFYVYS
RVKNLNSSRVPDLLV
>QNO79405.1 |envelope protein [Severe acute respiratory syndrome coronavirus 2]
MYSFVSEETGTLIVNSVLLFLAFVVFLLVTLAILTALRLCAYCCNIVNVSLVKPSFYVYS
RVKNLNSSRVPDLLV
>QNO79417.1 |envelope protein [Severe acute respiratory syndrome coronavirus 2]
MYSFVSEETGTLIVNSVLLFLAFVVFLLVTLAILTALRLCAYCCNIVNVSLVKPSFYVYS
RVKNLNSSRVPDLLV
>QNO79429.1 |envelope protein [Severe acute respiratory syndrome coronavirus 2]
MYSFVSEETGTLIVNSVLLFLAFVVFLLVTLAILTALRLCAYCCNIVNVSLVKPSFYVYS
RVKNLNSSRVPDLLV
>QNO79441.1 |envelope protein [Severe acute respiratory syndrome coronavirus 2]
MYSFVSEETGTLIVNSVLLFLAFVVFLLVTLAILTALRLCAYCCNIVNVSLVKPSFYVYS
RVKNLNSSRVPDLLV
>QNO79453.1 |envelope protein [Severe acute respiratory syndrome coronavirus 2]
MYSFVSEETGTLIVNSVLLFLAFVVFLLVTLAILTALRLCAYCCNIVNVSLVKPSFYVYS
RVKNLNSSRVPDLLV
>QNO79465.1 |envelope protein [Severe acute respiratory syndrome coronavirus 2]
MYSFVSEETGTLIVNSVLLFLAFVVFLLVTLAILTALRLCAYCCNIVNVSLVKPSFYVYS
RVKNLNSSRVPDLLV
>QNO79477.1 |envelope protein [Severe acute respiratory syndrome coronavirus 2]
MYSFVSEETGTLIVNSVLLFLAFVVFLLVTLAILTALRLCAYCCNIVNVSLVKPSFYVYS
RVKNLNSSRVPDLLV
>QNO79489.1 |envelope protein [Severe acute respiratory syndrome coronavirus 2]
MYSFVSEETGTLIVNSVLLFLAFVVFLLVTLAILTALRLCAYCCNIVNVSLVKPSFYVYS
RVKNLNSSRVPDLLV
>QNO79501.1 |envelope protein [Severe acute respiratory syndrome coronavirus 2]
MYSFVSEETGTLIVNSVLLFLAFVVFLLVTLAILTALRLCAYCCNIVNVSLVKPSFYVYS
RVKNLNSSRVPDLLV
>QNO79513.1 |envelope protein [Severe acute respiratory syndrome coronavirus 2]
MYSFVSEETGTLIVNSVLLFLAFVVFLLVTLAILTALRLCAYCCNIVNVSLVKPSFYVYS
RVKNLNSSRVPDLLV
>QNO79525.1 |envelope protein [Severe acute respiratory syndrome coronavirus 2]
MYSFVSEETGTLIVNSVLLFLAFVVFLLVTLAILTALRLCAYCCNIVNVSLVKPSFYVYS
RVKNLNSSRVPDLLV
>QNO79537.1 |envelope protein [Severe acute respiratory syndrome coronavirus 2]
MYSFVSEETGTLIVNSVLLFLAFVVFLLVTLAILTALRLCAYCCNIVNVSLVKPSFYVYS
RVKNLNSSRVPDLLV
>QNO79549.1 |envelope protein [Severe acute respiratory syndrome coronavirus 2]
MYSFVSEETGTLIVNSVLLFLAFVVFLLVTLAILTALRLCAYCCNIVNVSLVKPSFYVYS
RVKNLNSSRVPDLLV
>QNO79561.1 |envelope protein [Severe acute respiratory syndrome coronavirus 2]
MYSFVSEETGTLIVNSVLLFLAFVVFLLVTLAILTALRLCAYCCNIVNVSLVKPSFYVYS
RVKNLNSSRVPDLLV
>QNO79573.1 |envelope protein [Severe acute respiratory syndrome coronavirus 2]
MYSFVSEETGTLIVNSVLLFLAFVVFLLVTLAILTALRLCAYCCNIVNVSLVKPSFYVYS
RVKNLNSSRVPDLLV
>QNO79585.1 |envelope protein [Severe acute respiratory syndrome coronavirus 2]
MYSFVSEETGTLIVNSVLLFLAFVVFLLVTLAILTALRLCAYCCNIVNVSLVKPSFYVYS
RVKNLNSSRVPDLLV
>QNO79597.1 |envelope protein [Severe acute respiratory syndrome coronavirus 2]
MYSFVSEETGTLIVNSVLLFLAFVVFLLVTLAILTALRLCAYCCNIVNVSLVKPSFYVYS
RVKNLNSSRVPDLLV
>QNO79609.1 |envelope protein [Severe acute respiratory syndrome coronavirus 2]
MYSFVSEETGTLIVNSVLLFLAFVVFLLVTLAILTALRLCAYCCNIVNVSLVKPSFYVYS
RVKNLNSSRVPDLLV
>QNO79621.1 |envelope protein [Severe acute respiratory syndrome coronavirus 2]
MYSFVSEETGTLIVNSVLLFLAFVVFLLVTLAILTALRLCAYCCNIVNVSLVKPSFYVYS
RVKNLNSSRVPDLLV
>QNO79633.1 |envelope protein [Severe acute respiratory syndrome coronavirus 2]
MYSFVSEETGTLIVNSVLLFLAFVVFLLVTLAILTALRLCAYCCNIVNVSLVKPSFYVYS
RVKNLNSSRVPDLLV
>QNO79645.1 |envelope protein [Severe acute respiratory syndrome coronavirus 2]
MYSFVSEETGTLIVNSVLLFLAFVVFLLVTLAILTALRLCAYCCNIVNVSLVKPSFYVYS
RVKNLNSSRVPDLLV
>QNO79657.1 |envelope protein [Severe acute respiratory syndrome coronavirus 2]
MYSFVSEETGTLIVNSVLLFLAFVVFLLVTLAILTALRLCAYCCNIVNVSLVKPSFYVYS
RVKNLNSSRVPDLLV
>QNO79669.1 |envelope protein [Severe acute respiratory syndrome coronavirus 2]
MYSFVSEETGTLIVNSVLLFLAFVVFLLVTLAILTALRLCAYCCNIVNVSLVKPSFYVYS
RVKNLNSSRVPDLLV
>QNO79681.1 |envelope protein [Severe acute respiratory syndrome coronavirus 2]
MYSFVSEETGTLIVNSVLLFLAFVVFLLVTLAILTALRLCAYCCNIVNVSLVKPSFYVYS
RVKNLNSSRVPDLLV
>QNO79693.1 |envelope protein [Severe acute respiratory syndrome coronavirus 2]
MYSFVSEETGTLIVNSVLLFLAFVVFLLVTLAILTALRLCAYCCNIVNVSLVKPSFYVYS
RVKNLNSSRVPDLLV
>QNO79705.1 |envelope protein [Severe acute respiratory syndrome coronavirus 2]
MYSFVSEETGTLIVNSVLLFLAFVVFLLVTLAILTALRLCAYCCNIVNVSLVKPSFYVYS
RVKNLNSSRVPDLLV
>QNO79717.1 |envelope protein [Severe acute respiratory syndrome coronavirus 2]
MYSFVSEETGTLIVNSVLLFLAFVVFLLVTLAILTALRLCAYCCNIVNVSLVKPSFYVYS
RVKNLNSSRVPDLLV
>QNO79729.1 |envelope protein [Severe acute respiratory syndrome coronavirus 2]
MYSFVSEETGTLIVNSVLLFLAFVVFLLVTLAILTALRLCAYCCNIVNVSLVKPSFYVYS
RVKNLNSSRVPDLLV
>QNO79741.1 |envelope protein [Severe acute respiratory syndrome coronavirus 2]
MYSFVSEETGTLIVNSVLLFLAFVVFLLVTLAILTALRLCAYCCNIVNVSLVKPSFYVYS
RVKNLNSSRVPDLLV
>QNO79753.1 |envelope protein [Severe acute respiratory syndrome coronavirus 2]
MYSFVSEETGTLIVNSVLLFLAFVVFLLVTLAILTALRLCAYCCNIVNVSLVKPSFYVYS
RVKNLNSSRVPDLLV
>QNO79765.1 |envelope protein [Severe acute respiratory syndrome coronavirus 2]
MYSFVSEETGTLIVNSVLLFLAFVVFLLVTLAILTALRLCAYCCNIVNVSLVKPSFYVYS
RVKNLNSSRVPDLLV
>QNO79777.1 |envelope protein [Severe acute respiratory syndrome coronavirus 2]
MYSFVSEETGTLIVNSVLLFLAFVVFLLVTLAILTALRLCAYCCNIVNVSLVKPSFYVYS
RVKNLNSSRVPDLLV
>QNO79789.1 |envelope protein [Severe acute respiratory syndrome coronavirus 2]
MYSFVSEETGTLIVNSVLLFLAFVVFLLVTLAILTALRLCAYCCNIVNVSLVKPSFYVYS
RVKNLNSSRVPDLLV
>QNO79801.1 |envelope protein [Severe acute respiratory syndrome coronavirus 2]
MYSFVSEETGTLIVNSVLLFLAFVVFLLVTLAILTALRLCAYCCNIVNVSLVKPSFYVYS
RVKNLNSSRVPDLLV
>QNO79813.1 |envelope protein [Severe acute respiratory syndrome coronavirus 2]
MYSFVSEETGTLIVNSVLLFLAFVVFLLVTLAILTALRLCAYCCNIVNVSLVKPSFYVYS
RVKNLNSSRVPDLLV
>QNO79825.1 |envelope protein [Severe acute respiratory syndrome coronavirus 2]
MYSFVSEETGTLIVNSVLLFLAFVVFLLVTLAILTALRLCAYCCNIVNVSLVKPSFYVYS
RVKNLNSSRVPDLLV
>QNO79837.1 |envelope protein [Severe acute respiratory syndrome coronavirus 2]
MYSFVSEETGTLIVNSVLLFLAFVVFLLVTLAILTALRLCAYCCNIVNVSLVKPSFYVYS
RVKNLNSSRVPDLLV
>QNO79849.1 |envelope protein [Severe acute respiratory syndrome coronavirus 2]
MYSFVSEETGTLIVNSVLLFLAFVVFLLVTLAILTALRLCAYCCNIVNVSLVKPSFYVYS
RVKNLNSSRVPDLLV
>QNO79861.1 |envelope protein [Severe acute respiratory syndrome coronavirus 2]
MYSFVSEETGTLIVNSVLLFLAFVVFLLVTLAILTALRLCAYCCNIVNVSLVKPSFYVYS
RVKNLNSSRVPDLLV
>QNO79873.1 |envelope protein [Severe acute respiratory syndrome coronavirus 2]
MYSFVSEETGTLIVNSVLLFLAFVVFLLVTLAILTALRLCAYCCNIVNVSLVKPSFYVYS
RVKNLNSSRVPDLLV
>QNO79885.1 |envelope protein [Severe acute respiratory syndrome coronavirus 2]
MYSFVSEETGTLIVNSVLLFLAFVVFLLVTLAILTALRLCAYCCNIVNVSLVKPSFYVYS
RVKNLNSSRVPDLLV
>QNO79897.1 |envelope protein [Severe acute respiratory syndrome coronavirus 2]
MYSFVSEETGTLIVNSVLLFLAFVVFLLVTLAILTALRLCAYCCNIVNVSLVKPSFYVYS
RVKNLNSSRVPDLLV
>QNO79909.1 |envelope protein [Severe acute respiratory syndrome coronavirus 2]
MYSFVSEETGTLIVNSVLLFLAFVVFLLVTLAILTALRLCAYCCNIVNVSLVKPSFYVYS
RVKNLNSSRVPDLLV
>QNO79921.1 |envelope protein [Severe acute respiratory syndrome coronavirus 2]
MYSFVSEETGTLIVNSVLLFLAFVVFLLVTLAILTALRLCAYCCNIVNVSLVKPSFYVYS
RVKNLNSSRVPDLLV
>QNO79933.1 |envelope protein [Severe acute respiratory syndrome coronavirus 2]
MYSFVSEETGTLIVNSVLLFLAFVVFLLVTLAILTALRLCAYCCNIVNVSLVKPSFYVYS
RVKNLNSSRVPDLLV
>QNO79945.1 |envelope protein [Severe acute respiratory syndrome coronavirus 2]
MYSFVSEETGTLIVNSVLLFLAFVVFLLVTLAILTALRLCAYCCNIVNVSLVKPSFYVYS
RVKNLNSSRVPDLLV
>QNO79957.1 |envelope protein [Severe acute respiratory syndrome coronavirus 2]
MYSFVSEETGTLIVNSVLLFLAFVVFLLVTLAILTALRLCAYCCNIVNVSLVKPSFYVYS
RVKNLNSSRVPDLLV
>QNO79969.1 |envelope protein [Severe acute respiratory syndrome coronavirus 2]
MYSFVSEETGTLIVNSVLLFLAFVVFLLVTLAILTALRLCAYCCNIVNVSLVKPSFYVYS
RVKNLNSSRVPDLLV
>QNO79981.1 |envelope protein [Severe acute respiratory syndrome coronavirus 2]
MYSFVSEETGTLIVNSVLLFLAFVVFLLVTLAILTALRLCAYCCNIVNVSLVKPSFYVYS
RVKNLNSSRVPDLLV
>QNO79993.1 |envelope protein [Severe acute respiratory syndrome coronavirus 2]
MYSFVSEETGTLIVNSVLLFLAFVVFLLVTLAILTALRLCAYCCNIVNVSLVKPSFYVYS
RVKNLNSSRVPDLLV
>QNO80005.1 |envelope protein [Severe acute respiratory syndrome coronavirus 2]
MYSFVSEETGTLIVNSVLLFLAFVVFLLVTLAILTALRLCAYCCNIVNVSLVKPSFYVYS
RVKNLNSSRVPDLLV
>QNO80017.1 |envelope protein [Severe acute respiratory syndrome coronavirus 2]
MYSFVSEETGTLIVNSVLLFLAFVVFLLVTLAILTALRLCAYCCNIVNVSLVKPSFYVYS
RVKNLNSSRVPDLLV
>QNO80029.1 |envelope protein [Severe acute respiratory syndrome coronavirus 2]
MYSFVSEETGTLIVNSVLLFLAFVVFLLVTLAILTALRLCAYCCNIVNVSLVKPSFYVYS
RVKNLNSSRVPDLLV
>QNO80041.1 |envelope protein [Severe acute respiratory syndrome coronavirus 2]
MYSFVSEETGTLIVNSVLLFLAFVVFLLVTLAILTALRLCAYCCNIVNVSLVKPSFYVYS
RVKNLNSSRVPDLLV
>QNO80053.1 |envelope protein [Severe acute respiratory syndrome coronavirus 2]
MYSFVSEETGTLIVNSVLLFLAFVVFLLVTLAILTALRLCAYCCNIVNVSLVKPSFYVYS
RVKNLNSSRVPDLLV
>QNO80065.1 |envelope protein [Severe acute respiratory syndrome coronavirus 2]
MYSFVSEETGTLIVNSVLLFLAFVVFLLVTLAILTALRLCAYCCNIVNVSLVKPSFYVYS
RVKNLNSSRVPDLLV
>QNO80077.1 |envelope protein [Severe acute respiratory syndrome coronavirus 2]
MYSFVSEETGTLIVNSVLLFLAFVVFLLVTLAILTALRLCAYCCNIVNVSLVKPSFYVYS
RVKNLNSSRVPDLLV
>QNO80089.1 |envelope protein [Severe acute respiratory syndrome coronavirus 2]
MYSFVSEETGTLIVNSVLLFLAFVVFLLVTLAILTALRLCAYCCNIVNVSLVKPSFYVYS
RVKNLNSSRVPDLLV
>QNO80101.1 |envelope protein [Severe acute respiratory syndrome coronavirus 2]
MYSFVSEETGTLIVNSVLLFLAFVVFLLVTLAILTALRLCAYCCNIVNVSLVKPSFYVYS
RVKNLNSSRVPDLLV
>QNO80113.1 |envelope protein [Severe acute respiratory syndrome coronavirus 2]
MYSFVSEETGTLIVNSVLLFLAFVVFLLVTLAILTALRLCAYCCNIVNVSLVKPSFYVYS
RVKNLNSSRVPDLLV
>QNO80125.1 |envelope protein [Severe acute respiratory syndrome coronavirus 2]
MYSFVSEETGTLIVNSVLLFLAFVVFLLVTLAILTALRLCAYCCNIVNVSLVKPSFYVYS
RVKNLNSSRVPDLLV
>QNO80137.1 |envelope protein [Severe acute respiratory syndrome coronavirus 2]
MYSFVSEETGTLIVNSVLLFLAFVVFLLVTLAILTALRLCAYCCNIVNVSLVKPSFYVYS
RVKNLNSSRVPDLLV
>QNO80149.1 |envelope protein [Severe acute respiratory syndrome coronavirus 2]
MYSFVSEETGTLIVNSVLLFLAFVVFLLVTLAILTALRLCAYCCNIVNVSLVKPSFYVYS
RVKNLNSSRVPDLLV
>QNO80161.1 |envelope protein [Severe acute respiratory syndrome coronavirus 2]
MYSFVSEETGTLIVNSVLLFLAFVVFLLVTLAILTALRLCAYCCNIVNVSLVKPSFYVYS
RVKNLNSSRVPDLLV
>QNO80173.1 |envelope protein [Severe acute respiratory syndrome coronavirus 2]
MYSFVSEETGTLIVNSVLLFLAFVVFLLVTLAILTALRLCAYCCNIVNVSLVKPSFYVYS
RVKNLNSSRVPDLLV
>QNO80185.1 |envelope protein [Severe acute respiratory syndrome coronavirus 2]
MYSFVSEETGTLIVNSVLLFLAFVVFLLVTLAILTALRLCAYCCNIVNVSLVKPSFYVYS
RVKNLNSSRVPDLLV
>QNO80197.1 |envelope protein [Severe acute respiratory syndrome coronavirus 2]
MYSFVSEETGTLIVNSVLLFLAFVVFLLVTLAILTALRLCAYCCNIVNVSLVKPSFYVYS
RVKNLNSSRVPDLLV
>QNO80209.1 |envelope protein [Severe acute respiratory syndrome coronavirus 2]
MYSFVSEETGTLIVNSVLLFLAFVVFLLVTLAILTALRLCAYCCNIVNVSLVKPSFYVYS
RVKNLNSSRVPDLLV
>QNO80221.1 |envelope protein [Severe acute respiratory syndrome coronavirus 2]
MYSFVSEETGTLIVNSVLLFLAFVVFLLVTLAILTALRLCAYCCNIVNVSLVKPSFYVYS
RVKNLNSSRVPDLLV
>QNO80233.1 |envelope protein [Severe acute respiratory syndrome coronavirus 2]
MYSFVSEETGTLIVNSVLLFLAFVVFLLVTLAILTALRLCAYCCNIVNVSLVKPSFYVYS
RVKNLNSSRVPDLLV
>QNO80245.1 |envelope protein [Severe acute respiratory syndrome coronavirus 2]
MYSFVSEETGTLIVNSVLLFLAFVVFLLVTLAILTALRLCAYCCNIVNVSLVKPSFYVYS
RVKNLNSSRVPDLLV
>QNO80257.1 |envelope protein [Severe acute respiratory syndrome coronavirus 2]
MYSFVSEETGTLIVNSVLLFLAFVVFLLVTLAILTALRLCAYCCNIVNVSLVKPSFYVYS
RVKNLNSSRVPDLLV
>QNO80269.1 |envelope protein [Severe acute respiratory syndrome coronavirus 2]
MYSFVSEETGTLIVNSVLLFLAFVVFLLVTLAILTALRLCAYCCNIVNVSLVKPSFYVYS
RVKNLNSSRVPDLLV
>QNO80281.1 |envelope protein [Severe acute respiratory syndrome coronavirus 2]
MYSFVSEETGTLIVNSVLLFLAFVVFLLVTLAILTALRLCAYCCNIVNVSLVKPSFYVYS
RVKNLNSSRVPDLLV
>QNO80293.1 |envelope protein [Severe acute respiratory syndrome coronavirus 2]
MYSFVSEETGTLIVNSVLLFLAFVVFLLVTLAILTALRLCAYCCNIVNVSLVKPSFYVYS
RVKNLNSSRVPDLLV
>QNO80305.1 |envelope protein [Severe acute respiratory syndrome coronavirus 2]
MYSFVSEETGTLIVNSVLLFLAFVVFLLVTLAILTALRLCAYCCNIVNVSLVKPSFYVYS
RVKNLNSSRVPDLLV
>QNO80317.1 |envelope protein [Severe acute respiratory syndrome coronavirus 2]
MYSFVSEETGTLIVNSVLLFLAFVVFLLVTLAILTALRLCAYCCNIVNVSLVKPSFYVYS
RVKNLNSSRVPDLLV
>QNO80329.1 |envelope protein [Severe acute respiratory syndrome coronavirus 2]
MYSFVSEETGTLIVNSVLLFLAFVVFLLVTLAILTALRLCAYCCNIVNVSLVKPSFYVYS
RVKNLNSSRVPDLLV
>QNO80341.1 |envelope protein [Severe acute respiratory syndrome coronavirus 2]
MYSFVSEETGTLIVNSVLLFLAFVVFLLVTLAILTALRLCAYCCNIVNVSLVKPSFYVYS
RVKNLNSSRVPDLLV
>QNO80353.1 |envelope protein [Severe acute respiratory syndrome coronavirus 2]
MYSFVSEETGTLIVNSVLLFLAFVVFLLVTLAILTALRLCAYCCNIVNVSLVKPSFYVYS
RVKNLNSSRVPDLLV
>QNO80365.1 |envelope protein [Severe acute respiratory syndrome coronavirus 2]
MYSFVSEETGTLIVNSVLLFLAFVVFLLVTLAILTALRLCAYCCNIVNVSLVKPSFYVYS
RVKNLNSSRVPDLLV
>QNO80377.1 |envelope protein [Severe acute respiratory syndrome coronavirus 2]
MYSFVSEETGTLIVNSVLLFLAFVVFLLVTLAILTALRLCAYCCNIVNVSLVKPSFYVYS
RVKNLNSSRVPDLLV
>QNO80389.1 |envelope protein [Severe acute respiratory syndrome coronavirus 2]
MYSFVSEETGTLIVNSVLLFLAFVVFLLVTLAILTALRLCAYCCNIVNVSLVKPSFYVYS
RVKNLNSSRVPDLLV
>QNO80401.1 |envelope protein [Severe acute respiratory syndrome coronavirus 2]
MYSFVSEETGTLIVNSVLLFLAFVVFLLVTLAILTALRLCAYCCNIVNVSLVKPSFYVYS
RVKNLNSSRVPDLLV
>QNO80413.1 |envelope protein [Severe acute respiratory syndrome coronavirus 2]
MYSFVSEETGTLIVNSVLLFLAFVVFLLVTLAILTALRLCAYCCNIVNVSLVKPSFYVYS
RVKNLNSSRVPDLLV
>QNO80425.1 |envelope protein [Severe acute respiratory syndrome coronavirus 2]
MYSFVSEETGTLIVNSVLLFLAFVVFLLVTLAILTALRLCAYCCNIVNVSLVKPSFYVYS
RVKNLNSSRVPDLLV
>QNO80437.1 |envelope protein [Severe acute respiratory syndrome coronavirus 2]
MYSFVSEETGTLIVNSVLLFLAFVVFLLVTLAILTALRLCAYCCNIVNVSLVKPSFYVYS
RVKNLNSSRVPDLLV
>QNO80449.1 |envelope protein [Severe acute respiratory syndrome coronavirus 2]
MYSFVSEETGTLIVNSVLLFLAFVVFLLVTLAILTALRLCAYCCNIVNVSLVKPSFYVYS
RVKNLNSSRVPDLLV
>QNO80461.1 |envelope protein [Severe acute respiratory syndrome coronavirus 2]
MYSFVSEETGTLIVNSVLLFLAFVVFLLVTLAILTALRLCAYCCNIVNVSLVKPSFYVYS
RVKNLNSSRVPDLLV
>QNO80473.1 |envelope protein [Severe acute respiratory syndrome coronavirus 2]
MYSFVSEETGTLIVNSVLLFLAFVVFLLVTLAILTALRLCAYCCNIVNVSLVKPSFYVYS
RVKNLNSSRVPDLLV
>QNO80485.1 |envelope protein [Severe acute respiratory syndrome coronavirus 2]
MYSFVSEETGTLIVNSVLLFLAFVVFLLVTLAILTALRLCAYCCNIVNVSLVKPSFYVYS
RVKNLNSSRVPDLLV
>QNO80497.1 |envelope protein [Severe acute respiratory syndrome coronavirus 2]
MYSFVSEETGTLIVNSVLLFLAFVVFLLVTLAILTALRLCAYCCNIVNVSLVKPSFYVYS
RVKNLNSSRVPDLLV
>QNO80509.1 |envelope protein [Severe acute respiratory syndrome coronavirus 2]
MYSFVSEETGTLIVNSVLLFLAFVVFLLVTLAILTALRLCAYCCNIVNVSLVKPSFYVYS
RVKNLNSSRVPDLLV
>QNO80521.1 |envelope protein [Severe acute respiratory syndrome coronavirus 2]
MYSFVSEETGTLIVNSVLLFLAFVVFLLVTLAILTALRLCAYCCNIVNVSLVKPSFYVYS
RVKNLNSSRVPDLLV
>QNO80533.1 |envelope protein [Severe acute respiratory syndrome coronavirus 2]
MYSFVSEETGTLIVNSVLLFLAFVVFLLVTLAILTALRLCAYCCNIVNVSLVKPSFYVYS
RVKNLNSSRVPDLLV
>QNO80545.1 |envelope protein [Severe acute respiratory syndrome coronavirus 2]
MYSFVSEETGTLIVNSVLLFLAFVVFLLVTLAILTALRLCAYCCNIVNVSLVKPSFYVYS
RVKNLNSSRVPDLLV
>QNO80557.1 |envelope protein [Severe acute respiratory syndrome coronavirus 2]
MYSFVSEETGTLIVNSVLLFLAFVVFLLVTLAILTALRLCAYCCNIVNVSLVKPSFYVYS
RVKNLNSSRVPDLLV
>QNO80569.1 |envelope protein [Severe acute respiratory syndrome coronavirus 2]
MYSFVSEETGTLIVNSVLLFLAFVVFLLVTLAILTALRLCAYCCNIVNVSLVKPSFYVYS
RVKNLNSSRVPDLLV
>QNO80581.1 |envelope protein [Severe acute respiratory syndrome coronavirus 2]
MYSFVSEETGTLIVNSVLLFLAFVVFLLVTLAILTALRLCAYCCNIVNVSLVKPSFYVYS
RVKNLNSSRVPDLLV
>QNO80593.1 |envelope protein [Severe acute respiratory syndrome coronavirus 2]
MYSFVSEETGTLIVNSVLLFLAFVVFLLVTLAILTALRLCAYCCNIVNVSLVKPSFYVYS
RVKNLNSSRVPDLLV
>QNO80605.1 |envelope protein [Severe acute respiratory syndrome coronavirus 2]
MYSFVSEETGTLIVNSVLLFLAFVVFLLVTLAILTALRLCAYCCNIVNVSLVKPSFYVYS
RVKNLNSSRVPDLLV
>QNO80617.1 |envelope protein [Severe acute respiratory syndrome coronavirus 2]
MYSFVSEETGTLIVNSVLLFLAFVVFLLVTLAILTALRLCAYCCNIVNVSLVKPSFYVYS
RVKNLNSSRVPDLLV
>QNO80629.1 |envelope protein [Severe acute respiratory syndrome coronavirus 2]
MYSFVSEETGTLIVNSVLLFLAFVVFLLVTLAILTALRLCAYCCNIVNVSLVKPSFYVYS
RVKNLNSSRVPDLLV
>QNO80641.1 |envelope protein [Severe acute respiratory syndrome coronavirus 2]
MYSFVSEETGTLIVNSVLLFLAFVVFLLVTLAILTALRLCAYCCNIVNVSLVKPSFYVYS
RVKNLNSSRVPDLLV
>QNO80653.1 |envelope protein [Severe acute respiratory syndrome coronavirus 2]
MYSFVSEETGTLIVNSVLLFLAFVVFLLVTLAILTALRLCAYCCNIVNVSLVKPSFYVYS
RVKNLNSSRVPDLLV
>QNO80665.1 |envelope protein [Severe acute respiratory syndrome coronavirus 2]
MYSFVSEETGTLIVNSVLLFLAFVVFLLVTLAILTALRLCAYCCNIVNVSLVKPSFYVYS
RVKNLNSSRVPDLLV
>QNO80677.1 |envelope protein [Severe acute respiratory syndrome coronavirus 2]
MYSFVSEETGTLIVNSVLLFLAFVVFLLVTLAILTALRLCAYCCNIVNVSLVKPSFYVYS
RVKNLNSSRVPDLLV
>QNO80689.1 |envelope protein [Severe acute respiratory syndrome coronavirus 2]
MYSFVSEETGTLIVNSVLLFLAFVVFLLVTLAILTALRLCAYCCNIVNVSLVKPSFYVYS
RVKNLNSSRVPDLLV
>QNO80701.1 |envelope protein [Severe acute respiratory syndrome coronavirus 2]
MYSFVSEETGTLIVNSVLLFLAFVVFLLVTLAILTALRLCAYCCNIVNVSLVKPSFYVYS
RVKNLNSSRVPDLLV
>QNO80713.1 |envelope protein [Severe acute respiratory syndrome coronavirus 2]
MYSFVSEETGTLIVNSVLLFLAFVVFLLVTLAILTALRLCAYCCNIVNVSLVKPSFYVYS
RVKNLNSSRVPDLLV
>QNO80725.1 |envelope protein [Severe acute respiratory syndrome coronavirus 2]
MYSFVSEETGTLIVNSVLLFLAFVVFLLVTLAILTALRLCAYCCNIVNVSLVKPSFYVYS
RVKNLNSSRVPDLLV
>QNO80737.1 |envelope protein [Severe acute respiratory syndrome coronavirus 2]
MYSFVSEETGTLIVNSVLLFLAFVVFLLVTLAILTALRLCAYCCNIVNVSLVKPSFYVYS
RVKNLNSSRVPDLLV
>QNO80749.1 |envelope protein [Severe acute respiratory syndrome coronavirus 2]
MYSFVSEETGTLIVNSVLLFLAFVVFLLVTLAILTALRLCAYCCNIVNVSLVKPSFYVYS
RVKNLNSSRVPDLLV
>QNO80761.1 |envelope protein [Severe acute respiratory syndrome coronavirus 2]
MYSFVSEETGTLIVNSVLLFLAFVVFLLVTLAILTALRLCAYCCNIVNVSLVKPSFYVYS
RVKNLNSSRVPDLLV
>QNO80773.1 |envelope protein [Severe acute respiratory syndrome coronavirus 2]
MYSFVSEETGTLIVNSVLLFLAFVVFLLVTLAILTALRLCAYCCNIVNVSLVKPSFYVYS
RVKNLNSSRVPDLLV
>QNO80785.1 |envelope protein [Severe acute respiratory syndrome coronavirus 2]
MYSFVSEETGTLIVNSVLLFLAFVVFLLVTLAILTALRLCAYCCNIVNVSLVKPSFYVYS
RVKNLNSSRVPDLLV
>QNO80797.1 |envelope protein [Severe acute respiratory syndrome coronavirus 2]
MYSFVSEETGTLIVNSVLLFLAFVVFLLVTLAILTALRLCAYCCNIVNVSLVKPSFYVYS
RVKNLNSSRVPDLLV
>QNO80809.1 |envelope protein [Severe acute respiratory syndrome coronavirus 2]
MYSFVSEETGTLIVNSVLLFLAFVVFLLVTLAILTALRLCAYCCNIVNVSLVKPSFYVYS
RVKNLNSSRVPDLLV
>QNO80821.1 |envelope protein [Severe acute respiratory syndrome coronavirus 2]
MYSFVSEETGTLIVNSVLLFLAFVVFLLVTLAILTALRLCAYCCNIVNVSLVKPSFYVYS
RVKNLNSSRVPDLLV
>QNO80833.1 |envelope protein [Severe acute respiratory syndrome coronavirus 2]
MYSFVSEETGTLIVNSVLLFLAFVVFLLVTLAILTALRLCAYCCNIVNVSLVKPSFYVYS
RVKNLNSSRVPDLLV
>QNO80845.1 |envelope protein [Severe acute respiratory syndrome coronavirus 2]
MYSFVSEETGTLIVNSVLLFLAFVVFLLVTLAILTALRLCAYCCNIVNVSLVKPSFYVYS
RVKNLNSSRVPDLLV
>QNO80857.1 |envelope protein [Severe acute respiratory syndrome coronavirus 2]
MYSFVSEETGTLIVNSVLLFLAFVVFLLVTLAILTALRLCAYCCNIVNVSLVKPSFYVYS
RVKNLNSSRVPDLLV
>QNO80869.1 |envelope protein [Severe acute respiratory syndrome coronavirus 2]
MYSFVSEETGTLIVNSVLLFLAFVVFLLVTLAILTALRLCAYCCNIVNVSLVKPSFYVYS
RVKNLNSSRVPDLLV
>QNO80881.1 |envelope protein [Severe acute respiratory syndrome coronavirus 2]
MYSFVSEETGTLIVNSVLLFLAFVVFLLVTLAILTALRLCAYCCNIVNVSLVKPSFYVYS
RVKNLNSSRVPDLLV
>QNO80893.1 |envelope protein [Severe acute respiratory syndrome coronavirus 2]
MYSFVSEETGTLIVNSVLLFLAFVVFLLVTLAILTALRLCAYCCNIVNVSLVKPSFYVYS
RVKNLNSSRVPDLLV
>QNO80905.1 |envelope protein [Severe acute respiratory syndrome coronavirus 2]
MYSFVSEETGTLIVNSVLLFLAFVVFLLVTLAILTALRLCAYCCNIVNVSLVKPSFYVYS
RVKNLNSSRVPDLLV
>QNO80917.1 |envelope protein [Severe acute respiratory syndrome coronavirus 2]
MYSFVSEETGTLIVNSVLLFLAFVVFLLVTLAILTALRLCAYCCNIVNVSLVKPSFYVYS
RVKNLNSSRVPDLLV
>QNO80929.1 |envelope protein [Severe acute respiratory syndrome coronavirus 2]
MYSFVSEETGTLIVNSVLLFLAFVVFLLVTLAILTALRLCAYCCNIVNVSLVKPSFYVYS
RVKNLNSSRVPDLLV
>QNO80941.1 |envelope protein [Severe acute respiratory syndrome coronavirus 2]
MYSFVSEETGTLIVNSVLLFLAFVVFLLVTLAILTALRLCAYCCNIVNVSLVKPSFYVYS
RVKNLNSSRVPDLLV
>QNO80953.1 |envelope protein [Severe acute respiratory syndrome coronavirus 2]
MYSFVSEETGTLIVNSVLLFLAFVVFLLVTLAILTALRLCAYCCNIVNVSLVKPSFYVYS
RVKNLNSSRVPDLLV
>QNO80965.1 |envelope protein [Severe acute respiratory syndrome coronavirus 2]
MYSFVSEETGTLIVNSVLLFLAFVVFLLVTLAILTALRLCAYCCNIVNVSLVKPSFYVYS
RVKNLNSSRVPDLLV
>QNO80977.1 |envelope protein [Severe acute respiratory syndrome coronavirus 2]
MYSFVSEETGTLIVNSVLLFLAFVVFLLVTLAILTALRLCAYCCNIVNVSLVKPSFYVYS
RVKNLNSSRVPDLLV
>QNO80989.1 |envelope protein [Severe acute respiratory syndrome coronavirus 2]
MYSFVSEETGTLIVNSVLLFLAFVVFLLVTLAILTALRLCAYCCNIVNVSLVKPSFYVYS
RVKNLNSSRVPDLLV
>QNO81001.1 |envelope protein [Severe acute respiratory syndrome coronavirus 2]
MYSFVSEETGTLIVNSVLLFLAFVVFLLVTLAILTALRLCAYCCNIVNVSLVKPSFYVYS
RVKNLNSSRVPDLLV
>QNO81013.1 |envelope protein [Severe acute respiratory syndrome coronavirus 2]
MYSFVSEETGTLIVNSVLLFLAFVVFLLVTLAILTALRLCAYCCNIVNVSLVKPSFYVYS
RVKNLNSSRVPDLLV
>QNO81025.1 |envelope protein [Severe acute respiratory syndrome coronavirus 2]
MYSFVSEETGTLIVNSVLLFLAFVVFLLVTLAILTALRLCAYCCNIVNVSLVKPSFYVYS
RVKNLNSSRVPDLLV
>QNO81037.1 |envelope protein [Severe acute respiratory syndrome coronavirus 2]
MYSFVSEETGTLIVNSVLLFLAFVVFLLVTLAILTALRLCAYCCNIVNVSLVKPSFYVYS
RVKNLNSSRVPDLLV
>QNO81049.1 |envelope protein [Severe acute respiratory syndrome coronavirus 2]
MYSFVSEETGTLIVNSVLLFLAFVVFLLVTLAILTALRLCAYCCNIVNVSLVKPSFYVYS
RVKNLNSSRVPDLLV
>QNO81061.1 |envelope protein [Severe acute respiratory syndrome coronavirus 2]
MYSFVSEETGTLIVNSVLLFLAFVVFLLVTLAILTALRLCAYCCNIVNVSLVKPSFYVYS
RVKNLNSSRVPDLLV
>QNO81073.1 |envelope protein [Severe acute respiratory syndrome coronavirus 2]
MYSFVSEETGTLIVNSVLLFLAFVVFLLVTLAILTALRLCAYCCNIVNVSLVKPSFYVYS
RVKNLNSSRVPDLLV
>QNO81085.1 |envelope protein [Severe acute respiratory syndrome coronavirus 2]
MYSFVSEETGTLIVNSVLLFLAFVVFLLVTLAILTALRLCAYCCNIVNVSLVKPSFYVYS
RVKNLNSSRVPDLLV
>QNO81097.1 |envelope protein [Severe acute respiratory syndrome coronavirus 2]
MYSFVSEETGTLIVNSVLLFLAFVVFLLVTLAILTALRLCAYCCNIVNVSLVKPSFYVYS
RVKNLNSSRVPDLLV
>QNO81109.1 |envelope protein [Severe acute respiratory syndrome coronavirus 2]
MYSFVSEETGTLIVNSVLLFLAFVVFLLVTLAILTALRLCAYCCNIVNVSLVKPSFYVYS
RVKNLNSSRVPDLLV
>QNO81121.1 |envelope protein [Severe acute respiratory syndrome coronavirus 2]
MYSFVSEETGTLIVNSVLLFLAFVVFLLVTLAILTALRLCAYCCNIVNVSLVKPSFYVYS
RVKNLNSSRVPDLLV
>QNO81133.1 |envelope protein [Severe acute respiratory syndrome coronavirus 2]
MYSFVSEETGTLIVNSVLLFLAFVVFLLVTLAILTALRLCAYCCNIVNVSLVKPSFYVYS
RVKNLNSSRVPDLLV
>QNO81145.1 |envelope protein [Severe acute respiratory syndrome coronavirus 2]
MYSFVSEETGTLIVNSVLLFLAFVVFLLVTLAILTALRLCAYCCNIVNVSLVKPSFYVYS
RVKNLNSSRVPDLLV
>QNO81157.1 |envelope protein [Severe acute respiratory syndrome coronavirus 2]
MYSFVSEETGTLIVNSVLLFLAFVVFLLVTLAILTALRLCAYCCNIVNVSLVKPSFYVYS
RVKNLNSSRVPDLLV
>QNO81169.1 |envelope protein [Severe acute respiratory syndrome coronavirus 2]
MYSFVSEETGTLIVNSVLLFLAFVVFLLVTLAILTALRLCAYCCNIVNVSLVKPSFYVYS
RVKNLNSSRVPDLLV
>QNO81181.1 |envelope protein [Severe acute respiratory syndrome coronavirus 2]
MYSFVSEETGTLIVNSVLLFLAFVVFLLVTLAILTALRLCAYCCNIVNVSLVKPSFYVYS
RVKNLNSSRVPDLLV
>QNO81193.1 |envelope protein [Severe acute respiratory syndrome coronavirus 2]
MYSFVSEETGTLIVNSVLLFLAFVVFLLVTLAILTALRLCAYCCNIVNVSLVKPSFYVYS
RVKNLNSSRVPDLLV
>QNO81205.1 |envelope protein [Severe acute respiratory syndrome coronavirus 2]
MYSFVSEETGTLIVNSVLLFLAFVVFLLVTLAILTALRLCAYCCNIVNVSLVKPSFYVYS
RVKNLNSSRVPDLLV
>QNO81217.1 |envelope protein [Severe acute respiratory syndrome coronavirus 2]
MYSFVSEETGTLIVNSVLLFLAFVVFLLVTLAILTALRLCAYCCNIVNVSLVKPSFYVYS
RVKNLNSSRVPDLLV
>QNO81229.1 |envelope protein [Severe acute respiratory syndrome coronavirus 2]
MYSFVSEETGTLIVNSVLLFLAFVVFLLVTLAILTALRLCAYCCNIVNVSLVKPSFYVYS
RVKNLNSSRVPDLLV
>QNO81241.1 |envelope protein [Severe acute respiratory syndrome coronavirus 2]
MYSFVSEETGTLIVNSVLLFLAFVVFLLVTLAILTALRLCAYCCNIVNVSLVKPSFYVYS
RVKNLNSSRVPDLLV
>QNO81253.1 |envelope protein [Severe acute respiratory syndrome coronavirus 2]
MYSFVSEETGTLIVNSVLLFLAFVVFLLVTLAILTALRLCAYCCNIVNVSLVKPSFYVYS
RVKNLNSSRVPDLLV
>QNO81265.1 |envelope protein [Severe acute respiratory syndrome coronavirus 2]
MYSFVSEETGTLIVNSVLLFLAFVVFLLVTLAILTALRLCAYCCNIVNVSLVKPSFYVYS
RVKNLNSSRVPDLLV
>QNO81277.1 |envelope protein [Severe acute respiratory syndrome coronavirus 2]
MYSFVSEETGTLIVNSVLLFLAFVVFLLVTLAILTALRLCAYCCNIVNVSLVKPSFYVYS
RVKNLNSSRVPDLLV
>QNO81289.1 |envelope protein [Severe acute respiratory syndrome coronavirus 2]
MYSFVSEETGTLIVNSVLLFLAFVVFLLVTLAILTALRLCAYCCNIVNVSLVKPSFYVYS
RVKNLNSSRVPDLLV
>QNO81301.1 |envelope protein [Severe acute respiratory syndrome coronavirus 2]
MYSFVSEETGTLIVNSVLLFLAFVVFLLVTLAILTALRLCAYCCNIVNVSLVKPSFYVYS
RVKNLNSSRVPDLLV
>QNO81313.1 |envelope protein [Severe acute respiratory syndrome coronavirus 2]
MYSFVSEETGTLIVNSVLLFLAFVVFLLVTLAILTALRLCAYCCNIVNVSLVKPSFYVYS
RVKNLNSSRVPDLLV
>QNO81325.1 |envelope protein [Severe acute respiratory syndrome coronavirus 2]
MYSFVSEETGTLIVNSVLLFLAFVVFLLVTLAILTALRLCAYCCNIVNVSLVKPSFYVYS
RVKNLNSSRVPDLLV
>QNO81337.1 |envelope protein [Severe acute respiratory syndrome coronavirus 2]
MYSFVSEETGTLIVNSVLLFLAFVVFLLVTLAILTALRLCAYCCNIVNVSLVKPSFYVYS
RVKNLNSSRVPDLLV
>QNO81349.1 |envelope protein [Severe acute respiratory syndrome coronavirus 2]
MYSFVSEETGTLIVNSVLLFLAFVVFLLVTLAILTALRLCAYCCNIVNVSLVKPSFYVYS
RVKNLNSSRVPDLLV
>QNO81361.1 |envelope protein [Severe acute respiratory syndrome coronavirus 2]
MYSFVSEETGTLIVNSVLLFLAFVVFLLVTLAILTALRLCAYCCNIVNVSLVKPSFYVYS
RVKNLNSSRVPDLLV
>QNO81373.1 |envelope protein [Severe acute respiratory syndrome coronavirus 2]
MYSFVSEETGTLIVNSVLLFLAFVVFLLVTLAILTALRLCAYCCNIVNVSLVKPSFYVYS
RVKNLNSSRVPDLLV
>QNO81385.1 |envelope protein [Severe acute respiratory syndrome coronavirus 2]
MYSFVSEETGTLIVNSVLLFLAFVVFLLVTLAILTALRLCAYCCNIVNVSLVKPSFYVYS
RVKNLNSSRVPDLLV
>QNO81397.1 |envelope protein [Severe acute respiratory syndrome coronavirus 2]
MYSFVSEETGTLIVNSVLLFLAFVVFLLVTLAILTALRLCAYCCNIVNVSLVKPSFYVYS
RVKNLNSSRVPDLLV
>QNO81409.1 |envelope protein [Severe acute respiratory syndrome coronavirus 2]
MYSFVSEETGTLIVNSVLLFLAFVVFLLVTLAILTALRLCAYCCNIVNVSLVKPSFYVYS
RVKNLNSSRVPDLLV
>QNO81421.1 |envelope protein [Severe acute respiratory syndrome coronavirus 2]
MYSFVSEETGTLIVNSVLLFLAFVVFLLVTLAILTALRLCAYCCNIVNVSLVKPSFYVYS
RVKNLNSSRVPDLLV
>QNO81433.1 |envelope protein [Severe acute respiratory syndrome coronavirus 2]
MYSFVSEETGTLIVNSVLLFLAFVVFLLVTLAILTALRLCAYCCNIVNVSLVKPSFYVYS
RVKNLNSSRVPDLLV
>QNO81445.1 |envelope protein [Severe acute respiratory syndrome coronavirus 2]
MYSFVSEETGTLIVNSVLLFLAFVVFLLVTLAILTALRLCAYCCNIVNVSLVKPSFYVYS
RVKNLNSSRVPDLLV
>QNO81457.1 |envelope protein [Severe acute respiratory syndrome coronavirus 2]
MYSFVSEETGTLIVNSVLLFLAFVVFLLVTLAILTALRLCAYCCNIVNVSLVKPSFYVYS
RVKNLNSSRVPDLLV
>QNO81469.1 |envelope protein [Severe acute respiratory syndrome coronavirus 2]
MYSFVSEETGTLIVNSVLLFLAFVVFLLVTLAILTALRLCAYCCNIVNVSLVKPSFYVYS
RVKNLNSSRVPDLLV
>QNO81481.1 |envelope protein [Severe acute respiratory syndrome coronavirus 2]
MYSFVSEETGTLIVNSVLLFLAFVVFLLVTLAILTALRLCAYCCNIVNVSLVKPSFYVYS
RVKNLNSSRVPDLLV
>QNO81493.1 |envelope protein [Severe acute respiratory syndrome coronavirus 2]
MYSFVSEETGTLIVNSVLLFLAFVVFLLVTLAILTALRLCAYCCNIVNVSLVKPSFYVYS
RVKNLNSSRVPDLLV
>QNO81505.1 |envelope protein [Severe acute respiratory syndrome coronavirus 2]
MYSFVSEETGTLIVNSVLLFLAFVVFLLVTLAILTALRLCAYCCNIVNVSLVKPSFYVYS
RVKNLNSSRVPDLLV
>QNO81517.1 |envelope protein [Severe acute respiratory syndrome coronavirus 2]
MYSFVSEETGTLIVNSVLLFLAFVVFLLVTLAILTALRLCAYCCNIVNVSLVKPSFYVYS
RVKNLNSSRVPDLLV
>QNO81529.1 |envelope protein [Severe acute respiratory syndrome coronavirus 2]
MYSFVSEETGTLIVNSVLLFLAFVVFLLVTLAILTALRLCAYCCNIVNVSLVKPSFYVYS
RVKNLNSSRVPDLLV
>QNO81541.1 |envelope protein [Severe acute respiratory syndrome coronavirus 2]
MYSFVSEETGTLIVNSVLLFLAFVVFLLVTLAILTALRLCAYCCNIVNVSLVKPSFYVYS
RVKNLNSSRVPDLLV
>QNO81553.1 |envelope protein [Severe acute respiratory syndrome coronavirus 2]
MYSFVSEETGTLIVNSVLLFLAFVVFLLVTLAILTALRLCAYCCNIVNVSLVKPSFYVYS
RVKNLNSSRVPDLLV
>QNO81565.1 |envelope protein [Severe acute respiratory syndrome coronavirus 2]
MYSFVSEETGTLIVNSVLLFLAFVVFLLVTLAILTALRLCAYCCNIVNVSLVKPSFYVYS
RVKNLNSSRVPDLLV
>QNO81577.1 |envelope protein [Severe acute respiratory syndrome coronavirus 2]
MYSFVSEETGTLIVNSVLLFLAFVVFLLVTLAILTALRLCAYCCNIVNVSLVKPSFYVYS
RVKNLNSSRVPDLLV
>QNO81589.1 |envelope protein [Severe acute respiratory syndrome coronavirus 2]
MYSFVSEETGTLIVNSVLLFLAFVVFLLVTLAILTALRLCAYCCNIVNVSLVKPSFYVYS
RVKNLNSSRVPDLLV
>QNO81601.1 |envelope protein [Severe acute respiratory syndrome coronavirus 2]
MYSFVSEETGTLIVNSVLLFLAFVVFLLVTLAILTALRLCAYCCNIVNVSLVKPSFYVYS
RVKNLNSSRVPDLLV
>QNO81613.1 |envelope protein [Severe acute respiratory syndrome coronavirus 2]
MYSFVSEETGTLIVNSVLLFLAFVVFLLVTLAILTALRLCAYCCNIVNVSLVKPSFYVYS
RVKNLNSSRVPDLLV
>QNO81625.1 |envelope protein [Severe acute respiratory syndrome coronavirus 2]
MYSFVSEETGTLIVNSVLLFLAFVVFLLVTLAILTALRLCAYCCNIVNVSLVKPSFYVYS
RVKNLNSSRVPDLLV
>QNO81637.1 |envelope protein [Severe acute respiratory syndrome coronavirus 2]
MYSFVSEETGTLIVNSVLLFLAFVVFLLVTLAILTALRLCAYCCNIVNVSLVKPSFYVYS
RVKNLNSSRVPDLLV
>QNO81649.1 |envelope protein [Severe acute respiratory syndrome coronavirus 2]
MYSFVSEETGTLIVNSVLLFLAFVVFLLVTLAILTALRLCAYCCNIVNVSLVKPSFYVYS
RVKNLNSSRVPDLLV
>QNO81661.1 |envelope protein [Severe acute respiratory syndrome coronavirus 2]
MYSFVSEETGTLIVNSVLLFLAFVVFLLVTLAILTALRLCAYCCNIVNVSLVKPSFYVYS
RVKNLNSSRVPDLLV
>QNO81673.1 |envelope protein [Severe acute respiratory syndrome coronavirus 2]
MYSFVSEETGTLIVNSVLLFLAFVVFLLVTLAILTALRLCAYCCNIVNVSLVKPSFYVYS
RVKNLNSSRVPDLLV
>QNO81685.1 |envelope protein [Severe acute respiratory syndrome coronavirus 2]
MYSFVSEETGTLIVNSVLLFLAFVVFLLVTLAILTALRLCAYCCNIVNVSLVKPSFYVYS
RVKNLNSSRVPDLLV
>QNO81697.1 |envelope protein [Severe acute respiratory syndrome coronavirus 2]
MYSFVSEETGTLIVNSVLLFLAFVVFLLVTLAILTALRLCAYCCNIVNVSLVKPSFYVYS
RVKNLNSSRVPDLLV
>QNO81709.1 |envelope protein [Severe acute respiratory syndrome coronavirus 2]
MYSFVSEETGTLIVNSVLLFLAFVVFLLVTLAILTALRLCAYCCNIVNVSLVKPSFYVYS
RVKNLNSSRVPDLLV
>QNO81721.1 |envelope protein [Severe acute respiratory syndrome coronavirus 2]
MYSFVSEETGTLIVNSVLLFLAFVVFLLVTLAILTALRLCAYCCNIVNVSLVKPSFYVYS
RVKNLNSSRVPDLLV
>QNO81733.1 |envelope protein [Severe acute respiratory syndrome coronavirus 2]
MYSFVSEETGTLIVNSVLLFLAFVVFLLVTLAILTALRLCAYCCNIVNVSLVKPSFYVYS
RVKNLNSSRVPDLLV
>QNO81745.1 |envelope protein [Severe acute respiratory syndrome coronavirus 2]
MYSFVSEETGTLIVNSVLLFLAFVVFLLVTLAILTALRLCAYCCNIVNVSLVKPSFYVYS
RVKNLNSSRVPDLLV
>QNO81757.1 |envelope protein [Severe acute respiratory syndrome coronavirus 2]
MYSFVSEETGTLIVNSVLLFLAFVVFLLVTLAILTALRLCAYCCNIVNVSLVKPSFYVYS
RVKNLNSSRVPDLLV
>QNO81769.1 |envelope protein [Severe acute respiratory syndrome coronavirus 2]
MYSFVSEETGTLIVNSVLLFLAFVVFLLVTLAILTALRLCAYCCNIVNVSLVKPSFYVYS
RVKNLNSSRVPDLLV
>QNO81781.1 |envelope protein [Severe acute respiratory syndrome coronavirus 2]
MYSFVSEETGTLIVNSVLLFLAFVVFLLVTLAILTALRLCAYCCNIVNVSLVKPSFYVYS
RVKNLNSSRVPDLLV
>QNO81793.1 |envelope protein [Severe acute respiratory syndrome coronavirus 2]
MYSFVSEETGTLIVNSVLLFLAFVVFLLVTLAILTALRLCAYCCNIVNVSLVKPSFYVYS
RVKNLNSSRVPDLLV
>QNO81805.1 |envelope protein [Severe acute respiratory syndrome coronavirus 2]
MYSFVSEETGTLIVNSVLLFLAFVVFLLVTLAILTALRLCAYCCNIVNVSLVKPSFYVYS
RVKNLNSSRVPDLLV
>QNO81817.1 |envelope protein [Severe acute respiratory syndrome coronavirus 2]
MYSFVSEETGTLIVNSVLLFLAFVVFLLVTLAILTALRLCAYCCNIVNVSLVKPSFYVYS
RVKNLNSSRVPDLLV
>QNO81829.1 |envelope protein [Severe acute respiratory syndrome coronavirus 2]
MYSFVSEETGTLIVNSVLLFLAFVVFLLVTLAILTALRLCAYCCNIVNVSLVKPSFYVYS
RVKNLNSSRVPDLLV
>QNO81841.1 |envelope protein [Severe acute respiratory syndrome coronavirus 2]
MYSFVSEETGTLIVNSVLLFLAFVVFLLVTLAILTALRLCAYCCNIVNVSLVKPSFYVYS
RVKNLNSSRVPDLLV
>QNO81853.1 |envelope protein [Severe acute respiratory syndrome coronavirus 2]
MYSFVSEETGTLIVNSVLLFLAFVVFLLVTLAILTALRLCAYCCNIVNVSLVKPSFYVYS
RVKNLNSSRVPDLLV
>QNO81865.1 |envelope protein [Severe acute respiratory syndrome coronavirus 2]
MYSFVSEETGTLIVNSVLLFLAFVVFLLVTLAILTALRLCAYCCNIVNVSLVKPSFYVYS
RVKNLNSSRVPDLLV
>QNO81877.1 |envelope protein [Severe acute respiratory syndrome coronavirus 2]
MYSFVSEETGTLIVNSVLLFLAFVVFLLVTLAILTALRLCAYCCNIVNVSLVKPSFYVYS
RVKNLNSSRVPDLLV
>QNO81889.1 |envelope protein [Severe acute respiratory syndrome coronavirus 2]
MYSFVSEETGTLIVNSVLLFLAFVVFLLVTLAILTALRLCAYCCNIVNVSLVKPSFYVYS
RVKNLNSSRVPDLLV
>QNO81901.1 |envelope protein [Severe acute respiratory syndrome coronavirus 2]
MYSFVSEETGTLIVNSVLLFLAFVVFLLVTLAILTALRLCAYCCNIVNVSLVKPSFYVYS
RVKNLNSSRVPDLLV
>QNO81913.1 |envelope protein [Severe acute respiratory syndrome coronavirus 2]
MYSFVSEETGTLIVNSVLLFLAFVVFLLVTLAILTALRLCAYCCNIVNVSLVKPSFYVYS
RVKNLNSSRVPDLLV
>QNO81925.1 |envelope protein [Severe acute respiratory syndrome coronavirus 2]
MYSFVSEETGTLIVNSVLLFLAFVVFLLVTLAILTALRLCAYCCNIVNVSLVKPSFYVYS
RVKNLNSSRVPDLLV
>QNO81937.1 |envelope protein [Severe acute respiratory syndrome coronavirus 2]
MYSFVSEETGTLIVNSVLLFLAFVVFLLVTLAILTALRLCAYCCNIVNVSLVKPSFYVYS
RVKNLNSSRVPDLLV
>QNO81949.1 |envelope protein [Severe acute respiratory syndrome coronavirus 2]
MYSFVSEETGTLIVNSVLLFLAFVVFLLVTLAILTALRLCAYCCNIVNVSLVKPSFYVYS
RVKNLNSSRVPDLLV
>QNO81961.1 |envelope protein [Severe acute respiratory syndrome coronavirus 2]
MYSFVSEETGTLIVNSVLLFLAFVVFLLVTLAILTALRLCAYCCNIVNVSLVKPSFYVYS
RVKNLNSSRVPDLLV
>QNO81973.1 |envelope protein [Severe acute respiratory syndrome coronavirus 2]
MYSFVSEETGTLIVNSVLLFLAFVVFLLVTLAILTALRLCAYCCNIVNVSLVKPSFYVYS
RVKNLNSSRVPDLLV
>QNO81985.1 |envelope protein [Severe acute respiratory syndrome coronavirus 2]
MYSFVSEETGTLIVNSVLLFLAFVVFLLVTLAILTALRLCAYCCNIVNVSLVKPSFYVYS
RVKNLNSSRVPDLLV
>QNO81997.1 |envelope protein [Severe acute respiratory syndrome coronavirus 2]
MYSFVSEETGTLIVNSVLLFLAFVVFLLVTLAILTALRLCAYCCNIVNVSLVKPSFYVYS
RVKNLNSSRVPDLLV
>QNO82009.1 |envelope protein [Severe acute respiratory syndrome coronavirus 2]
MYSFVSEETGTLIVNSVLLFLAFVVFLLVTLAILTALRLCAYCCNIVNVSLVKPSFYVYS
RVKNLNSSRVPDLLV
>QNO82021.1 |envelope protein [Severe acute respiratory syndrome coronavirus 2]
MYSFVSEETGTLIVNSVLLFLAFVVFLLVTLAILTALRLCAYCCNIVNVSLVKPSFYVYS
RVKNLNSSRVPDLLV
>QNO82033.1 |envelope protein [Severe acute respiratory syndrome coronavirus 2]
MYSFVSEETGTLIVNSVLLFLAFVVFLLVTLAILTALRLCAYCCNIVNVSLVKPSFYVYS
RVKNLNSSRVPDLLV
>QNO82045.1 |envelope protein [Severe acute respiratory syndrome coronavirus 2]
MYSFVSEETGTLIVNSVLLFLAFVVFLLVTLAILTALRLCAYCCNIVNVSLVKPSFYVYS
RVKNLNSSRVPDLLV
>QNO82057.1 |envelope protein [Severe acute respiratory syndrome coronavirus 2]
MYSFVSEETGTLIVNSVLLFLAFVVFLLVTLAILTALRLCAYCCNIVNVSLVKPSFYVYS
RVKNLNSSRVPDLLV
>QNO82069.1 |envelope protein [Severe acute respiratory syndrome coronavirus 2]
MYSFVSEETGTLIVNSVLLFLAFVVFLLVTLAILTALRLCAYCCNIVNVSLVKPSFYVYS
RVKNLNSSRVPDLLV
>QNO82081.1 |envelope protein [Severe acute respiratory syndrome coronavirus 2]
MYSFVSEETGTLIVNSVLLFLAFVVFLLVTLAILTALRLCAYCCNIVNVSLVKPSFYVYS
RVKNLNSSRVPDLLV
>QNO82093.1 |envelope protein [Severe acute respiratory syndrome coronavirus 2]
MYSFVSEETGTLIVNSVLLFLAFVVFLLVTLAILTALRLCAYCCNIVNVSLVKPSFYVYS
RVKNLNSSRVPDLLV
>QNO82105.1 |envelope protein [Severe acute respiratory syndrome coronavirus 2]
MYSFVSEETGTLIVNSVLLFLAFVVFLLVTLAILTALRLCAYCCNIVNVSLVKPSFYVYS
RVKNLNSSRVPDLLV
>QNO82117.1 |envelope protein [Severe acute respiratory syndrome coronavirus 2]
MYSFVSEETGTLIVNSVLLFLAFVVFLLVTLAILTALRLCAYCCNIVNVSLVKPSFYVYS
RVKNLNSSRVPDLLV
>QNO82129.1 |envelope protein [Severe acute respiratory syndrome coronavirus 2]
MYSFVSEETGTLIVNSVLLFLAFVVFLLVTLAILTALRLCAYCCNIVNVSLVKPSFYVYS
RVKNLNSSRVPDLLV
>QNO82141.1 |envelope protein [Severe acute respiratory syndrome coronavirus 2]
MYSFVSEETGTLIVNSVLLFLAFVVFLLVTLAILTALRLCAYCCNIVNVSLVKPSFYVYS
RVKNLNSSRVPDLLV
>QNO82153.1 |envelope protein [Severe acute respiratory syndrome coronavirus 2]
MYSFVSEETGTLIVNSVLLFLAFVVFLLVTLAILTALRLCAYCCNIVNVSLVKPSFYVYS
RVKNLNSSRVPDLLV
>QNO82165.1 |envelope protein [Severe acute respiratory syndrome coronavirus 2]
MYSFVSEETGTLIVNSVLLFLAFVVFLLVTLAILTALRLCAYCCNIVNVSLVKPSFYVYS
RVKNLNSSRVPDLLV
>QNO82177.1 |envelope protein [Severe acute respiratory syndrome coronavirus 2]
MYSFVSEETGTLIVNSVLLFLAFVVFLLVTLAILTALRLCAYCCNIVNVSLVKPSFYVYS
RVKNLNSSRVPDLLV
>QNO82189.1 |envelope protein [Severe acute respiratory syndrome coronavirus 2]
MYSFVSEETGTLIVNSVLLFLAFVVFLLVTLAILTALRLCAYCCNIVNVSLVKPSFYVYS
RVKNLNSSRVPDLLV
>QNO82201.1 |envelope protein [Severe acute respiratory syndrome coronavirus 2]
MYSFVSEETGTLIVNSVLLFLAFVVFLLVTLAILTALRLCAYCCNIVNVSLVKPSFYVYS
RVKNLNSSRVPDLLV
>QNO82213.1 |envelope protein [Severe acute respiratory syndrome coronavirus 2]
MYSFVSEETGTLIVNSVLLFLAFVVFLLVTLAILTALRLCAYCCNIVNVSLVKPSFYVYS
RVKNLNSSRVPDLLV
>QNO82225.1 |envelope protein [Severe acute respiratory syndrome coronavirus 2]
MYSFVSEETGTLIVNSVLLFLAFVVFLLVTLAILTALRLCAYCCNIVNVSLVKPSFYVYS
RVKNLNSSRVPDLLV
>QNO82237.1 |envelope protein [Severe acute respiratory syndrome coronavirus 2]
MYSFVSEETGTLIVNSVLLFLAFVVFLLVTLAILTALRLCAYCCNIVNVSLVKPSFYVYS
RVKNLNSSRVPDLLV
>QNO82249.1 |envelope protein [Severe acute respiratory syndrome coronavirus 2]
MYSFVSEETGTLIVNSVLLFLAFVVFLLVTLAILTALRLCAYCCNIVNVSLVKPSFYVYS
RVKNLNSSRVPDLLV
>QNO82261.1 |envelope protein [Severe acute respiratory syndrome coronavirus 2]
MYSFVSEETGTLIVNSVLLFLAFVVFLLVTLAILTALRLCAYCCNIVNVSLVKPSFYVYS
RVKNLNSSRVPDLLV
>QNO82273.1 |envelope protein [Severe acute respiratory syndrome coronavirus 2]
MYSFVSEETGTLIVNSVLLFLAFVVFLLVTLAILTALRLCAYCCNIVNVSLVKPSFYVYS
RVKNLNSSRVPDLLV
>QNO82285.1 |envelope protein [Severe acute respiratory syndrome coronavirus 2]
MYSFVSEETGTLIVNSVLLFLAFVVFLLVTLAILTALRLCAYCCNIVNVSLVKPSFYVYS
RVKNLNSSRVPDLLV
>QNO82297.1 |envelope protein [Severe acute respiratory syndrome coronavirus 2]
MYSFVSEETGTLIVNSVLLFLAFVVFLLVTLAILTALRLCAYCCNIVNVSLVKPSFYVYS
RVKNLNSSRVPDLLV
>QNO82309.1 |envelope protein [Severe acute respiratory syndrome coronavirus 2]
MYSFVSEETGTLIVNSVLLFLAFVVFLLVTLAILTALRLCAYCCNIVNVSLVKPSFYVYS
RVKNLNSSRVPDLLV
>QNO82321.1 |envelope protein [Severe acute respiratory syndrome coronavirus 2]
MYSFVSEETGTLIVNSVLLFLAFVVFLLVTLAILTALRLCAYCCNIVNVSLVKPSFYVYS
RVKNLNSSRVPDLLV
>QNO82333.1 |envelope protein [Severe acute respiratory syndrome coronavirus 2]
MYSFVSEETGTLIVNSVLLFLAFVVFLLVTLAILTALRLCAYCCNIVNVSLVKPSFYVYS
RVKNLNSSRVPDLLV
>QNO82345.1 |envelope protein [Severe acute respiratory syndrome coronavirus 2]
MYSFVSEETGTLIVNSVLLFLAFVVFLLVTLAILTALRLCAYCCNIVNVSLVKPSFYVYS
RVKNLNSSRVPDLLV
>QNO82357.1 |envelope protein [Severe acute respiratory syndrome coronavirus 2]
MYSFVSEETGTLIVNSVLLFLAFVVFLLVTLAILTALRLCAYCCNIVNVSLVKPSFYVYS
RVKNLNSSRVPDLLV
>QNO82369.1 |envelope protein [Severe acute respiratory syndrome coronavirus 2]
MYSFVSEETGTLIVNSVLLFLAFVVFLLVTLAILTALRLCAYCCNIVNVSLVKPSFYVYS
RVKNLNSSRVPDLLV
>QNO82381.1 |envelope protein [Severe acute respiratory syndrome coronavirus 2]
MYSFVSEETGTLIVNSVLLFLAFVVFLLVTLAILTALRLCAYCCNIVNVSLVKPSFYVYS
RVKNLNSSRVPDLLV
>QNO82393.1 |envelope protein [Severe acute respiratory syndrome coronavirus 2]
MYSFVSEETGTLIVNSVLLFLAFVVFLLVTLAILTALRLCAYCCNIVNVSLVKPSFYVYS
RVKNLNSSRVPDLLV
>QNO82405.1 |envelope protein [Severe acute respiratory syndrome coronavirus 2]
MYSFVSEETGTLIVNSVLLFLAFVVFLLVTLAILTALRLCAYCCNIVNVSLVKPSFYVYS
RVKNLNSSRVPDLLV
>QNO82417.1 |envelope protein [Severe acute respiratory syndrome coronavirus 2]
MYSFVSEETGTLIVNSVLLFLAFVVFLLVTLAILTALRLCAYCCNIVNVSLVKPSFYVYS
RVKNLNSSRVPDLLV
>QNO82429.1 |envelope protein [Severe acute respiratory syndrome coronavirus 2]
MYSFVSEETGTLIVNSVLLFLAFVVFLLVTLAILTALRLCAYCCNIVNVSLVKPSFYVYS
RVKNLNSSRVPDLLV
>QNO82441.1 |envelope protein [Severe acute respiratory syndrome coronavirus 2]
MYSFVSEETGTLIVNSVLLFLAFVVFLLVTLAILTALRLCAYCCNIVNVSLVKPSFYVYS
RVKNLNSSRVPDLLV
>QNO82453.1 |envelope protein [Severe acute respiratory syndrome coronavirus 2]
MYSFVSEETGTLIVNSVLLFLAFVVFLLVTLAILTALRLCAYCCNIVNVSLVKPSFYVYS
RVKNLNSSRVPDLLV
>QNO82465.1 |envelope protein [Severe acute respiratory syndrome coronavirus 2]
MYSFVSEETGTLIVNSVLLFLAFVVFLLVTLAILTALRLCAYCCNIVNVSLVKPSFYVYS
RVKNLNSSRVPDLLV
>QNO82477.1 |envelope protein [Severe acute respiratory syndrome coronavirus 2]
MYSFVSEETGTLIVNSVLLFLAFVVFLLVTLAILTALRLCAYCCNIVNVSLVKPSFYVYS
RVKNLNSSRVPDLLV
>QNO82489.1 |envelope protein [Severe acute respiratory syndrome coronavirus 2]
MYSFVSEETGTLIVNSVLLFLAFVVFLLVTLAILTALRLCAYCCNIVNVSLVKPSFYVYS
RVKNLNSSRVPDLLV
>QNO82501.1 |envelope protein [Severe acute respiratory syndrome coronavirus 2]
MYSFVSEETGTLIVNSVLLFLAFVVFLLVTLAILTALRLCAYCCNIVNVSLVKPSFYVYS
RVKNLNSSRVPDLLV
>QNO82513.1 |envelope protein [Severe acute respiratory syndrome coronavirus 2]
MYSFVSEETGTLIVNSVLLFLAFVVFLLVTLAILTALRLCAYCCNIVNVSLVKPSFYVYS
RVKNLNSSRVPDLLV
>QNO82525.1 |envelope protein [Severe acute respiratory syndrome coronavirus 2]
MYSFVSEETGTLIVNSVLLFLAFVVFLLVTLAILTALRLCAYCCNIVNVSLVKPSFYVYS
RVKNLNSSRVPDLLV
>QNO82537.1 |envelope protein [Severe acute respiratory syndrome coronavirus 2]
MYSFVSEETGTLIVNSVLLFLAFVVFLLVTLAILTALRLCAYCCNIVNVSLVKPSFYVYS
RVKNLNSSRVPDLLV
>QNO82549.1 |envelope protein [Severe acute respiratory syndrome coronavirus 2]
MYSFVSEETGTLIVNSVLLFLAFVVFLLVTLAILTALRLCAYCCNIVNVSLVKPSFYVYS
RVKNLNSSRVPDLLV
>QNO82561.1 |envelope protein [Severe acute respiratory syndrome coronavirus 2]
MYSFVSEETGTLIVNSVLLFLAFVVFLLVTLAILTALRLCAYCCNIVNVSLVKPSFYVYS
RVKNLNSSRVPDLLV
>QNO82573.1 |envelope protein [Severe acute respiratory syndrome coronavirus 2]
MYSFVSEETGTLIVNSVLLFLAFVVFLLVTLAILTALRLCAYCCNIVNVSLVKPSFYVYS
RVKNLNSSRVPDLLV
>QNO82585.1 |envelope protein [Severe acute respiratory syndrome coronavirus 2]
MYSFVSEETGTLIVNSVLLFLAFVVFLLVTLAILTALRLCAYCCNIVNVSLVKPSFYVYS
RVKNLNSSRVPDLLV
>QNO82597.1 |envelope protein [Severe acute respiratory syndrome coronavirus 2]
MYSFVSEETGTLIVNSVLLFLAFVVFLLVTLAILTALRLCAYCCNIVNVSLVKPSFYVYS
RVKNLNSSRVPDLLV
>QNO82609.1 |envelope protein [Severe acute respiratory syndrome coronavirus 2]
MYSFVSEETGTLIVNSVLLFLAFVVFLLVTLAILTALRLCAYCCNIVNVSLVKPSFYVYS
RVKNLNSSRVPDLLV
>QNO82621.1 |envelope protein [Severe acute respiratory syndrome coronavirus 2]
MYSFVSEETGTLIVNSVLLFLAFVVFLLVTLAILTALRLCAYCCNIVNVSLVKPSFYVYS
RVKNLNSSRVPDLLV
>QNO82633.1 |envelope protein [Severe acute respiratory syndrome coronavirus 2]
MYSFVSEETGTLIVNSVLLFLAFVVFLLVTLAILTALRLCAYCCNIVNVSLVKPSFYVYS
RVKNLNSSRVPDLLV
>QNO82645.1 |envelope protein [Severe acute respiratory syndrome coronavirus 2]
MYSFVSEETGTLIVNSVLLFLAFVVFLLVTLAILTALRLCAYCCNIVNVSLVKPSFYVYS
RVKNLNSSRVPDLLV
>QNO82657.1 |envelope protein [Severe acute respiratory syndrome coronavirus 2]
MYSFVSEETGTLIVNSVLLFLAFVVFLLVTLAILTALRLCAYCCNIVNVSLVKPSFYVYS
RVKNLNSSRVPDLLV
>QNO82669.1 |envelope protein [Severe acute respiratory syndrome coronavirus 2]
MYSFVSEETGTLIVNSVLLFLAFVVFLLVTLAILTALRLCAYCCNIVNVSLVKPSFYVYS
RVKNLNSSRVPDLLV
>QNO82681.1 |envelope protein [Severe acute respiratory syndrome coronavirus 2]
MYSFVSEETGTLIVNSVLLFLAFVVFLLVTLAILTALRLCAYCCNIVNVSLVKPSFYVYS
RVKNLNSSRVPDLLV
>QNO82693.1 |envelope protein [Severe acute respiratory syndrome coronavirus 2]
MYSFVSEETGTLIVNSVLLFLAFVVFLLVTLAILTALRLCAYCCNIVNVSLVKPSFYVYS
RVKNLNSSRVPDLLV
>QNO82705.1 |envelope protein [Severe acute respiratory syndrome coronavirus 2]
MYSFVSEETGTLIVNSVLLFLAFVVFLLVTLAILTALRLCAYCCNIVNVSLVKPSFYVYS
RVKNLNSSRVPDLLV
>QNO82717.1 |envelope protein [Severe acute respiratory syndrome coronavirus 2]
MYSFVSEETGTLIVNSVLLFLAFVVFLLVTLAILTALRLCAYCCNIVNVSLVKPSFYVYS
RVKNLNSSRVPDLLV
>QNO82729.1 |envelope protein [Severe acute respiratory syndrome coronavirus 2]
MYSFVSEETGTLIVNSVLLFLAFVVFLLVTLAILTALRLCAYCCNIVNVSLVKPSFYVYS
RVKNLNSSRVPDLLV
>QNO82741.1 |envelope protein [Severe acute respiratory syndrome coronavirus 2]
MYSFVSEETGTLIVNSVLLFLAFVVFLLVTLAILTALRLCAYCCNIVNVSLVKPSFYVYS
RVKNLNSSRVPDLLV
>QNO82753.1 |envelope protein [Severe acute respiratory syndrome coronavirus 2]
MYSFVSEETGTLIVNSVLLFLAFVVFLLVTLAILTALRLCAYCCNIVNVSLVKPSFYVYS
RVKNLNSSRVPDLLV
>QNO82765.1 |envelope protein [Severe acute respiratory syndrome coronavirus 2]
MYSFVSEETGTLIVNSVLLFLAFVVFLLVTLAILTALRLCAYCCNIVNVSLVKPSFYVYS
RVKNLNSSRVPDLLV
>QNO82777.1 |envelope protein [Severe acute respiratory syndrome coronavirus 2]
MYSFVSEETGTLIVNSVLLFLAFVVFLLVTLAILTALRLCAYCCNIVNVSLVKPSFYVYS
RVKNLNSSRVPDLLV
>QNO82789.1 |envelope protein [Severe acute respiratory syndrome coronavirus 2]
MYSFVSEETGTLIVNSVLLFLAFVVFLLVTLAILTALRLCAYCCNIVNVSLVKPSFYVYS
RVKNLNSSRVPDLLV
>QNO82801.1 |envelope protein [Severe acute respiratory syndrome coronavirus 2]
MYSFVSEETGTLIVNSVLLFLAFVVFLLVTLAILTALRLCAYCCNIVNVSLVKPSFYVYS
RVKNLNSSRVPDLLV
>QNO82813.1 |envelope protein [Severe acute respiratory syndrome coronavirus 2]
MYSFVSEETGTLIVNSVLLFLAFVVFLLVTLAILTALRLCAYCCNIVNVSLVKPSFYVYS
RVKNLNSSRVPDLLV
>QNO82825.1 |envelope protein [Severe acute respiratory syndrome coronavirus 2]
MYSFVSEETGTLIVNSVLLFLAFVVFLLVTLAILTALRLCAYCCNIVNVSLVKPSFYVYS
RVKNLNSSRVPDLLV
>QNO82837.1 |envelope protein [Severe acute respiratory syndrome coronavirus 2]
MYSFVSEETGTLIVNSVLLFLAFVVFLLVTLAILTALRLCAYCCNIVNVSLVKPSFYVYS
RVKNLNSSRVPDLLV
>QNO82849.1 |envelope protein [Severe acute respiratory syndrome coronavirus 2]
MYSFVSEETGTLIVNSVLLFLAFVVFLLVTLAILTALRLCAYCCNIVNVSLVKPSFYVYS
RVKNLNSSRVPDLLV
>QNO82861.1 |envelope protein [Severe acute respiratory syndrome coronavirus 2]
MYSFVSEETGTLIVNSVLLFLAFVVFLLVTLAILTALRLCAYCCNIVNVSLVKPSFYVYS
RVKNLNSSRVPDLLV
>QNO82873.1 |envelope protein [Severe acute respiratory syndrome coronavirus 2]
MYSFVSEETGTLIVNSVLLFLAFVVFLLVTLAILTALRLCAYCCNIVNVSLVKPSFYVYS
RVKNLNSSRVPDLLV
>QNO82885.1 |envelope protein [Severe acute respiratory syndrome coronavirus 2]
MYSFVSEETGTLIVNSVLLFLAFVVFLLVTLAILTALRLCAYCCNIVNVSLVKPSFYVYS
RVKNLNSSRVPDLLV
>QNO82897.1 |envelope protein [Severe acute respiratory syndrome coronavirus 2]
MYSFVSEETGTLIVNSVLLFLAFVVFLLVTLAILTALRLCAYCCNIVNVSLVKPSFYVYS
RVKNLNSSRVPDLLV
>QNO82909.1 |envelope protein [Severe acute respiratory syndrome coronavirus 2]
MYSFVSEETGTLIVNSVLLFLAFVVFLLVTLAILTALRLCAYCCNIVNVSLVKPSFYVYS
RVKNLNSSRVPDLLV
>QNO82921.1 |envelope protein [Severe acute respiratory syndrome coronavirus 2]
MYSFVSEETGTLIVNSVLLFLAFVVFLLVTLAILTALRLCAYCCNIVNVSLVKPSFYVYS
RVKNLNSSRVPDLLV
>QNO82933.1 |envelope protein [Severe acute respiratory syndrome coronavirus 2]
MYSFVSEETGTLIVNSVLLFLAFVVFLLVTLAILTALRLCAYCCNIVNVSLVKPSFYVYS
RVKNLNSSRVPDLLV
>QNO82945.1 |envelope protein [Severe acute respiratory syndrome coronavirus 2]
MYSFVSEETGTLIVNSVLLFLAFVVFLLVTLAILTALRLCAYCCNIVNVSLVKPSFYVYS
RVKNLNSSRVPDLLV
>QNO82957.1 |envelope protein [Severe acute respiratory syndrome coronavirus 2]
MYSFVSEETGTLIVNSVLLFLAFVVFLLVTLAILTALRLCAYCCNIVNVSLVKPSFYVYS
RVKNLNSSRVPDLLV
>QNO82969.1 |envelope protein [Severe acute respiratory syndrome coronavirus 2]
MYSFVSEETGTLIVNSVLLFLAFVVFLLVTLAILTALRLCAYCCNIVNVSLVKPSFYVYS
RVKNLNSSRVPDLLV
>QNO82981.1 |envelope protein [Severe acute respiratory syndrome coronavirus 2]
MYSFVSEETGTLIVNSVLLFLAFVVFLLVTLAILTALRLCAYCCNIVNVSLVKPSFYVYS
RVKNLNSSRVPDLLV
>QNO82993.1 |envelope protein [Severe acute respiratory syndrome coronavirus 2]
MYSFVSEETGTLIVNSVLLFLAFVVFLLVTLAILTALRLCAYCCNIVNVSLVKPSFYVYS
RVKNLNSSRVPDLLV
>QNO83005.1 |envelope protein [Severe acute respiratory syndrome coronavirus 2]
MYSFVSEETGTLIVNSVLLFLAFVVFLLVTLAILTALRLCAYCCNIVNVSLVKPSFYVYS
RVKNLNSSRVPDLLV
>QNO83017.1 |envelope protein [Severe acute respiratory syndrome coronavirus 2]
MYSFVSEETGTLIVNSVLLFLAFVVFLLVTLAILTALRLCAYCCNIVNVSLVKPSFYVYS
RVKNLNSSRVPDLLV
>QNO83029.1 |envelope protein [Severe acute respiratory syndrome coronavirus 2]
MYSFVSEETGTLIVNSVLLFLAFVVFLLVTLAILTALRLCAYCCNIVNVSLVKPSFYVYS
RVKNLNSSRVPDLLV
>QNO83041.1 |envelope protein [Severe acute respiratory syndrome coronavirus 2]
MYSFVSEETGTLIVNSVLLFLAFVVFLLVTLAILTALRLCAYCCNIVNVSLVKPSFYVYS
RVKNLNSSRVPDLLV
>QNO83053.1 |envelope protein [Severe acute respiratory syndrome coronavirus 2]
MYSFVSEETGTLIVNSVLLFLAFVVFLLVTLAILTALRLCAYCCNIVNVSLVKPSFYVYS
RVKNLNSSRVPDLLV
>QNO83065.1 |envelope protein [Severe acute respiratory syndrome coronavirus 2]
MYSFVSEETGTLIVNSVLLFLAFVVFLLVTLAILTALRLCAYCCNIVNVSLVKPSFYVYS
RVKNLNSSRVPDLLV
>QNO83077.1 |envelope protein [Severe acute respiratory syndrome coronavirus 2]
MYSFVSEETGTLIVNSVLLFLAFVVFLLVTLAILTALRLCAYCCNIVNVSLVKPSFYVYS
RVKNLNSSRVPDLLV
>QNO83089.1 |envelope protein [Severe acute respiratory syndrome coronavirus 2]
MYSFVSEETGTLIVNSVLLFLAFVVFLLVTLAILTALRLCAYCCNIVNVSLVKPSFYVYS
RVKNLNSSRVPDLLV
>QNO83101.1 |envelope protein [Severe acute respiratory syndrome coronavirus 2]
MYSFVSEETGTLIVNSVLLFLAFVVFLLVTLAILTALRLCAYCCNIVNVSLVKPSFYVYS
RVKNLNSSRVPDLLV
>QNO83113.1 |envelope protein [Severe acute respiratory syndrome coronavirus 2]
MYSFVSEETGTLIVNSVLLFLAFVVFLLVTLAILTALRLCAYCCNIVNVSLVKPSFYVYS
RVKNLNSSRVPDLLV
>QNO83125.1 |envelope protein [Severe acute respiratory syndrome coronavirus 2]
MYSFVSEETGTLIVNSVLLFLAFVVFLLVTLAILTALRLCAYCCNIVNVSLVKPSFYVYS
RVKNLNSSRVPDLLV
>QNO83137.1 |envelope protein [Severe acute respiratory syndrome coronavirus 2]
MYSFVSEETGTLIVNSVLLFLAFVVFLLVTLAILTALRLCAYCCNIVNVSLVKPSFYVYS
RVKNLNSSRVPDLLV
>QNO83149.1 |envelope protein [Severe acute respiratory syndrome coronavirus 2]
MYSFVSEETGTLIVNSVLLFLAFVVFLLVTLAILTALRLCAYCCNIVNVSLVKPSFYVYS
RVKNLNSSRVPDLLV
>QNO83161.1 |envelope protein [Severe acute respiratory syndrome coronavirus 2]
MYSFVSEETGTLIVNSVLLFLAFVVFLLVTLAILTALRLCAYCCNIVNVSLVKPSFYVYS
RVKNLNSSRVPDLLV
>QNO83173.1 |envelope protein [Severe acute respiratory syndrome coronavirus 2]
MYSFVSEETGTLIVNSVLLFLAFVVFLLVTLAILTALRLCAYCCNIVNVSLVKPSFYVYS
RVKNLNSSRVPDLLV
>QNO83185.1 |envelope protein [Severe acute respiratory syndrome coronavirus 2]
MYSFVSEETGTLIVNSVLLFLAFVVFLLVTLAILTALRLCAYCCNIVNVSLVKPSFYVYS
RVKNLNSSRVPDLLV
>QNO83197.1 |envelope protein [Severe acute respiratory syndrome coronavirus 2]
MYSFVSEETGTLIVNSVLLFLAFVVFLLVTLAILTALRLCAYCCNIVNVSLVKPSFYVYS
RVKNLNSSRVPDLLV
>QNO83209.1 |envelope protein [Severe acute respiratory syndrome coronavirus 2]
MYSFVSEETGTLIVNSVLLFLAFVVFLLVTLAILTALRLCAYCCNIVNVSLVKPSFYVYS
RVKNLNSSRVPDLLV
>QNO83221.1 |envelope protein [Severe acute respiratory syndrome coronavirus 2]
MYSFVSEETGTLIVNSVLLFLAFVVFLLVTLAILTALRLCAYCCNIVNVSLVKPSFYVYS
RVKNLNSSRVPDLLV
>QNO83233.1 |envelope protein [Severe acute respiratory syndrome coronavirus 2]
MYSFVSEETGTLIVNSVLLFLAFVVFLLVTLAILTALRLCAYCCNIVNVSLVKPSFYVYS
RVKNLNSSRVPDLLV
>QNO83245.1 |envelope protein [Severe acute respiratory syndrome coronavirus 2]
MYSFVSEETGTLIVNSVLLFLAFVVFLLVTLAILTALRLCAYCCNIVNVSLVKPSFYVYS
RVKNLNSSRVPDLLV
>QNO83257.1 |envelope protein [Severe acute respiratory syndrome coronavirus 2]
MYSFVSEETGTLIVNSVLLFLAFVVFLLVTLAILTALRLCAYCCNIVNVSLVKPSFYVYS
RVKNLNSSRVPDLLV
>QNO83269.1 |envelope protein [Severe acute respiratory syndrome coronavirus 2]
MYSFVSEETGTLIVNSVLLFLAFVVFLLVTLAILTALRLCAYCCNIVNVSLVKPSFYVYS
RVKNLNSSRVPDLLV
>QNO83281.1 |envelope protein [Severe acute respiratory syndrome coronavirus 2]
MYSFVSEETGTLIVNSVLLFLAFVVFLLVTLAILTALRLCAYCCNIVNVSLVKPSFYVYS
RVKNLNSSRVPDLLV
>QNO83293.1 |envelope protein [Severe acute respiratory syndrome coronavirus 2]
MYSFVSEETGTLIVNSVLLFLAFVVFLLVTLAILTALRLCAYCCNIVNVSLVKPSFYVYS
RVKNLNSSRVPDLLV
>QNO83305.1 |envelope protein [Severe acute respiratory syndrome coronavirus 2]
MYSFVSEETGTLIVNSVLLFLAFVVFLLVTLAILTALRLCAYCCNIVNVSLVKPSFYVYS
RVKNLNSSRVPDLLV
>QNO83317.1 |envelope protein [Severe acute respiratory syndrome coronavirus 2]
MYSFVSEETGTLIVNSVLLFLAFVVFLLVTLAILTALRLCAYCCNIVNVSLVKPSFYVYS
RVKNLNSSRVPDLLV
>QNO83329.1 |envelope protein [Severe acute respiratory syndrome coronavirus 2]
MYSFVSEETGTLIVNSVLLFLAFVVFLLVTLAILTALRLCAYCCNIVNVSLVKPSFYVYS
RVKNLNSSRVPDLLV
>QNO83341.1 |envelope protein [Severe acute respiratory syndrome coronavirus 2]
MYSFVSEETGTLIVNSVLLFLAFVVFLLVTLAILTALRLCAYCCNIVNVSLVKPSFYVYS
RVKNLNSSRVPDLLV
>QNO83353.1 |envelope protein [Severe acute respiratory syndrome coronavirus 2]
MYSFVSEETGTLIVNSVLLFLAFVVFLLVTLAILTALRLCAYCCNIVNVSLVKPSFYVYS
RVKNLNSSRVPDLLV
>QNO83365.1 |envelope protein [Severe acute respiratory syndrome coronavirus 2]
MYSFVSEETGTLIVNSVLLFLAFVVFLLVTLAILTALRLCAYCCNIVNVSLVKPSFYVYS
RVKNLNSSRVPDLLV
>QNO83377.1 |envelope protein [Severe acute respiratory syndrome coronavirus 2]
MYSFVSEETGTLIVNSVLLFLAFVVFLLVTLAILTALRLCAYCCNIVNVSLVKPSFYVYS
RVKNLNSSRVPDLLV
>QNO83389.1 |envelope protein [Severe acute respiratory syndrome coronavirus 2]
MYSFVSEETGTLIVNSVLLFLAFVVFLLVTLAILTALRLCAYCCNIVNVSLVKPSFYVYS
RVKNLNSSRVPDLLV
>QNO83401.1 |envelope protein [Severe acute respiratory syndrome coronavirus 2]
MYSFVSEETGTLIVNSVLLFLAFVVFLLVTLAILTALRLCAYCCNIVNVSLVKPSFYVYS
RVKNLNSSRVPDLLV
>QNO83413.1 |envelope protein [Severe acute respiratory syndrome coronavirus 2]
MYSFVSEETGTLIVNSVLLFLAFVVFLLVTLAILTALRLCAYCCNIVNVSLVKPSFYVYS
RVKNLNSSRVPDLLV
>QNO83425.1 |envelope protein [Severe acute respiratory syndrome coronavirus 2]
MYSFVSEETGTLIVNSVLLFLAFVVFLLVTLAILTALRLCAYCCNIVNVSLVKPSFYVYS
RVKNLNSSRVPDLLV
>QNO83437.1 |envelope protein [Severe acute respiratory syndrome coronavirus 2]
MYSFVSEETGTLIVNSVLLFLAFVVFLLVTLAILTALRLCAYCCNIVNVSLVKPSFYVYS
RVKNLNSSRVPDLLV
>QNO83449.1 |envelope protein [Severe acute respiratory syndrome coronavirus 2]
MYSFVSEETGTLIVNSVLLFLAFVVFLLVTLAILTALRLCAYCCNIVNVSLVKPSFYVYS
RVKNLNSSRVPDLLV
>QNO83461.1 |envelope protein [Severe acute respiratory syndrome coronavirus 2]
MYSFVSEETGTLIVNSVLLFLAFVVFLLVTLAILTALRLCAYCCNIVNVSLVKPSFYVYS
RVKNLNSSRVPDLLV
>QNO83473.1 |envelope protein [Severe acute respiratory syndrome coronavirus 2]
MYSFVSEETGTLIVNSVLLFLAFVVFLLVTLAILTALRLCAYCCNIVNVSLVKPSFYVYS
RVKNLNSSRVPDLLV
>QNO83485.1 |envelope protein [Severe acute respiratory syndrome coronavirus 2]
MYSFVSEETGTLIVNSVLLFLAFVVFLLVTLAILTALRLCAYCCNIVNVSLVKPSFYVYS
RVKNLNSSRVPDLLV
>QNO83497.1 |envelope protein [Severe acute respiratory syndrome coronavirus 2]
MYSFVSEETGTLIVNSVLLFLAFVVFLLVTLAILTALRLCAYCCNIVNVSLVKPSFYVYS
RVKNLNSSRVPDLLV
>QNO83509.1 |envelope protein [Severe acute respiratory syndrome coronavirus 2]
MYSFVSEETGTLIVNSVLLFLAFVVFLLVTLAILTALRLCAYCCNIVNVSLVKPSFYVYS
RVKNLNSSRVPDLLV
>QNO83521.1 |envelope protein [Severe acute respiratory syndrome coronavirus 2]
MYSFVSEETGTLIVNSVLLFLAFVVFLLVTLAILTALRLCAYCCNIVNVSLVKPSFYVYS
RVKNLNSSRVPDLLV
>QNO83533.1 |envelope protein [Severe acute respiratory syndrome coronavirus 2]
MYSFVSEETGTLIVNSVLLFLAFVVFLLVTLAILTALRLCAYCCNIVNVSLVKPSFYVYS
RVKNLNSSRVPDLLV
>QNO83545.1 |envelope protein [Severe acute respiratory syndrome coronavirus 2]
MYSFVSEETGTLIVNSVLLFLAFVVFLLVTLAILTALRLCAYCCNIVNVSLVKPSFYVYS
RVKNLNSSRVPDLLV
>QNO83557.1 |envelope protein [Severe acute respiratory syndrome coronavirus 2]
MYSFVSEETGTLIVNSVLLFLAFVVFLLVTLAILTALRLCAYCCNIVNVSLVKPSFYVYS
RVKNLNSSRVPDLLV
>QNO83569.1 |envelope protein [Severe acute respiratory syndrome coronavirus 2]
MYSFVSEETGTLIVNSVLLFLAFVVFLLVTLAILTALRLCAYCCNIVNVSLVKPSFYVYS
RVKNLNSSRVPDLLV
>QNO83581.1 |envelope protein [Severe acute respiratory syndrome coronavirus 2]
MYSFVSEETGTLIVNSVLLFLAFVVFLLVTLAILTALRLCAYCCNIVNVSLVKPSFYVYS
RVKNLNSSRVPDLLV
>QNO83593.1 |envelope protein [Severe acute respiratory syndrome coronavirus 2]
MYSFVSEETGTLIVNSVLLFLAFVVFLLVTLAILTALRLCAYCCNIVNVSLVKPSFYVYS
RVKNLNSSRVPDLLV
>QNO83605.1 |envelope protein [Severe acute respiratory syndrome coronavirus 2]
MYSFVSEETGTLIVNSVLLFLAFVVFLLVTLAILTALRLCAYCCNIVNVSLVKPSFYVYS
RVKNLNSSRVPDLLV
>QNO83617.1 |envelope protein [Severe acute respiratory syndrome coronavirus 2]
MYSFVSEETGTLIVNSVLLFLAFVVFLLVTLAILTALRLCAYCCNIVNVSLVKPSFYVYS
RVKNLNSSRVPDLLV
>QNO83629.1 |envelope protein [Severe acute respiratory syndrome coronavirus 2]
MYSFVSEETGTLIVNSVLLFLAFVVFLLVTLAILTALRLCAYCCNIVNVSLVKPSFYVYS
RVKNLNSSRVPDLLV
>QNO83641.1 |envelope protein [Severe acute respiratory syndrome coronavirus 2]
MYSFVSEETGTLIVNSVLLFLAFVVFLLVTLAILTALRLCAYCCNIVNVSLVKPSFYVYS
RVKNLNSSRVPDLLV
>QNO83653.1 |envelope protein [Severe acute respiratory syndrome coronavirus 2]
MYSFVSEETGTLIVNSVLLFLAFVVFLLVTLAILTALRLCAYCCNIVNVSLVKPSFYVYS
RVKNLNSSRVPDLLV
>QNO83665.1 |envelope protein [Severe acute respiratory syndrome coronavirus 2]
MYSFVSEETGTLIVNSVLLFLAFVVFLLVTLAILTALRLCAYCCNIVNVSLVKPSFYVYS
RVKNLNSSRVPDLLV
>QNO83677.1 |envelope protein [Severe acute respiratory syndrome coronavirus 2]
MYSFVSEETGTLIVNSVLLFLAFVVFLLVTLAILTALRLCAYCCNIVNVSLVKPSFYVYS
RVKNLNSSRVPDLLV
>QNO83689.1 |envelope protein [Severe acute respiratory syndrome coronavirus 2]
MYSFVSEETGTLIVNSVLLFLAFVVFLLVTLAILTALRLCAYCCNIVNVSLVKPSFYVYS
RVKNLNSSRVPDLLV
>QNO83701.1 |envelope protein [Severe acute respiratory syndrome coronavirus 2]
MYSFVSEETGTLIVNSVLLFLAFVVFLLVTLAILTALRLCAYCCNIVNVSLVKPSFYVYS
RVKNLNSSRVPDLLV
>QNO83713.1 |envelope protein [Severe acute respiratory syndrome coronavirus 2]
MYSFVSEETGTLIVNSVLLFLAFVVFLLVTLAILTALRLCAYCCNIVNVSLVKPSFYVYS
RVKNLNSSRVPDLLV
>QNO83725.1 |envelope protein [Severe acute respiratory syndrome coronavirus 2]
MYSFVSEETGTLIVNSVLLFLAFVVFLLVTLAILTALRLCAYCCNIVNVSLVKPSFYVYS
RVKNLNSSRVPDLLV
>QNO83737.1 |envelope protein [Severe acute respiratory syndrome coronavirus 2]
MYSFVSEETGTLIVNSVLLFLAFVVFLLVTLAILTALRLCAYCCNIVNVSLVKPSFYVYS
RVKNLNSSRVPDLLV
>QNO83749.1 |envelope protein [Severe acute respiratory syndrome coronavirus 2]
MYSFVSEETGTLIVNSVLLFLAFVVFLLVTLAILTALRLCAYCCNIVNVSLVKPSFYVYS
RVKNLNSSRVPDLLV
>QNO83761.1 |envelope protein [Severe acute respiratory syndrome coronavirus 2]
MYSFVSEETGTLIVNSVLLFLAFVVFLLVTLAILTALRLCAYCCNIVNVSLVKPSFYVYS
RVKNLNSSRVPDLLV
>QNO83773.1 |envelope protein [Severe acute respiratory syndrome coronavirus 2]
MYSFVSEETGTLIVNSVLLFLAFVVFLLVTLAILTALRLCAYCCNIVNVSLVKPSFYVYS
RVKNLNSSRVPDLLV
>QNO83785.1 |envelope protein [Severe acute respiratory syndrome coronavirus 2]
MYSFVSEETGTLIVNSVLLFLAFVVFLLVTLAILTALRLCAYCCNIVNVSLVKPSFYVYS
RVKNLNSSRVPDLLV
>QNO83797.1 |envelope protein [Severe acute respiratory syndrome coronavirus 2]
MYSFVSEETGTLIVNSVLLFLAFVVFLLVTLAILTALRLCAYCCNIVNVSLVKPSFYVYS
RVKNLNSSRVPDLLV
>QNO83809.1 |envelope protein [Severe acute respiratory syndrome coronavirus 2]
MYSFVSEETGTLIVNSVLLFLAFVVFLLVTLAILTALRLCAYCCNIVNVSLVKPSFYVYS
RVKNLNSSRVPDLLV
>QNO83821.1 |envelope protein [Severe acute respiratory syndrome coronavirus 2]
MYSFVSEETGTLIVNSVLLFLAFVVFLLVTLAILTALRLCAYCCNIVNVSLVKPSFYVYS
RVKNLNSSRVPDLLV
>QNO83833.1 |envelope protein [Severe acute respiratory syndrome coronavirus 2]
MYSFVSEETGTLIVNSVLLFLAFVVFLLVTLAILTALRLCAYCCNIVNVSLVKPSFYVYS
RVKNLNSSRVPDLLV
>QNO83845.1 |envelope protein [Severe acute respiratory syndrome coronavirus 2]
MYSFVSEETGTLIVNSVLLFLAFVVFLLVTLAILTALRLCAYCCNIVNVSLVKPSFYVYS
RVKNLNSSRVPDLLV
>QNO83857.1 |envelope protein [Severe acute respiratory syndrome coronavirus 2]
MYSFVSEETGTLIVNSVLLFLAFVVFLLVTLAILTALRLCAYCCNIVNVSLVKPSFYVYS
RVKNLNSSRVPDLLV
>QNO83869.1 |envelope protein [Severe acute respiratory syndrome coronavirus 2]
MYSFVSEETGTLIVNSVLLFLAFVVFLLVTLAILTALRLCAYCCNIVNVSLVKPSFYVYS
RVKNLNSSRVPDLLV
>QNO83881.1 |envelope protein [Severe acute respiratory syndrome coronavirus 2]
MYSFVSEETGTLIVNSVLLFLAFVVFLLVTLAILTALRLCAYCCNIVNVSLVKPSFYVYS
RVKNLNSSRVPDLLV
>QNO83893.1 |envelope protein [Severe acute respiratory syndrome coronavirus 2]
MYSFVSEETGTLIVNSVLLFLAFVVFLLVTLAILTALRLCAYCCNIVNVSLVKPSFYVYS
RVKNLNSSRVPDLLV
>QNO83905.1 |envelope protein [Severe acute respiratory syndrome coronavirus 2]
MYSFVSEETGTLIVNSVLLFLAFVVFLLVTLAILTALRLCAYCCNIVNVSLVKPSFYVYS
RVKNLNSSRVPDLLV
>QNO83917.1 |envelope protein [Severe acute respiratory syndrome coronavirus 2]
MYSFVSEETGTLIVNSVLLFLAFVVFLLVTLAILTALRLCAYCCNIVNVSLVKPSFYVYS
RVKNLNSSRVPDLLV
>QNO83929.1 |envelope protein [Severe acute respiratory syndrome coronavirus 2]
MYSFVSEETGTLIVNSVLLFLAFVVFLLVTLAILTALRLCAYCCNIVNVSLVKPSFYVYS
RVKNLNSSRVPDLLV
>QNO83941.1 |envelope protein [Severe acute respiratory syndrome coronavirus 2]
MYSFVSEETGTLIVNSVLLFLAFVVFLLVTLAILTALRLCAYCCNIVNVSLVKPSFYVYS
RVKNLNSSRVPDLLV
>QNO83953.1 |envelope protein [Severe acute respiratory syndrome coronavirus 2]
MYSFVSEETGTLIVNSVLLFLAFVVFLLVTLAILTALRLCAYCCNIVNVSLVKPSFYVYS
RVKNLNSSRVPDLLV
>QNO83965.1 |envelope protein [Severe acute respiratory syndrome coronavirus 2]
MYSFVSEETGTLIVNSVLLFLAFVVFLLVTLAILTALRLCAYCCNIVNVSLVKPSFYVYS
RVKNLNSSRVPDLLV
>QNO83977.1 |envelope protein [Severe acute respiratory syndrome coronavirus 2]
MYSFVSEETGTLIVNSVLLFLAFVVFLLVTLAILTALRLCAYCCNIVNVSLVKPSFYVYS
RVKNLNSSRVPDLLV
>QNO83989.1 |envelope protein [Severe acute respiratory syndrome coronavirus 2]
MYSFVSEETGTLIVNSVLLFLAFVVFLLVTLAILTALRLCAYCCNIVNVSLVKPSFYVYS
RVKNLNSSRVPDLLV
>QNO84001.1 |envelope protein [Severe acute respiratory syndrome coronavirus 2]
MYSFVSEETGTLIVNSVLLFLAFVVFLLVTLAILTALRLCAYCCNIVNVSLVKPSFYVYS
RVKNLNSSRVPDLLV
>QNO84013.1 |envelope protein [Severe acute respiratory syndrome coronavirus 2]
MYSFVSEETGTLIVNSVLLFLAFVVFLLVTLAILTALRLCAYCCNIVNVSLVKPSFYVYS
RVKNLNSSRVPDLLV
>QNO84025.1 |envelope protein [Severe acute respiratory syndrome coronavirus 2]
MYSFVSEETGTLIVNSVLLFLAFVVFLLVTLAILTALRLCAYCCNIVNVSLVKPSFYVYS
RVKNLNSSRVPDLLV
>QNO84037.1 |envelope protein [Severe acute respiratory syndrome coronavirus 2]
MYSFVSEETGTLIVNSVLLFLAFVVFLLVTLAILTALRLCAYCCNIVNVSLVKPSFYVYS
RVKNLNSSRVPDLLV
>QNO84049.1 |envelope protein [Severe acute respiratory syndrome coronavirus 2]
MYSFVSEETGTLIVNSVLLFLAFVVFLLVTLAILTALRLCAYCCNIVNVSLVKPSFYVYS
RVKNLNSSRVPDLLV
>QNO84061.1 |envelope protein [Severe acute respiratory syndrome coronavirus 2]
MYSFVSEETGTLIVNSVLLFLAFVVFLLVTLAILTALRLCAYCCNIVNVSLVKPSFYVYS
RVKNLNSSRVPDLLV
>QNO84073.1 |envelope protein [Severe acute respiratory syndrome coronavirus 2]
MYSFVSEETGTLIVNSVLLFLAFVVFLLVTLAILTALRLCAYCCNIVNVSLVKPSFYVYS
RVKNLNSSRVPDLLV
>QNO84085.1 |envelope protein [Severe acute respiratory syndrome coronavirus 2]
MYSFVSEETGTLIVNSVLLFLAFVVFLLVTLAILTALRLCAYCCNIVNVSLVKPSFYVYS
RVKNLNSSRVPDLLV
>QNO84097.1 |envelope protein [Severe acute respiratory syndrome coronavirus 2]
MYSFVSEETGTLIVNSVLLFLAFVVFLLVTLAILTALRLCAYCCNIVNVSLVKPSFYVYS
RVKNLNSSRVPDLLV
>QNO84109.1 |envelope protein [Severe acute respiratory syndrome coronavirus 2]
MYSFVSEETGTLIVNSVLLFLAFVVFLLVTLAILTALRLCAYCCNIVNVSLVKPSFYVYS
RVKNLNSSRVPDLLV
>QNO84121.1 |envelope protein [Severe acute respiratory syndrome coronavirus 2]
MYSFVSEETGTLIVNSVLLFLAFVVFLLVTLAILTALRLCAYCCNIVNVSLVKPSFYVYS
RVKNLNSSRVPDLLV
>QNO84133.1 |envelope protein [Severe acute respiratory syndrome coronavirus 2]
MYSFVSEETGTLIVNSVLLFLAFVVFLLVTLAILTALRLCAYCCNIVNVSLVKPSFYVYS
RVKNLNSSRVPDLLV
>QNO84145.1 |envelope protein [Severe acute respiratory syndrome coronavirus 2]
MYSFVSEETGTLIVNSVLLFLAFVVFLLVTLAILTALRLCAYCCNIVNVSLVKPSFYVYS
RVKNLNSSRVPDLLV
>QNO84157.1 |envelope protein [Severe acute respiratory syndrome coronavirus 2]
MYSFVSEETGTLIVNSVLLFLAFVVFLLVTLAILTALRLCAYCCNIVNVSLVKPSFYVYS
RVKNLNSSRVPDLLV
>QNO84169.1 |envelope protein [Severe acute respiratory syndrome coronavirus 2]
MYSFVSEETGTLIVNSVLLFLAFVVFLLVTLAILTALRLCAYCCNIVNVSLVKPSFYVYS
RVKNLNSSRVPDLLV
>QNO84181.1 |envelope protein [Severe acute respiratory syndrome coronavirus 2]
MYSFVSEETGTLIVNSVLLFLAFVVFLLVTLAILTALRLCAYCCNIVNVSLVKPSFYVYS
RVKNLNSSRVPDLLV
>QNO84193.1 |envelope protein [Severe acute respiratory syndrome coronavirus 2]
MYSFVSEETGTLIVNSVLLFLAFVVFLLVTLAILTALRLCAYCCNIVNVSLVKPSFYVYS
RVKNLNSSRVPDLLV
>QNO84205.1 |envelope protein [Severe acute respiratory syndrome coronavirus 2]
MYSFVSEETGTLIVNSVLLFLAFVVFLLVTLAILTALRLCAYCCNIVNVSLVKPSFYVYS
RVKNLNSSRVPDLLV
>QNO84217.1 |envelope protein [Severe acute respiratory syndrome coronavirus 2]
MYSFVSEETGTLIVNSVLLFLAFVVFLLVTLAILTALRLCAYCCNIVNVSLVKPSFYVYS
RVKNLNSSRVPDLLV
>QNO84229.1 |envelope protein [Severe acute respiratory syndrome coronavirus 2]
MYSFVSEETGTLIVNSVLLFLAFVVFLLVTLAILTALRLCAYCCNIVNVSLVKPSFYVYS
RVKNLNSSRVPDLLV
>QNO84241.1 |envelope protein [Severe acute respiratory syndrome coronavirus 2]
MYSFVSEETGTLIVNSVLLFLAFVVFLLVTLAILTALRLCAYCCNIVNVSLVKPSFYVYS
RVKNLNSSRVPDLLV
>QNO84253.1 |envelope protein [Severe acute respiratory syndrome coronavirus 2]
MYSFVSEETGTLIVNSVLLFLAFVVFLLVTLAILTALRLCAYCCNIVNVSLVKPSFYVYS
RVKNLNSSRVPDLLV
>QNO84265.1 |envelope protein [Severe acute respiratory syndrome coronavirus 2]
MYSFVSEETGTLIVNSVLLFLAFVVFLLVTLAILTALRLCAYCCNIVNVSLVKPSFYVYS
RVKNLNSSRVPDLLV
>QNO84277.1 |envelope protein [Severe acute respiratory syndrome coronavirus 2]
MYSFVSEETGTLIVNSVLLFLAFVVFLLVTLAILTALRLCAYCCNIVNVSLVKPSFYVYS
RVKNLNSSRVPDLLV
>QNO84289.1 |envelope protein [Severe acute respiratory syndrome coronavirus 2]
MYSFVSEETGTLIVNSVLLFLAFVVFLLVTLAILTALRLCAYCCNIVNVSLVKPSFYVYS
RVKNLNSSRVPDLLV
>QNO84301.1 |envelope protein [Severe acute respiratory syndrome coronavirus 2]
MYSFVSEETGTLIVNSVLLFLAFVVFLLVTLAILTALRLCAYCCNIVNVSLVKPSFYVYS
RVKNLNSSRVPDLLV
>QNO84313.1 |envelope protein [Severe acute respiratory syndrome coronavirus 2]
MYSFVSEETGTLIVNSVLLFLAFVVFLLVTLAILTALRLCAYCCNIVNVSLVKPSFYVYS
RVKNLNSSRVPDLLV
>QNO84325.1 |envelope protein [Severe acute respiratory syndrome coronavirus 2]
MYSFVSEETGTLIVNSVLLFLAFVVFLLVTLAILTALRLCAYCCNIVNVSLVKPSFYVYS
RVKNLNSSRVPDLLV
>QNO84337.1 |envelope protein [Severe acute respiratory syndrome coronavirus 2]
MYSFVSEETGTLIVNSVLLFLAFVVFLLVTLAILTALRLCAYCCNIVNVSLVKPSFYVYS
RVKNLNSSRVPDLLV
>QNO84349.1 |envelope protein [Severe acute respiratory syndrome coronavirus 2]
MYSFVSEETGTLIVNSVLLFLAFVVFLLVTLAILTALRLCAYCCNIVNVSLVKPSFYVYS
RVKNLNSSRVPDLLV
>QNO84361.1 |envelope protein [Severe acute respiratory syndrome coronavirus 2]
MYSFVSEETGTLIVNSVLLFLAFVVFLLVTLAILTALRLCAYCCNIVNVSLVKPSFYVYS
RVKNLNSSRVPDLLV
>QNO84373.1 |envelope protein [Severe acute respiratory syndrome coronavirus 2]
MYSFVSEETGTLIVNSVLLFLAFVVFLLVTLAILTALRLCAYCCNIVNVSLVKPSFYVYS
RVKNLNSSRVPDLLV
>QNO84385.1 |envelope protein [Severe acute respiratory syndrome coronavirus 2]
MYSFVSEETGTLIVNSVLLFLAFVVFLLVTLAILTALRLCAYCCNIVNVSLVKPSFYVYS
RVKNLNSSRVPDLLV
>QNO84397.1 |envelope protein [Severe acute respiratory syndrome coronavirus 2]
MYSFVSEETGTLIVNSVLLFLAFVVFLLVTLAILTALRLCAYCCNIVNVSLVKPSFYVYS
RVKNLNSSRVPDLLV
>QNO84409.1 |envelope protein [Severe acute respiratory syndrome coronavirus 2]
MYSFVSEETGTLIVNSVLLFLAFVVFLLVTLAILTALRLCAYCCNIVNVSLVKPSFYVYS
RVKNLNSSRVPDLLV
>QNO84421.1 |envelope protein [Severe acute respiratory syndrome coronavirus 2]
MYSFVSEETGTLIVNSVLLFLAFVVFLLVTLAILTALRLCAYCCNIVNVSLVKPSFYVYS
RVKNLNSSRVPDLLV
>QNO84433.1 |envelope protein [Severe acute respiratory syndrome coronavirus 2]
MYSFVSEETGTLIVNSVLLFLAFVVFLLVTLAILTALRLCAYCCNIVNVSLVKPSFYVYS
RVKNLNSSRVPDLLV
>QNO84445.1 |envelope protein [Severe acute respiratory syndrome coronavirus 2]
MYSFVSEETGTLIVNSVLLFLAFVVFLLVTLAILTALRLCAYCCNIVNVSLVKPSFYVYS
RVKNLNSSRVPDLLV
>QNO84457.1 |envelope protein [Severe acute respiratory syndrome coronavirus 2]
MYSFVSEETGTLIVNSVLLFLAFVVFLLVTLAILTALRLCAYCCNIVNVSLVKPSFYVYS
RVKNLNSSRVPDLLV
>QNO84469.1 |envelope protein [Severe acute respiratory syndrome coronavirus 2]
MYSFVSEETGTLIVNSVLLFLAFVVFLLVTLAILTALRLCAYCCNIVNVSLVKPSFYVYS
RVKNLNSSRVPDLLV
>QNO84481.1 |envelope protein [Severe acute respiratory syndrome coronavirus 2]
MYSFVSEETGTLIVNSVLLFLAFVVFLLVTLAILTALRLCAYCCNIVNVSLVKPSFYVYS
RVKNLNSSRVPDLLV
>QNO84493.1 |envelope protein [Severe acute respiratory syndrome coronavirus 2]
MYSFVSEETGTLIVNSVLLFLAFVVFLLVTLAILTALRLCAYCCNIVNVSLVKPSFYVYS
RVKNLNSSRVPDLLV
>QNO84505.1 |envelope protein [Severe acute respiratory syndrome coronavirus 2]
MYSFVSEETGTLIVNSVLLFLAFVVFLLVTLAILTALRLCAYCCNIVNVSLVKPSFYVYS
RVKNLNSSRVPDLLV
>QNO84517.1 |envelope protein [Severe acute respiratory syndrome coronavirus 2]
MYSFVSEETGTLIVNSVLLFLAFVVFLLVTLAILTALRLCAYCCNIVNVSLVKPSFYVYS
RVKNLNSSRVPDLLV
>QNO84529.1 |envelope protein [Severe acute respiratory syndrome coronavirus 2]
MYSFVSEETGTLIVNSVLLFLAFVVFLLVTLAILTALRLCAYCCNIVNVSLVKPSFYVYS
RVKNLNSSRVPDLLV
>QNO84541.1 |envelope protein [Severe acute respiratory syndrome coronavirus 2]
MYSFVSEETGTLIVNSVLLFLAFVVFLLVTLAILTALRLCAYCCNIVNVSLVKPSFYVYS
RVKNLNSSRVPDLLV
>QNO84553.1 |envelope protein [Severe acute respiratory syndrome coronavirus 2]
MYSFVSEETGTLIVNSVLLFLAFVVFLLVTLAILTALRLCAYCCNIVNVSLVKPSFYVYS
RVKNLNSSRVPDLLV
>QNO84565.1 |envelope protein [Severe acute respiratory syndrome coronavirus 2]
MYSFVSEETGTLIVNSVLLFLAFVVFLLVTLAILTALRLCAYCCNIVNVSLVKPSFYVYS
RVKNLNSSRVPDLLV
>QNO84577.1 |envelope protein [Severe acute respiratory syndrome coronavirus 2]
MYSFVSEETGTLIVNSVLLFLAFVVFLLVTLAILTALRLCAYCCNIVNVSLVKPSFYVYS
RVKNLNSSRVPDLLV
>QNO84589.1 |envelope protein [Severe acute respiratory syndrome coronavirus 2]
MYSFVSEETGTLIVNSVLLFLAFVVFLLVTLAILTALRLCAYCCNIVNVSLVKPSFYVYS
RVKNLNSSRVPDLLV
>QNO84601.1 |envelope protein [Severe acute respiratory syndrome coronavirus 2]
MYSFVSEETGTLIVNSVLLFLAFVVFLLVTLAILTALRLCAYCCNIVNVSLVKPSFYVYS
RVKNLNSSRVPDLLV
>QNO84613.1 |envelope protein [Severe acute respiratory syndrome coronavirus 2]
MYSFVSEETGTLIVNSVLLFLAFVVFLLVTLAILTALRLCAYCCNIVNVSLVKPSFYVYS
RVKNLNSSRVPDLLV
>QNO84625.1 |envelope protein [Severe acute respiratory syndrome coronavirus 2]
MYSFVSEETGTLIVNSVLLFLAFVVFLLVTLAILTALRLCAYCCNIVNVSLVKPSFYVYS
RVKNLNSSRVPDLLV
>QNO84637.1 |envelope protein [Severe acute respiratory syndrome coronavirus 2]
MYSFVSEETGTLIVNSVLLFLAFVVFLLVTLAILTALRLCAYCCNIVNVSLVKPSFYVYS
RVKNLNSSRVPDLLV
>QNO84649.1 |envelope protein [Severe acute respiratory syndrome coronavirus 2]
MYSFVSEETGTLIVNSVLLFLAFVVFLLVTLAILTALRLCAYCCNIVNVSLVKPSFYVYS
RVKNLNSSRVPDLLV
>QNO84661.1 |envelope protein [Severe acute respiratory syndrome coronavirus 2]
MYSFVSEETGTLIVNSVLLFLAFVVFLLVTLAILTALRLCAYCCNIVNVSLVKPSFYVYS
RVKNLNSSRVPDLLV
>QNO84673.1 |envelope protein [Severe acute respiratory syndrome coronavirus 2]
MYSFVSEETGTLIVNSVLLFLAFVVFLLVTLAILTALRLCAYCCNIVNVSLVKPSFYVYS
RVKNLNSSRVPDLLV
>QNO84685.1 |envelope protein [Severe acute respiratory syndrome coronavirus 2]
MYSFVSEETGTLIVNSVLLFLAFVVFLLVTLAILTALRLCAYCCNIVNVSLVKPSFYVYS
RVKNLNSSRVPDLLV
>QNO84697.1 |envelope protein [Severe acute respiratory syndrome coronavirus 2]
MYSFVSEETGTLIVNSVLLFLAFVVFLLVTLAILTALRLCAYCCNIVNVSLVKPSFYVYS
RVKNLNSSRVPDLLV
>QNO84709.1 |envelope protein [Severe acute respiratory syndrome coronavirus 2]
MYSFVSEETGTLIVNSVLLFLAFVVFLLVTLAILTALRLCAYCCNIVNVSLVKPSFYVYS
RVKNLNSSRVPDLLV
>QNO84721.1 |envelope protein [Severe acute respiratory syndrome coronavirus 2]
MYSFVSEETGTLIVNSVLLFLAFVVFLLVTLAILTALRLCAYCCNIVNVSLVKPSFYVYS
RVKNLNSSRVPDLLV
>QNO84733.1 |envelope protein [Severe acute respiratory syndrome coronavirus 2]
MYSFVSEETGTLIVNSVLLFLAFVVFLLVTLAILTALRLCAYCCNIVNVSLVKPSFYVYS
RVKNLNSSRVPDLLV
>QNO84745.1 |envelope protein [Severe acute respiratory syndrome coronavirus 2]
MYSFVSEETGTLIVNSVLLFLAFVVFLLVTLAILTALRLCAYCCNIVNVSLVKPSFYVYS
RVKNLNSSRVPDLLV
>QNO84757.1 |envelope protein [Severe acute respiratory syndrome coronavirus 2]
MYSFVSEETGTLIVNSVLLFLAFVVFLLVTLAILTALRLCAYCCNIVNVSLVKPSFYVYS
RVKNLNSSRVPDLLV
>QNO84769.1 |envelope protein [Severe acute respiratory syndrome coronavirus 2]
MYSFVSEETGTLIVNSVLLFLAFVVFLLVTLAILTALRLCAYCCNIVNVSLVKPSFYVYS
RVKNLNSSRVPDLLV
>QNO84781.1 |envelope protein [Severe acute respiratory syndrome coronavirus 2]
MYSFVSEETGTLIVNSVLLFLAFVVFLLVTLAILTALRLCAYCCNIVNVSLVKPSFYVYS
RVKNLNSSRVPDLLV
>QNO84793.1 |envelope protein [Severe acute respiratory syndrome coronavirus 2]
MYSFVSEETGTLIVNSVLLFLAFVVFLLVTLAILTALRLCAYCCNIVNVSLVKPSFYVYS
RVKNLNSSRVPDLLV
>QNO84805.1 |envelope protein [Severe acute respiratory syndrome coronavirus 2]
MYSFVSEETGTLIVNSVLLFLAFVVFLLVTLAILTALRLCAYCCNIVNVSLVKPSFYVYS
RVKNLNSSRVPDLLV
>QNO84817.1 |envelope protein [Severe acute respiratory syndrome coronavirus 2]
MYSFVSEETGTLIVNSVLLFLAFVVFLLVTLAILTALRLCAYCCNIVNVSLVKPSFYVYS
RVKNLNSSRVPDLLV
>QNO84829.1 |envelope protein [Severe acute respiratory syndrome coronavirus 2]
MYSFVSEETGTLIVNSVLLFLAFVVFLLVTLAILTALRLCAYCCNIVNVSLVKPSFYVYS
RVKNLNSSRVPDLLV
>QNO84841.1 |envelope protein [Severe acute respiratory syndrome coronavirus 2]
MYSFVSEETGTLIVNSVLLFLAFVVFLLVTLAILTALRLCAYCCNIVNVSLVKPSFYVYS
RVKNLNSSRVPDLLV
>QNO84853.1 |envelope protein [Severe acute respiratory syndrome coronavirus 2]
MYSFVSEETGTLIVNSVLLFLAFVVFLLVTLAILTALRLCAYCCNIVNVSLVKPSFYVYS
RVKNLNSSRVPDLLV
>QNO84865.1 |envelope protein [Severe acute respiratory syndrome coronavirus 2]
MYSFVSEETGTLIVNSVLLFLAFVVFLLVTLAILTALRLCAYCCNIVNVSLVKPSFYVYS
RVKNLNSSRVPDLLV
>QNO84877.1 |envelope protein [Severe acute respiratory syndrome coronavirus 2]
MYSFVSEETGTLIVNSVLLFLAFVVFLLVTLAILTALRLCAYCCNIVNVSLVKPSFYVYS
RVKNLNSSRVPDLLV
>QNO84889.1 |envelope protein [Severe acute respiratory syndrome coronavirus 2]
MYSFVSEETGTLIVNSVLLFLAFVVFLLVTLAILTALRLCAYCCNIVNVSLVKPSFYVYS
RVKNLNSSRVPDLLV
>QNO84901.1 |envelope protein [Severe acute respiratory syndrome coronavirus 2]
MYSFVSEETGTLIVNSVLLFLAFVVFLLVTLAILTALRLCAYCCNIVNVSLVKPSFYVYS
RVKNLNSSRVPDLLV
>QNO84913.1 |envelope protein [Severe acute respiratory syndrome coronavirus 2]
MYSFVSEETGTLIVNSVLLFLAFVVFLLVTLAILTALRLCAYCCNIVNVSLVKPSFYVYS
RVKNLNSSRVPDLLV
>QNO84925.1 |envelope protein [Severe acute respiratory syndrome coronavirus 2]
MYSFVSEETGTLIVNSVLLFLAFVVFLLVTLAILTALRLCAYCCNIVNVSLVKPSFYVYS
RVKNLNSSRVPDLLV
>QNO84937.1 |envelope protein [Severe acute respiratory syndrome coronavirus 2]
MYSFVSEETGTLIVNSVLLFLAFVVFLLVTLAILTALRLCAYCCNIVNVSLVKPSFYVYS
RVKNLNSSRVPDLLV
>QNO84949.1 |envelope protein [Severe acute respiratory syndrome coronavirus 2]
MYSFVSEETGTLIVNSVLLFLAFVVFLLVTLAILTALRLCAYCCNIVNVSLVKPSFYVYS
RVKNLNSSRVPDLLV
>QNO84961.1 |envelope protein [Severe acute respiratory syndrome coronavirus 2]
MYSFVSEETGTLIVNSVLLFLAFVVFLLVTLAILTALRLCAYCCNIVNVSLVKPSFYVYS
RVKNLNSSRVPDLLV
>QNO84973.1 |envelope protein [Severe acute respiratory syndrome coronavirus 2]
MYSFVSEETGTLIVNSVLLFLAFVVFLLVTLAILTALRLCAYCCNIVNVSLVKPSFYVYS
RVKNLNSSRVPDLLV
>QNO84985.1 |envelope protein [Severe acute respiratory syndrome coronavirus 2]
MYSFVSEETGTLIVNSVLLFLAFVVFLLVTLAILTALRLCAYCCNIVNVSLVKPSFYVYS
RVKNLNSSRVPDLLV
>QNO84997.1 |envelope protein [Severe acute respiratory syndrome coronavirus 2]
MYSFVSEETGTLIVNSVLLFLAFVVFLLVTLAILTALRLCAYCCNIVNVSLVKPSFYVYS
RVKNLNSSRVPDLLV
>QNO85009.1 |envelope protein [Severe acute respiratory syndrome coronavirus 2]
MYSFVSEETGTLIVNSVLLFLAFVVFLLVTLAILTALRLCAYCCNIVNVSLVKPSFYVYS
RVKNLNSSRVPDLLV
>QNO85021.1 |envelope protein [Severe acute respiratory syndrome coronavirus 2]
MYSFVSEETGTLIVNSVLLFLAFVVFLLVTLAILTALRLCAYCCNIVNVSLVKPSFYVYS
RVKNLNSSRVPDLLV
>QNO85033.1 |envelope protein [Severe acute respiratory syndrome coronavirus 2]
MYSFVSEETGTLIVNSVLLFLAFVVFLLVTLAILTALRLCAYCCNIVNVSLVKPSFYVYS
RVKNLNSSRVPDLLV
>QNO85045.1 |envelope protein [Severe acute respiratory syndrome coronavirus 2]
MYSFVSEETGTLIVNSVLLFLAFVVFLLVTLAILTALRLCAYCCNIVNVSLVKPSFYVYS
RVKNLNSSRVPDLLV
>QNO85057.1 |envelope protein [Severe acute respiratory syndrome coronavirus 2]
MYSFVSEETGTLIVNSVLLFLAFVVFLLVTLAILTALRLCAYCCNIVNVSLVKPSFYVYS
RVKNLNSSRVPDLLV
>QNO85069.1 |envelope protein [Severe acute respiratory syndrome coronavirus 2]
MYSFVSEETGTLIVNSVLLFLAFVVFLLVTLAILTALRLCAYCCNIVNVSLVKPSFYVYS
RVKNLNSSRVPDLLV
>QNO85081.1 |envelope protein [Severe acute respiratory syndrome coronavirus 2]
MYSFVSEETGTLIVNSVLLFLAFVVFLLVTLAILTALRLCAYCCNIVNVSLVKPSFYVYS
RVKNLNSSRVPDLLV
>QNO85093.1 |envelope protein [Severe acute respiratory syndrome coronavirus 2]
MYSFVSEETGTLIVNSVLLFLAFVVFLLVTLAILTALRLCAYCCNIVNVSLVKPSFYVYS
RVKNLNSSRVPDLLV
>QNO85105.1 |envelope protein [Severe acute respiratory syndrome coronavirus 2]
MYSFVSEETGTLIVNSVLLFLAFVVFLLVTLAILTALRLCAYCCNIVNVSLVKPSFYVYS
RVKNLNSSRVPDLLV
>QNO85117.1 |envelope protein [Severe acute respiratory syndrome coronavirus 2]
MYSFVSEETGTLIVNSVLLFLAFVVFLLVTLAILTALRLCAYCCNIVNVSLVKPSFYVYS
RVKNLNSSRVPDLLV
>QNO85129.1 |envelope protein [Severe acute respiratory syndrome coronavirus 2]
MYSFVSEETGTLIVNSVLLFLAFVVFLLVTLAILTALRLCAYCCNIVNVSLVKPSFYVYS
RVKNLNSSRVPDLLV
>QNO85141.1 |envelope protein [Severe acute respiratory syndrome coronavirus 2]
MYSFVSEETGTLIVNSVLLFLAFVVFLLVTLAILTALRLCAYCCNIVNVSLVKPSFYVYS
RVKNLNSSRVPDLLV
>QNO85153.1 |envelope protein [Severe acute respiratory syndrome coronavirus 2]
MYSFVSEETGTLIVNSVLLFLAFVVFLLVTLAILTALRLCAYCCNIVNVSLVKPSFYVYS
RVKNLNSSRVPDLLV
>QNO85165.1 |envelope protein [Severe acute respiratory syndrome coronavirus 2]
MYSFVSEETGTLIVNSVLLFLAFVVFLLVTLAILTALRLCAYCCNIVNVSLVKPSFYVYS
RVKNLNSSRVPDLLV
>QNO85177.1 |envelope protein [Severe acute respiratory syndrome coronavirus 2]
MYSFVSEETGTLIVNSVLLFLAFVVFLLVTLAILTALRLCAYCCNIVNVSLVKPSFYVYS
RVKNLNSSRVPDLLV
>QNO85189.1 |envelope protein [Severe acute respiratory syndrome coronavirus 2]
MYSFVSEETGTLIVNSVLLFLAFVVFLLVTLAILTALRLCAYCCNIVNVSLVKPSFYVYS
RVKNLNSSRVPDLLV
>QNO85201.1 |envelope protein [Severe acute respiratory syndrome coronavirus 2]
MYSFVSEETGTLIVNSVLLFLAFVVFLLVTLAILTALRLCAYCCNIVNVSLVKPSFYVYS
RVKNLNSSRVPDLLV
>QNO85213.1 |envelope protein [Severe acute respiratory syndrome coronavirus 2]
MYSFVSEETGTLIVNSVLLFLAFVVFLLVTLAILTALRLCAYCCNIVNVSLVKPSFYVYS
RVKNLNSSRVPDLLV
>QNO85225.1 |envelope protein [Severe acute respiratory syndrome coronavirus 2]
MYSFVSEETGTLIVNSVLLFLAFVVFLLVTLAILTALRLCAYCCNIVNVSLVKPSFYVYS
RVKNLNSSRVPDLLV
>QNO85237.1 |envelope protein [Severe acute respiratory syndrome coronavirus 2]
MYSFVSEETGTLIVNSVLLFLAFVVFLLVTLAILTALRLCAYCCNIVNVSLVKPSFYVYS
RVKNLNSSRVPDLLV
>QNO85249.1 |envelope protein [Severe acute respiratory syndrome coronavirus 2]
MYSFVSEETGTLIVNSVLLFLAFVVFLLVTLAILTALRLCAYCCNIVNVSLVKPSFYVYS
RVKNLNSSRVPDLLV
>QNO85261.1 |envelope protein [Severe acute respiratory syndrome coronavirus 2]
MYSFVSEETGTLIVNSVLLFLAFVVFLLVTLAILTALRLCAYCCNIVNVSLVKPSFYVYS
RVKNLNSSRVPDLLV
>QNO85273.1 |envelope protein [Severe acute respiratory syndrome coronavirus 2]
MYSFVSEETGTLIVNSVLLFLAFVVFLLVTLAILTALRLCAYCCNIVNVSLVKPSFYVYS
RVKNLNSSRVPDLLV
>QNO85285.1 |envelope protein [Severe acute respiratory syndrome coronavirus 2]
MYSFVSEETGTLIVNSVLLFLAFVVFLLVTLAILTALRLCAYCCNIVNVSLVKPSFYVYS
RVKNLNSSRVPDLLV
>QNO85297.1 |envelope protein [Severe acute respiratory syndrome coronavirus 2]
MYSFVSEETGTLIVNSVLLFLAFVVFLLVTLAILTALRLCAYCCNIVNVSLVKPSFYVYS
RVKNLNSSRVPDLLV
>QNO85309.1 |envelope protein [Severe acute respiratory syndrome coronavirus 2]
MYSFVSEETGTLIVNSVLLFLAFVVFLLVTLAILTALRLCAYCCNIVNVSLVKPSFYVYS
RVKNLNSSRVPDLLV
>QNO85321.1 |envelope protein [Severe acute respiratory syndrome coronavirus 2]
MYSFVSEETGTLIVNSVLLFLAFVVFLLVTLAILTALRLCAYCCNIVNVSLVKPSFYVYS
RVKNLNSSRVPDLLV
>QNO85333.1 |envelope protein [Severe acute respiratory syndrome coronavirus 2]
MYSFVSEETGTLIVNSVLLFLAFVVFLLVTLAILTALRLCAYCCNIVNVSLVKPSFYVYS
RVKNLNSSRVPDLLV
>QNO85345.1 |envelope protein [Severe acute respiratory syndrome coronavirus 2]
MYSFVSEETGTLIVNSVLLFLAFVVFLLVTLAILTALRLCAYCCNIVNVSLVKPSFYVYS
RVKNLNSSRVPDLLV
>QNO85357.1 |envelope protein [Severe acute respiratory syndrome coronavirus 2]
MYSFVSEETGTLIVNSVLLFLAFVVFLLVTLAILTALRLCAYCCNIVNVSLVKPSFYVYS
RVKNLNSSRVPDLLV
>QNO85369.1 |envelope protein [Severe acute respiratory syndrome coronavirus 2]
MYSFVSEETGTLIVNSVLLFLAFVVFLLVTLAILTALRLCAYCCNIVNVSLVKPSFYVYS
RVKNLNSSRVPDLLV
>QNO85381.1 |envelope protein [Severe acute respiratory syndrome coronavirus 2]
MYSFVSEETGTLIVNSVLLFLAFVVFLLVTLAILTALRLCAYCCNIVNVSLVKPSFYVYS
RVKNLNSSRVPDLLV
>QNO85393.1 |envelope protein [Severe acute respiratory syndrome coronavirus 2]
MYSFVSEETGTLIVNSVLLFLAFVVFLLVTLAILTALRLCAYCCNIVNVSLVKPSFYVYS
RVKNLNSSRVPDLLV
>QNO85405.1 |envelope protein [Severe acute respiratory syndrome coronavirus 2]
MYSFVSEETGTLIVNSVLLFLAFVVFLLVTLAILTALRLCAYCCNIVNVSLVKPSFYVYS
RVKNLNSSRVPDLLV
>QNO85417.1 |envelope protein [Severe acute respiratory syndrome coronavirus 2]
MYSFVSEETGTLIVNSVLLFLAFVVFLLVTLAILTALRLCAYCCNIVNVSLVKPSFYVYS
RVKNLNSSRVPDLLV
>QNO85429.1 |envelope protein [Severe acute respiratory syndrome coronavirus 2]
MYSFVSEETGTLIVNSVLLFLAFVVFLLVTLAILTALRLCAYCCNIVNVSLVKPSFYVYS
RVKNLNSSRVPDLLV
>QNO85441.1 |envelope protein [Severe acute respiratory syndrome coronavirus 2]
MYSFVSEETGTLIVNSVLLFLAFVVFLLVTLAILTALRLCAYCCNIVNVSLVKPSFYVYS
RVKNLNSSRVPDLLV
>QNO85453.1 |envelope protein [Severe acute respiratory syndrome coronavirus 2]
MYSFVSEETGTLIVNSVLLFLAFVVFLLVTLAILTALRLCAYCCNIVNVSLVKPSFYVYS
RVKNLNSSRVPDLLV
>QNO85465.1 |envelope protein [Severe acute respiratory syndrome coronavirus 2]
MYSFVSEETGTLIVNSVLLFLAFVVFLLVTLAILTALRLCAYCCNIVNVSLVKPSFYVYS
RVKNLNSSRVPDLLV
>QNO85477.1 |envelope protein [Severe acute respiratory syndrome coronavirus 2]
MYSFVSEETGTLIVNSVLLFLAFVVFLLVTLAILTALRLCAYCCNIVNVSLVKPSFYVYS
RVKNLNSSRVPDLLV
>QNO85489.1 |envelope protein [Severe acute respiratory syndrome coronavirus 2]
[truncated: 2,767,640 more chars]
